# Supplementary material for: Associations of the triglyceride–glucose index, triglyceride glucose–body mass index and waist–triglyceride index with mortality in patients with cardiovascular–kidney–metabolic syndrome stages 0-4: evidence from NHANES 1999-2020
Source: Research Square preprint supplement (doi:10.21203/rs.3.rs-6606978/v1), 2025-06-10
Supplement: Supplementary file 1 [file ce15eb6bf55cedac5995f721.xlsx]

## Sheet: Fd_up_update
SEQN	ALT	AST	BUN	BUNI	GLU	GLUI	BUA	BUAI	SCR	SCRI	GENDER	AGE	RACE	EDUCATION	PIR	WTINT	EGFR	WEIGHT	HIGHT	BMI	WAIST	HBALC	HDL	HDLI	TC	TCI	TG	TGI	LDL	LDLI	UPRO	UCR	UACR	ALQ	HCQ	BPSAR	BPDAR	RREDI	DI	BMIOW	HTG	UACRA	CKDDG	CKDG	CKD	FMH100	FMHLE	WAISTFAT	HHDL
58442	25	29	23	8.21	173	9.6	7.6	452	1.02	90.17	2	59	3	3	0.6	22865.4	63.37	84.2	163.9	31.34	107.6	9.1	44	1.14	332	8.59	491	5.543	115	2.97	126	23	547.83	1	0	1	132	0	1	3	1	3	3	2	1	30	3	1	0
3182	19	23	30	10.7	160	8.882	4.9	291.5	2.3	203.3	1	69	1	1	1.57	1728.78	29.99	62.3	162.8	23.51	85.3	7.5	39	1	206	5.33	319	3.6	104	2.69	10790	69	15637.7	1	0	1	110	0	1	1	1	3	4	5	1	30	3	0	0
33871	14	21	24	8.57	105	5.83	8	475.8	1.9	167.96	2	62	4	2	1.77	9807.06	29.49	72.1	150.7	31.75	99.3	5.9	58	1.5	225	5.82	90	1.016	149	3.853	1236	79	1564.56	1	0	1	100	1	0	3	0	3	4	5	1	18.51	2	1	1
16434	16	15	21	7.5	110	6.106	8.1	481.8	1.8	159.12	1	66	4	1	0.69	5064.45	41	154.8	189.1	43.29	149.6	5.9	49	1.27	190	4.91	132	1.49	115	2.97	187.6	139	134.96	1	1	1	119	1	0	3	0	2	4	4	1	30	3	1	1
31520	26	36	13	4.64	124	6.88	6.4	380.7	1.4	123.76	1	53	4	2	1.22	25858.4	60.1	70.4	165.4	25.73	90.6	5.4	85	2.2	206	5.33	58	0.655	109	2.819	44.7	99	45.15	1	0	1	113	0	1	2	0	2	2	2	1	11.2	2	0	1
45648	23	24	11	3.93	97	5.38	6.9	410.4	0.72	63.65	2	62	4	1	0.83	12648.6	94.48	91	151.1	39.86	117.8	6	72	1.86	283	7.32	93	1.05	192	4.965	10.3	30	34.33	2	0	1	89	1	0	3	0	2	2	1	0	21.5	3	1	1
41498	16	19	9	3.21	99	5.5	5.7	339	1.02	90.17	1	68	4	1	1.63	7540.29	80.06	77.4	165.8	28.16	95.5	5.8	47	1.22	149	3.85	71	0.802	88	2.276	37.4	137	27.3	1	0	1	91	1	0	2	0	1	1	2	0	29.4	3	0	1
25880	18	19	17	6.07	174	9.66	4.3	255.8	0.7	61.88	2	60	1	2	2.56	3916	98.95	73.1	157.8	29.36	98.6	7.5	50	1.29	255	6.59	267	3.014	152	3.931	2220	69	3217.39	1	0	1	101	0	1	2	1	3	3	1	0	24.8	3	1	1
56282	25	27	12	4.28	100	5.55	4.6	273.6	0.95	83.98	1	80	3	5	4.12	18987.4	80.92	73	172.2	24.62	96.2	5.4	82	2.12	224	5.79	97	1.095	123	3.181	7.9	50	15.8	2	0	1	81	1	0	1	0	1	1	2	0	30	3	0	1
49331	19	21	13	4.64	83	4.61	5	297.4	0.85	75.14	2	65	4	2	0.94	15785.3	75.98	66.8	155.1	27.77	92.5	5.8	69	1.78	353	9.13	163	1.84	251	6.491	37.6	137	27.45	1	1	1	71	1	0	2	1	1	1	2	0	24.8	3	1	1
63799	19	30	17	6.07	89	4.94	6.7	398.5	1.08	95.47	1	69	5	3	1.12	10288.3	74.29	65.6	155.4	27.2	93.2	5.8	64	1.66	316	8.17	93	1.05	233	6.025	1890	104	1817.31	2	0	1	91	1	0	2	0	3	3	2	1	29.4	3	1	1
18842	14	29	21	7.5	106	5.884	3.8	226	0.7	61.88	2	84	3	3	0.47	7277.19	85.23	48.1	156.1	19.74	80.8	5	52	1.34	215	5.56	98	1.11	143	3.7	31.7	136	23.31	1	1	1	72	1	0	1	0	1	1	2	0	21.5	3	0	1
43153	16	20	9	3.21	88	4.88	7.4	440.2	0.96	84.86	1	64	4	1	1.57	10497.3	88.27	92.1	169.7	31.98	112.8	6.1	30	0.78	215	5.56	131	1.479	159	4.112	74.5	127	58.66	2	0	1	77	1	0	3	0	2	2	2	1	30	3	1	0
24680	15	20	15	5.36	98	5.44	5.8	345	0.8	70.72	2	74	1	1	0.33	4289.96	77.27	82.3	155.8	33.91	111.4	5.5	41	1.06	182	4.71	110	1.242	119	3.077	111.6	61	182.95	2	0	1	81	0	0	3	0	2	2	2	1	27.5	3	1	0
34040	9	22	30	10.71	113	6.27	7.8	463.9	1.6	141.44	2	84	3	4	2.2	28479.7	31.61	65.2	154.8	27.21	99.6	6.1	50	1.29	212	5.48	141	1.592	134	3.465	415	72	576.39	1	1	1	47	1	0	2	1	3	4	4	1	30	3	1	1
49827	11	19	8	2.86	91	5.05	4.7	279.6	0.79	69.84	2	76	3	1	1.53	23231.8	77.47	59.8	153.6	25.35	90	6	42	1.09	247	6.39	226	2.552	160	4.138	5	56	8.93	1	0	1	106	1	0	2	1	1	1	2	0	30	3	1	0
19660	21	33	15	5.36	87	4.829	3.8	226	0.8	70.72	2	72	3	3	2.71	22284.1	78.24	43.7	155.5	18.07	73.2	5.1	62	1.6	230	5.95	120	1.35	144	3.72	5.2	32	16.25	2	0	1	72	0	0	1	0	1	1	2	0	18.51	2	0	1
54076	21	22	12	4.28	90	5	8.2	487.7	1.09	96.36	1	80	3	3	1.57	11998.4	68.61	62.9	154.4	26.38	97.5	5.9	38	0.98	204	5.28	134	1.513	139	3.595	5.3	42	12.62	1	1	1	90	1	0	2	0	1	1	2	1	30	3	0	0
61680	51	36	17	6.07	86	4.77	4.2	249.8	0.88	77.79	2	61	4	4	2.31	20090.3	74.72	60.7	152.5	26.1	88	5.5	65	1.68	178	4.6	70	0.79	99	2.56	100.1	252	39.72	1	0	1	91	0	0	2	0	2	2	2	1	13.7	2	1	1
16255	38	43	21	7.5	92	5.107	5.2	309.3	0.8	70.72	2	83	1	1	0.7	2987.74	73.06	49.1	158.1	19.64	84	5.4	65	1.68	263	6.8	153	1.73	167	4.32	22	34	64.71	1	0	1	90	0	0	1	1	2	2	2	1	30	3	0	1
28966	23	21	17	6.07	96	5.33	4.3	255.8	0.7	61.88	1	70	1	3	1.34	4264.57	99.12	107.2	177.6	33.99	118.6	5.3	52	1.34	211	5.46	159	1.795	127	3.284	30.7	126	24.37	2	0	1	73	0	0	3	1	1	1	1	0	30	3	1	1
4778	22	24	15	5.4	110	6.106	5.9	350.9	0.8	70.7	1	75	3	5	5	20310.7	92.29	89	171.8	30.15	105.5	5.3	34	0.87	185	4.78	207	2.34	110	2.84	78.5	207	37.92	2	0	1	0	1	0	3	1	2	2	1	0	30	3	1	0
14166	19	25	22	7.85	85	4.718	6.4	380.7	0.8	70.72	2	77	1	1	0.83	1530.04	75.84	70.4	153.9	29.72	101.5	5.4	61	1.58	225	5.82	66	0.75	151	3.9	62.3	37	168.38	1	0	1	99	0	0	2	0	2	2	2	1	27.5	3	1	1
5489	10	18	21	7.5	117	6.495	6.5	386.6	0.8	70.7	2	66	1	1	2.34	1083.49	81.21	68.4	154.1	28.8	94.5	5.7	31	0.8	194	5.02	262	2.96	111	2.87	242.5	24	1010.42	1	0	1	107	1	0	2	1	3	3	2	1	21.5	3	1	0
60812	225	47	17	6.07	95	5.27	6.6	392.6	0.82	72.49	2	74	3	1	0.8	20589	75.01	61.2	154.7	25.57	101.2	5.8	43	1.11	222	5.74	234	2.642	132	3.414	161.5	54	299.07	1	0	1	74	1	0	2	1	2	2	2	1	30	3	1	0
36119	30	31	30	10.71	131	7.27	7.1	422.3	1.4	123.76	1	83	2	3	0.98	6649.13	49.87	77.2	162.5	29.24	102.7	6.3	39	1.01	185	4.78	195	2.202	107	2.767	368	90	408.89	1	1	1	105	1	1	2	1	3	4	3	1	30	3	1	0
45829	26	22	30	10.71	92	5.11	7.5	446.1	1.62	143.21	1	80	3	3	2.92	22304.7	42.65	57.6	168.8	20.22	87.5	6.3	36	0.93	143	3.7	104	1.174	86	2.224	93.1	77	120.91	1	0	1	71	1	1	1	0	2	4	4	1	30	3	0	0
20791	25	25	22	7.85	87	4.829	6.8	404.5	1.2	106.08	2	83	3	3	2.19	7244.08	44.91	76.8	161.3	29.52	103	5.6	69	1.78	287	7.42	103	1.16	197	5.09	10.7	80	13.38	2	0	1	77	0	0	2	0	1	3	4	1	30	3	1	1
42404	19	20	35	12.5	130	7.22	5	297.4	1.47	129.95	1	79	3	3	5	39256.7	48.22	72.5	175	23.67	100.7	8.8	52	1.34	181	4.68	80	0.903	113	2.922	1123	130	863.85	1	0	1	92	0	1	1	0	3	4	3	1	30	3	0	1
51058	16	21	11	3.93	91	5.05	4.3	255.8	0.72	63.65	2	69	3	1	0.73	21236.8	90.45	87.9	165.4	32.13	105.6	5.6	108	2.79	318	8.22	36	0.406	203	5.25	339	16	2118.75	1	1	1	89	0	0	3	0	3	3	1	0	30	3	1	1
15777	15	16	10	3.57	87	4.829	5.8	345	0.6	53.04	2	43	4	2	1.31	11763.1	114.15	129.3	161.9	49.33	146.2	5.6	32	0.83	143	3.7	120	1.35	87	2.25	9.6	139	6.91	2	0	1	109	0	0	3	0	1	1	1	0	10	2	1	0
37513	18	19	17	6.07	114	6.33	7.2	428.3	0.9	79.56	2	49	4	3	0.87	34121.7	78.37	108.7	167.3	38.84	112.7	5.7	48	1.24	173	4.47	118	1.332	101	2.612	105.5	184	57.34	2	0	1	98	1	0	3	0	2	2	2	1	10	2	1	0
41124	18	22	8	2.86	118	6.55	6.8	404.5	0.7	61.88	2	68	4	3	5	12128.4	94.15	78.5	153.2	33.45	105	6.5	61	1.58	199	5.15	88	0.994	120	3.103	3.8	26	14.62	1	0	1	83	1	1	3	0	1	1	1	0	18.51	2	1	1
41983	18	21	9	3.21	76	4.22	3.6	214.1	0.82	72.49	2	71	3	3	1.02	22871.8	76.43	63.3	164.2	23.48	84.8	5	82	2.12	250	6.47	58	0.655	156	4.034	35.7	72	49.58	2	0	1	0	0	0	1	0	2	2	2	1	18.51	2	0	1
392	25	25	21	7.5	86	4.774	6.6	392.6	0.6	53	1	77	1	1	1.49	1409.3	99.42	62.8	156.7	25.58	95	5.5	35	0.91	194	5.02	108	1.22	137	3.54	11.8	152	7.76	1	0	1	74	0	0	2	0	1	1	1	0	30	3	0	0
58688	18	25	11	3.93	81	4.5	5.3	315.2	0.69	61	2	73	2	1	0.64	11105.6	91.58	55.4	150.2	24.56	93.3	5.6	45	1.16	232	6	163	1.84	154	3.982	12.9	62	20.81	1	0	1	77	0	0	1	1	1	1	1	0	30	3	1	0
30722	17	23	21	7.5	118	6.55	4.1	243.9	1.1	97.24	2	85	1	1	0.76	5179.16	49.24	72.3	147	33.46	98.5	5.8	40	1.03	186	4.81	220	2.484	102	2.638	12.4	86	14.42	1	0	1	76	1	0	3	1	1	2	3	1	30	3	1	0
21666	15	12	10	3.57	102	5.66	4.5	267.7	0.7	61.88	2	66	4	3	3.01	13797.9	95.32	77.2	160.1	30.12	92.5	6.2	44	1.14	263	6.8	124	1.4	194	5.017	19.3	62	31.13	2	0	1	59	1	0	3	0	2	2	1	0	24.8	3	1	0
44508	12	17	15	5.36	160	8.88	8.4	499.6	1.02	90.17	2	80	4	1	1.49	10806.3	55.61	111.9	154.3	47	127.3	7	38	0.98	217	5.61	94	1.061	160	4.138	18.2	23	79.13	2	0	1	79	0	1	3	0	2	3	3	1	27.5	3	1	0
60444	63	55	61	21.78	135	7.49	11.9	707.8	2.38	210.39	2	80	1	1	3	10797.8	20.12	51.1	151.9	22.15	84.3	6.2	63	1.63	188	4.86	142	1.603	97	2.508	850	23	3695.65	1	0	1	69	1	1	1	1	3	4	5	1	21.5	3	0	1
11950	24	28	16	5.71	100	5.551	6.4	380.7	0.9	79.56	2	85	3	1	1.72	8136.72	62.65	69.8	154.6	29.2	106.2	5.7	36	0.93	216	5.59	289	3.26	122	3.15	83.9	213	39.39	2	0	1	74	1	0	2	1	2	2	2	1	27.5	3	1	0
45816	21	24	33	11.78	271	15.04	7.1	422.3	1.42	125.53	2	55	4	4	0.82	23852.2	43.68	138.5	169.8	48.04	136.2	11.1	47	1.22	298	7.71	486	5.487	115	2.97	3210	49	6551.02	1	0	1	93	0	1	3	1	3	4	4	1	24.8	3	1	0
42681	17	19	24	8.57	90	5	5.7	339	2.79	246.64	1	59	4	3	0	23747.3	25.31	93.5	176.3	30.08	103.8	5.7	78	2.02	261	6.75	101	1.14	163	4.215	4220	78	5410.26	2	0	1	89	1	0	3	0	3	4	5	1	18.4	2	1	1
51933	18	19	12	4.28	111	6.16	8.2	487.7	0.79	69.84	1	54	3	3	3.69	99572.4	105.57	95.3	163.1	35.82	115.7	5.3	48	1.24	200	5.17	125	1.411	127	3.284	581	66	880.3	1	0	1	97	1	0	3	0	3	3	1	0	25.3	3	1	1
8189	36	24	16	5.7	99	5.495	4.9	291.5	0.5	44.2	2	60	1	2	1.08	2216.05	107.31	60.1	150.3	26.6	81.2	6	53	1.36	244	6.31	129	1.46	165	4.27	5.5	76	7.24	1	0	1	82	1	0	2	0	1	1	1	0	15.9	2	0	1
60778	27	31	7	2.5	112	6.22	4.2	249.8	0.65	57.46	2	53	4	3	3.69	22553.1	105.21	75.4	168.6	26.53	97.3	6	58	1.5	183	4.73	93	1.05	106	2.741	12.9	164	7.87	1	0	1	94	1	1	2	0	1	1	1	0	18.51	2	1	1
5482	14	15	34	12.1	198	10.991	7.1	422.3	1.5	132.6	1	65	1	1	0.93	1728.78	51.35	88.5	176.9	28.28	104.2	8.5	34	0.89	201	5.2	232	2.62	120	3.1	7770	182	4269.23	1	0	1	100	0	1	2	1	3	4	3	1	30	3	1	0
5195	13	23	13	4.6	107	5.94	4.3	255.8	0.6	53	2	74	1	1	0.85	1581.67	94.13	82.1	163.6	30.67	103	5.9	36	0.94	172	4.45	146	1.65	106	2.74	15.1	24	62.92	1	1	1	88	1	0	3	1	2	2	1	0	27.5	3	1	0
12443	12	16	8	2.86	195	10.824	2.8	166.5	0.5	44.2	2	69	1	4	2.26	1735.18	101.46	48.1	156	19.76	86.3	8.1	81	2.09	211	5.46	136	1.54	103	2.66	13.3	21	63.33	2	0	1	90	0	1	1	1	2	2	1	0	21.5	3	0	1
34726	11	21	17	6.07	84	4.66	6.4	380.7	1.4	123.76	2	67	4	3	1	9807.06	41.23	69.7	156.9	28.31	91.6	5.5	60	1.55	239	6.18	114	1.287	156	4.034	63.3	208	30.43	1	0	1	99	0	0	2	0	2	4	4	1	24.8	3	1	1
22245	8	21	24	8.57	81	4.5	6.7	398.5	1.3	114.92	1	85	1	1	1.79	4264.57	53.83	49.4	164.6	18.23	75.9	5	55	1.42	133	3.44	46	0.519	69	1.784	329	131	251.15	1	0	1	54	0	0	1	0	2	3	3	1	30	3	0	1
49957	19	21	16	5.71	103	5.72	6.8	404.5	1.02	90.17	1	61	3	4	3.65	49593.5	83.62	73.1	171.7	24.8	95.8	5.4	64	1.66	163	4.22	41	0.463	91	2.353	3.1	41	7.56	2	0	1	107	1	0	1	0	1	1	2	0	29.4	3	0	1
8798	16	22	12	4.3	79	4.385	3.4	202.2	0.5	44.2	2	76	3	4	3.07	23390.9	97.14	56.9	166.5	20.53	81	5.2	68	1.76	231	5.97	94	1.06	144	3.72	1.1	12	9.17	2	0	1	77	0	0	1	0	1	1	1	0	18.51	2	0	1
52494	24	23	21	7.5	148	8.22	5.3	315.2	1.42	125.53	2	78	3	5	4.12	37776.8	37.86	50.4	155.1	20.95	88.5	7.4	64	1.66	158	4.09	85	0.96	77	1.991	25.9	17	152.35	2	0	1	64	0	1	1	0	2	4	4	1	27.5	3	1	1
44984	23	25	22	7.85	119	6.61	3.2	190.3	0.72	63.65	2	80	2	3	0.59	10626.1	84.47	45.4	159.7	17.8	76.9	4.6	43	1.11	174	4.5	271	3.06	77	1.991	33.1	68	48.68	1	0	1	56	0	1	1	1	2	2	2	1	30	3	0	0
35528	21	27	9	3.21	123	6.83	6.7	398.5	1	88.4	1	71	3	3	0.52	20334.3	80.47	88.4	189.8	24.54	102.9	5.3	47	1.22	207	5.35	198	2.235	120	3.103	11.7	72	16.25	2	0	1	80	1	0	1	1	1	1	2	0	30	3	1	1
63739	15	25	22	7.85	306	16.99	4.9	291.5	0.98	86.63	2	71	4	2	0.31	12863.4	61.71	50.2	156.8	20.4	81.5	8.1	49	1.27	129	3.34	77	0.869	65	1.681	11	41	26.83	2	0	1	39	0	1	1	0	1	1	2	0	30	3	0	0
23389	13	21	10	3.57	111	6.16	5.3	315.2	0.8	70.72	2	61	4	2	1.38	12864.4	83.78	65	155.4	26.92	83.6	6	54	1.4	175	4.53	170	1.919	87	2.25	8.3	119	6.97	1	0	1	86	1	0	2	1	1	1	2	0	18.51	2	0	1
65473	20	28	13	4.64	97	5.38	5.2	309.3	0.69	61	2	60	4	2	0.81	8308.63	99.29	54.2	162.2	20.6	80.8	5.5	67	1.73	228	5.9	145	1.637	132	3.414	10.8	90	12	1	0	1	103	1	0	1	1	1	1	1	0	15.9	2	0	1
18299	29	21	12	4.28	131	7.272	5.3	315.2	0.6	53.04	2	62	4	3	2.48	6706.48	101.42	82.8	155.6	34.2	104.5	7.4	54	1.4	230	5.95	85	0.96	159	4.11	161.2	170	94.82	2	0	1	104	0	1	3	0	2	2	1	0	18.51	2	1	1
28567	27	28	21	7.5	93	5.16	7.4	440.2	1.3	114.92	1	83	3	3	5	16671.1	54.51	76.7	169.9	26.57	101	5.4	47	1.22	201	5.2	96	1.084	135	3.491	37.1	118	31.44	2	0	1	70	0	0	2	0	2	3	3	1	30	3	0	1
30707	24	25	14	5	80	4.44	4.7	279.6	1.2	106.08	2	49	4	2	1.86	26034.7	55.49	72.4	156.8	29.45	96.4	5.5	34	0.88	194	5.02	139	1.569	132	3.414	9.1	61	14.92	2	0	1	93	0	0	2	1	1	2	3	1	10	2	1	0
15279	21	19	18	6.43	149	8.271	8	475.8	1.3	114.92	1	72	3	2	3.49	20307.1	58.37	97	185.6	28.16	116.6	5.8	34	0.88	178	4.6	136	1.54	117	3.03	6.3	140	4.5	2	0	1	90	1	1	2	1	1	2	3	1	30	3	1	0
34782	19	24	22	7.85	155	8.6	6.4	380.7	1	88.4	2	85	3	2	1.12	31854.9	55.21	79.5	161.4	30.52	99.5	6.5	40	1.03	216	5.59	387	4.369	99	2.56	163.7	140	116.93	1	0	1	59	0	1	3	1	2	3	3	1	27.5	3	1	0
37303	16	22	11	3.93	112	6.22	7.8	463.9	1.6	141.44	1	66	4	2	1.18	9714.12	47.22	98.5	181.9	29.77	110.8	5.9	71	1.84	138	3.57	59	0.666	55	1.422	234.5	378	62.04	2	1	1	70	1	0	2	0	2	3	3	1	30	3	1	1
32497	12	20	33	11.78	78	4.33	5.8	345	1.9	167.96	2	74	3	3	1.22	36696.7	27.37	62.7	158.7	24.9	96.8	5.6	55	1.42	181	4.68	87	0.982	109	2.819	22.7	69	32.9	1	0	1	76	0	0	1	0	2	4	5	1	24.8	3	1	1
2094	22	19	21	7.5	246	13.655	5.1	303.3	0.6	53	2	61	5	2	1.88	8703.5	102.06	74.3	149.1	33.42	111.3	12.4	54	1.39	330	8.53	284	3.21	219	5.66	45.8	151	30.33	2	0	1	45	0	1	3	1	2	2	1	0	30	3	1	1
27579	19	19	26	9.28	78	4.33	4.7	279.6	1.1	97.24	2	85	3	5	5	17466.1	49.24	49.8	155.1	20.7	75	5.5	111	2.87	308	7.96	79	0.892	181	4.681	7	53	13.21	2	0	1	0	0	0	1	0	1	2	3	1	30	3	0	1
48335	19	18	19	6.78	90	5	6.2	368.8	1.12	99.01	2	66	3	2	2.42	24081	54.23	67.9	147.7	31.12	99	5.7	44	1.14	255	6.59	220	2.484	167	4.319	7.1	48	14.79	2	0	1	83	1	0	3	1	1	2	3	1	24.8	3	1	0
21504	16	17	9	3.21	103	5.72	7.6	452	0.8	70.72	2	74	5	4	2.3	42614.2	77.27	60.4	158.3	24.1	84.1	6.5	41	1.06	203	5.25	243	2.743	113	2.922	100.7	110	91.55	1	0	1	79	1	1	1	1	2	2	2	1	24.8	3	0	0
12697	12	18	15	5.36	212	11.768	8	475.8	1.2	106.08	1	59	4	2	1.41	12693.7	69.66	77.3	182.1	23.31	95.5	8.3	48	1.24	168	4.34	540	6.1	115	2.97	589.5	295	199.83	2	0	1	100	0	1	1	1	2	2	2	1	25.3	3	0	1
1566	12	11	12	4.3	94	5.218	3.4	202.2	0.6	53	2	71	3	4	0.84	27914.7	95.9	70.4	166.5	25.39	92.2	5.7	59	1.53	216	5.59	126	1.42	115	2.97	10.1	43	23.49	1	1	1	99	1	0	2	0	1	1	1	0	18.51	2	1	1
41158	51	44	13	4.64	107	5.94	7.6	452	0.9	79.56	2	71	3	5	2.46	53574.9	68.35	80.2	163.3	30.07	102.4	5.6	43	1.11	253	6.54	179	2.021	174	4.5	30.8	160	19.25	2	0	1	83	1	0	3	1	1	1	2	0	30	3	1	0
48658	44	57	10	3.57	89	4.94	3.9	232	0.57	50.39	2	80	3	1	0.68	29947.6	91.81	56.5	158.1	22.6	85.8	5.8	47	1.22	135	3.49	69	0.779	74	1.914	48.7	46	105.87	2	0	1	57	1	1	1	0	2	2	1	0	24.8	3	0	0
7393	22	33	7	2.5	88	4.885	6.2	368.8	0.9	79.6	1	56	4	2	1.32	10205.5	100.24	96.6	181.6	29.29	121.2	5.7	69	1.78	186	4.81	85	0.96	100	2.59	81.1	197	41.17	2	0	1	107	1	0	2	0	2	2	1	0	13.3	2	1	1
33338	21	23	12	4.28	88	4.88	2.9	172.5	0.7	61.88	2	85	3	4	1.95	28653.5	84.7	62.3	149.3	27.95	94.5	5.7	64	1.66	233	6.03	144	1.626	140	3.62	7.1	32	22.19	1	0	1	77	1	0	2	1	1	1	2	0	24.8	3	1	1
51783	21	19	16	5.71	328	18.21	5.5	327.1	2.1	185.64	1	42	2	3	0.76	20746.6	39.56	82	172.7	27.49	102.6	11.9	42	1.09	265	6.85	358	4.042	151	3.905	4550	33	13787.9	2	0	1	97	0	1	2	1	3	4	4	1	25.3	3	1	1
18071	19	20	15	5.36	127	7.05	5.3	315.2	1.1	97.24	2	83	3	1	1.05	9147.26	49.86	57.4	152.1	24.81	99.6	5.8	51	1.32	192	4.97	130	1.47	115	2.97	25.8	151	17.09	1	0	1	65	1	1	1	0	1	2	3	1	24.8	3	1	1
52619	17	25	23	8.21	110	6.11	4.8	285.5	1.06	93.7	1	78	3	4	2.61	10077.3	71.83	102.5	177.4	32.57	129.4	5.8	58	1.5	232	6	39	0.44	166	4.293	159	159	100	2	1	1	93	1	0	3	0	2	2	2	1	30	3	1	1
8489	15	16	12	4.3	230	12.767	4.2	249.8	0.7	61.9	1	75	1	1	1.07	2297.89	96.09	69.9	164.9	25.71	95.7	10.3	47	1.21	241	6.23	494	5.58	115	2.97	12810	77	16636.4	2	1	1	72	0	1	2	1	3	3	1	0	30	3	0	1
21530	14	18	17	6.07	91	5.05	5.2	309.3	1.1	97.24	2	85	3	2	1.89	17466.1	49.24	68.5	159.3	26.99	97.5	5.6	87	2.25	306	7.91	304	3.432	158	4.086	9	31	29.03	2	1	1	73	0	0	2	1	1	2	3	1	30	3	1	1
46236	14	24	11	3.93	102	5.66	5	297.4	0.92	81.33	2	80	5	1	1.17	13104.9	62.94	59.7	147	27.63	92.7	5.5	45	1.16	308	7.96	217	2.45	220	5.689	24.3	51	47.65	1	0	1	0	1	0	2	1	2	2	2	1	30	3	1	0
12512	13	22	13	4.64	99	5.495	6.7	398.5	0.9	79.56	2	83	3	4	4.51	8281.13	63.43	51.2	163.3	19.2	71.3	5.4	104	2.69	224	5.79	89	1	102	2.64	21	53	39.62	2	1	1	67	1	0	1	0	2	2	2	1	30	3	0	1
8727	12	20	14	5	95	5.273	5	297.4	0.8	70.7	1	81	1	1	2.21	2344.67	88.91	101.3	175.9	32.74	108.2	4.9	51	1.31	191	4.94	132	1.49	114	2.95	51.6	81	63.7	1	0	1	87	0	0	3	0	2	2	2	1	30	3	1	1
2830	11	20	14	5	130	7.216	5.6	333.1	0.9	79.6	2	66	4	3	1.92	5994.55	70.51	58.9	152.9	25.19	80.9	6.1	65	1.67	147	3.8	57	0.64	115	2.97	88.7	26	341.15	1	0	1	65	1	1	2	0	3	3	2	1	10	2	0	1
6051	24	23	10	3.6	94	5.218	6	356.9	0.8	70.7	1	65	4	4	0.28	4542.87	98.21	71.7	160.6	27.8	90	5.9	52	1.34	179	4.63	54	0.61	117	3.03	4	46	8.7	2	0	1	0	1	1	2	0	1	1	1	0	29.4	3	0	1
16927	20	24	12	4.28	86	4.774	3.3	196.3	0.9	79.56	1	49	4	3	2.28	15434.8	104.7	63.4	177.3	20.17	75.2	4.7	76	1.97	194	5.02	60	0.68	106	2.74	16.6	173	9.6	2	0	1	107	0	0	1	0	1	1	1	0	21.6	3	0	1
13490	19	24	17	6.07	93	5.162	5.3	315.2	1.4	123.76	1	71	4	5	5	5187.82	53.73	79.6	175.5	25.84	91.8	5.3	59	1.53	149	3.85	49	0.55	80	2.07	2.9	138	2.1	1	1	1	69	0	0	2	0	1	2	3	1	30	3	0	1
28414	18	16	15	5.36	84	4.66	6.8	404.5	1.4	123.76	1	51	4	4	5	24958.5	60.85	87.9	179.4	27.31	97.2	5.4	53	1.37	180	4.65	108	1.219	105	2.715	535	180	297.22	2	0	1	97	0	0	2	0	2	2	2	1	29.4	3	0	1
386	13	19	27	9.6	91	5.051	4.7	279.6	0.8	70.7	2	85	3	3	2.38	9397.11	72.16	69.1	160.7	26.76	104.6	5.8	70	1.81	276	7.14	117	1.32	183	4.73	24	87	27.59	2	0	1	81	1	0	2	0	1	1	2	0	21.5	3	1	1
36112	23	20	15	5.36	77	4.27	6.5	386.6	0.9	79.56	2	74	3	3	1.55	43428.2	67.08	83.2	162.2	31.62	114.1	5.6	54	1.4	211	5.46	282	3.184	101	2.612	11.1	76	14.61	1	0	1	90	0	1	3	1	1	1	2	0	30	3	1	1
45883	23	25	13	4.64	100	5.55	5.8	345	0.72	63.65	1	65	2	3	3.26	6909.24	101.39	64.2	160.1	25.05	95.8	5.5	78	2.02	287	7.42	75	0.847	194	5.017	12.9	230	5.61	2	0	1	41	1	0	2	0	1	1	1	0	29.4	3	0	1
7836	21	23	11	3.9	84	4.663	3.6	214.1	0.5	44.2	2	71	1	1	1.33	1541.12	100.21	79.3	144.9	37.77	102.2	4.9	57	1.48	150	3.88	79	0.89	77	1.99	15.3	101	15.15	1	1	1	73	0	0	3	0	1	1	1	0	18.51	2	1	1
27213	16	17	15	5.36	96	5.33	5.5	327.1	0.9	79.56	2	76	1	3	0.78	5524.43	66.26	80.2	157.3	32.41	98.1	5.5	68	1.76	251	6.49	147	1.66	154	3.982	5.7	120	4.75	1	0	1	80	0	0	3	1	1	1	2	0	21.5	3	1	1
7184	16	26	14	5	96	5.329	4.9	291.5	0.6	53	2	85	3	2	1.08	9397.11	87.91	47.8	154.9	19.92	71.4	5.5	70	1.82	267	6.9	86	0.97	179	4.63	28.4	78	36.41	1	0	1	63	0	0	1	0	2	2	2	1	27.5	3	0	1
46315	14	18	19	6.78	112	6.22	5.2	309.3	0.92	81.33	2	76	3	4	2.16	38696.1	64.53	84.8	161.4	32.55	110.5	7.3	58	1.5	158	4.09	187	2.111	63	1.629	17	146	11.64	1	0	1	95	1	1	3	1	1	1	2	1	21.5	3	1	1
33979	13	17	8	2.86	93	5.16	5.6	333.1	1.1	97.24	1	83	4	2	0.63	10740.7	66.61	55.8	164.3	20.67	81.5	5.6	53	1.37	237	6.13	124	1.4	159	4.112	9.2	91	10.11	1	0	1	49	0	0	1	0	1	1	2	0	30	3	0	1
24768	19	25	13	4.64	110	6.11	5.5	327.1	1.2	106.08	1	70	1	1	2.4	3012.57	65.06	83.6	174.3	27.52	108.6	5.6	50	1.29	172	4.45	206	2.326	81	2.095	5170	224	2308.04	1	1	1	69	1	0	2	1	3	3	2	1	30	3	1	1
46180	61	67	10	3.57	141	7.83	3.5	208.2	0.52	45.97	2	50	1	4	1.46	16008.8	113.12	101.6	160.8	39.29	118.6	7.2	47	1.22	171	4.42	144	1.626	95	2.457	17.6	62	28.39	2	0	1	103	0	1	3	1	1	1	1	0	15.9	2	1	0
60628	57	41	8	2.86	108	6	7.5	446.1	0.95	83.98	1	60	1	5	4.46	7492.22	91.63	126.5	177.1	40.33	127.5	5.8	48	1.24	194	5.02	123	1.389	121	3.129	738	74	997.3	2	0	1	111	1	0	3	0	3	3	1	0	30	3	1	1
6642	24	27	14	5	91	5.051	5.7	339	0.7	61.9	1	75	3	4	2.67	17539.7	96.09	84.44	174.3	27.79	106.6	5.3	57	1.47	172	4.45	56	0.63	104	2.69	15.2	106	14.34	2	1	1	85	0	0	2	0	1	1	1	0	30	3	1	1
22231	23	29	21	7.5	86	4.77	5.4	321.2	1.3	114.92	1	80	3	4	1.49	16671.1	55.53	77.3	172.2	26.07	103.7	5.3	43	1.11	255	6.59	191	2.156	174	4.5	52.7	127	41.5	2	1	1	62	0	0	2	1	2	3	3	1	30	3	1	1
25529	21	22	22	7.85	97	5.38	7.4	440.2	1.2	106.08	1	75	3	4	5	36125	63.06	90.4	176.6	28.99	103.5	5.2	31	0.8	191	4.94	131	1.479	134	3.465	26.5	92	28.8	1	1	1	69	0	0	2	0	1	1	2	0	30	3	1	0
393	19	26	9	3.2	118	6.55	2.9	172.5	0.5	44.2	2	76	1	1	1	1603.73	97.14	63.4	145.1	30.11	92.4	5.9	36	0.93	207	5.35	271	3.06	117	3.03	8.2	24	34.17	1	0	1	67	1	0	3	1	2	2	1	0	30	3	1	0
46822	19	17	44	15.71	97	5.38	9.6	571	1.72	152.05	2	80	3	3	2.12	27520.3	29.71	68.7	155.8	28.3	105	6	38	0.98	112	2.9	93	1.05	55	1.422	513	72	712.5	1	1	1	54	1	1	2	0	3	4	5	1	30	3	1	0
12708	15	22	19	6.78	97	5.384	6	356.9	1	88.4	2	85	3	2	2.17	9170.71	55.21	74.3	166.3	26.87	111.3	5.5	53	1.37	145	3.75	141	1.59	64	1.66	6.9	29	23.79	1	0	1	87	1	0	2	1	1	2	3	1	21.5	3	1	1
11711	14	19	19	6.78	85	4.718	5.6	333.1	1.1	97.24	1	74	3	5	4.02	14905.5	70.44	60.6	152.8	25.96	96.9	5.4	42	1.09	168	4.34	99	1.12	106	2.74	31.6	98	32.24	2	0	1	79	0	0	2	0	2	2	2	1	30	3	0	1
16075	14	27	17	6.07	71	3.941	7.1	422.3	1	88.4	2	63	4	2	0.29	4618.81	63.3	49.4	158.5	19.66	69.8	5.5	82	2.12	192	4.97	66	0.75	97	2.51	294	160	183.75	2	0	1	91	0	0	1	0	2	2	2	1	21.5	3	0	1
30641	12	17	12	4.28	87	4.83	3.9	232	0.6	53.04	2	57	1	1	1.36	27335	104.63	60.2	154.7	25.15	94.2	5.2	82	2.12	230	5.95	172	1.942	114	2.948	2.2	27	8.15	2	0	1	90	0	0	2	1	1	1	1	0	10	2	1	1
39433	149	110	22	7.85	238	13.21	5.8	345	1.5	132.6	2	80	3	3	1.21	28238.1	35.01	83.8	159.5	32.94	113	8.7	47	1.22	169	4.37	114	1.287	99	2.56	21.1	89	23.71	1	0	1	59	0	1	3	0	1	3	4	1	27.5	3	1	0
56264	34	33	16	5.71	86	4.77	5.9	350.9	0.91	80.44	1	56	4	4	1.02	24699.8	98.92	77	172.5	25.88	90.2	5.8	40	1.03	150	3.88	83	0.937	93	2.405	13.5	160	8.44	1	0	1	112	1	0	2	0	1	1	1	0	30	3	0	1
39842	29	26	16	5.71	92	5.11	6.9	410.4	0.9	79.56	1	71	3	5	5	41236.4	91.31	106.1	183.9	31.37	114.7	5.6	66	1.71	263	6.8	257	2.902	146	3.776	10.6	39	27.18	2	0	1	83	0	0	3	1	1	1	1	0	30	3	1	1
43558	18	36	24	8.57	112	6.22	6.7	398.5	1.07	94.59	1	69	3	5	5	47908.5	75.12	79.9	181.9	24.15	108.5	6	58	1.5	138	3.57	51	0.576	70	1.81	925.5	78	1186.54	2	0	1	103	1	1	1	0	3	3	2	1	30	3	1	1
9090	18	21	12	4.3	96	5.329	4.2	249.8	0.4	35.4	2	81	3	4	2.89	11346.2	99.37	58.3	164.4	21.57	87.5	5.6	55	1.42	219	5.66	106	1.2	143	3.7	9.9	26	38.08	2	0	1	84	1	0	1	0	2	2	1	0	30	3	0	1
16093	14	20	18	6.43	84	4.663	6	356.9	0.7	61.88	2	82	3	3	1.24	9563.01	86.3	62.7	151.9	27.17	94.5	5.4	55	1.42	205	5.3	163	1.84	115	2.97	16.5	55	30	2	0	1	74	0	0	2	1	2	2	2	1	27.5	3	1	1
1574	10	20	17	6.1	81	4.496	3.3	196.3	0.6	53	2	80	3	4	2.83	8662.12	90.68	51.4	145.7	24.21	88.2	5	39	1.01	254	6.57	210	2.37	173	4.47	21.2	94	22.55	2	0	1	80	0	0	1	1	1	1	1	0	30	3	1	0
8548	8	14	21	7.5	103	5.718	9.9	588.9	2.2	194.5	1	81	4	1	3.47	4928.44	29.36	75.2	171.9	25.45	101.6	5.1	47	1.22	215	5.56	112	1.26	145	3.75	1610	131	1229.01	1	0	1	79	1	0	2	0	3	4	5	1	30	3	0	1
43330	45	52	19	6.78	202	11.21	5.5	327.1	0.9	79.56	2	72	3	1	1.14	26343.2	67.92	102.9	161.5	39.45	125.9	7.6	52	1.34	175	4.53	157	1.773	92	2.379	10.9	153	7.12	1	0	1	47	0	1	3	1	1	1	2	0	30	3	1	1
47511	29	25	18	6.43	94	5.22	6.3	374.7	1	88.4	1	71	3	1	0.71	9935.27	80.47	89.1	173.5	29.6	115.6	5.6	44	1.14	157	4.06	172	1.942	79	2.043	23.1	105	22	1	1	1	72	1	0	2	1	1	1	2	0	30	3	1	1
7230	27	24	15	5.4	193	10.713	7.4	440.2	0.8	70.7	1	66	1	1	1.17	1374.18	97.6	91.8	157.6	36.96	115.6	6.9	26	0.68	198	5.12	195	2.2	115	2.97	853	91	937.36	2	1	1	84	0	1	3	1	3	3	1	0	30	3	1	0
11747	21	26	17	6.07	84	4.663	5.8	345	0.9	79.56	1	77	1	1	1.04	1427.03	87.97	75.5	162.7	28.52	104.4	5.2	56	1.45	122	3.15	102	1.15	46	1.19	7.4	53	13.96	2	0	1	80	0	0	2	0	1	1	2	0	30	3	1	1
17224	21	28	15	5.36	90	4.996	6	356.9	1	88.4	1	83	3	1	0.77	4539.25	74.68	56.6	168.9	19.84	79	5.5	32	0.83	182	4.71	323	3.65	85	2.2	29.6	77	38.44	1	0	1	83	0	1	1	1	2	2	2	1	30	3	0	0
44249	20	22	12	4.28	172	9.55	7.3	434.2	0.98	86.63	1	57	2	1	1.96	10271.1	89.94	83.8	170.8	28.73	103.5	7.6	35	0.91	114	2.95	100	1.129	59	1.526	52.6	87	60.46	2	0	1	92	0	1	2	0	2	2	2	1	30	3	1	0
26966	19	25	11	3.93	120	6.66	5.1	303.3	0.9	79.56	2	85	3	4	2.12	17466.1	62.65	44.2	154	18.64	72.3	6	75	1.94	307	7.94	176	1.987	197	5.094	9.7	80	12.13	2	0	1	62	1	0	1	1	1	1	2	0	24.8	3	0	1
14237	18	27	11	3.93	94	5.218	3.2	190.3	0.6	53.04	2	84	2	4	3.21	7244.08	88.45	50.3	157.1	20.38	82.3	5.3	74	1.91	196	5.07	56	0.63	111	2.87	15.2	32	47.5	1	0	1	49	0	0	1	0	2	2	2	1	15.9	2	0	1
18223	18	24	12	4.28	98	5.44	4.1	243.9	0.8	70.72	2	77	3	4	5	23779.6	75.84	76.1	160.8	29.43	99.9	5.5	71	1.84	178	4.6	82	0.93	91	2.35	5.9	96	6.15	1	0	1	76	0	0	2	0	1	1	2	0	15.9	2	1	1
46076	18	22	28	10	160	8.88	5.3	315.2	0.96	84.86	2	80	3	3	5	27006.6	59.81	54.7	150.4	24.18	87.8	7.9	56	1.45	159	4.11	155	1.75	72	1.862	158	49	322.45	1	0	1	59	0	1	1	1	3	4	3	1	24.8	3	0	1
3450	17	20	18	6.4	138	7.66	5.1	303.3	1.1	97.2	2	85	1	1	0.69	1266.59	49.24	49.54	138.4	25.86	95.8	6.9	46	1.2	160	4.14	105	1.19	115	2.97	250	70	357.14	1	1	1	65	0	1	2	0	3	4	3	1	27.5	3	1	0
42814	17	24	19	6.78	97	5.38	7.6	452	1.12	99.01	2	80	4	3	2.07	12905.1	49.71	82.3	159.6	32.31	101.2	5.4	83	2.15	211	5.46	87	0.982	111	2.87	919	53	1733.96	1	1	1	69	1	0	3	0	3	4	3	1	24.8	3	1	1
18413	16	20	40	14.28	122	6.772	6.9	410.4	2.3	203.32	1	71	3	4	4.27	18124.2	29.62	76.5	176.3	24.61	95.6	5.9	39	1.01	138	3.57	177	2	64	1.66	13.1	151	8.68	1	1	1	81	1	1	1	1	1	4	5	1	30	3	0	0
21868	16	18	12	4.28	72	4	6.1	362.8	0.7	61.88	2	58	3	5	2.89	78418.9	100.19	64.8	161.3	24.91	90.4	5.5	76	1.97	221	5.72	235	2.653	98	2.534	3.5	26	13.46	2	0	1	0	0	0	1	1	1	1	1	0	21.5	3	1	1
875	16	17	25	8.9	101	5.607	4.3	255.8	0.6	53	2	74	1	1	0.08	1956.1	94.13	78.3	148.7	35.41	118	6	61	1.59	261	6.75	181	2.04	163	4.22	35.9	214	16.78	2	0	1	92	1	0	3	1	1	1	1	0	21.5	3	1	1
57732	15	43	13	4.64	92	5.11	5.5	327.1	1.17	103.43	1	48	3	2	0.65	15802.7	76.9	82.7	174	27.32	98.6	5.6	19	0.49	309	7.99	816	9.213	115	2.97	8.8	31	28.39	1	1	1	88	0	0	2	1	1	1	2	0	30	3	0	0
12874	14	21	16	5.71	91	5.051	4.7	279.6	1	88.4	2	85	3	4	5	9718.24	55.21	62.9	153.2	26.8	98.2	5.5	43	1.11	257	6.65	136	1.54	187	4.84	22	57	38.6	1	0	1	85	0	0	2	1	2	3	3	1	30	3	1	0
13385	13	14	10	3.57	174	9.659	2.9	172.5	0.5	44.2	2	63	1	1	0.73	2987.74	105.32	61.5	144.4	29.49	101.4	8.1	60	1.55	209	5.4	111	1.25	127	3.28	36.4	74	49.19	2	0	1	93	0	1	2	0	2	2	1	0	27.5	3	1	1
26974	31	23	8	2.86	149	8.27	5.7	339	0.7	61.88	2	49	4	4	2.42	29974.8	105.95	104	163.5	38.9	116.7	6.2	48	1.24	154	3.98	178	2.01	70	1.81	90.9	81	112.22	2	0	1	73	1	1	3	1	2	2	1	0	7.3	1	1	0
4261	26	32	25	8.9	222	12.323	6.3	374.7	1	88.4	1	72	1	1	0.96	1298.17	79.97	66.5	161.2	25.59	93.6	7.6	45	1.16	235	6.08	220	2.48	115	2.97	650	165	393.94	1	1	1	59	0	1	2	1	3	3	2	1	30	3	0	1
30929	22	28	16	5.71	199	11.05	4.8	285.5	0.7	61.88	2	57	5	2	1.61	85932.6	100.81	48.6	151.7	21.12	77.6	8.2	84	2.17	302	7.81	297	3.353	159	4.112	41.1	68	60.44	1	1	1	76	0	1	1	1	2	2	1	0	18.51	2	0	1
48191	21	17	18	6.43	98	5.44	4.8	285.5	0.8	70.72	2	48	1	4	4.62	22403.1	90.83	101.8	161.7	38.93	120.7	5.8	45	1.16	209	5.4	141	1.592	136	3.517	323	95	340	2	0	1	91	1	0	3	1	3	3	1	0	21.5	3	1	0
45447	20	23	12	4.28	120	6.66	4.5	267.7	0.82	72.49	2	75	3	1	1.46	20747.6	74.55	69.8	151.6	30.37	102.9	5.6	84	2.17	199	5.15	105	1.185	94	2.431	13.2	27	48.89	1	0	1	65	1	0	3	0	2	2	2	1	21.5	3	1	1
15874	18	33	11	3.93	80	4.441	4.2	249.8	0.8	70.72	2	68	3	4	5	21210.5	80.21	52.5	155	21.85	73.1	4.9	114	2.95	282	7.29	112	1.26	146	3.78	31.3	23	136.09	2	0	1	89	0	0	1	0	2	2	2	1	30	3	0	1
3930	18	21	18	6.4	122	6.772	7.6	452	1	88.4	2	70	4	5	2.69	5844.41	60.61	102.8	165.9	37.35	118.7	6.9	32	0.83	176	4.55	250	2.82	94	2.43	3.3	150	2.2	1	0	1	81	0	1	3	1	1	1	2	0	30	3	1	0
7134	18	19	53	18.9	97	5.384	9.7	577	2.4	212.2	2	72	1	1	0.09	2138.31	20.93	62.7	139.4	32.27	99	8.3	51	1.31	174	4.5	172	1.94	89	2.3	212	41	517.07	1	0	1	69	0	1	3	1	3	4	5	1	30	3	1	1
57335	13	20	19	6.78	84	4.66	5.4	321.2	0.81	71.6	2	58	1	3	2.7	11495	84.09	62.3	156.6	25.4	95.5	5.3	75	1.94	231	5.97	100	1.129	136	3.517	6.4	73	8.77	1	0	1	99	0	0	2	0	1	1	2	0	13.7	2	1	1
3117	38	57	12	4.3	85	4.718	5.9	350.9	0.9	79.6	1	37	4	3	0.85	13366.3	112.81	105	185.9	30.38	97.8	4.5	61	1.59	234	6.05	55	0.62	162	4.19	16.2	271	5.98	1	0	1	107	0	0	3	0	1	1	1	0	9.4	1	0	1
15179	28	25	13	4.64	124	6.883	4.3	255.8	0.7	61.88	2	80	3	3	2.03	8136.72	87.38	69.2	159	27.37	93.3	5.8	61	1.58	210	5.43	169	1.91	115	2.97	20.8	35	59.43	1	0	1	89	1	1	2	1	2	2	2	1	27.5	3	1	1
19993	24	22	10	3.57	97	5.384	4.6	273.6	0.8	70.72	2	77	3	3	1.28	19145.2	75.84	73.5	156.7	29.93	104	5.8	68	1.76	145	3.75	35	0.4	70	1.81	6	35	17.14	1	0	1	60	1	0	2	0	1	1	2	0	13.7	2	1	1
33796	23	27	13	4.64	91	5.05	5.7	339	0.9	79.56	2	81	3	4	2.04	33575.5	64.23	68.2	156.1	27.99	102.8	5.7	88	2.28	249	6.44	117	1.321	138	3.569	18.4	103	17.86	1	0	1	57	1	0	2	0	1	1	2	0	27.5	3	1	1
14578	22	19	18	6.43	97	5.384	5.1	303.3	0.8	70.72	2	72	1	3	5	1821.37	78.24	63.6	154.7	26.58	94	5.1	53	1.37	289	7.47	475	5.36	115	2.97	8	93	8.6	2	0	1	79	1	0	2	1	1	1	2	0	30	3	1	1
22668	19	24	17	6.07	98	5.44	7.8	463.9	1.5	132.6	1	85	3	5	2.81	18611.9	45.34	68	170.6	23.36	91.4	5.3	69	1.78	144	3.72	60	0.677	63	1.629	8.7	80	10.88	2	1	1	84	0	0	1	0	1	2	3	1	30	3	0	1
7537	19	16	13	4.6	92	5.107	6.3	374.7	0.6	53	2	71	3	3	3.17	23390.9	95.9	75.9	158.4	30.25	104.7	5.8	43	1.12	252	6.52	212	2.39	166	4.29	2.6	56	4.64	2	1	1	65	1	0	3	1	1	1	1	0	30	3	1	0
58651	18	21	18	6.43	91	5.05	6.3	374.7	1.61	142.32	1	80	2	3	2.1	13703.9	42.96	69.6	162.4	26.39	106.9	5.8	38	0.98	180	4.65	162	1.829	110	2.845	36.4	126	28.89	2	0	1	61	1	0	2	1	1	3	4	1	30	3	1	0
34042	17	21	15	5.36	82	4.55	6.4	380.7	0.8	70.72	2	54	4	4	0.52	27793.8	87.5	68	159.6	26.7	90.9	5.7	88	2.28	301	7.78	168	1.897	179	4.629	25.1	68	36.91	1	0	1	99	1	0	2	1	2	2	2	1	11.7	2	1	1
16000	16	22	17	6.07	111	6.162	4.8	285.5	0.8	70.72	2	72	3	5	2.09	27393.2	78.24	70.4	152.7	30.19	98.9	5.4	56	1.45	216	5.59	74	0.84	145	3.75	10.2	198	5.15	1	0	1	82	1	0	3	0	1	1	2	0	18.51	2	1	1
7898	15	19	13	4.6	102	5.662	3.8	226	0.5	44.2	2	84	3	3	0.96	9397.11	92.43	60.9	152.5	26.19	84.5	5.6	67	1.72	267	6.9	181	2.04	164	4.24	4.7	29	16.21	1	0	1	71	1	0	2	1	1	1	1	0	30	3	0	1
20303	14	19	8	2.86	84	4.663	3.1	184.4	0.7	61.88	2	62	3	2	1.02	16820.7	97.73	51.9	162.8	19.58	78.9	5.5	69	1.78	226	5.84	90	1.02	139	3.59	3.7	44	8.41	1	0	1	103	0	0	1	0	1	1	1	0	18.51	2	0	1
46363	13	25	63	22.49	89	4.94	5.5	327.1	8.32	735.49	2	63	3	3	1.08	24774.2	4.98	62.2	169.8	21.57	88.8	4.5	103	2.66	239	6.18	83	0.937	119	3.077	873	40	2182.5	2	0	1	82	0	0	1	0	3	4	6	1	24.8	3	1	1
16736	64	57	18	6.43	94	5.218	3.8	226	0.8	70.72	2	85	3	4	1.54	10069.4	72.16	50.9	154.6	21.3	76.5	5.7	62	1.6	150	3.88	71	0.8	74	1.91	14.1	70	20.14	1	0	1	86	1	0	1	0	1	1	2	0	30	3	0	1
21682	23	20	10	3.57	118	6.55	4.4	261.7	1	88.4	1	70	1	1	0.7	6254.7	80.97	71.7	165.5	26.18	93.5	7.7	43	1.11	213	5.51	225	2.54	125	3.233	58.3	138	42.25	2	0	1	64	1	1	2	1	2	2	2	1	30	3	0	1
52971	19	27	23	8.21	94	5.22	8.8	523.4	1.64	144.98	1	80	3	4	3.6	23504	42.02	75.4	167.1	27	100.8	5.8	40	1.03	200	5.17	146	1.648	131	3.388	14.6	89	16.4	2	1	1	73	1	0	2	1	1	3	4	1	30	3	0	1
1903	17	25	27	9.6	95	5.273	4.4	261.7	1.3	114.9	1	85	3	3	2.54	5911.18	53.83	74.6	170.5	25.66	103.1	5.3	68	1.76	226	5.84	78	0.88	142	3.67	1482	124	1195.16	2	0	1	79	0	0	2	0	3	4	3	1	30	3	1	1
5472	17	24	21	7.5	80	4.441	6.8	404.5	0.9	79.6	1	61	3	2	3.6	27975.8	97.17	89.4	169.9	30.97	113.9	5.3	54	1.39	199	5.15	62	0.7	133	3.44	19.1	159	12.01	1	0	1	82	0	0	3	0	1	1	1	0	25.3	3	1	1
43852	13	18	10	3.57	264	14.65	6.2	368.8	0.72	63.65	2	52	4	2	0.52	20683.8	100.54	144.5	169.2	50.47	127.2	9.9	44	1.14	183	4.73	148	1.671	109	2.819	975	80	1218.75	1	0	1	106	0	1	3	1	3	3	1	0	15.9	2	1	0
50015	52	37	15	5.36	126	6.99	5	297.4	1.02	90.17	1	62	3	1	5	49593.5	83.1	99.7	173.8	33.01	116.7	5.2	33	0.85	130	3.36	190	2.145	59	1.526	35.1	98	35.82	1	0	1	94	0	1	3	1	2	2	2	1	25.3	3	1	0
40933	44	26	5	1.79	122	6.77	6.5	386.6	0.8	70.72	1	52	1	5	3.13	18144	106.48	75.1	170.8	25.74	95.3	4.4	21	0.54	106	2.74	211	2.382	43	1.112	25.3	150	16.87	2	0	1	91	0	1	2	1	1	1	1	0	29.4	3	0	0
3559	42	33	10	3.6	117	6.495	8.2	487.7	0.8	70.7	1	60	1	1	0.69	1032.92	101.32	93.64	165.1	34.35	117.7	5.8	48	1.25	202	5.22	78	0.88	138	3.57	36.4	118	30.85	2	0	1	84	1	0	3	0	2	2	1	0	25.3	3	1	1
12	35	17	20	7.1	75	4.163	5.7	339	1	88.4	1	37	3	4	4.93	43328.3	99.41	99.2	180	30.62	112.8	5.2	38	0.98	156	4.03	146	1.65	89	2.3	34.3	99	34.65	2	0	1	102	0	0	3	1	2	2	1	0	6.7	1	1	0
13510	30	43	14	5	290	16.098	11	654.3	0.5	44.2	2	68	3	2	3.88	23500.6	102.1	69.4	155.4	28.74	99.7	7.3	41	1.06	191	4.94	275	3.1	115	2.97	5.3	16	33.13	2	0	1	83	0	1	2	1	2	2	1	0	24.8	3	1	0
48076	27	38	14	5	95	5.27	7.6	452	1.02	90.17	1	70	3	4	4.67	30052.8	79.07	80.9	166.6	29.15	107	5.5	58	1.5	182	4.71	78	0.881	108	2.793	7.3	104	7.02	2	0	1	95	1	0	2	0	1	1	2	0	30	3	1	1
63632	25	42	19	6.78	111	6.16	6.5	386.6	0.93	82.21	2	80	3	3	2.72	65892	62.13	58.9	155.8	24.3	86	5.8	58	1.5	149	3.85	78	0.881	75	1.94	1040	113	920.35	1	1	1	90	1	0	1	0	3	3	2	1	21.5	3	0	1
5842	24	29	10	3.6	96	5.329	3.6	214.1	0.5	44.2	2	60	3	2	2.14	19346	107.31	51.9	150.1	23.04	76.7	5.4	62	1.59	225	5.82	123	1.39	139	3.59	0.7	23	3.04	2	0	1	88	1	0	1	0	1	1	1	0	27.5	3	0	1
1505	21	24	20	7.1	112	6.217	7.5	446.1	0.9	79.6	1	80	3	3	1.24	7193.92	86.34	74.4	164.3	27.56	98.6	5.7	32	0.83	197	5.09	256	2.89	114	2.95	15.7	94	16.7	1	1	1	67	1	0	2	1	1	1	2	0	30	3	0	0
49086	21	22	23	8.21	244	13.54	5.3	315.2	1.02	90.17	1	79	1	1	1.37	6078.55	74.76	67.2	169.7	23.33	91.3	7.3	85	2.2	182	4.71	56	0.632	86	2.224	238	57	417.54	1	0	1	67	0	1	1	0	3	3	2	1	29.4	3	0	1
28787	20	23	11	3.93	105	5.83	6.5	386.6	0.9	79.56	1	79	2	1	0.69	11010.4	86.88	72.7	160.2	28.33	102.5	6.4	48	1.24	235	6.08	153	1.727	156	4.034	7.2	92	7.83	2	0	1	93	1	0	2	1	1	1	2	0	30	3	1	1
51856	20	24	16	5.71	87	4.83	3.4	202.2	0.58	51.27	2	61	2	2	5	5133.48	102.89	61.8	147.6	28.37	88.2	5.4	64	1.66	282	7.29	224	2.529	173	4.474	34.2	172	19.88	2	0	1	29	0	0	2	1	1	1	1	0	24.8	3	1	1
25264	19	20	37	13.21	101	5.61	8.8	523.4	1.7	150.28	1	85	3	5	3.44	18611.9	39.02	88.4	170.5	30.41	111.6	5.9	42	1.09	248	6.41	229	2.585	160	4.138	12.8	106	12.08	1	1	1	68	1	0	3	1	1	3	4	1	30	3	1	1
34715	18	22	13	4.64	110	6.11	6.1	362.8	1	88.4	2	76	3	3	1.88	51091.4	58.39	76.9	157.8	30.88	113.7	5.8	74	1.91	225	5.82	105	1.185	130	3.362	72.1	127	56.77	1	0	1	86	1	0	3	0	2	3	3	1	27.5	3	1	1
9302	18	24	14	5	83	4.607	4.5	267.7	0.8	70.7	2	82	3	3	2.42	7800.09	73.52	59.5	141.2	29.84	94.5	5.1	50	1.28	224	5.79	213	2.4	115	2.97	2.5	37	6.76	1	0	1	73	0	0	2	1	1	1	2	0	24.8	3	1	1
49638	16	28	14	5	115	6.38	5.1	303.3	0.72	63.65	2	73	2	3	5	6340.4	88.23	67.4	159.9	26.36	95	6.4	51	1.32	193	4.99	158	1.784	110	2.845	4	78	5.13	1	0	1	78	1	0	2	1	1	1	2	0	21.5	3	1	1
5432	16	18	13	4.6	110	6.106	4.8	285.5	0.7	61.9	2	71	3	5	1.07	46427	92.41	67.3	162.5	25.49	98.6	5.7	34	0.87	278	7.19	420	4.74	115	2.97	22.1	75	29.47	1	0	1	107	1	0	2	1	1	1	1	1	30	3	1	0
23998	15	22	12	4.28	95	5.27	5.2	309.3	0.9	79.56	2	85	3	3	2.48	18669.2	62.65	75.8	170	26.23	100.9	5.8	63	1.63	220	5.69	137	1.547	130	3.362	4.5	58	7.76	2	0	1	87	1	0	2	1	1	1	2	0	18.51	2	1	1
54637	10	22	18	6.43	89	4.94	8.1	481.8	1.31	115.8	2	80	3	4	1.17	30988.5	41.19	46.4	143.8	22.44	76	5.6	46	1.19	264	6.83	142	1.603	190	4.913	18.4	196	9.39	1	0	1	61	0	0	1	1	1	3	4	1	30	3	0	0
7581	10	19	16	5.7	113	6.273	4.7	279.6	1	88.4	2	84	2	1	1.39	11137.2	55.55	67.7	159.2	26.71	90.9	6	50	1.28	266	6.88	267	3.01	163	4.22	61.5	124	49.6	1	0	1	79	1	0	2	1	2	3	3	1	30	3	1	1
19056	47	49	19	6.78	92	5.107	5.8	345	1.3	114.92	1	63	4	2	2.07	5129.91	61.73	63.8	167.3	22.79	80.3	5.7	74	1.91	222	5.74	106	1.2	127	3.28	347.5	42	827.38	1	0	1	53	1	0	1	0	3	3	2	1	30	3	0	1
51340	23	26	14	5	85	4.72	7.8	463.9	1.19	105.2	1	58	2	1	1.42	11086.9	70.81	85.6	169.8	29.69	106.4	5.8	59	1.53	211	5.46	65	0.734	139	3.595	97.7	174	56.15	2	1	1	107	1	0	2	0	2	2	2	1	30	3	1	1
27730	20	25	16	5.71	90	5	4.9	291.5	0.7	61.88	2	85	3	3	1.13	21972.3	84.7	52.1	150.7	22.94	91.9	5.1	81	2.09	170	4.4	99	1.118	69	1.784	26.2	75	34.93	1	1	1	65	0	0	1	0	2	2	2	1	15.9	2	1	1
55292	20	22	10	3.57	107	5.94	5.2	309.3	0.91	80.44	1	71	3	3	1.73	38549.2	90.11	107.3	165.5	39.17	127.7	5.9	46	1.19	249	6.44	167	1.885	170	4.396	55	127	43.31	2	0	1	89	1	1	3	1	2	2	1	0	30	3	1	1
15617	19	25	11	3.93	132	7.327	4.8	285.5	0.7	61.88	1	55	2	2	1.01	14451.9	108.82	87.6	165.4	32.02	101.4	7.2	62	1.6	177	4.58	85	0.96	98	2.53	240.5	209	115.07	2	0	1	89	0	1	3	0	2	2	1	0	21.6	3	0	1
25469	19	22	12	4.28	91	5.05	4.3	255.8	0.9	79.56	2	79	4	5	5	18455.3	65.03	74.4	153	31.78	107.2	4.9	65	1.68	246	6.36	105	1.185	160	4.138	32.2	80	40.25	2	0	1	60	0	0	3	0	2	2	2	1	30	3	1	1
34913	19	25	16	5.71	86	4.77	4.2	249.8	1	88.4	2	81	3	4	2.05	27055.1	56.6	89.6	165.2	32.83	110.7	5.5	100	2.59	211	5.46	79	0.892	95	2.457	4.6	44	10.45	2	0	1	70	0	0	3	0	1	2	3	1	24.8	3	1	1
42752	19	19	15	5.36	330	18.32	5.4	321.2	0.92	81.33	2	63	4	1	1.39	10599.4	69.96	96.9	162.6	36.65	108	14.4	63	1.63	254	6.57	123	1.389	166	4.293	140	177	79.1	1	1	1	83	0	1	3	0	2	2	2	1	27.5	3	1	1
53935	18	25	8	2.86	99	5.5	5.2	309.3	0.9	79.56	1	61	4	1	2.06	12079.2	97.17	56.9	173.2	18.97	74.4	5.7	104	2.69	225	5.82	37	0.418	114	2.948	4.7	120	3.92	2	0	1	89	1	0	1	0	1	1	1	0	30	3	0	1
23883	17	18	8	2.86	104	5.77	4.9	291.5	1.3	114.92	2	60	4	2	1.28	14544.3	47.08	80.3	162.9	30.26	110.1	5.8	46	1.19	189	4.89	251	2.834	93	2.405	27.3	138	19.78	2	1	1	87	1	1	3	1	1	2	3	1	30	3	1	0
5371	14	18	20	7.1	99	5.495	5.1	303.3	0.9	79.6	2	81	3	2	1.2	9489.63	64.23	71.94	159.4	28.31	103	5.3	44	1.14	270	6.98	247	2.79	176	4.55	18	107	16.82	1	0	1	66	1	0	2	1	1	1	2	0	30	3	1	0
22638	13	16	11	3.93	126	6.99	6.5	386.6	0.8	70.72	2	73	3	4	3.9	48309.6	77.75	73.4	158.9	29.07	102.5	6.3	58	1.5	165	4.27	200	2.258	67	1.733	4.5	69	6.52	1	0	1	52	1	1	2	1	1	1	2	0	24.8	3	1	1
43995	13	22	32	11.42	80	4.44	7.1	422.3	1.82	160.89	2	80	3	2	1.83	37116.2	27.76	72.7	154.3	30.54	107.7	7.8	56	1.45	161	4.16	118	1.332	81	2.095	17.4	38	45.79	1	0	1	55	0	1	3	0	2	4	5	1	24.8	3	1	1
59095	11	17	10	3.57	283	15.71	4.1	243.9	0.84	74.26	1	68	4	3	1.92	9256.57	94.99	68.6	175.3	22.32	86	9.6	38	0.98	181	4.68	101	1.14	123	3.181	8.9	52	17.12	1	0	1	76	0	1	1	0	1	1	1	0	30	3	0	0
52103	42	36	10	3.57	113	6.27	7.6	452	0.84	74.26	1	62	1	1	1.91	5482.66	98.6	85.3	162.6	32.26	108	5.4	66	1.71	205	5.3	101	1.14	119	3.077	546.5	88	621.02	2	0	1	103	1	0	3	0	3	3	1	0	30	3	1	1
6179	36	31	18	6.4	107	5.94	6.1	362.8	1	88.4	1	85	3	4	3.18	7193.92	73.76	70.9	169.4	24.71	102.5	5.6	43	1.12	271	7.01	215	2.43	185	4.78	204.5	72	284.03	2	1	1	89	1	0	1	1	2	2	2	1	30	3	1	1
25657	25	16	20	7.14	124	6.88	5.1	303.3	0.9	79.56	1	69	3	4	1	24331.7	92.45	75.7	173.1	25.26	101	5.7	114	2.95	262	6.78	76	0.858	133	3.439	63.7	109	58.44	2	1	1	85	1	1	2	0	2	2	1	0	30	3	0	1
12511	22	33	15	5.36	100	5.551	6.7	398.5	1	88.4	1	69	3	4	5	19805.4	81.47	92	174.7	30.14	115.7	5.8	46	1.19	223	5.77	205	2.31	136	3.52	51.3	33	155.45	2	0	1	92	1	0	3	1	2	2	2	1	30	3	1	1
28288	22	24	18	6.43	87	4.83	5.3	315.2	1	88.4	2	73	1	1	0.91	4289.96	59.49	83.3	144.3	40	107	5.9	78	2.02	212	5.48	129	1.456	108	2.793	3	44	6.82	1	0	1	72	1	1	3	0	1	2	3	1	21.5	3	1	1
20670	21	22	24	8.57	92	5.107	4.3	255.8	1.2	106.08	2	77	2	3	0.34	24655.5	46.62	57	148.2	25.95	95.3	5.4	45	1.16	207	5.35	140	1.58	134	3.47	9.7	33	29.39	1	1	1	89	0	0	2	1	1	2	3	1	27.5	3	1	0
46419	20	26	17	6.07	96	5.33	6.4	380.7	0.92	81.33	2	72	1	2	0.59	10626.1	66.16	69.4	151.8	30.12	98.7	8.2	37	0.96	209	5.4	178	2.01	136	3.517	22	42	52.38	1	0	1	55	1	1	3	1	2	2	2	1	30	3	1	0
52168	20	24	19	6.78	119	6.61	4.6	273.6	0.98	86.63	1	73	3	2	2.75	33722.5	81.42	81.1	185.7	23.52	94.2	5.9	58	1.5	167	4.32	76	0.858	94	2.431	12.1	115	10.52	2	0	1	73	1	0	1	0	1	1	2	0	30	3	0	1
16808	18	21	12	4.28	89	4.94	7.9	469.9	0.9	79.56	1	63	3	3	2.7	32749.2	95.97	71.7	168.7	25.19	96.3	5.3	44	1.14	214	5.53	175	1.98	135	3.49	415	148	280.41	1	0	1	95	0	0	2	1	2	2	1	0	30	3	0	1
58453	17	17	14	5	100	5.55	6.9	410.4	0.86	76.02	1	67	1	1	1.2	5449.73	94.9	65.8	155.6	27.18	100.3	5.4	37	0.96	350	9.05	875	9.879	115	2.97	2.3	47	4.89	2	0	1	73	1	0	2	1	1	1	1	0	30	3	0	0
59332	17	28	15	5.36	85	4.72	7.3	434.2	1.11	98.12	2	80	2	1	0.82	12981.6	50.25	62.3	149.2	27.99	93	5.6	61	1.58	149	3.85	122	1.377	64	1.655	70	50	140	1	1	1	67	0	0	2	0	2	3	3	1	21.5	3	1	1
19838	16	23	23	8.21	85	4.718	7.7	458	1.2	106.08	1	82	3	5	5	10142.4	60.38	90.3	168.7	31.73	109.7	5.2	62	1.6	194	5.02	144	1.63	103	2.66	2.4	62	3.87	2	1	1	77	0	0	3	1	1	1	2	1	30	3	1	1
11979	30	25	15	5.36	90	4.996	4.1	243.9	1	88.4	2	63	3	4	4.74	23136.4	63.3	74	174.2	24.39	84.7	5.3	84	2.17	253	6.54	172	1.94	135	3.49	6.1	150	4.07	2	1	1	83	0	0	1	1	1	1	2	0	21.5	3	0	1
9244	30	32	10	3.6	77	4.274	5	297.4	0.7	61.9	2	75	1	1	1.34	1222.49	90.13	55.6	147.1	25.7	85	5.3	54	1.39	206	5.33	139	1.57	115	2.97	5.5	61	9.02	2	0	1	74	0	0	2	1	1	1	1	0	21.5	3	0	1
21768	26	23	23	8.21	80	4.44	4.2	249.8	1	88.4	2	85	2	1	1.24	15834.9	55.21	64.8	150.5	28.61	100	5.6	55	1.42	261	6.75	167	1.885	173	4.474	20.2	120	16.83	1	0	1	60	0	0	2	1	1	2	3	1	24.8	3	1	1
44971	26	26	16	5.71	73	4.05	4.3	255.8	0.62	54.81	2	74	4	1	0.95	11681.9	93.39	69.6	155.8	28.67	99.9	5.8	70	1.81	222	5.74	63	0.711	139	3.595	48.3	74	65.27	1	0	1	76	1	0	2	0	2	2	1	0	21.5	3	1	1
5635	24	29	16	5.7	88	4.885	6.5	386.6	0.8	70.7	1	78	3	5	2.26	15773	90.59	84.4	174.7	27.65	100.3	5.3	42	1.09	253	6.54	181	2.04	175	4.53	1.4	52	2.69	2	0	1	72	0	0	2	1	1	1	1	0	30	3	0	1
25298	22	23	7	2.5	99	5.5	5.5	327.1	0.8	70.72	2	48	4	4	2.89	25663.5	90.83	135.8	165.2	49.76	127.8	5.8	51	1.32	223	5.77	101	1.14	152	3.931	28.2	174	16.21	2	0	1	91	1	0	3	0	1	1	1	0	15.9	2	1	1
25791	21	31	13	4.64	116	6.44	5.4	321.2	0.7	61.88	1	71	1	2	1.6	4044.34	98.51	59.5	149.4	26.66	93.6	6.9	58	1.5	164	4.24	140	1.581	78	2.017	6.1	42	14.52	1	0	1	59	1	1	2	1	1	1	1	0	30	3	0	1
36582	18	25	11	3.93	97	5.38	4.8	285.5	0.9	79.56	2	61	4	2	0.34	13659.3	72.73	51.3	162.7	19.38	84.2	5.3	69	1.78	359	9.28	223	2.518	245	6.336	110.8	236	46.95	1	1	1	96	0	0	1	1	2	2	2	1	30	3	0	1
40838	16	20	19	6.78	173	9.6	5.3	315.2	0.8	70.72	2	73	3	1	1.84	56799.7	77.75	60.9	156.9	24.74	86.2	7.8	72	1.86	235	6.08	96	1.084	144	3.724	3.2	39	8.21	1	0	1	59	0	1	1	0	1	1	2	0	30	3	0	1
358	14	15	14	5	90	4.996	6.6	392.6	0.8	70.7	2	48	4	4	1.21	16182.5	90.83	91.5	157.3	36.98	109.5	5.5	43	1.1	287	7.42	167	1.89	115	2.97	8.5	146	5.82	1	0	1	89	0	0	3	1	1	1	1	0	27.5	3	1	0
14074	12	19	21	7.5	92	5.107	5.2	309.3	1.1	97.24	2	83	3	4	2.76	9147.26	49.86	61.4	151.2	26.86	83	5.3	95	2.46	275	7.11	181	2.04	144	3.72	39.7	63	63.02	1	1	1	63	0	0	2	1	2	3	3	1	21.5	3	0	1
44141	12	24	11	3.93	108	6	5.4	321.2	0.82	72.49	2	77	1	1	1.33	6804.83	73.63	50.9	142.4	25.1	89.1	5.9	36	0.93	135	3.49	179	2.021	63	1.629	39.9	78	51.15	1	0	1	89	1	0	2	1	2	2	2	1	27.5	3	1	0
8734	11	16	16	5.7	82	4.552	4.4	261.7	0.6	53	2	77	1	2	1.89	1837.09	92.39	63.7	154.1	26.82	91.7	5.2	74	1.91	218	5.64	97	1.1	125	3.23	2.9	64	4.53	2	0	1	88	0	0	2	0	1	1	1	1	24.8	3	1	1
49404	120	64	11	3.93	95	5.27	8.5	505.6	0.72	63.65	2	44	3	4	0.58	27331.9	105.67	105.4	165.5	38.48	120.6	5.5	73	1.89	300	7.76	310	3.5	165	4.267	38.3	109	35.14	2	0	1	98	1	0	3	1	2	2	1	0	15.9	2	1	1
38651	35	45	14	5	106	5.88	4.6	273.6	0.9	79.56	1	75	1	1	1.54	4433.67	89.07	55.6	161.1	21.42	88.3	5.8	57	1.47	176	4.55	130	1.468	93	2.405	33.3	174	19.14	2	0	1	92	1	0	1	0	1	1	2	0	30	3	0	1
49366	35	43	17	6.07	95	5.27	4.4	261.7	0.72	63.65	2	74	2	1	1.66	7509.82	87.68	55.5	150	24.67	98.5	5.5	64	1.66	221	5.72	118	1.332	133	3.439	7.2	24	30	1	0	1	74	1	0	1	0	2	2	2	1	15.9	2	1	1
29412	34	48	15	5.36	130	7.22	5.2	309.3	0.9	79.56	1	71	4	5	5	11615.8	91.31	73.9	170.6	25.39	89.7	6.2	55	1.42	162	4.19	44	0.497	98	2.534	10.9	123	8.86	1	0	1	69	1	0	2	0	1	1	1	0	29.4	3	0	1
10007	33	36	10	3.57	209	11.602	4.2	249.8	0.7	61.88	2	63	1	3	0.87	2871.09	97.12	74.2	167.1	26.57	89.6	8.9	61	1.58	202	5.22	229	2.59	95	2.46	810	96	843.75	1	0	1	70	0	1	2	1	3	3	1	0	18.51	2	1	1
63377	33	29	61	21.78	284	15.76	7.1	422.3	3.46	305.86	2	39	4	4	5	28315.1	16.57	110.6	171.7	37.5	118	7.3	34	0.88	182	4.71	248	2.8	98	2.534	1410	63	2238.1	2	1	1	85	0	1	3	1	3	4	5	1	7.3	1	1	0
12807	32	25	15	5.36	115	6.384	6	356.9	1.1	97.24	1	78	4	1	0.79	5540.94	68.71	85.9	169.4	29.93	112	5.8	34	0.88	195	5.04	149	1.68	131	3.39	6	183	3.28	2	0	1	98	1	0	2	1	1	1	2	0	30	3	1	0
645	28	33	14	5	100	5.551	7.6	452	0.9	79.6	1	76	3	4	3.02	16848.8	88.51	68.3	170.2	23.58	93.9	5.1	25	0.65	125	3.23	146	1.65	71	1.84	1	17	5.88	1	0	1	76	1	0	1	1	1	1	2	0	30	3	0	0
56816	27	25	14	5	84	4.66	5.5	327.1	0.92	81.33	1	56	4	2	4.12	24008.3	97.63	87.2	177.2	27.77	99.9	5.7	43	1.11	149	3.85	38	0.429	98	2.534	9	210	4.29	2	0	1	90	1	0	2	0	1	1	1	0	25.3	3	0	1
3498	25	32	11	3.9	101	5.607	5.1	303.3	0.9	79.6	1	43	4	2	1.86	11356.2	108.68	82.2	165.2	30.12	95.2	5.4	60	1.56	178	4.6	76	0.86	103	2.66	4.9	141	3.48	2	0	1	100	1	0	3	0	1	1	1	0	6.7	1	0	1
129	24	23	10	3.6	100	5.551	5.2	309.3	0.3	26.5	2	63	3	4	5	21011.4	119.12	103.7	164.5	38.32	118.3	5.5	55	1.41	186	4.81	66	0.75	118	3.05	15.5	25	62	2	0	1	0	1	0	3	0	2	2	1	0	24.8	3	1	1
20422	21	20	10	3.57	93	5.162	4.3	255.8	0.8	70.72	2	64	4	4	2.84	6706.48	82.23	76.7	166.1	27.8	86.6	5.6	61	1.58	197	5.09	211	2.38	94	2.43	5.1	73	6.99	1	0	1	76	0	0	2	1	1	1	2	0	11.7	2	0	1
53811	21	22	9	3.21	107	5.94	7	416.4	1.18	104.31	1	26	4	3	1.65	33868.1	87.28	62.5	168.4	22.04	82	5.4	46	1.19	154	3.98	72	0.813	94	2.431	2.9	154	1.88	2	0	1	96	1	0	1	0	1	1	2	0	6.7	1	0	1
11614	20	24	15	5.36	80	4.441	4.1	243.9	0.7	61.88	2	67	3	4	2.15	23136.4	94.73	63.8	163.9	23.75	81.2	5	62	1.6	198	5.12	75	0.85	115	2.97	3.4	18	18.89	2	0	1	85	0	0	1	0	1	1	1	0	27.5	3	0	1
29924	19	21	11	3.93	97	5.38	5.9	350.9	1.1	97.24	1	75	3	1	0.96	14225.8	70.01	97.7	173.6	32.42	114	5.7	42	1.09	330	8.53	181	2.043	252	6.517	17.2	44	39.09	1	1	1	94	1	0	3	1	2	2	2	1	30	3	1	1
52597	19	20	12	4.28	149	8.27	3.9	232	0.5	44.2	2	69	1	1	1.23	4577.18	101.46	91	154.3	38.22	118.1	6.7	39	1.01	221	5.72	404	4.561	115	2.97	13.3	42	31.67	1	0	1	63	0	1	3	1	2	2	1	0	27.5	3	1	0
7073	17	22	15	5.4	156	8.66	4.4	261.7	0.7	61.9	1	81	1	1	0.87	1346.77	92.57	67.8	163	25.52	95.7	6.8	27	0.7	174	4.5	394	4.45	68	1.76	23.7	179	13.24	2	0	1	77	0	1	2	1	1	1	1	0	30	3	0	0
44229	16	21	12	4.28	117	6.49	5.6	333.1	0.62	54.81	2	72	3	3	2.41	31860.2	94.56	68.1	164.9	25.04	104.8	6.3	71	1.84	187	4.84	84	0.948	99	2.56	18.8	96	19.58	2	0	1	73	1	1	2	0	1	1	1	0	13.7	2	1	1
11789	15	48	9	3.21	105	5.829	5.8	345	0.8	70.72	2	79	3	2	0.7	25851.5	74.9	65.9	167.8	23.4	99.1	5.2	90	2.33	216	5.59	86	0.97	109	2.82	17.6	23	76.52	2	0	1	71	1	0	1	0	2	2	2	1	24.8	3	1	1
35688	15	24	14	5	112	6.22	6.3	374.7	1.4	123.76	1	85	3	3	1.98	22077.2	49.25	86.8	176	28.02	110	5.1	33	0.85	166	4.29	177	1.998	98	2.534	586	84	697.62	1	0	1	78	1	0	2	1	3	4	3	1	30	3	1	0
61053	15	23	27	9.64	130	7.22	8.4	499.6	1.57	138.79	1	78	4	1	0.75	10680.5	44.84	93.3	176.5	29.95	105.1	7.7	67	1.73	155	4.01	118	1.332	64	1.655	43.4	124	35	2	0	1	93	0	1	2	0	2	4	4	1	30	3	1	1
25679	14	21	21	7.5	102	5.66	6.2	368.8	1.1	97.24	2	78	4	4	3.63	18499.9	51.43	52.8	158.7	20.96	78.5	6.2	70	1.81	138	3.57	64	0.723	55	1.422	20.1	122	16.48	1	0	1	67	1	1	1	0	1	2	3	1	18.51	2	0	1
10102	13	16	12	4.28	203	11.269	5.1	303.3	0.9	79.56	1	63	4	1	1.04	5948.3	95.97	87.8	172.9	29.37	102.7	8.2	50	1.29	137	3.54	54	0.61	115	2.97	190	132	143.94	1	0	1	75	0	1	2	0	2	2	1	0	30	3	1	1
33691	13	14	22	7.85	103	5.72	5.9	350.9	1.1	97.24	2	58	4	3	1.55	31715.1	58.24	78.8	152.7	33.79	95.3	8.5	90	2.33	299	7.73	89	1.005	191	4.939	3.3	93	3.55	1	0	1	0	1	1	3	0	1	2	3	1	18.51	2	1	1
9477	13	20	14	5	99	5.495	5.1	303.3	0.7	61.9	2	66	3	4	2.71	21484.1	95.32	93.8	168	33.23	102.2	5.6	67	1.74	209	5.4	85	0.96	125	3.23	7	54	12.96	2	0	1	68	1	0	3	0	1	1	1	0	18.51	2	1	1
8285	12	22	13	4.6	88	4.885	5.5	327.1	0.8	70.7	2	61	4	1	0.61	8556.14	83.78	80.3	163.4	30.08	96.7	5.4	82	2.11	258	6.67	131	1.48	150	3.88	30.8	123	25.04	1	1	1	65	0	0	3	0	1	1	2	0	18.51	2	1	1
11525	29	28	19	6.78	103	5.718	8.8	523.4	1.3	114.92	1	74	3	2	4.19	13098.5	57.65	87.3	178.6	27.37	104.2	5.8	34	0.88	185	4.78	206	2.33	110	2.84	11.1	141	7.87	2	0	1	81	1	0	2	1	1	2	3	1	30	3	1	0
3075	24	29	14	5	95	5.273	3.6	214.1	0.5	44.2	2	85	3	1	0.9	11863.8	91.85	69.2	151.1	30.31	106.8	5.4	72	1.85	258	6.67	142	1.6	158	4.09	13.4	35	38.29	1	0	1	92	0	0	3	1	2	2	1	0	27.5	3	1	1
47136	20	27	14	5	87	4.83	4.5	267.7	0.56	49.5	2	62	2	1	0.86	4625.71	103.12	52.5	150.8	23.09	83	5.5	75	1.94	262	6.78	142	1.603	159	4.112	8.1	20	40.5	2	0	1	87	0	0	1	1	2	2	1	0	13.7	2	0	1
26385	19	18	11	3.93	192	10.66	4.2	249.8	1	88.4	1	52	4	4	2.87	24958.5	90.56	99.7	173.7	33.04	112.9	7.9	49	1.27	170	4.4	122	1.377	97	2.508	15.6	81	19.26	2	0	1	97	0	1	3	0	1	1	1	0	30	3	1	1
13471	17	19	16	5.71	191	10.602	6.2	368.8	1.1	97.24	2	76	3	4	1.81	25851.5	52.08	72.6	158.4	28.94	107.5	7.8	58	1.5	222	5.74	256	2.89	113	2.92	20.4	49	41.63	1	0	1	71	0	1	2	1	2	3	3	1	27.5	3	1	1
43474	17	21	10	3.57	91	5.05	4	237.9	0.68	60.11	2	69	3	4	1.25	24057.1	94.22	72.7	152.8	31.14	99.6	5.5	72	1.86	182	4.71	63	0.711	97	2.508	60.5	175	34.57	2	0	1	67	0	0	3	0	2	2	1	0	15.9	2	1	1
14835	16	19	11	3.93	92	5.107	5.6	333.1	0.7	61.88	2	58	3	4	5	41287.7	100.19	67	169.8	23.24	81	5	65	1.68	221	5.72	155	1.75	125	3.23	7	125	5.6	2	0	1	97	0	0	1	1	1	1	1	0	15.9	2	0	1
48633	14	19	23	8.21	171	9.49	3.5	208.2	1.02	90.17	2	79	1	1	0.75	10626.1	55.96	69.6	160.1	27.15	102	8.4	60	1.55	164	4.24	134	1.513	77	1.991	11.6	57	20.35	2	1	1	71	0	1	2	0	1	2	3	1	30	3	1	1
16899	13	22	17	6.07	99	5.495	7.8	463.9	1	88.4	2	78	4	1	1.11	6699.93	57.66	72.3	163.1	27.18	103.4	5.9	49	1.27	183	4.73	105	1.19	115	2.97	162.2	125	129.76	1	1	1	89	1	1	2	0	2	3	3	1	30	3	1	0
29252	13	26	9	3.21	101	5.61	6.7	398.5	1.1	97.24	1	77	4	2	2.69	10753	69.14	70.4	168.7	24.74	94.7	5.4	67	1.73	235	6.08	123	1.389	143	3.698	15.3	164	9.33	2	0	1	83	0	0	1	0	1	1	2	0	30	3	0	1
58221	13	22	14	5	97	5.38	6.3	374.7	1.32	116.69	1	68	4	3	2.4	12001.4	58.75	63.5	175.2	20.69	84.3	5.3	83	2.15	215	5.56	69	0.779	118	3.051	3.9	173	2.25	2	0	1	39	1	0	1	0	1	2	3	1	29.4	3	0	1
42154	71	64	15	5.36	220	12.21	5.3	315.2	0.99	87.52	1	75	3	1	1.87	32312.2	79.44	78.5	176.1	25.31	97.9	6.4	32	0.83	101	2.61	177	1.998	34	0.879	20.6	100	20.6	1	0	1	75	1	1	2	1	1	1	2	0	30	3	0	0
42103	46	58	14	5	125	6.94	5.2	309.3	0.82	72.49	2	67	4	3	3.07	10371.5	78.35	80.1	165.7	29.17	102.8	5.5	85	2.2	165	4.27	82	0.926	64	1.655	15.4	237	6.5	1	0	1	85	0	1	2	0	1	1	2	0	24.8	3	1	1
48086	42	44	21	7.5	104	5.77	6.4	380.7	1.02	90.17	1	75	3	4	2.19	26604	76.64	76	169.8	26.36	93.5	5.9	52	1.34	186	4.81	114	1.287	111	2.87	15.8	106	14.91	1	1	1	71	1	0	2	0	1	1	2	0	30	3	0	1
17181	41	47	12	4.28	103	5.718	6.8	404.5	1	88.4	1	51	1	4	5	5549.87	91.12	88.1	166.2	31.89	106.7	5.2	49	1.27	183	4.73	220	2.48	90	2.33	21.2	213	9.95	2	0	1	80	1	0	3	1	1	1	1	0	25.3	3	1	1
30405	41	27	11	3.93	122	6.77	6.1	362.8	0.8	70.72	1	45	4	3	2.8	24885.2	111.22	142.6	180.2	43.91	144	6.1	36	0.93	251	6.49	108	1.219	193	4.991	50.1	92	54.46	2	0	1	113	1	0	3	0	2	2	1	0	18.4	2	1	0
54631	36	33	11	3.93	191	10.6	5.5	327.1	0.81	71.6	1	64	1	4	3	7272.07	98.46	74.5	166.9	26.75	95.5	8	42	1.09	206	5.33	137	1.547	137	3.543	2.6	49	5.31	1	0	1	79	0	1	2	1	1	1	1	0	30	3	0	1
11702	34	27	17	6.07	106	5.884	4.4	261.7	0.9	79.56	2	63	3	4	5	18257.9	71.83	99.4	165.2	36.42	113	6.2	36	0.93	189	4.89	322	3.64	89	2.3	2.9	29	10	2	0	1	88	1	0	3	1	1	1	2	0	21.5	3	1	0
42435	30	25	8	2.86	90	5	6.9	410.4	0.72	63.65	1	34	1	2	1.18	36551.6	122.95	68.6	179.9	21.2	83.7	4.9	60	1.55	190	4.91	95	1.073	111	2.87	6	94	6.38	2	0	1	91	0	0	1	0	1	1	1	0	5.6	1	0	1
65401	28	38	11	3.93	83	4.61	5.7	339	0.9	79.56	1	55	3	4	1.4	31291.4	100.86	73.2	173.1	24.4	103.8	4.7	108	2.79	271	7.01	77	0.869	148	3.827	4.7	90	5.22	2	0	1	108	0	0	1	0	1	1	1	0	30	3	1	1
1598	26	32	22	7.9	96	5.329	4	237.9	0.8	70.7	2	85	3	3	0.06	9397.11	72.16	54.5	160.8	21.08	73	5.7	80	2.06	233	6.03	97	1.1	134	3.47	19.4	115	16.87	2	0	1	38	1	0	1	0	1	1	2	0	27.5	3	0	1
13770	24	42	9	3.21	96	5.329	9.4	559.1	0.8	70.72	1	61	4	3	0.74	4785.22	100.69	91	179.5	28.24	114.1	5.7	33	0.85	222	5.74	75	0.85	174	4.5	17.8	263	6.77	2	1	1	91	1	1	2	0	1	1	1	1	30	3	1	0
28181	21	31	15	5.36	99	5.5	4.3	255.8	0.9	79.56	1	81	3	3	2.31	16427.6	85.8	88.3	164.3	32.71	111.5	5.7	75	1.94	214	5.53	62	0.7	127	3.284	4.5	66	6.82	2	0	1	87	1	0	3	0	1	1	2	0	30	3	1	1
42165	21	24	9	3.21	111	6.16	7.8	463.9	1	88.4	1	67	4	1	0.71	7750.96	82.49	100.6	166.8	36.16	119.5	6.7	40	1.03	158	4.09	81	0.914	102	2.638	194.8	160	121.75	1	0	1	92	1	1	3	0	2	2	2	1	30	3	1	1
22369	20	25	8	2.86	93	5.16	6.6	392.6	1	88.4	2	56	4	4	2.48	28232.1	66.12	92.6	172	31.3	109	5.5	55	1.42	250	6.47	186	2.1	158	4.086	64	143	44.76	1	0	1	97	0	0	3	1	2	2	2	1	21.5	3	1	1
6499	20	23	14	5	88	4.885	4.7	279.6	0.9	79.6	2	74	3	4	5	20547.9	67.08	58.1	162.2	22.08	81.1	5.2	95	2.45	214	5.53	83	0.94	103	2.66	18.5	141	13.12	2	0	1	67	0	0	1	0	1	1	2	0	21.5	3	0	1
3293	19	18	8	2.9	175	9.714	5	297.4	0.6	53	2	60	4	2	1.32	5844.41	102.69	93.1	163.1	35	115.8	8	47	1.22	193	4.99	103	1.16	125	3.23	87.8	153	57.39	2	1	1	89	0	1	3	0	2	2	1	0	13.7	2	1	0
46158	18	18	9	3.21	114	6.33	5.1	303.3	1.09	96.36	1	70	3	3	1.29	34961.9	73.01	79.7	174.3	26.23	102	5.6	49	1.27	160	4.14	80	0.903	95	2.457	9.1	43	21.16	2	1	1	77	0	1	2	0	1	1	2	0	30	3	1	1
293	17	29	16	5.7	97	5.384	6.1	362.8	0.7	61.9	2	85	3	1	1.43	9397.11	84.7	54.7	151.6	23.8	87.6	5.7	74	1.92	321	8.3	90	1.02	229	5.92	12	136	8.82	1	1	1	59	1	0	1	0	1	1	2	0	30	3	0	1
49608	16	22	10	3.57	113	6.27	6.4	380.7	0.73	64.53	2	80	3	3	5	28958.6	83.08	68.7	156.3	28.12	94.2	5.7	57	1.47	216	5.59	245	2.766	110	2.845	37.9	51	74.31	1	0	1	41	1	0	2	1	2	2	2	1	27.5	3	1	1
7312	14	23	9	3.2	83	4.607	5	297.4	0.7	61.9	2	62	3	5	2.99	29901.4	97.73	70.6	165.3	25.84	100.2	5.3	61	1.58	233	6.03	149	1.68	142	3.67	13	59	22.03	2	0	1	93	0	0	2	1	1	1	1	0	21.5	3	1	1
16131	40	35	13	4.64	252	13.989	4.2	249.8	0.9	79.56	1	67	1	1	1.21	1758.01	93.61	79.2	170.6	27.21	104.8	11.1	39	1.01	270	6.98	531	5.99	115	2.97	517.5	207	250	2	0	1	77	0	1	2	1	2	2	1	0	30	3	1	0
22325	35	29	12	4.28	108	6	3.5	208.2	0.7	61.88	2	72	1	3	1.82	4289.96	91.83	76.6	157.8	30.76	100.5	5.5	65	1.68	175	4.53	103	1.163	89	2.302	12	43	27.91	2	0	1	82	1	0	3	0	1	1	1	0	18.51	2	1	1
61326	29	26	11	3.93	210	11.66	3	178.4	0.6	53.04	2	57	3	4	2.39	25317.8	104.63	81.4	169.3	28.4	100.6	8.7	37	0.96	180	4.65	209	2.36	101	2.612	24.3	146	16.64	2	0	1	80	0	1	2	1	1	1	1	0	21.5	3	1	0
51348	25	29	20	7.14	96	5.33	7.7	458	1.42	125.53	1	80	3	5	2.05	30714.4	49.95	80.5	169.1	28.15	104.3	5.5	84	2.17	228	5.9	87	0.982	127	3.284	1.5	18	8.33	2	1	1	52	1	0	2	0	1	2	3	1	30	3	1	1
48623	22	21	20	7.14	112	6.22	7	416.4	1.12	99.01	1	62	3	5	5	52939.8	74.28	93.1	187.9	26.37	102	5.5	54	1.4	142	3.67	108	1.219	66	1.707	6.6	111	5.95	2	0	1	90	0	1	2	0	1	1	2	0	21.6	3	1	1
24717	19	18	11	3.93	90	5	3.9	232	0.7	61.88	2	66	4	3	2.27	14117.8	95.32	63.4	154.8	26.46	90	5.4	63	1.63	217	5.61	84	0.948	137	3.543	5.6	121	4.63	2	0	1	75	0	0	2	0	1	1	1	0	13.7	2	1	1
57762	19	21	9	3.21	81	4.5	3.5	208.2	0.76	67.18	2	67	4	3	1	20090.3	85.83	80.5	160.8	31.13	98.8	5.9	63	1.63	220	5.69	114	1.287	134	3.465	0.3	10	3	1	0	1	69	1	0	3	0	1	1	2	0	13.7	2	1	1
51616	18	24	19	6.78	69	3.83	7.8	463.9	1.29	114.04	1	60	3	3	3.93	61802	63.48	142.6	183.4	42.4	140.5	7.3	72	1.86	173	4.47	127	1.434	76	1.965	1534	22	6972.73	2	0	1	53	0	1	3	0	3	3	2	1	30	3	1	1
47825	17	21	22	7.85	83	4.61	5.1	303.3	0.72	63.65	2	69	2	3	2.05	10138.9	90.45	49.9	150.7	21.97	80	6.5	54	1.4	206	5.33	147	1.66	123	3.181	3.8	38	10	2	0	1	71	0	1	1	1	1	1	1	0	21.5	3	0	1
15313	14	22	53	18.92	93	5.162	13.9	826.8	3.1	274.04	2	85	3	3	2.21	7753.28	14.2	64.2	154.5	26.9	92.1	5.2	38	0.98	209	5.4	127	1.43	146	3.78	27.9	49	56.94	1	1	1	59	0	0	2	0	2	4	6	1	30	3	1	0
33642	14	29	10	3.57	81	4.5	6.3	374.7	0.7	61.88	2	77	3	4	3.56	56799.7	89.02	46.3	157.4	18.69	80.2	5.2	87	2.25	216	5.59	287	3.24	72	1.862	19.6	89	22.02	2	0	1	85	0	0	1	1	1	1	2	0	27.5	3	0	1
42342	13	23	15	5.36	104	5.77	6.6	392.6	0.82	72.49	1	80	3	4	2.23	26630	88.8	87.3	172.7	29.27	110	5.4	41	1.06	218	5.64	167	1.885	144	3.724	26.2	70	37.43	1	0	1	58	1	0	2	1	2	2	2	1	30	3	1	1
5323	13	16	34	12.1	85	4.718	7.6	452	0.8	70.7	2	74	3	2	2.09	22866.1	77.27	52.6	154.5	22.04	80.5	5.5	67	1.74	223	5.77	163	1.84	123	3.18	7.2	107	6.73	2	0	1	62	0	0	1	1	1	1	2	0	21.5	3	0	1
11293	9	14	45	16.07	98	5.44	6.7	398.5	2.1	185.64	1	85	3	1	0.25	4539.25	30.28	84.3	177.9	26.64	114.7	5.9	41	1.06	213	5.51	144	1.63	143	3.7	269.5	74	364.19	1	0	1	0	1	0	2	1	3	4	4	1	30	3	1	1
56766	39	35	17	6.07	160	8.88	4.4	261.7	0.84	74.26	2	75	3	3	2.61	20018.2	72.42	91.2	156	37.48	117.5	7.6	66	1.71	212	5.48	140	1.581	118	3.051	291	142	204.93	1	1	1	60	0	1	3	1	2	2	2	1	27.5	3	1	1
51116	32	27	63	22.49	87	4.83	8.6	511.5	2.72	240.45	2	44	2	1	1.05	17358.1	21.44	55.7	148.4	25.29	86	4.6	87	2.25	214	5.53	147	1.66	98	2.534	205	66	310.61	2	0	1	53	0	0	2	1	3	4	5	1	11.7	2	0	1
19788	30	19	17	6.07	109	6.051	8.7	517.5	1.4	123.76	1	53	4	2	2.85	11710.9	60.1	87.9	182.4	26.42	100.9	5.8	37	0.96	171	4.42	70	0.79	120	3.1	16.1	129	12.48	2	0	1	108	1	0	2	0	1	1	2	0	30	3	0	0
48579	30	24	16	5.71	86	4.77	4.4	261.7	0.62	54.81	2	38	4	2	3.62	23203	116.82	84.9	155.1	35.29	93.7	5.2	47	1.22	154	3.98	36	0.406	100	2.586	17	126	13.49	2	0	1	113	0	0	3	0	1	1	1	0	5.3	1	1	0
39831	28	31	12	4.28	100	5.55	6.9	410.4	1.1	97.24	1	66	3	5	5	63593.8	74.04	99.4	184.8	29.11	111.2	5.3	47	1.22	167	4.32	187	2.111	83	2.146	4.2	96	4.38	2	1	1	54	1	0	2	1	1	1	2	0	30	3	1	1
4838	28	32	21	7.5	95	5.273	7.8	463.9	0.8	70.7	2	85	3	4	2.67	9397.11	72.16	71	160	27.73	100	5.8	39	1	212	5.48	196	2.21	134	3.47	28.1	165	17.03	2	0	1	79	1	0	2	1	1	1	2	0	27.5	3	1	0
5759	28	19	15	5.4	81	4.496	4.5	267.7	0.4	35.4	2	52	1	1	3.08	5965.34	119.01	69.9	161	26.97	90.5	4.9	51	1.31	170	4.4	155	1.75	88	2.28	18.5	206	8.98	2	0	1	87	0	0	2	1	1	1	1	0	18.51	2	1	1
44569	26	24	22	7.85	87	4.83	6.7	398.5	1.12	99.01	1	66	3	3	1.49	17290.3	72.45	77.1	170.6	26.49	102.1	4.9	41	1.06	167	4.32	240	2.71	78	2.017	18	210	8.57	2	0	1	77	0	0	2	1	1	1	2	0	30	3	1	1
15949	21	25	20	7.14	111	6.162	7.6	452	1.1	97.24	2	66	5	1	0.68	24820.7	55.42	61.1	155.8	25.17	93.2	6.7	61	1.58	260	6.72	189	2.13	161	4.16	114	129	88.37	1	0	1	107	1	1	2	1	2	3	3	1	24.8	3	1	1
20698	21	30	16	5.71	94	5.218	5.6	333.1	0.9	79.56	1	76	3	5	5	14330.4	88.51	72.5	168	25.69	96.6	5.2	53	1.37	218	5.64	157	1.77	134	3.47	12.9	152	8.49	2	0	1	99	0	0	2	1	1	1	2	0	30	3	0	1
21874	21	24	23	8.21	199	11.05	9.1	541.3	2	176.8	1	66	4	1	0.96	11962.4	36.13	113	173.7	37.45	120	7.1	52	1.34	272	7.03	226	2.552	175	4.526	31.7	95	33.37	1	1	1	99	0	1	3	1	2	4	4	1	30	3	1	1
29578	19	21	26	9.28	84	4.66	6.7	398.5	1.4	123.76	1	85	3	3	2.23	16671.1	49.25	52.7	163.2	19.79	81	5	69	1.78	206	5.33	52	0.587	127	3.284	37.6	83	45.3	2	1	1	82	0	0	1	0	2	3	3	1	30	3	0	1
17158	18	18	7	2.5	92	5.107	4.1	243.9	0.7	61.88	2	62	3	4	2.24	26236.2	97.73	59	148.1	26.9	86.7	5.2	42	1.09	296	7.65	194	2.19	215	5.56	4.3	47	9.15	2	0	1	85	0	0	2	1	1	1	1	0	30	3	0	0
44010	18	20	32	11.42	127	7.05	5.2	309.3	0.9	79.56	2	72	1	1	1.42	8773.91	67.92	84.8	158.1	33.93	112	7.7	56	1.45	165	4.27	104	1.174	88	2.276	79	63	125.4	1	0	1	59	0	1	3	0	2	2	2	1	21.5	3	1	1
58205	17	25	11	3.93	91	5.05	6.3	374.7	1.17	103.43	1	62	4	5	0.69	9326.2	70.48	76.9	169.6	26.73	93.4	5.8	32	0.83	240	6.21	133	1.502	181	4.681	35.8	195	18.36	1	1	1	94	1	0	2	0	1	1	2	0	30	3	0	0
10518	16	22	19	6.78	94	5.218	5.4	321.2	0.9	79.56	2	63	2	1	1.42	15511.1	71.83	56.9	150	25.29	96.2	5.7	37	0.96	181	4.68	233	2.63	97	2.51	37.4	113	33.1	1	0	1	67	1	0	2	1	2	2	2	1	30	3	1	0
1464	16	23	8	2.9	96	5.329	4.4	261.7	0.5	44.2	1	61	1	1	1.33	1728.78	116.04	58.2	159.1	22.99	91.5	5.5	65	1.68	242	6.26	108	1.22	156	4.03	93.8	67	140	2	0	1	103	0	0	1	0	2	2	1	0	30	3	0	1
56163	16	16	19	6.78	297	16.49	5.9	350.9	1.04	91.94	1	61	1	1	0.45	5848.9	81.69	74.2	163.7	27.69	101	10.1	43	1.11	191	4.94	160	1.806	116	3	803	100	803	2	0	1	61	0	1	2	1	3	3	2	1	25.3	3	0	1
21192	15	24	14	5	98	5.44	5.3	315.2	0.9	79.56	2	80	3	1	1.4	20755	64.63	70.3	155.2	29.19	96.6	5.6	45	1.16	273	7.06	204	2.303	187	4.836	44.7	141	31.7	1	0	1	74	1	0	2	1	2	2	2	1	30	3	1	0
65334	15	19	14	5	105	5.83	4.6	273.6	0.78	68.95	2	60	2	2	0.75	13677	86.9	86.2	158.2	34.4	106.2	7.8	46	1.19	169	4.37	205	2.314	82	2.121	1150	148	777.03	2	1	1	69	1	1	3	1	3	3	2	1	21.5	3	1	0
55392	14	21	12	4.28	94	5.22	6	356.9	0.73	64.53	2	75	3	3	1.07	24608.4	85.71	80.7	151.5	35.16	110.5	5.4	47	1.22	242	6.26	214	2.416	152	3.931	6.9	46	15	1	1	1	76	0	0	3	1	1	1	2	0	30	3	1	0
24900	12	17	12	4.28	88	4.88	4.7	279.6	0.6	53.04	2	58	1	1	4.95	20807	103.98	69.7	159.4	27.43	104.5	5	70	1.81	174	4.5	177	1.998	69	1.784	71	158	44.94	2	0	1	90	0	0	2	1	2	2	1	0	18.51	2	1	1
21063	70	61	6	2.14	112	6.22	4.4	261.7	0.8	70.72	1	69	1	1	1.17	2251.57	95.8	87.5	166.8	31.45	107.8	6.5	28	0.72	201	5.2	241	2.721	125	3.233	15.5	27	57.41	2	0	1	93	1	1	3	1	2	2	1	0	30	3	1	0
32014	46	42	7	2.5	78	4.33	5.3	315.2	1	88.4	2	59	3	4	5	95070.2	64.9	77.5	168.1	27.43	92.8	5.2	52	1.34	164	4.24	71	0.802	98	2.534	8.7	36	24.17	2	0	1	88	0	0	2	0	1	1	2	0	13.7	2	1	1
20196	30	28	9	3.21	106	5.884	6.2	368.8	0.8	70.72	2	61	3	2	2.01	21453.5	83.78	77.6	157.8	31.16	108.1	5.1	52	1.34	192	4.97	300	3.39	80	2.07	4	50	8	2	0	1	79	1	0	3	1	1	1	2	0	24.8	3	1	1
19670	22	23	14	5	137	7.605	6.3	374.7	0.9	79.56	2	75	4	4	2.48	6699.93	66.67	127.4	158.3	50.84	128.8	6.7	43	1.11	323	8.35	122	1.38	256	6.62	509.5	171	297.95	1	0	1	89	0	1	3	0	2	2	2	1	30	3	1	0
10844	21	15	9	3.21	251	13.933	3.6	214.1	0.7	61.88	2	53	4	2	1.88	17865.7	103.35	87.7	160.3	34.13	109.1	10.4	47	1.22	189	4.89	126	1.42	117	3.03	251.5	228	110.31	2	1	1	102	0	1	3	0	2	2	1	0	21.5	3	1	0
27643	20	19	45	16.07	97	5.38	8.4	499.6	2.9	256.36	1	70	3	1	0.96	14225.8	22.56	71.7	172.4	24.12	98.5	5.7	45	1.16	110	2.84	70	0.79	51	1.319	4430	52	8519.23	1	1	1	59	1	1	1	0	3	4	5	1	30	3	0	1
11982	19	22	16	5.71	95	5.273	4.3	255.8	0.8	70.72	1	68	1	1	1.63	1174.92	96.4	76.5	160.1	29.85	99.9	8.4	35	0.91	163	4.22	101	1.14	108	2.79	8	40	20	2	0	1	77	0	1	2	0	1	1	1	0	29.4	3	0	0
54993	19	17	31	11.07	148	8.22	8.7	517.5	1.44	127.3	2	70	1	1	0.84	13788.7	39.13	66	156.6	26.91	94	8.1	54	1.4	273	7.06	289	3.263	161	4.163	128.5	57	225.44	1	1	1	57	0	1	2	1	2	4	4	1	27.5	3	1	1
41138	18	21	13	4.64	132	7.33	6.8	404.5	1.1	97.24	1	62	4	2	2.13	7289.41	75.9	109.1	175.1	35.58	118.6	6.5	51	1.32	159	4.11	89	1.005	90	2.327	8.6	83	10.36	1	1	1	81	0	1	3	0	1	1	2	0	30	3	1	1
9892	15	19	15	5.4	222	12.323	5.1	303.3	0.6	53	2	81	1	1	1.8	1131.93	90.12	61.8	152.4	26.61	110.1	5.8	64	1.65	239	6.18	218	2.46	115	2.97	172.5	110	156.82	1	1	1	93	1	1	2	1	2	2	1	0	24.8	3	1	1
1384	13	15	9	3.2	97	5.384	3.2	190.3	0.6	53	1	71	1	1	1.37	1383.02	103.2	51.6	161.3	19.83	79.6	5.7	54	1.39	163	4.22	97	1.1	90	2.33	2.7	52	5.19	1	0	1	77	1	0	1	0	1	1	1	0	30	3	0	1
61362	37	37	10	3.57	102	5.66	4.6	273.6	0.57	50.39	2	60	4	3	1.84	18879.5	103.97	77.2	163.9	28.74	98.1	5.2	87	2.25	208	5.38	41	0.463	113	2.922	5.6	150	3.73	1	0	1	88	1	0	2	0	1	1	1	0	24.8	3	1	1
46692	35	40	13	4.64	95	5.27	4.9	291.5	0.99	87.52	1	78	3	3	2.86	30137	77.97	86.4	181.8	26.14	105.9	5.7	51	1.32	229	5.92	206	2.326	137	3.543	4.8	70	6.86	1	0	1	75	1	0	2	1	1	1	2	0	30	3	1	1
58265	32	33	13	4.64	109	6.05	5.6	333.1	0.69	61	2	68	3	3	1.29	25489.9	94.47	79.3	155.3	32.88	106.9	5.6	43	1.11	312	8.07	261	2.947	217	5.612	5.3	71	7.46	1	1	1	89	1	1	3	1	1	1	1	0	30	3	1	0
63633	31	25	18	6.43	318	17.65	4.8	285.5	1.22	107.85	1	48	4	5	4.9	13232.1	73.13	104.6	184.8	30.6	110.2	10.2	37	0.96	110	2.84	70	0.79	59	1.526	322.5	129	250	2	0	1	92	0	1	3	0	2	2	2	1	11.2	2	1	0
14379	29	35	26	9.28	89	4.94	6.8	404.5	1.2	106.08	1	85	3	4	5	7027.45	59.26	80.2	172.8	26.86	101.6	5.2	90	2.33	235	6.08	77	0.87	130	3.36	55.5	161	34.47	2	0	1	68	0	0	2	0	2	3	3	1	30	3	0	1
1571	27	27	28	10	90	4.996	8.2	487.7	1.3	114.9	1	65	3	4	5	23687.1	60.97	89	180.2	27.41	98	5.2	46	1.18	172	4.45	119	1.34	102	2.64	26.1	57	45.79	1	1	1	83	0	0	2	0	2	2	2	1	30	3	0	1
40088	26	19	11	3.93	140	7.77	5.4	321.2	0.7	61.88	2	69	1	1	0.7	10668.7	93.56	78.6	147.7	36.03	113.5	6.9	42	1.09	226	5.84	226	2.552	139	3.595	31.2	81	38.52	1	0	1	81	0	1	3	1	2	2	1	0	21.5	3	1	0
9207	26	21	17	6.1	104	5.773	7	416.4	0.7	61.9	1	66	1	1	1.5	1202.61	101.62	93.2	167.3	33.3	118.2	5.5	34	0.87	209	5.4	230	2.6	129	3.34	7.4	105	7.05	1	0	1	81	1	0	3	1	1	1	1	0	30	3	1	0
26412	25	32	10	3.57	83	4.61	6.6	392.6	0.6	53.04	2	48	5	4	1.24	53430.5	110.65	65	169.2	22.7	90.3	5	90	2.33	187	4.84	198	2.235	57	1.474	1.3	24	5.42	2	0	1	75	0	0	1	1	1	1	1	0	7.3	1	1	1
51258	22	23	11	3.93	81	4.5	5.8	345	0.72	63.65	2	56	4	5	1.55	23852.2	98.07	82.5	170.8	28.28	103.5	5.7	84	2.17	276	7.14	134	1.513	165	4.267	240.5	237	101.48	2	1	1	103	1	0	2	0	2	2	1	1	15.9	2	1	1
25727	20	24	15	5.36	123	6.83	6.3	374.7	1.4	123.76	1	66	3	5	4.13	47864.6	55.43	75.3	159.4	29.64	106.7	6.5	45	1.16	188	4.86	259	2.924	91	2.353	126.5	272	46.51	1	0	1	96	0	1	2	1	2	3	3	1	30	3	1	1
63260	20	21	6	2.14	77	4.27	3.6	214.1	0.62	54.81	2	42	5	4	2.19	36276	113.95	52.3	156.6	21.3	78	5.1	90	2.33	236	6.1	92	1.039	128	3.31	3	27	11.11	2	0	1	75	0	0	1	0	1	1	1	0	7.3	1	0	1
7377	20	27	13	4.6	113	6.273	4.6	273.6	0.3	26.5	2	66	1	1	1.37	1603.73	116.92	73.7	153.4	31.32	105.7	6.8	43	1.1	221	5.72	141	1.59	150	3.88	36.7	100	36.7	1	1	1	81	1	1	3	1	2	2	1	0	30	3	1	0
14546	19	23	15	5.36	84	4.663	5.3	315.2	1	88.4	2	74	3	4	3.66	21939.2	59.12	63.5	154.8	26.5	91	5.7	80	2.07	269	6.96	89	1	171	4.42	20	135	14.81	2	0	1	87	1	0	2	0	1	2	3	1	18.51	2	1	1
1728	18	24	22	7.9	100	5.551	8.7	517.5	1.1	97.2	1	77	3	1	0.62	11471.3	69.14	89.8	176.7	28.76	106.1	5.4	39	1	239	6.18	183	2.07	164	4.24	1.4	77	1.82	2	0	1	84	1	0	2	1	1	1	2	0	30	3	1	0
15029	17	17	15	5.36	85	4.718	4.8	285.5	0.9	79.56	2	68	4	2	1.39	4618.81	69.63	76.6	158.3	30.57	106.4	5.6	61	1.58	197	5.09	83	0.94	119	3.08	32.6	157	20.76	1	0	1	91	0	0	3	0	1	1	2	0	27.5	3	1	1
22110	16	22	13	4.64	91	5.05	5	297.4	0.7	61.88	1	71	1	1	1.31	4264.57	98.51	51.8	154.2	21.79	83.6	5.4	63	1.63	164	4.24	62	0.7	89	2.302	9.5	51	18.63	2	0	1	60	0	0	1	0	1	1	1	0	30	3	0	1
30647	16	21	10	3.57	93	5.16	6.2	368.8	0.8	70.72	2	63	4	3	3.2	17721.9	82.74	98.7	160	38.55	107.2	5.7	52	1.34	203	5.25	58	0.655	139	3.595	23	124	18.55	1	0	1	69	1	0	3	0	1	1	2	0	18.51	2	1	1
39621	16	18	54	19.28	101	5.61	8.2	487.7	4.4	388.96	1	78	3	1	2.33	41236.4	13.02	73.4	172.2	24.75	99	5.5	39	1.01	147	3.8	127	1.434	83	2.146	45.2	93	48.6	1	1	1	73	1	0	1	0	2	4	6	1	30	3	0	0
53408	16	21	22	7.85	107	5.94	7.2	428.3	1.24	109.62	1	79	2	1	1.36	9484.03	59.14	72.9	170.7	25.02	99.3	5.9	59	1.53	176	4.55	163	1.84	84	2.172	875	195	448.72	1	0	1	63	1	0	2	1	3	4	3	1	30	3	0	1
32729	15	28	15	5.36	114	6.33	5.7	339	1.3	114.92	2	85	3	3	1.84	28238.1	40.3	66.5	162.4	25.21	97.3	6.4	62	1.6	259	6.7	196	2.213	158	4.086	7.5	44	17.05	2	1	1	68	1	0	2	1	1	3	4	1	24.8	3	1	1
41652	15	22	9	3.21	78	4.33	4.1	243.9	0.63	55.69	2	70	5	5	3.21	39806.3	95.37	64	155.6	26.43	88.9	5.6	64	1.66	205	5.3	134	1.513	114	2.948	6	50	12	1	0	1	83	0	0	2	0	1	1	1	0	21.5	3	1	1
12413	14	24	36	12.85	83	4.607	6.9	410.4	1.2	106.08	2	85	3	5	4.31	9147.26	44.36	58.8	158.6	23.38	96	5.6	88	2.28	258	6.67	141	1.59	142	3.67	7.3	63	11.59	2	0	1	0	0	0	1	1	1	3	4	1	21.5	3	1	1
63363	10	13	10	3.57	90	5	4.8	285.5	0.64	56.58	2	65	5	5	0.75	35475.1	98.01	92.2	158.5	36.7	123.3	5.3	56	1.45	194	5.02	89	1.005	120	3.103	5.8	49	11.84	1	0	1	79	0	0	3	0	1	1	1	0	13.7	2	1	1
21933	9	21	10	3.57	88	4.88	3.3	196.3	0.8	70.72	2	48	4	2	0.96	21285.6	90.83	58	169	20.31	80.3	5.4	57	1.47	230	5.95	210	2.371	131	3.388	4.4	86	5.12	2	0	1	93	0	0	1	1	1	1	1	0	7.3	1	0	1
39638	72	74	4	1.43	96	5.33	5	297.4	0.6	53.04	2	70	3	2	1.02	41045.8	96.5	54.6	155.4	22.61	82	5.3	77	1.99	431	11.15	128	1.445	328	8.482	14.2	17	83.53	2	1	1	67	1	0	1	0	2	2	1	0	30	3	0	1
19218	25	29	29	10.35	98	5.44	4.8	285.5	0.9	79.56	1	58	3	1	3.32	34926.9	99	61.1	152.8	26.17	91.2	5.5	51	1.32	196	5.07	75	0.85	130	3.36	11.7	207	5.65	1	0	1	70	1	0	2	0	1	1	1	0	30	3	0	1
54351	23	22	18	6.43	93	5.16	5.4	321.2	1.07	94.59	2	80	3	3	1.39	33429.8	52.51	59	161	22.76	94.2	5.3	72	1.86	250	6.47	123	1.389	153	3.957	21	71	29.58	1	0	1	51	0	0	1	0	1	2	3	1	27.5	3	1	1
35826	22	23	16	5.71	101	5.61	8.1	481.8	1.6	141.44	1	72	1	2	2.96	3877.55	45.49	75.6	160.2	29.46	100.5	5.8	28	0.72	175	4.53	252	2.845	97	2.508	68.5	142	48.24	1	0	1	85	1	0	2	1	2	3	3	1	30	3	0	0
24757	21	27	17	6.07	98	5.44	5.2	309.3	0.9	79.56	2	82	3	2	3.71	17217.1	63.83	75.1	155.6	31.02	105	5.9	60	1.55	240	6.21	140	1.581	152	3.931	25.4	118	21.53	2	0	1	73	1	0	3	1	1	1	2	0	30	3	1	1
42558	21	23	16	5.71	88	4.88	7	416.4	1.12	99.01	1	79	3	4	5	23204.9	66.82	81.3	170.5	27.97	101.8	5.6	37	0.96	234	6.05	223	2.518	152	3.931	9	84	10.71	1	0	1	60	0	0	2	1	1	1	2	0	30	3	0	0
23598	20	26	16	5.71	81	4.5	7	416.4	0.9	79.56	2	80	5	1	1.44	15654.4	64.63	77.1	148.2	35.1	114	6.1	68	1.76	211	5.46	168	1.897	109	2.819	2.8	41	6.83	1	0	1	58	1	0	3	1	1	1	2	0	24.8	3	1	1
13601	19	15	11	3.93	120	6.661	8	475.8	1.2	106.08	1	49	4	2	0.14	8065.41	74.13	85.7	159.9	33.52	107.8	6.2	36	0.93	248	6.41	182	2.05	176	4.55	18.7	116	16.12	1	1	1	105	1	1	3	1	1	1	2	0	30	3	1	0
32443	19	19	9	3.21	141	7.83	6.2	368.8	0.6	53.04	2	69	3	4	3.11	53648.1	97.1	110.7	162.2	42.08	123	6.6	62	1.6	166	4.29	210	2.371	62	1.603	2.4	50	4.8	1	0	1	85	0	1	3	1	1	1	1	0	18.51	2	1	1
19207	17	29	18	6.43	75	4.163	7.9	469.9	1.6	141.44	1	71	4	3	1.11	5082.39	45.78	78.6	163.6	29.37	92.1	4.4	90	2.33	181	4.68	86	0.97	74	1.91	34.6	105	32.95	2	0	1	92	0	0	2	0	2	3	3	1	30	3	0	1
21541	17	17	12	4.28	105	5.83	6.3	374.7	1.1	97.24	2	61	3	3	3.32	55807.6	57.17	114.2	180.3	35.13	114.5	5.4	33	0.85	171	4.42	217	2.45	95	2.457	6.7	57	11.75	1	0	1	103	1	0	3	1	1	2	3	1	27.5	3	1	0
24463	17	19	16	5.71	92	5.11	2.9	172.5	0.9	79.56	2	59	4	1	1.39	26034.7	73.64	87.6	171.4	29.82	98.7	5.5	69	1.78	258	6.67	74	0.835	174	4.5	17.7	94	18.83	1	0	1	94	0	0	2	0	1	1	2	0	11.7	2	1	1
23914	16	19	18	6.43	101	5.61	8.9	529.4	1.4	123.76	2	81	3	2	1.03	21972.3	37.8	75.7	161.4	29.06	105.6	5.8	47	1.22	209	5.4	170	1.919	128	3.31	5	73	6.85	1	0	1	64	1	0	2	1	1	3	4	1	30	3	1	0
16156	14	20	11	3.93	94	5.218	4.9	291.5	0.7	61.88	2	74	3	4	1.56	20647.7	90.7	52.1	168.5	18.35	76	5.2	81	2.09	214	5.53	111	1.25	111	2.87	30	73	41.1	2	0	1	79	0	0	1	0	2	2	1	0	24.8	3	0	1
35936	10	16	8	2.86	90	5	6.4	380.7	1.2	106.08	1	62	4	3	3.2	6287.29	68.38	84.4	187.1	24.11	98	5.8	53	1.37	221	5.72	88	0.994	150	3.879	41.7	360	11.58	1	0	1	106	1	0	1	0	1	1	2	0	30	3	0	1
59217	10	21	17	6.07	96	5.33	3.8	226	0.74	65.42	2	73	2	1	1.35	10915.1	85.38	44.4	150.5	19.6	70.8	6	50	1.29	214	5.53	90	1.016	146	3.776	39	165	23.64	1	0	1	79	1	0	1	0	1	1	2	0	27.5	3	0	1
38598	89	96	12	4.28	196	10.88	4.5	267.7	0.7	61.88	2	63	1	1	0.85	6246.36	97.12	83.9	158.6	33.35	102.9	9.4	66	1.71	186	4.81	151	1.705	90	2.327	4.5	33	13.64	1	0	1	65	0	1	3	1	1	1	1	0	10	2	1	1
10050	42	43	14	5	98	5.44	6.8	404.5	1	88.4	1	72	3	3	5	13098.5	79.97	82.3	165.8	29.94	102.2	5.5	50	1.29	188	4.86	116	1.31	115	2.97	34	168	20.24	2	0	1	72	1	0	2	0	1	1	2	0	30	3	1	1
58683	37	33	7	2.5	148	8.22	7.8	463.9	0.66	58.34	1	46	3	3	1.36	15419.8	117.14	87.1	183.5	25.87	102.5	6.9	47	1.22	185	4.78	138	1.558	110	2.845	16.3	153	10.65	2	0	1	86	0	1	2	1	1	1	1	0	29.4	3	1	1
43692	32	54	23	8.21	178	9.88	8.5	505.6	1.43	126.41	2	47	4	2	1.3	33193.7	45.52	76.6	162.2	29.12	97.8	5.5	35	0.91	126	3.26	158	1.784	59	1.526	15600	163	9570.55	2	0	1	101	0	1	2	1	3	4	3	1	10	2	1	0
56060	27	37	26	9.28	87	4.83	7.3	434.2	1.32	116.69	1	80	3	1	1.69	17877.3	54.53	72.5	162.8	27.35	108.6	5.2	27	0.7	150	3.88	205	2.314	82	2.121	6.2	77	8.05	2	1	1	68	0	0	2	1	1	2	3	1	30	3	1	0
9077	27	26	11	3.9	90	4.996	4	237.9	0.4	35.4	2	64	1	1	1.82	1083.49	110.45	56.3	143.2	27.46	88.5	5.2	76	1.98	366	9.46	128	1.45	264	6.83	4.9	48	10.21	1	0	1	93	0	0	2	0	1	1	1	0	15.9	2	1	1
41427	25	24	14	5	101	5.61	6.9	410.4	1.1	97.24	1	68	3	3	2.23	63593.8	73.12	110.2	174.1	36.36	128	5.6	39	1.01	196	5.07	240	2.71	109	2.819	11.7	89	13.15	2	0	1	81	0	0	3	1	1	1	2	0	30	3	1	0
58211	24	28	7	2.5	118	6.55	5.6	333.1	1.01	89.28	1	36	4	3	0.91	32821.1	98.85	106.5	175.8	34.46	109.5	5.6	51	1.32	156	4.03	61	0.689	93	2.405	7.6	89	8.54	2	0	1	101	1	0	3	0	1	1	1	0	6.7	1	1	1
46784	23	25	7	2.5	92	5.11	3.5	208.2	0.59	52.16	2	41	1	2	0.47	23128.2	116.04	71.2	150.9	31.27	103.1	5.5	28	0.72	118	3.05	200	2.258	50	1.293	36.7	187	19.63	1	0	1	81	1	0	3	1	1	1	1	0	7.3	1	1	0
51900	23	23	8	2.86	86	4.77	5.2	309.3	0.68	60.11	2	70	4	2	5	18190.2	93.63	101.4	162.2	38.54	123.5	5.9	56	1.45	172	4.45	75	0.847	101	2.612	27.2	103	26.41	1	0	1	75	1	1	3	0	1	1	1	0	30	3	1	1
9268	22	18	17	6.1	98	5.44	7	416.4	0.9	79.6	1	60	3	3	2.71	24824.5	97.78	82.1	177.6	26.03	101.5	5.4	36	0.93	192	4.97	207	2.34	115	2.97	15.3	122	12.54	1	1	1	87	1	0	2	1	1	1	1	0	30	3	0	0
49573	21	34	21	7.5	91	5.05	4.8	285.5	0.92	81.33	2	80	3	4	1.27	29078.1	62.94	47.3	141.2	23.72	79.5	6	69	1.78	273	7.06	120	1.355	180	4.655	23.5	54	43.52	2	0	1	57	1	0	1	0	2	2	2	1	27.5	3	0	1
63389	21	26	12	4.28	99	5.5	4.3	255.8	0.75	66.3	1	80	3	4	1.65	31313.3	91.23	67.6	172.7	22.7	97.1	5.7	83	2.15	215	5.56	74	0.835	117	3.026	6.6	71	9.3	1	0	1	84	1	0	1	0	1	1	1	0	30	3	0	1
11511	20	22	12	4.28	135	7.494	3.6	214.1	0.6	53.04	2	75	3	4	1.63	18243	93.55	77.7	170.3	26.79	106	6.5	45	1.16	247	6.39	378	4.27	126	3.26	5.4	34	15.88	2	0	1	68	0	1	2	1	1	1	1	0	30	3	1	0
30751	20	28	19	6.78	106	5.88	4.4	261.7	1	88.4	1	85	3	5	5	21151.6	73.76	65.6	172.3	22.1	95.1	5.8	55	1.42	173	4.47	103	1.163	97	2.508	8.1	55	14.73	2	0	1	56	1	0	1	0	1	1	2	0	30	3	0	1
55947	20	26	25	8.93	98	5.44	6	356.9	1.34	118.46	1	75	3	3	2.26	38549.2	55.24	65.3	174.9	21.35	90.5	6.1	60	1.55	178	4.6	110	1.242	96	2.483	440	49	897.96	2	0	1	67	1	0	1	0	3	4	3	1	30	3	0	1
62510	20	22	16	5.71	106	5.88	7.7	458	0.87	76.91	2	80	3	3	2.64	62763.5	67.31	81.6	165.6	29.8	99.9	6.1	53	1.37	180	4.65	149	1.682	97	2.508	12.6	117	10.77	2	0	1	85	1	0	2	1	1	1	2	0	30	3	1	1
34877	17	21	12	4.28	92	5.11	8.2	487.7	1.1	97.24	1	54	3	3	1.95	98473.7	79.77	109.8	189.8	30.48	115.8	5	35	0.91	322	8.33	630	7.113	115	2.97	18.3	81	22.59	2	0	1	87	0	0	3	1	1	1	2	0	25.3	3	1	0
7767	17	14	16	5.7	85	4.718	5	297.4	0.6	53	2	72	2	1	1.07	18080.8	95.31	80.5	159.9	31.48	106	5.5	47	1.22	265	6.85	186	2.1	180	4.65	14.6	132	11.06	2	0	1	84	0	0	3	1	1	1	1	0	24.8	3	1	0
2609	15	21	14	5	102	5.662	5.1	303.3	0.6	53	2	74	3	2	2.13	22328.5	94.13	79.14	170.6	27.19	101.5	5.7	72	1.85	192	4.97	142	1.6	92	2.38	9.5	115	8.26	1	0	1	82	1	0	2	1	1	1	1	0	18.51	2	1	1
33543	15	19	13	4.64	124	6.88	3.4	202.2	0.7	61.88	1	76	3	3	3.41	48021	95.49	59.7	169.3	20.83	80.8	5.4	71	1.84	178	4.6	52	0.587	97	2.508	9.1	133	6.84	2	0	1	73	0	1	1	0	1	1	1	0	29.4	3	0	1
63203	15	19	22	7.85	204	11.32	6.7	398.5	1.75	154.7	2	80	3	2	0.9	35334.7	29.1	63.7	151.5	27.8	107	8	35	0.91	231	5.97	419	4.731	115	2.97	78.9	166	47.53	2	1	1	65	0	1	2	1	2	4	5	1	30	3	1	0
13167	14	19	14	5	98	5.44	5.2	309.3	0.7	61.88	1	79	2	1	1.29	11685.2	93.73	73.8	167.3	26.37	102.3	5.5	62	1.6	224	5.79	90	1.02	144	3.72	26.7	87	30.69	1	0	1	65	0	0	2	0	2	2	1	0	30	3	1	1
25890	14	22	30	10.71	79	4.39	4.3	255.8	1.1	97.24	1	51	3	4	5	82128.6	81.27	77.1	157.8	30.96	96.5	5.4	68	1.76	173	4.47	66	0.745	92	2.379	14	127	11.02	2	0	1	97	0	0	3	0	1	1	2	0	13.3	2	0	1
50005	14	19	10	3.57	120	6.66	5.9	350.9	0.64	56.58	1	45	2	2	0.41	25629.5	118.98	97.8	172.4	32.91	107.7	5.9	24	0.62	199	5.15	73	0.824	160	4.138	8.8	134	6.57	2	0	1	90	1	0	3	0	1	1	1	0	15.6	2	1	0
17521	11	14	14	5	106	5.884	5.8	345	0.6	53.04	2	64	3	1	1.16	26236.2	100.17	100.8	162.6	38.13	103.9	5.4	72	1.86	254	6.57	110	1.24	160	4.14	5.7	56	10.18	1	1	1	70	1	0	3	0	1	1	1	0	27.5	3	1	1
6666	10	20	18	6.4	124	6.883	3.3	196.3	0.5	44.2	2	72	1	1	1.35	1680.42	99.59	86.4	157.6	34.79	120.4	5.8	43	1.11	172	4.45	160	1.81	97	2.51	47.9	159	30.13	1	0	1	63	1	0	3	1	2	2	1	0	30	3	1	0
32703	33	31	17	6.07	97	5.38	4.9	291.5	0.9	79.56	1	71	3	5	3.64	27626	91.31	79.9	167.4	28.51	104.3	5.3	45	1.16	163	4.22	154	1.739	87	2.25	4.4	112	3.93	1	1	1	64	1	0	2	1	1	1	1	0	30	3	1	1
31625	31	30	20	7.14	325	18.04	5	297.4	1.1	97.24	1	63	1	1	1.74	4329.1	75.43	77.8	169.2	27.18	100	10.6	39	1.01	321	8.3	823	9.292	115	2.97	6.2	50	12.4	2	0	1	68	0	1	2	1	1	1	2	0	30	3	0	0
15712	26	20	17	6.07	324	17.985	6.9	410.4	1.3	114.92	1	77	3	3	2.02	14330.4	56.58	79.8	164.3	29.56	107.6	11.5	44	1.14	346	8.95	503	5.68	115	2.97	210.5	56	375.89	2	0	1	55	0	1	2	1	3	4	3	1	30	3	1	1
31227	25	26	15	5.36	86	4.77	4.1	243.9	1	88.4	1	64	3	5	5	63955.3	84.05	77	181.7	23.32	88.4	5.2	81	2.09	212	5.48	104	1.174	110	2.845	16.3	85	19.18	2	0	1	83	0	0	1	0	1	1	2	0	25.3	3	0	1
1892	23	28	13	4.6	100	5.551	5.3	315.2	0.7	61.9	2	75	3	4	3.56	20547.9	90.13	71.2	157.1	28.85	102	5.1	84	2.17	212	5.48	73	0.82	114	2.95	28.8	89	32.36	2	0	1	63	1	0	2	0	2	2	1	0	27.5	3	1	1
17197	22	27	17	6.07	126	6.994	5.1	303.3	0.8	70.72	2	72	3	3	5	17185.6	78.24	67.7	165.7	24.66	98.5	6.3	52	1.34	189	4.89	188	2.12	99	2.56	11.1	28	39.64	2	0	1	79	1	1	1	1	2	2	2	1	24.8	3	1	1
33492	22	33	9	3.21	101	5.61	7.7	458	1.1	97.24	1	45	4	3	3.37	25858.4	84.37	141	178.7	44.15	136	6.4	40	1.03	128	3.31	121	1.366	64	1.655	98	223	43.95	2	0	1	79	1	0	3	0	2	2	2	1	15.6	2	1	1
56650	22	23	14	5	94	5.22	4.5	267.7	0.48	42.43	2	60	1	1	0.89	6578.32	108.37	69.5	151.7	30.2	103.2	5.5	65	1.68	237	6.13	127	1.434	147	3.801	3.7	73	5.07	2	0	1	75	0	0	3	0	1	1	1	0	11.7	2	1	1
10447	21	23	16	5.71	113	6.273	6.5	386.6	0.9	79.56	1	60	3	5	5	23426.2	97.78	94.5	177.1	30.13	102.4	5.5	42	1.09	199	5.15	131	1.48	115	2.97	11.1	135	8.22	2	0	1	81	1	0	3	0	1	1	1	0	30	3	1	1
52761	20	22	12	4.28	91	5.05	6.5	386.6	1.03	91.05	1	53	4	5	5	17158.9	86.86	108	177.8	34.16	116.4	5.9	43	1.11	105	2.72	28	0.316	56	1.448	13.7	192	7.14	2	0	1	81	1	0	3	0	1	1	2	0	18.4	2	1	1
49900	19	24	29	10.35	111	6.16	9.8	582.9	1.72	152.05	1	80	3	5	0.17	23307.6	39.69	80.3	181.3	24.43	95.3	5.5	31	0.8	194	5.02	158	1.784	131	3.388	45.9	128	35.86	2	0	1	79	1	0	1	1	2	4	4	1	30	3	0	0
6183	18	22	21	7.5	102	5.662	4.6	273.6	0.7	61.9	1	62	1	1	2.4	1743.95	104.18	67.7	160.4	26.31	91.2	5.5	62	1.61	218	5.64	107	1.21	134	3.47	24	90	26.67	2	0	1	70	1	0	2	0	1	1	1	0	18.4	2	0	1
21864	17	24	20	7.14	87	4.83	4.6	273.6	0.8	70.72	2	78	1	1	1.29	3982.21	75.37	58.6	153.9	24.74	92.2	5.3	53	1.37	249	6.44	244	2.755	147	3.801	17.3	161	10.75	1	1	1	65	0	0	1	1	1	1	2	0	30	3	1	1
28471	16	24	9	3.21	86	4.77	3.5	208.2	0.7	61.88	2	62	3	3	2.4	55807.6	97.73	56.3	157.9	22.58	79.2	5.1	101	2.61	230	5.95	89	1.005	111	2.87	6.3	37	17.03	2	0	1	69	0	0	1	0	1	1	1	0	15.9	2	0	1
5572	15	15	13	4.6	86	4.774	6.5	386.6	0.6	53	2	60	1	1	2.17	1603.73	102.69	60.2	157.6	24.24	81.5	5.2	32	0.84	157	4.06	170	1.92	91	2.35	39.1	79	49.49	1	1	1	79	0	0	1	1	2	2	1	0	24.8	3	0	0
36690	11	18	9	3.21	88	4.88	5.1	303.3	1	88.4	2	85	3	1	1.36	26855.9	55.21	54.5	158	21.83	87.2	5.2	90	2.33	269	6.96	86	0.971	162	4.189	17.9	121	14.79	1	1	1	75	0	0	1	0	1	2	3	1	27.5	3	0	1
31304	58	67	8	2.86	133	7.38	6.8	404.5	0.8	70.72	1	53	1	1	1.46	19361.7	105.82	96.6	176.1	31.15	115.3	5.9	63	1.63	275	7.11	209	2.36	170	4.396	86.4	236	36.61	2	0	1	110	1	1	3	1	2	2	1	0	25.3	3	1	1
15770	39	47	10	3.57	90	4.996	4.7	279.6	0.8	70.72	2	82	1	2	2.26	1477.39	73.52	90.2	156.4	36.88	121.2	5.6	49	1.27	139	3.59	74	0.84	75	1.94	9.1	97	9.38	1	0	1	63	0	0	3	0	1	1	2	0	18.51	2	1	0
61396	36	25	10	3.57	91	5.05	8.1	481.8	0.89	78.68	1	63	5	4	1.01	19315.6	96.29	70.9	167.4	25.3	91	5.7	42	1.09	195	5.04	121	1.366	129	3.336	7.3	32	22.81	2	0	1	91	1	0	2	0	1	1	1	0	30	3	0	1
38220	33	31	19	6.78	159	8.83	4.8	285.5	1	88.4	2	67	3	4	3.41	65328.9	61.75	71	161.7	27.15	95.1	5.8	44	1.14	292	7.55	641	7.237	115	2.97	4.6	44	10.45	2	0	1	85	1	1	2	1	1	1	2	0	30	3	1	0
46392	32	32	28	10	145	8.05	6.3	374.7	1.12	99.01	1	69	2	1	0.69	7297.43	71.11	67.1	167.4	23.94	100	9.4	60	1.55	248	6.41	260	2.935	136	3.517	2350	107	2196.26	2	0	1	55	0	1	1	1	3	3	2	1	30	3	0	1
13833	31	36	21	7.5	102	5.662	5.9	350.9	1	88.4	1	81	1	1	1.46	1570.2	75.61	75.9	170.5	26.11	99.8	6	33	0.85	170	4.4	238	2.69	115	2.97	124.8	105	118.86	1	0	1	57	1	1	2	1	2	2	2	1	30	3	0	0
51266	30	27	12	4.28	106	5.88	6.3	374.7	0.82	72.49	1	67	3	3	2.63	49593.5	96.28	88.7	173.9	29.33	110.4	6.1	36	0.93	284	7.34	566	6.39	115	2.97	14.9	50	29.8	2	0	1	81	1	0	2	1	1	1	1	0	30	3	1	0
6283	30	24	10	3.6	111	6.162	4.4	261.7	0.6	53	1	79	1	1	0.77	1383.02	98.19	73.9	157.5	29.79	104	5.4	57	1.47	192	4.97	173	1.95	101	2.61	24.3	148	16.42	1	0	1	88	1	0	2	1	1	1	1	0	30	3	1	1
17127	28	30	18	6.43	179	9.936	7.1	422.3	1	88.4	1	71	3	3	3.94	13098.5	80.47	89.6	177.6	28.41	102.7	6.7	28	0.72	162	4.19	178	2.01	115	2.97	23.5	222	10.59	2	1	1	75	0	1	2	1	1	1	2	0	30	3	1	0
43709	27	21	13	4.64	106	5.88	6.8	404.5	0.92	81.33	1	51	1	2	1.04	13811.7	100.71	94.2	165.2	34.52	113.8	6	42	1.09	208	5.38	157	1.773	135	3.491	4.5	24	18.75	2	1	1	105	1	0	3	1	1	1	1	0	30	3	1	1
46497	27	27	13	4.64	110	6.11	5.9	350.9	0.92	81.33	1	64	4	2	2.45	7237.07	92.89	85.4	169.1	29.87	103.2	8.8	50	1.29	263	6.8	147	1.66	184	4.758	928	208	446.15	1	0	1	72	1	1	2	1	3	3	1	0	30	3	1	1
36038	26	28	15	5.36	109	6.05	7.8	463.9	1	88.4	1	55	3	5	5	67592.2	88.88	146.2	183.9	43.23	145.8	6.1	39	1.01	207	5.35	213	2.405	125	3.233	22.3	73	30.55	2	0	1	85	1	0	3	1	2	2	2	1	25.3	3	1	0
36155	25	21	7	2.5	106	5.88	5.8	345	0.9	79.56	2	53	4	4	4.49	27793.8	76.44	130.1	169.9	45.07	124.5	6.1	49	1.27	237	6.13	186	2.1	151	3.905	16.5	127	12.99	1	0	1	115	1	0	3	1	1	1	2	0	15.9	2	1	0
56275	25	26	18	6.43	110	6.11	7.2	428.3	1.07	94.59	1	75	3	5	5	36225.9	72.37	95.3	182.6	28.58	113.4	5.8	67	1.73	182	4.71	62	0.7	103	2.664	13.5	131	10.31	2	0	1	61	1	0	2	0	1	1	2	0	30	3	1	1
6303	25	27	16	5.7	83	4.607	3.6	214.1	0.9	79.6	1	73	4	5	4.44	4429.09	90.18	77.6	162	29.57	103.8	4.8	47	1.22	192	4.97	77	0.87	129	3.34	5.7	150	3.8	2	0	1	89	0	0	2	0	1	1	1	0	30	3	1	1
28010	24	29	13	4.64	84	4.66	5.6	333.1	0.7	61.88	2	67	2	1	1.39	24055.4	94.73	67.4	140	34.39	90	5.3	72	1.86	229	5.92	101	1.14	137	3.543	20.1	97	20.72	1	1	1	75	0	0	3	0	1	1	1	0	18.51	2	1	1
852	24	22	17	6.1	107	5.94	7.3	434.2	1	88.4	2	76	3	3	1.6	21818.4	58.39	66.3	148.3	30.15	99.6	5.8	40	1.03	292	7.55	243	2.74	204	5.28	4.1	74	5.54	2	0	1	98	1	0	3	1	1	2	3	1	30	3	1	0
14644	23	24	10	3.57	91	5.051	4.4	261.7	0.7	61.88	2	53	3	5	5	33262.1	103.35	56.2	159.5	22.09	77.2	5.3	74	1.91	196	5.07	66	0.75	109	2.82	3.2	36	8.89	2	0	1	100	0	0	1	0	1	1	1	0	7.3	1	0	1
15640	23	29	8	2.86	95	5.273	4.1	243.9	0.6	53.04	2	70	2	1	0.77	24655.5	96.5	73.9	161.1	28.47	111	5.8	56	1.45	164	4.24	189	2.13	70	1.81	13.7	96	14.27	1	1	1	76	1	0	2	1	1	1	1	0	30	3	1	1
20053	23	30	22	7.85	86	4.774	8.2	487.7	1.7	150.28	1	38	4	2	0.65	14412.6	52.26	85.4	173.7	28.3	96.3	5.8	45	1.16	230	5.95	164	1.85	115	2.97	930	146	636.99	1	1	1	111	1	0	2	1	3	4	3	1	9.4	1	0	1
21562	22	25	6	2.14	97	5.38	5.2	309.3	0.6	53.04	2	66	2	1	0.8	20010.6	98.93	74.4	153	31.78	109.9	5.7	51	1.32	171	4.42	209	2.36	78	2.017	2.8	54	5.19	2	0	1	68	1	0	3	1	1	1	1	0	27.5	3	1	1
37304	22	28	21	7.5	100	5.55	5.1	303.3	1.1	97.24	1	82	3	1	1.27	12867.5	67.02	70.6	171	24.14	88	5.4	45	1.16	157	4.06	89	1.005	94	2.431	8.6	130	6.62	1	0	1	65	1	0	1	0	1	1	2	0	30	3	0	1
53607	22	26	26	9.28	93	5.16	5.8	345	1.14	100.78	1	80	3	2	5	17730.2	65.01	63.8	174.6	20.93	89.4	5.5	61	1.58	199	5.15	90	1.016	120	3.103	16.2	213	7.61	2	0	1	69	0	0	1	0	1	1	2	0	30	3	0	1
56221	21	26	17	6.07	113	6.27	6.2	368.8	0.92	81.33	1	72	5	5	0.25	10364.7	88.38	56.3	165.1	20.65	73.5	5.4	57	1.47	158	4.09	77	0.869	86	2.224	5.2	115	4.52	2	0	1	74	1	0	1	0	1	1	2	0	30	3	0	1
57869	21	21	12	4.28	222	12.32	4.2	249.8	0.55	48.62	2	73	1	1	1.4	9732.25	96.72	59.1	158.4	23.55	94.8	8.7	41	1.06	158	4.09	142	1.603	89	2.302	1.9	47	4.04	2	0	1	54	0	1	1	1	1	1	1	0	24.8	3	1	0
53824	19	28	15	5.36	95	5.27	6	356.9	0.7	61.88	2	74	5	1	1.01	21047.3	90.7	62.1	148.7	28.08	95.9	5.7	77	1.99	195	5.04	90	1.016	100	2.586	9.8	22	44.55	2	0	1	61	1	0	2	0	2	2	1	0	18.51	2	1	1
63673	18	20	13	4.64	100	5.55	5.8	345	0.81	71.6	1	43	3	2	0.97	126790	112.19	113.5	186.3	32.7	112.6	4.8	69	1.78	197	5.09	91	1.027	110	2.845	3.3	32	10.31	2	0	1	114	1	0	3	0	1	1	1	0	11.2	2	1	1
63453	17	23	10	3.57	93	5.16	6.6	392.6	0.71	62.76	1	48	1	1	1.55	46745.7	113.17	100.8	161.9	38.5	123	5.8	53	1.37	215	5.56	166	1.874	129	3.336	1250	52	2403.85	2	1	1	107	1	0	3	1	3	3	1	0	29.4	3	1	1
10396	16	17	11	3.93	94	5.218	6.9	410.4	0.9	79.56	2	60	3	3	2.7	33352.9	73.19	108.7	160.2	42.35	128.2	5.8	49	1.27	282	7.29	201	2.27	193	4.99	8	76	10.53	2	0	1	71	1	0	3	1	1	1	2	0	21.5	3	1	0
14138	16	22	21	7.5	98	5.44	5.3	315.2	1	88.4	2	80	3	4	1.69	7277.19	56.95	44.7	156	18.37	72.2	5.8	88	2.28	246	6.36	109	1.23	136	3.52	3.9	55	7.09	1	0	1	77	1	0	1	0	1	2	3	1	30	3	0	1
34427	16	23	5	1.79	97	5.38	3.9	232	0.7	61.88	2	74	1	1	1	5328.67	90.7	52.8	140.2	26.86	94.4	5.2	84	2.17	216	5.59	94	1.061	113	2.922	16.5	88	18.75	1	0	1	52	1	0	2	0	1	1	1	0	30	3	1	1
10988	15	16	13	4.64	100	5.551	5.7	339	1.1	97.24	1	68	1	1	2.26	1039.8	73.12	75.4	169.6	26.21	95.8	5.6	61	1.58	249	6.44	153	1.73	157	4.06	0.8	42	1.9	2	0	1	91	1	0	2	1	1	1	2	0	29.4	3	0	1
2073	15	28	16	5.7	101	5.607	4	237.9	1	88.4	2	85	3	3	1.82	7800.09	55.21	46.4	156.1	19.04	70.3	5.1	82	2.11	240	6.21	156	1.76	127	3.28	109.7	93	117.96	2	1	1	71	1	0	1	1	2	3	3	1	27.5	3	0	1
27484	15	20	10	3.57	101	5.61	6.4	380.7	0.8	70.72	2	85	3	4	2.78	24402.4	72.16	57.7	153.8	24.39	90.5	5.3	73	1.89	201	5.2	173	1.953	93	2.405	17.2	37	46.49	2	0	1	79	1	0	1	1	2	2	2	1	18.51	2	1	1
18782	14	18	19	6.78	141	7.827	7.5	446.1	1.1	97.24	2	85	3	3	2.03	7277.19	49.24	68.7	149.3	30.82	98.7	6.4	63	1.63	232	6	131	1.48	143	3.7	8.4	70	12	2	0	1	73	1	1	3	0	1	2	3	1	30	3	1	1
22573	14	25	18	6.43	101	5.61	6.8	404.5	1.1	97.24	2	85	3	4	3.66	19499.5	49.24	57.8	149	26.03	87.1	5.5	50	1.29	150	3.88	106	1.197	79	2.043	17.1	145	11.79	1	0	1	83	0	0	2	0	1	2	3	1	24.8	3	0	1
35549	14	20	8	2.86	122	6.77	3.6	214.1	0.6	53.04	2	70	1	3	1.94	9128.33	96.5	61.4	158.7	24.38	80.5	5.4	52	1.34	230	5.95	124	1.4	153	3.957	16.1	73	22.05	2	0	1	69	1	0	1	0	1	1	1	0	24.8	3	0	1
35686	14	16	24	8.57	146	8.1	5.5	327.1	1.2	106.08	2	54	3	3	0.46	46631	53.79	92.4	162.2	35.12	108.3	6.8	65	1.68	337	8.71	240	2.71	224	5.793	17.2	119	14.45	1	1	1	59	0	1	3	1	1	2	3	1	24.8	3	1	1
55544	14	22	21	7.5	93	5.16	6.1	362.8	1.1	97.24	2	80	3	3	4.92	31907.4	50.8	60.4	149.7	26.95	100.9	5.6	58	1.5	259	6.7	219	2.473	157	4.06	35.8	81	44.2	1	0	1	64	0	0	2	1	2	3	3	1	30	3	1	1
15203	13	22	15	5.36	97	5.384	4.9	291.5	0.9	79.56	2	67	3	4	3.77	27464.9	70.07	56.5	164.1	20.98	88.1	5.5	67	1.73	252	6.52	223	2.52	140	3.62	52.5	138	38.04	2	0	1	83	1	0	1	1	2	2	2	1	15.9	2	1	1
45366	12	15	17	6.07	135	7.49	6.1	362.8	0.82	72.49	2	75	4	2	1.76	11413.5	74.55	110.1	168.6	38.73	130.6	5.9	56	1.45	169	4.37	64	0.723	100	2.586	52.6	147	35.78	1	0	1	89	1	1	3	0	2	2	2	1	30	3	1	1
56725	12	25	14	5	89	4.94	8.4	499.6	1.13	99.89	1	73	3	3	0.54	28245.8	68.63	113.3	177.7	35.88	126	6.8	40	1.03	224	5.79	239	2.698	136	3.517	5.7	74	7.7	2	0	1	75	0	1	3	1	1	1	2	0	30	3	1	1
29214	11	18	19	6.78	204	11.32	5.2	309.3	0.9	79.56	1	85	4	2	1.66	10584.6	83.7	51.4	171.7	17.44	77	9.6	94	2.43	206	5.33	78	0.881	96	2.483	58.5	140	41.79	1	0	1	80	0	1	1	0	2	2	2	1	30	3	0	1
18801	45	52	11	3.93	109	6.051	5.1	303.3	0.7	61.88	2	60	3	3	5	29685	98.95	98.4	157.3	39.77	112.5	5.7	47	1.22	175	4.53	141	1.59	100	2.59	4.6	133	3.46	2	0	1	79	1	0	3	1	1	1	1	0	13.7	2	1	0
35521	43	29	10	3.57	96	5.33	7.7	458	1	88.4	1	25	4	3	1.74	31256.4	107.12	180.2	196.7	46.57	142.4	5.3	51	1.32	213	5.51	83	0.937	145	3.75	35.3	200	17.65	2	0	1	70	0	0	3	0	1	1	1	0	3.3	1	1	1
37494	29	20	21	7.5	161	8.94	4.6	273.6	1	88.4	1	62	3	3	3.73	51549.6	85.1	101.9	172.1	34.4	122	7.8	48	1.24	164	4.24	122	1.377	92	2.379	89	144	61.81	2	1	1	77	0	1	3	0	2	2	2	1	30	3	1	1
36909	28	23	10	3.57	109	6.05	5.1	303.3	0.8	70.72	2	40	1	4	3.1	18093.4	95.46	105.3	159.2	41.55	119.2	5.9	50	1.29	191	4.94	159	1.795	109	2.819	291	101	288.12	2	0	1	107	1	0	3	1	2	2	1	0	6.3	1	1	1
38937	28	38	8	2.86	102	5.66	7.3	434.2	0.9	79.56	2	61	4	2	0.84	13643.8	72.73	90.9	170.3	31.34	120.9	7.1	40	1.03	214	5.53	467	5.272	115	2.97	6.3	21	30	2	0	1	61	1	1	3	1	2	2	2	1	27.5	3	1	0
9793	27	27	11	3.9	92	5.107	7.1	422.3	0.9	79.6	1	61	4	4	3.29	5730.84	97.17	65	171.1	22.2	85	5.9	34	0.87	190	4.91	340	3.84	88	2.28	82.7	108	76.57	2	0	1	83	1	0	1	1	2	2	1	0	30	3	0	0
23435	24	26	23	8.21	101	5.61	3.9	232	1	88.4	1	76	3	5	4.13	42473.4	78	121.1	180.4	37.21	132.2	5.6	43	1.11	234	6.05	214	2.416	148	3.827	427	187	228.34	2	1	1	86	1	1	3	1	2	2	2	1	30	3	1	1
52458	24	24	11	3.93	99	5.5	6.1	362.8	0.76	67.18	1	64	4	3	2.55	12897.3	100.37	99.3	172.7	33.29	107.2	5.6	75	1.94	240	6.21	60	0.677	153	3.957	4.2	138	3.04	2	0	1	78	1	0	3	0	1	1	1	0	29.4	3	1	1
53102	21	23	12	4.28	115	6.38	5.5	327.1	1.09	96.36	1	75	3	2	2.75	40574.7	70.78	107	173.1	35.71	121.9	5.7	41	1.06	202	5.22	142	1.603	133	3.439	11.8	198	5.96	2	0	1	81	1	0	3	1	1	1	2	0	30	3	1	1
2412	19	16	12	4.3	100	5.551	5.5	327.1	0.5	44.2	2	48	1	2	1.41	5965.34	115.62	65.2	147.6	29.93	101.8	5.5	41	1.06	219	5.66	227	2.56	133	3.44	99.1	87	113.91	2	0	1	93	1	0	2	1	2	2	1	0	15.9	2	1	0
43030	17	22	10	3.57	87	4.83	8.6	511.5	1.03	91.05	1	72	3	3	1.15	10475.8	77.18	93.2	173.7	30.89	110.2	6	73	1.89	213	5.51	179	2.021	104	2.689	32.3	117	27.61	2	0	1	87	1	0	3	1	1	1	2	0	30	3	1	1
43614	16	41	8	2.86	88	4.88	7.2	428.3	1.23	108.73	1	64	3	3	1.35	58859.1	65.56	77.1	172.5	25.91	95.3	5.1	64	1.66	248	6.41	130	1.468	158	4.086	5.6	187	2.99	2	0	1	87	0	0	2	0	1	1	2	0	30	3	0	1
27166	15	22	10	3.57	100	5.55	5	297.4	0.9	79.56	1	81	3	5	1.92	23023.5	85.8	90.5	172.3	30.48	115.5	5.6	59	1.53	181	4.68	155	1.75	91	2.353	1.1	70	1.57	1	0	1	66	1	0	3	1	1	1	2	0	30	3	1	1
30194	15	15	2	0.71	95	5.27	5.9	350.9	0.7	61.88	2	66	4	1	0.54	13050.5	95.32	58.7	153.9	24.78	101.1	5.9	65	1.68	232	6	68	0.768	153	3.957	1.2	26	4.62	1	0	1	80	1	0	1	0	1	1	1	0	13.7	2	1	1
30287	14	19	12	4.28	76	4.22	4.3	255.8	0.9	79.56	2	76	1	1	0.99	4289.96	66.26	57.7	151.1	25.27	92	5.2	46	1.19	254	6.57	164	1.852	175	4.526	3	35	8.57	1	0	1	80	0	0	2	1	1	1	2	0	30	3	1	0
33153	14	22	13	4.64	109	6.05	5.8	345	1	88.4	1	82	3	5	5	21792.4	75.14	92.5	176.7	29.63	116.7	5.9	62	1.6	167	4.32	120	1.355	81	2.095	40	118	33.9	2	1	1	71	1	1	2	0	2	2	2	1	30	3	1	1
43016	13	15	10	3.57	84	4.66	3.8	226	0.85	75.14	2	73	3	3	2.1	44662.2	72.3	50.3	151.5	21.92	78.5	5.4	48	1.24	201	5.2	147	1.66	124	3.207	0.6	14	4.29	1	0	1	77	0	0	1	1	1	1	2	0	30	3	0	0
2029	156	90	11	3.9	98	5.44	8	475.8	0.7	61.9	1	41	3	2	0.6	20296.1	118.72	91	176.3	29.28	109.2	5.4	37	0.95	190	4.91	100	1.13	133	3.44	2.4	23	10.43	2	0	1	98	1	0	2	0	1	1	1	0	18.4	2	1	0
45368	110	122	12	4.28	156	8.66	7.3	434.2	0.82	72.49	1	50	2	2	1.47	9970.34	107.02	69.4	170.5	23.87	91.8	6.9	20	0.52	196	5.07	464	5.239	115	2.97	22.8	197	11.57	2	0	1	77	0	1	1	1	1	1	1	0	18.4	2	0	0
44579	56	51	7	2.5	142	7.88	8.4	499.6	0.89	78.68	1	59	4	3	0.57	25798.1	98.72	93.2	189	26.09	104.2	6.6	73	1.89	257	6.65	81	0.914	168	4.344	1258	217	579.72	2	1	1	89	0	1	2	0	3	3	1	0	25.3	3	1	1
1436	39	54	16	5.7	88	4.885	5.8	345	0.6	53	2	73	1	1	0.8	1541.12	94.72	81.5	149.2	36.61	123	5.5	47	1.21	205	5.3	190	2.15	120	3.1	53.5	70	76.43	1	0	1	31	0	0	3	1	2	2	1	0	21.5	3	1	0
45724	35	34	19	6.78	198	10.99	5.4	321.2	1.23	108.73	1	73	4	4	3.38	12184.2	61.99	86.1	182.8	25.77	100.3	8.1	48	1.24	168	4.34	115	1.298	97	2.508	101	77	131.17	1	1	1	71	0	1	2	0	2	2	2	1	30	3	0	1
14458	31	20	18	6.43	99	5.495	8.9	529.4	0.8	70.72	2	59	3	4	4.48	38116.4	84.82	117.5	160.9	45.39	112.8	5.5	62	1.6	232	6	148	1.67	140	3.62	43.4	102	42.55	2	0	1	83	0	0	3	1	2	2	2	1	15.9	2	1	1
46293	30	25	11	3.93	124	6.88	6.2	368.8	0.97	85.75	1	68	1	1	2.71	7799.13	85.03	75.4	172.4	25.37	97.3	6.2	40	1.03	175	4.53	150	1.694	105	2.715	8.1	116	6.98	2	1	1	91	1	1	2	1	1	1	2	0	30	3	0	1
52607	30	26	14	5	103	5.72	5	297.4	0.98	86.63	1	52	1	2	1.46	10114.5	92.78	83.5	162.5	31.62	102.3	5.8	38	0.98	196	5.07	130	1.468	132	3.414	99.7	148	67.36	2	0	1	101	1	0	3	0	2	2	1	0	15.6	2	1	0
39588	29	38	10	3.57	110	6.11	6.6	392.6	1.1	97.24	1	61	3	4	3.48	74056.8	76.37	100	178.9	31.24	108	5.4	66	1.71	190	4.91	92	1.039	106	2.741	95.7	128	74.77	2	1	1	69	1	0	3	0	2	2	2	1	30	3	1	1
43297	29	29	14	5	103	5.72	6.7	398.5	0.82	72.49	1	67	1	1	1.75	5524.58	96.28	90.4	169.4	31.5	113.9	5.4	52	1.34	211	5.46	150	1.694	129	3.336	5.4	56	9.64	1	0	1	89	1	0	3	1	1	1	1	1	30	3	1	1
1625	28	27	18	6.4	109	6.051	4	237.9	0.5	44.2	2	85	1	1	1.36	2246.74	91.85	52.9	141.9	26.27	96.5	5.2	76	1.95	199	5.15	77	0.87	108	2.79	23.5	86	27.33	1	0	1	70	1	0	2	0	1	1	1	0	21.5	3	1	1
28083	28	24	26	9.28	284	15.76	9.7	577	1.3	114.92	2	58	4	3	4.54	28164	47.66	117.7	175	38.43	124.5	12.9	92	2.38	309	7.99	211	2.382	175	4.526	780.5	101	772.77	2	1	1	85	0	1	3	1	3	4	3	1	18.51	2	1	1
41191	27	25	9	3.21	95	5.27	6.4	380.7	1	88.4	1	48	3	3	0.77	80913.5	92.84	103.2	181	31.5	108.4	5.4	32	0.83	151	3.9	258	2.913	67	1.733	42.9	224	19.15	2	0	1	101	0	0	3	1	1	1	1	0	30	3	1	0
57624	27	24	8	2.86	107	5.94	6	356.9	0.81	71.6	2	63	4	4	5	20723.8	81.52	80.1	162.3	30.41	103.2	6.1	67	1.73	269	6.96	87	0.982	185	4.784	4.4	28	15.71	2	0	1	74	1	0	3	0	1	1	2	0	18.51	2	1	1
2696	26	27	23	8.2	91	5.051	6.2	368.8	0.9	79.6	2	84	4	4	3.08	7111.25	63.04	65.7	158.5	26.15	101.6	6	44	1.14	263	6.8	74	0.84	204	5.28	126.8	203	62.46	2	1	1	77	1	0	2	0	2	2	2	1	30	3	1	0
58653	26	26	13	4.64	85	4.72	5.2	309.3	1.15	101.66	1	55	4	2	1.63	27005.2	75.16	71.7	175.7	23.23	91.8	5.8	50	1.29	169	4.37	94	1.061	100	2.586	22.2	349	6.36	2	0	1	81	1	0	1	0	1	1	2	0	30	3	0	1
58764	26	25	19	6.78	136	7.55	4.7	279.6	0.9	79.56	1	67	3	3	3.77	55161.2	93.61	92.7	167.8	32.92	114.5	7	46	1.19	219	5.66	228	2.574	127	3.284	20.9	141	14.82	2	0	1	52	0	1	3	1	1	1	1	0	30	3	1	1
15262	25	36	12	4.28	86	4.774	7	416.4	1.4	123.76	1	81	3	2	0.81	4469.96	50.49	71.9	177.9	22.72	92	5	46	1.19	222	5.74	263	2.97	115	2.97	20.8	207	10.05	2	0	1	69	0	0	1	1	1	2	3	1	30	3	0	1
2929	24	24	14	5	202	11.213	3.2	190.3	0.4	35.4	2	61	1	1	4.52	1871.33	112.53	81.5	171.4	27.74	105.5	7.3	45	1.18	169	4.37	129	1.46	98	2.53	2.1	94	2.23	1	0	1	72	0	1	2	0	1	1	1	0	30	3	1	0
49938	24	34	22	7.85	226	12.55	8.2	487.7	1.09	96.36	2	80	4	3	2.56	11192	51.36	62.1	150.9	27.27	104.2	8.5	66	1.71	147	3.8	70	0.79	67	1.733	475	110	431.82	1	1	1	79	0	1	2	0	3	4	3	1	18.51	2	1	1
46619	23	25	14	5	99	5.5	4.4	261.7	0.92	81.33	1	79	3	3	3.14	35880.5	84.62	81.6	170.8	27.97	106.8	5.3	42	1.09	148	3.83	211	2.382	64	1.655	5.9	147	4.01	1	0	1	53	1	0	2	1	1	1	2	0	30	3	1	1
61327	23	28	7	2.5	137	7.6	5.2	309.3	0.5	44.2	2	56	3	1	1.47	26933.6	110.01	69.2	150.7	30.47	99	5.8	45	1.16	162	4.19	101	1.14	97	2.508	9	52	17.31	1	1	1	83	1	1	3	0	1	1	1	0	18.51	2	1	0
2084	22	34	12	4.3	104	5.773	9	535.3	1	88.4	1	76	4	3	1.72	5162.75	78	82.8	172.2	27.92	107.4	5.9	34	0.89	217	5.61	199	2.25	143	3.7	22.9	126	18.17	1	0	1	82	1	0	2	1	1	1	2	0	30	3	1	0
30807	22	21	11	3.93	103	5.72	5.4	321.2	0.7	61.88	2	65	1	1	0	4547.04	95.92	83	155.1	34.5	107.7	6.2	48	1.24	198	5.12	160	1.806	118	3.051	28.3	101	28.02	1	0	1	76	1	0	3	1	1	1	1	0	15.9	2	1	0
36725	21	23	18	6.43	89	4.94	4.7	279.6	1	88.4	2	69	3	3	2.51	68114.6	60.98	67.4	150.9	29.6	90.4	5.7	70	1.81	209	5.4	97	1.095	120	3.103	12.1	142	8.52	1	0	1	72	1	0	2	0	1	1	2	0	18.51	2	1	1
48561	21	24	14	5	157	8.72	6.3	374.7	0.73	64.53	2	78	3	2	0.41	23231.8	84.12	103.8	160.6	40.24	113	6.9	49	1.27	151	3.9	190	2.145	64	1.655	31.3	33	94.85	2	1	1	57	0	1	3	1	2	2	2	1	30	3	1	0
61890	21	22	8	2.86	98	5.44	9.2	547.2	0.77	68.07	1	50	1	3	1.17	7855.98	109.07	136	167.4	48.53	136.7	6	38	0.98	219	5.66	227	2.563	136	3.517	21.7	102	21.27	2	0	1	93	1	0	3	1	1	1	1	0	18.4	2	1	0
14975	20	26	15	5.36	100	5.551	6.6	392.6	0.7	61.88	2	65	1	1	2.5	1530.04	95.92	62.8	152.9	26.86	85.8	6	44	1.14	242	6.26	274	3.09	143	3.7	13.9	79	17.59	2	0	1	83	1	0	2	1	1	1	1	0	30	3	0	0
42632	20	24	21	7.5	87	4.83	6.1	362.8	0.92	81.33	2	65	3	4	5	59356.4	69.1	75	165.5	27.38	94	5.7	56	1.45	223	5.77	170	1.919	133	3.439	2.2	50	4.4	2	1	1	92	1	0	2	1	1	1	2	0	21.5	3	1	1
15642	19	16	23	8.21	195	10.824	4.6	273.6	0.5	44.2	2	66	1	1	2.5	1760.08	103.38	81.7	147.6	37.5	119.2	8.2	47	1.22	237	6.13	127	1.43	165	4.27	2380	41	5804.88	1	0	1	76	0	1	3	0	3	3	1	0	24.8	3	1	0
47420	18	19	12	4.28	78	4.33	6.8	404.5	0.8	70.72	1	50	2	3	3.13	14772.3	107.82	61.7	173.3	20.54	87.9	5.6	37	0.96	213	5.51	149	1.682	146	3.776	5.7	114	5	2	0	1	89	0	0	1	1	1	1	1	0	30	3	0	0
13660	17	21	19	6.78	103	5.718	5.7	339	0.9	79.56	2	81	3	4	3.21	7753.28	64.23	70	163.1	26.31	94.6	5.7	109	2.82	228	5.9	127	1.43	94	2.43	10.8	139	7.77	2	0	1	70	1	0	2	0	1	1	2	0	30	3	1	1
46129	15	16	31	11.07	120	6.66	5.4	321.2	1.22	107.85	2	64	2	2	1.17	5147.15	49.56	94.6	154.4	39.68	126.4	7.3	43	1.11	184	4.76	150	1.694	111	2.87	1012	62	1632.26	1	1	1	51	0	1	3	1	3	4	3	1	21.5	3	1	0
60975	15	20	26	9.28	127	7.05	6.9	410.4	2.05	181.22	1	80	3	3	3.43	21378.3	32.15	82.1	164.8	30.23	102.4	7	39	1.01	140	3.62	99	1.118	81	2.095	271.2	124	218.71	2	1	1	55	0	1	3	0	2	4	4	1	30	3	1	0
43204	14	24	10	3.57	89	4.94	3.5	208.2	0.52	45.97	2	80	1	2	1.87	9634.11	93.86	58.4	153.9	24.66	93.9	5.4	62	1.6	174	4.5	81	0.914	96	2.483	6.9	51	13.53	1	0	1	27	0	0	1	0	1	1	1	0	27.5	3	1	1
23498	13	21	14	5	87	4.83	4.1	243.9	0.9	79.56	2	68	1	3	1.12	4547.04	69.63	59	155.2	24.49	84.2	5.6	96	2.48	222	5.74	84	0.948	109	2.819	5.6	43	13.02	2	0	1	70	0	0	1	0	1	1	2	0	13.7	2	0	1
27671	13	20	16	5.71	85	4.72	4.6	273.6	1	88.4	2	62	3	3	3.92	50928	63.7	54.6	152.7	23.42	76.3	5.2	91	2.35	301	7.78	247	2.789	161	4.163	124.1	51	243.33	1	1	1	99	0	0	1	1	2	2	2	1	30	3	0	1
44298	13	20	19	6.78	75	4.16	10.8	642.4	1.94	171.5	1	61	4	2	2.06	6206.2	38.66	98.5	176.5	31.62	113.4	5.6	74	1.91	174	4.5	35	0.395	93	2.405	21.5	144	14.93	2	0	1	94	0	0	3	0	1	3	4	1	21.6	3	1	1
65331	13	17	11	3.93	97	5.38	4.8	285.5	0.64	56.58	2	54	4	4	0.81	16741	104.95	114.8	177.9	36.3	116.9	5.7	57	1.47	247	6.39	69	0.779	176	4.551	22.4	126	17.78	1	0	1	78	1	0	3	0	1	1	1	0	11.7	2	1	1
14739	12	24	17	6.07	126	6.994	5.9	350.9	1	88.4	2	85	3	2	1.76	11313.5	55.21	65.1	163.8	24.26	93.2	6	58	1.5	157	4.06	89	1	81	2.09	1.3	20	6.5	1	1	1	22	1	1	1	0	1	2	3	1	21.5	3	1	1
62418	9	16	27	9.64	107	5.94	7.6	452	2.87	253.71	1	80	3	1	1.98	46965.8	21.47	70.1	172.6	23.5	101.9	5.5	37	0.96	172	4.45	212	2.393	93	2.405	300	94	319.15	1	1	1	67	1	0	1	1	3	4	5	1	30	3	0	0
45194	96	177	11	3.93	100	5.55	6.1	362.8	0.92	81.33	1	40	3	3	0.58	22505.4	107.84	74.3	169	26.01	92	4.4	35	0.91	140	3.62	157	1.773	74	1.914	9.5	40	23.75	2	0	1	88	1	0	2	1	1	1	1	0	15.6	2	0	0
53268	31	32	16	5.71	84	4.66	7.8	463.9	0.95	83.98	2	71	3	2	3.23	46439	64.05	109.6	150.8	48.2	123.7	5.6	71	1.84	181	4.68	102	1.152	90	2.327	9.7	139	6.98	1	0	1	56	0	0	3	0	1	1	2	0	18.51	2	1	1
10453	26	18	12	4.28	101	5.607	6.8	404.5	0.8	70.72	2	70	2	1	1.68	22284.1	79.22	73.9	147.3	34.06	105	6.3	40	1.03	192	4.97	265	2.99	99	2.56	24.4	152	16.05	1	0	1	77	1	0	3	1	1	1	2	0	21.5	3	1	0
8497	25	24	16	5.7	126	6.994	8.5	505.6	0.9	79.6	1	75	1	1	1.05	1104.5	89.07	80.5	160.4	31.29	106.5	6.1	36	0.93	187	4.84	177	2	116	3	196.5	60	327.5	1	1	1	103	1	1	3	1	3	3	2	1	30	3	1	0
21610	24	28	24	8.57	127	7.05	5.7	339	1.3	114.92	1	75	5	4	2.42	29885.9	57.29	56.5	161.1	21.77	83.5	7.4	84	2.17	214	5.53	120	1.355	106	2.741	47.6	83	57.35	1	0	1	67	1	1	1	0	2	3	3	1	30	3	0	1
47004	24	18	11	3.93	91	5.05	5.9	350.9	0.92	81.33	1	39	4	3	2.78	15606.8	108.52	101.4	174	33.49	109.8	5.3	28	0.72	191	4.94	167	1.885	130	3.362	7	43	16.28	2	0	1	91	0	0	3	1	1	1	1	0	18.4	2	1	0
51572	24	24	25	8.93	103	5.72	6.5	386.6	1.24	109.62	2	77	3	3	1.54	26962.2	44.82	74.4	151.4	32.46	104.3	6.1	72	1.86	200	5.17	67	0.756	115	2.974	24.7	42	58.81	2	1	1	63	1	1	3	0	2	4	4	1	15.9	2	1	1
51384	23	21	16	5.71	98	5.44	6.8	404.5	0.87	76.91	2	75	3	2	1.64	36091.2	69.44	134.3	163.1	50.49	131.9	5.5	51	1.32	181	4.68	220	2.484	86	2.224	8.6	136	6.32	1	0	1	69	1	0	3	1	1	1	2	0	30	3	1	1
59659	22	28	15	5.36	104	5.77	7	416.4	1.1	97.24	1	80	3	5	4.12	18987.4	67.86	97.8	178.7	30.63	119	5.9	42	1.09	164	4.24	88	0.994	104	2.689	70.2	99	70.91	2	0	1	96	1	0	3	0	2	2	2	1	30	3	1	1
14786	20	14	15	5.36	120	6.661	6.2	368.8	0.9	79.56	2	60	1	4	0.96	1849.33	73.19	82	158.1	32.81	106	6.1	49	1.27	233	6.03	124	1.4	159	4.11	10.1	95	10.63	2	0	1	85	1	1	3	0	1	1	2	0	30	3	1	0
20893	18	32	11	3.93	87	4.829	8	475.8	1	88.4	1	53	3	4	1.84	40312.9	90	88.2	184	26.05	105.2	4.9	33	0.85	175	4.53	733	8.28	115	2.97	20.1	86	23.37	2	0	1	92	0	0	2	1	1	1	1	0	30	3	1	0
29520	18	19	22	7.85	180	9.99	5.7	339	0.9	79.56	1	73	1	1	0.69	4264.57	90.18	84.5	169.8	29.31	107.8	7.6	49	1.27	154	3.98	91	1.027	87	2.25	190.5	197	96.7	2	0	1	54	0	1	2	0	2	2	1	0	30	3	1	1
21954	17	26	12	4.28	89	4.94	6.1	362.8	1.1	97.24	2	73	3	5	5	40585.3	53.06	65.7	164.7	24.22	92.8	5.5	72	1.86	225	5.82	179	2.021	117	3.026	4.3	37	11.62	1	0	1	68	0	0	1	1	1	2	3	1	24.8	3	1	1
30756	17	23	15	5.36	96	5.33	6.8	404.5	0.9	79.56	2	81	3	4	2.36	20755	64.23	70.7	160.6	27.41	92.5	5.5	108	2.79	276	7.14	115	1.298	145	3.75	9.5	69	13.77	1	0	1	83	1	0	2	0	1	1	2	0	30	3	1	1
64625	16	20	8	2.86	136	7.55	4	237.9	1.02	90.17	1	69	4	2	1.39	8491.29	79.56	79	174.3	26	95.8	7	52	1.34	152	3.93	78	0.881	84	2.172	64	306	20.92	1	0	1	69	0	1	2	0	1	1	2	0	18.4	2	0	1
59739	15	20	17	6.07	153	8.49	6.5	386.6	0.83	73.37	2	76	1	4	1.75	9056.24	73.02	57.6	155	23.98	87.5	6.9	67	1.73	151	3.9	73	0.824	69	1.784	437.5	25	1750	1	0	1	45	0	1	1	0	3	3	2	1	18.51	2	0	1
63589	15	26	35	12.5	176	9.77	7.5	446.1	1.41	124.64	1	80	5	1	1.26	12882.9	50.38	59.5	155	24.8	94.5	6.8	50	1.29	173	4.47	118	1.332	99	2.56	37	102	36.27	2	0	1	59	0	1	1	0	2	3	3	1	30	3	1	1
63813	14	19	12	4.28	142	7.88	5.3	315.2	0.8	70.72	1	67	4	5	1.38	6016.51	97	67.6	166.7	24.3	94.9	6.7	59	1.53	171	4.42	46	0.519	103	2.664	18.4	38	48.42	2	0	1	74	0	1	1	0	2	2	1	0	21.6	3	0	1
63326	13	16	10	3.57	105	5.83	6.2	368.8	0.84	74.26	2	51	4	2	1.36	11574.2	84.08	93.5	155	38.9	114.4	5.9	32	0.83	221	5.72	163	1.84	156	4.034	9.4	138	6.81	2	0	1	89	1	0	3	1	1	1	2	0	15.9	2	1	0
49413	49	47	12	4.28	101	5.61	3.6	214.1	0.53	46.85	2	69	1	1	1.06	4379.64	100.05	60.8	148.2	27.68	88.7	5.9	53	1.37	192	4.97	167	1.885	106	2.741	1.5	23	6.52	1	0	1	79	1	0	2	1	1	1	1	0	11.7	2	1	1
49416	41	25	23	8.21	132	7.33	5.9	350.9	0.82	72.49	1	61	3	5	4.75	63205.8	99.94	101.2	166.8	36.37	118.7	7.1	39	1.01	196	5.07	327	3.692	92	2.379	25.2	92	27.39	2	1	1	73	0	1	3	1	1	1	1	0	29.4	3	1	0
55180	36	36	14	5	187	10.38	7.4	440.2	1.45	128.18	1	62	4	5	5	13121.8	54.48	121.7	186.5	34.99	115.1	6.6	42	1.09	174	4.5	114	1.287	109	2.819	2.7	109	2.48	2	0	1	75	0	1	3	0	1	2	3	1	30	3	1	1
33192	32	28	9	3.21	94	5.22	5.9	350.9	0.8	70.72	2	47	3	4	1.2	41274.6	91.4	82.3	163.9	30.64	108.3	5	86	2.22	190	4.91	135	1.524	77	1.991	40.2	95	42.32	2	0	1	86	1	0	3	1	2	2	1	0	7.3	1	1	1
63741	32	43	12	4.28	95	5.27	5.6	333.1	0.91	80.44	1	72	1	3	1.39	21815.9	89.55	79.6	176.1	25.7	101	5.2	106	2.74	241	6.23	89	1.005	117	3.026	6.5	186	3.49	2	0	1	72	0	0	2	0	1	1	2	0	30	3	0	1
33478	31	33	13	4.64	99	5.5	4.8	285.5	0.9	79.56	2	70	3	5	5	42824	68.77	60.5	158.9	23.96	89.3	5.6	61	1.58	256	6.62	129	1.456	169	4.37	11.3	80	14.13	1	0	1	67	0	0	1	0	1	1	2	0	24.8	3	1	1
59106	30	31	12	4.28	106	5.88	4.8	285.5	1.08	95.47	1	72	5	5	2.06	9926.84	72.91	64.5	163.1	24.25	87.3	5.7	59	1.53	193	4.99	119	1.344	110	2.845	2	38	5.26	2	0	1	57	1	0	1	0	1	1	2	0	30	3	0	1
7620	30	24	23	8.2	88	4.885	5.4	321.2	0.9	79.6	1	64	3	3	5	24004.5	95.37	87.9	171.2	29.99	108.4	5.5	43	1.11	234	6.05	121	1.37	167	4.32	5	93	5.38	1	0	1	69	0	0	2	0	1	1	1	0	30	3	1	1
33895	29	30	9	3.21	117	6.49	5.7	339	0.7	61.88	2	64	4	4	3.9	16730.4	96.52	80.2	162.9	30.22	103.2	6	54	1.4	207	5.35	137	1.547	126	3.258	12.5	193	6.48	2	0	1	75	1	0	3	1	1	1	1	0	15.9	2	1	1
31593	28	29	9	3.21	111	6.16	4.9	291.5	0.7	61.88	2	58	1	3	5	23957.8	100.19	76.8	163.8	28.62	98	5.4	40	1.03	183	4.73	251	2.834	93	2.405	26.6	122	21.8	2	0	1	71	1	0	2	1	1	1	1	0	24.8	3	1	0
11402	26	24	19	6.78	147	8.16	5.5	327.1	0.9	79.56	2	77	3	4	2.79	21939.2	65.84	79.1	167.2	28.29	97.8	6.8	61	1.58	183	4.73	113	1.28	99	2.56	13.1	110	11.91	1	1	1	61	0	1	2	0	1	1	2	0	30	3	1	1
37708	26	21	11	3.93	96	5.33	7.1	422.3	0.9	79.56	1	54	3	3	0	29577.9	101.49	85.6	173.6	28.4	107.5	5.2	45	1.16	242	6.26	102	1.152	177	4.577	27.6	152	18.16	1	0	1	69	1	0	2	0	1	1	1	0	30	3	1	1
60429	26	25	15	5.36	91	5.05	5.5	327.1	0.81	71.6	1	40	2	3	5	22971.2	114.31	103.6	167.9	36.75	119.6	5.2	50	1.29	209	5.4	102	1.152	139	3.595	60	163	36.81	2	0	1	83	0	0	3	0	2	2	1	0	7.9	1	1	1
11285	25	43	14	5	83	4.607	5.7	339	1.1	97.24	2	77	3	3	1.05	16311.7	51.75	50.3	159.1	19.87	75.7	5.2	54	1.4	224	5.79	109	1.23	148	3.83	17.4	73	23.84	2	0	1	78	0	0	1	0	1	2	3	1	27.5	3	0	1
13587	25	27	16	5.71	105	5.829	7.8	463.9	1.2	106.08	1	81	4	1	3.63	3704.02	60.75	90.4	166.2	32.73	125	6	25	0.65	184	4.76	186	2.1	122	3.15	416	153	271.9	1	0	1	83	1	0	3	1	2	2	2	1	30	3	1	0
39420	25	28	13	4.64	190	10.55	4.2	249.8	0.7	61.88	2	74	3	5	4.05	50781.4	90.7	62.2	171.9	21.05	80.6	6.4	80	2.07	221	5.72	90	1.016	123	3.181	3.5	13	26.92	2	0	1	72	1	1	1	0	1	1	1	0	27.5	3	0	1
18549	24	19	22	7.85	92	5.107	4.3	255.8	0.8	70.72	2	49	1	4	2.11	7672.67	90.27	65.5	150.8	28.8	88.8	5.3	52	1.34	163	4.22	56	0.63	100	2.59	6.7	174	3.85	1	0	1	71	0	0	2	0	1	1	1	0	5.3	1	1	1
44624	24	25	14	5	96	5.33	5.4	321.2	0.77	68.07	1	52	3	2	0.93	25211.3	107.72	64.1	177.4	20.37	90.4	5.2	43	1.11	253	6.54	165	1.863	177	4.577	3.3	60	5.5	2	1	1	89	1	0	1	1	1	1	1	0	30	3	0	1
56176	24	26	8	2.86	95	5.27	7.5	446.1	0.93	82.21	1	61	4	4	0.11	10423.4	93.42	67.3	173.2	22.43	85.7	5.6	94	2.43	249	6.44	59	0.666	143	3.698	10.5	71	14.79	2	0	1	87	0	0	1	0	1	1	1	0	18.4	2	0	1
52137	23	24	11	3.93	87	4.83	6.5	386.6	0.68	60.11	2	55	3	3	2.75	105176	102.79	79.5	162.4	30.14	103	5.9	42	1.09	282	7.29	255	2.879	189	4.888	5.1	96	5.31	2	0	1	95	1	0	3	1	1	1	1	0	30	3	1	0
55759	23	24	16	5.71	249	13.82	4.8	285.5	0.7	61.88	2	80	1	1	0.09	15042.2	87.38	68.4	146.6	31.83	94.6	7.9	40	1.03	162	4.19	144	1.626	93	2.405	236	42	561.9	1	0	1	55	0	1	3	1	3	3	2	1	30	3	1	0
61098	23	23	14	5	109	6.05	6	356.9	0.95	83.98	1	56	3	5	0.82	20917.1	93.94	115.3	173.7	38.21	123	5.3	38	0.98	243	6.28	134	1.513	178	4.603	20.4	180	11.33	2	1	1	84	1	0	3	0	1	1	1	0	30	3	1	0
29156	22	22	13	4.64	99	5.5	6.5	386.6	1.2	106.08	1	60	3	5	5	50864.4	69.23	108	183.5	32.07	114.3	5.1	45	1.16	264	6.83	214	2.416	176	4.551	3.8	114	3.33	2	0	1	91	1	0	3	1	1	1	2	0	29.4	3	1	1
6534	22	28	10	3.6	115	6.384	5.3	315.2	0.4	35.4	1	68	1	2	1.8	1246.19	118.84	75.2	160	29.38	98.8	5.2	34	0.87	164	4.24	355	4.01	59	1.53	59.8	74	80.81	2	1	1	88	1	0	2	1	2	2	1	0	30	3	0	0
20709	21	25	11	3.93	115	6.384	5.7	339	0.9	79.56	2	73	3	4	1.13	22284.1	67.5	85.8	155.6	35.44	112	5.3	60	1.55	206	5.33	101	1.14	126	3.26	19.8	226	8.76	1	1	1	91	1	0	3	0	1	1	2	0	15.9	2	1	1
37522	21	26	11	3.93	88	4.88	6.4	380.7	0.9	79.56	2	66	3	3	2.23	66182.6	70.51	74.7	167.6	26.59	93.4	5.1	69	1.78	250	6.47	165	1.863	148	3.827	7.3	134	5.45	2	0	1	83	0	0	2	1	1	1	2	0	18.51	2	1	1
37604	21	24	12	4.28	97	5.38	6.4	380.7	0.9	79.56	2	73	3	1	1.44	56799.7	67.5	111.5	157.1	45.18	122.3	5.3	52	1.34	236	6.1	198	2.235	144	3.724	11.3	188	6.01	1	0	1	62	1	0	3	1	1	1	2	0	21.5	3	1	1
47721	21	18	11	3.93	103	5.72	6.2	368.8	0.79	69.84	1	61	4	5	3.46	7750.96	101.07	102.7	176.5	32.97	113.5	5.9	86	2.22	143	3.7	49	0.553	47	1.215	9.5	96	9.9	2	0	1	75	1	0	3	0	1	1	1	0	29.4	3	1	1
52153	20	16	6	2.14	100	5.55	4.1	243.9	0.93	82.21	2	38	4	2	0.91	20884	80.68	81.7	158.3	32.6	90	5.2	58	1.5	259	6.7	161	1.818	169	4.37	5.5	115	4.78	2	0	1	91	1	0	3	1	1	1	2	0	7.3	1	1	1
62708	20	18	12	4.28	100	5.55	5.8	345	0.65	57.46	1	52	5	3	1.34	13567.9	113.38	60	165.4	21.9	81.4	5.7	47	1.22	200	5.17	112	1.264	131	3.388	13.8	123	11.22	1	0	1	82	1	0	1	0	1	1	1	0	21.6	3	0	1
62892	20	22	6	2.14	101	5.61	4.7	279.6	1.34	118.46	1	50	4	4	0.79	18225.5	64.54	86.9	174.7	28.5	92.9	6.3	53	1.37	171	4.42	81	0.914	102	2.638	5.8	94	6.17	1	1	1	83	1	0	2	0	1	1	2	0	25.3	3	0	1
16193	19	22	14	5	98	5.44	6.3	374.7	0.9	79.56	1	71	2	1	1.45	10132	91.31	76.7	169.1	26.82	104.6	6.1	37	0.96	174	4.5	122	1.38	113	2.92	3.7	118	3.14	1	0	1	65	1	0	2	0	1	1	1	0	30	3	1	0
43386	19	28	14	5	93	5.16	5.7	339	1.29	114.04	1	80	4	5	1.66	10832.4	56.05	63.3	175.7	20.51	82.9	5.7	99	2.56	207	5.35	47	0.531	99	2.56	8.3	195	4.26	2	1	1	67	1	0	1	0	1	2	3	1	30	3	0	1
46975	19	26	18	6.43	97	5.38	8.6	511.5	1.32	116.69	1	68	2	1	0.64	9047.81	58.75	66.5	163	25.03	100	5.3	83	2.15	288	7.45	94	1.061	186	4.81	31.3	285	10.98	2	0	1	63	1	0	2	0	1	2	3	1	30	3	0	1
58639	19	26	13	4.64	111	6.16	4.9	291.5	0.83	73.37	2	60	2	2	1.61	5223.09	80.66	91.9	155	38.25	115.2	6.3	42	1.09	197	5.09	263	2.969	102	2.638	15.3	47	32.55	1	1	1	79	1	1	3	1	2	2	2	1	18.51	2	1	0
48194	18	23	8	2.86	96	5.33	3.7	220.1	0.72	63.65	2	64	3	3	1.02	21236.8	93.31	54.6	155.1	22.7	86.9	5.1	76	1.97	259	6.7	128	1.445	157	4.06	5.7	82	6.95	1	0	1	75	1	0	1	0	1	1	1	0	15.9	2	0	1
5968	18	20	24	8.6	439	24.369	7.7	458	1.1	97.2	1	68	4	1	1.8	5730.84	73.12	86.5	166.6	31.16	108.2	11.3	33	0.85	209	5.4	140	1.58	115	2.97	174.1	69	252.32	2	0	1	77	0	1	3	1	2	2	2	1	30	3	1	0
62900	18	24	13	4.64	109	6.05	5.4	321.2	1	88.4	2	68	4	3	2.69	8308.63	61.36	82.2	162.1	31.3	94.2	5.6	56	1.45	216	5.59	181	2.043	124	3.207	1	15	6.67	1	0	1	84	1	0	3	1	1	1	2	0	18.51	2	1	1
4199	17	17	14	5	104	5.773	8.6	511.5	0.8	70.7	1	61	4	2	3.53	4779.77	100.69	129	180.3	39.68	135.5	5.8	43	1.11	270	6.98	183	2.07	115	2.97	102.6	126	81.43	2	0	1	101	1	0	3	1	2	2	1	1	30	3	1	1
48193	17	20	16	5.71	101	5.61	7.2	428.3	0.92	81.33	1	80	3	3	4.02	23034.1	84.09	86.7	173.8	28.7	108.2	5.8	40	1.03	187	4.84	192	2.168	109	2.819	15.5	173	8.96	1	0	1	59	1	0	2	1	1	1	2	0	30	3	1	1
49770	17	26	9	3.21	106	5.88	4.8	285.5	0.62	54.81	2	76	1	1	0.7	9121.61	92.23	47	154.9	19.59	76	5.4	54	1.4	248	6.41	287	3.24	137	3.543	4.3	14	30.71	1	0	1	70	1	0	1	1	2	2	1	0	21.5	3	0	1
1273	16	25	11	3.9	95	5.273	4.6	273.6	0.6	53	2	73	1	1	0.87	1541.12	94.72	82.8	156.4	33.85	109.2	5	49	1.26	192	4.97	239	2.7	96	2.48	2.6	57	4.56	1	0	1	69	0	0	3	1	1	1	1	0	24.8	3	1	0
15156	16	25	16	5.71	84	4.663	6.4	380.7	1	88.4	2	83	3	1	1.48	9170.71	55.9	72.2	159.5	28.38	104.7	4.8	52	1.34	178	4.6	74	0.84	111	2.87	3.7	36	10.28	1	1	1	72	0	0	2	0	1	2	3	1	21.5	3	1	1
25149	16	20	5	1.79	85	4.72	4.8	285.5	0.9	79.56	2	42	4	3	1.86	29112.5	81.86	102.1	166.8	36.7	113	5.5	47	1.22	185	4.78	52	0.587	128	3.31	24.6	209	11.77	1	0	1	77	0	0	3	0	1	1	2	0	5.3	1	1	0
27181	16	21	11	3.93	93	5.16	3.8	226	0.7	61.88	2	50	3	5	5	78229.9	105.3	48.4	160.3	18.84	71.2	5.4	34	0.88	169	4.37	154	1.739	104	2.689	4.8	34	14.12	2	0	1	77	0	0	1	1	1	1	1	0	11.7	2	0	0
59249	16	25	9	3.21	102	5.66	5.6	333.1	0.81	71.6	1	71	4	2	3.26	9747.92	94.26	74.2	169.7	25.77	95	5.8	43	1.11	175	4.53	45	0.508	123	3.181	16.7	89	18.76	1	1	1	77	1	0	2	0	1	1	1	0	30	3	0	1
14255	15	17	16	5.71	90	4.996	5.2	309.3	1	88.4	1	80	1	1	1.64	2493.97	76.08	70.3	168.5	24.76	96.6	5.5	48	1.24	158	4.09	63	0.71	97	2.51	57.6	158	36.46	2	0	1	85	0	0	1	0	2	2	2	1	30	3	0	1
40700	15	22	6	2.14	95	5.27	4.4	261.7	0.7	61.88	2	51	4	1	1.48	33056	104.64	121.8	162.9	45.9	141.4	5.7	66	1.71	271	7.01	150	1.694	175	4.526	69.1	90	76.78	2	1	1	83	1	0	3	1	2	2	1	0	7.3	1	1	1
55671	15	24	9	3.21	138	7.66	3.4	202.2	0.43	38.01	2	62	1	2	1.28	5003.53	109.9	65.7	148.7	29.71	97.3	5.9	70	1.81	231	5.97	166	1.874	128	3.31	3.9	65	6	2	0	1	61	1	0	2	1	1	1	1	0	15.9	2	1	1
7758	12	22	18	6.4	104	5.773	5.3	315.2	0.8	70.7	2	85	3	5	3.83	9718.1	72.16	56	147.2	25.84	96.2	6.2	56	1.44	215	5.56	86	0.97	142	3.67	11.6	101	11.49	1	0	1	67	1	0	2	0	1	1	2	0	18.51	2	1	1
52008	10	16	8	2.86	95	5.27	4.9	291.5	1.04	91.94	2	62	4	4	1.64	14925.8	60.77	75.2	165.1	27.59	96.1	6	80	2.07	189	4.89	59	0.666	97	2.508	7.2	235	3.06	2	0	1	92	1	0	2	0	1	1	2	0	13.7	2	1	1
9599	68	42	14	5	96	5.329	8.3	493.7	0.7	61.9	1	66	1	1	1.48	1082.63	101.62	95.9	163.9	35.7	123.1	5.8	42	1.08	275	7.11	424	4.79	115	2.97	8.9	145	6.14	2	0	1	99	1	0	3	1	1	1	1	0	30	3	1	1
6720	41	22	18	6.4	89	4.94	7.5	446.1	1	88.4	1	54	3	3	4.44	35022.3	89.44	78.7	180.4	24.18	95.9	5.7	47	1.22	239	6.18	109	1.23	170	4.4	4.9	104	4.71	2	0	1	89	1	0	1	0	1	1	2	0	25.3	3	0	1
25246	40	29	9	3.21	90	5	5.7	339	0.9	79.56	2	55	3	4	4.59	80734.2	75.5	77.9	162	29.68	96.2	5.4	64	1.66	228	5.9	162	1.829	132	3.414	1.5	18	8.33	2	0	1	81	0	0	2	1	1	1	2	0	11.7	2	1	1
12146	39	29	11	3.93	137	7.605	4.3	255.8	1.2	106.08	1	60	4	5	5	6123.09	69.23	85.8	172.9	28.7	95.5	6.5	56	1.45	222	5.74	137	1.55	139	3.59	23.7	321	7.38	2	0	1	69	0	1	2	1	1	1	2	0	30	3	0	1
60364	35	38	18	6.43	137	7.6	6.2	368.8	1.13	99.89	1	67	4	2	4.08	8412.93	71.24	102	175.5	33.12	112.4	6	56	1.45	166	4.29	72	0.813	96	2.483	12.7	179	7.09	1	1	1	86	1	1	3	0	1	1	2	0	25.3	3	1	1
18811	33	35	34	12.14	109	6.051	7.5	446.1	1.5	132.6	2	82	3	1	1.51	7277.19	34.58	75.7	159.8	29.64	102.9	5.8	75	1.94	196	5.07	85	0.96	104	2.69	14.6	102	14.31	2	0	1	73	1	1	2	0	1	3	4	1	18.51	2	1	1
1268	30	25	18	6.4	88	4.885	5.1	303.3	0.5	44.2	2	67	1	1	0.69	1266.59	102.73	57.14	149.9	25.43	87.8	5.9	82	2.13	238	6.15	106	1.2	135	3.49	4.4	47	9.36	2	0	1	51	1	0	2	0	1	1	1	0	11.7	2	0	1
30354	30	29	7	2.5	96	5.33	6.5	386.6	0.8	70.72	1	71	4	4	1.98	10584.6	94.62	72.3	160.7	28	100	5.5	38	0.98	188	4.86	84	0.948	133	3.439	13	119	10.92	2	0	1	94	0	0	2	0	1	1	1	0	30	3	0	0
46126	26	25	16	5.71	85	4.72	3.4	202.2	0.72	63.65	2	65	3	2	1.13	22473.4	92.73	60.7	150.5	26.8	87.1	5.3	84	2.17	233	6.03	66	0.745	136	3.517	3.6	14	25.71	1	0	1	84	0	0	2	0	1	1	1	0	18.51	2	0	1
56500	25	32	43	15.35	139	7.72	7.9	469.9	1.74	153.82	1	80	3	1	0.89	11998.4	39.14	84.4	167.4	30.12	104.2	7.1	47	1.22	167	4.32	108	1.219	98	2.534	121.9	135	90.3	2	1	1	81	0	1	3	0	2	4	4	1	30	3	1	1
5654	25	20	15	5.4	214	11.879	6.2	368.8	0.8	70.7	2	82	3	2	1.42	9489.63	73.52	66.34	155	27.61	106	8	69	1.78	243	6.28	242	2.73	115	2.97	12	80	15	2	0	1	70	0	1	2	1	1	1	2	0	30	3	1	1
5235	24	25	13	4.6	112	6.217	4.4	261.7	0.6	53	2	70	4	4	2.51	6503.33	96.5	108.7	168	38.51	122	5.2	38	0.98	125	3.23	88	0.99	70	1.81	6.2	184	3.37	2	0	1	59	1	0	3	0	1	1	1	0	21.5	3	1	0
43025	23	28	12	4.28	106	5.88	5.7	339	0.92	81.33	2	80	3	4	0.88	28968.6	62.94	62.6	157.9	25.11	93.5	5.9	63	1.63	220	5.69	94	1.061	138	3.569	22.3	59	37.8	2	0	1	82	1	0	2	0	2	2	2	1	30	3	1	1
55891	23	26	15	5.36	95	5.27	3.8	226	1.18	104.31	1	61	4	3	1.03	9217.77	70.2	69.3	170.9	23.73	84.5	5.6	59	1.53	269	6.96	131	1.479	184	4.758	3.7	96	3.85	1	0	1	76	1	0	1	0	1	1	2	0	29.4	3	0	1
63064	23	30	7	2.5	99	5.5	7.1	422.3	0.77	68.07	1	61	4	1	1.07	6910.12	101.86	63	183.4	18.7	87.2	5.6	150	3.88	219	5.66	74	0.835	54	1.396	23.1	62	37.26	2	0	1	83	1	0	1	0	2	2	1	0	30	3	0	1
45051	22	23	8	2.86	95	5.27	7	416.4	0.77	68.07	1	57	4	4	0.68	21115.1	104.42	96.2	170.2	33.21	114.8	5.9	71	1.84	191	4.94	81	0.914	104	2.689	10.7	208	5.14	1	0	1	75	1	0	3	0	1	1	1	0	11.2	2	1	1
56066	21	23	12	4.28	99	5.5	5.4	321.2	1.03	91.05	1	60	4	2	1.69	9771.24	83.16	70.8	174.7	23.2	95.4	5.4	40	1.03	180	4.65	124	1.4	115	2.974	3.5	50	7	1	0	1	85	1	0	1	0	1	1	2	0	21.6	3	0	1
7782	20	21	14	5	108	5.995	5.7	339	0.7	61.9	1	75	3	5	2.13	17539.7	96.09	76.54	170.6	26.3	105.1	5.9	34	0.87	153	3.96	139	1.57	91	2.35	45.2	91	49.67	1	0	1	73	1	0	2	1	2	2	1	0	30	3	1	0
1489	19	26	32	11.4	90	4.996	6.7	398.5	1.1	97.2	2	83	4	3	2.06	10030.8	49.86	59.1	153.4	25.12	84.7	5.3	95	2.45	213	5.51	95	1.07	99	2.56	18.4	47	39.15	1	0	1	67	0	0	2	0	2	3	3	1	21.5	3	0	1
15272	19	19	12	4.28	88	4.885	3.8	226	0.5	44.2	2	70	1	2	0.83	2040.05	100.84	66.4	145.8	31.24	95.4	5.4	67	1.73	149	3.85	93	1.05	63	1.63	4.3	13	33.08	1	0	1	87	0	0	3	0	2	2	1	0	21.5	3	1	1
59675	19	31	11	3.93	90	5	4	237.9	0.78	68.95	2	80	3	4	4.12	32706.9	76.73	52.2	155.8	21.5	82.3	5.6	79	2.04	211	5.46	83	0.937	115	2.974	41.5	140	29.64	2	0	1	59	0	0	1	0	1	1	2	0	15.9	2	0	1
64928	19	29	18	6.43	79	4.39	4.2	249.8	1.07	94.59	1	80	4	1	1.3	14073.6	70.15	63.4	172.6	21.3	79.5	5.7	74	1.91	266	6.88	48	0.542	182	4.707	28.6	181	15.8	2	1	1	55	1	0	1	0	1	1	2	0	30	3	0	1
35434	18	19	14	5	133	7.38	5.9	350.9	0.9	79.56	1	71	4	2	2.04	8314.19	91.31	97.8	176.7	31.32	118.2	7.6	63	1.63	160	4.14	72	0.813	83	2.146	11.7	122	9.59	1	0	1	69	0	1	3	0	1	1	1	0	30	3	1	1
35722	18	21	4	1.43	104	5.77	3.8	226	0.7	61.88	2	40	3	3	0	110383	112.05	70.3	165.7	25.6	101	5.8	25	0.65	193	4.99	282	3.184	112	2.896	12.3	161	7.64	2	0	1	76	1	0	2	1	1	1	1	0	15.9	2	1	0
57063	18	29	16	5.71	81	4.5	6.4	380.7	1.25	110.5	2	78	4	2	2.16	18562.4	44.12	78.2	161	30.17	100.8	6.1	79	2.04	209	5.4	118	1.332	106	2.741	14.6	204	7.16	1	0	1	71	1	0	3	0	1	3	4	1	21.5	3	1	1
21419	17	19	7	2.5	88	4.88	4.3	255.8	0.7	61.88	2	58	1	2	2.48	20807	100.19	67	154.2	28.18	90.6	5.2	82	2.12	219	5.66	132	1.49	111	2.87	5.5	101	5.45	1	0	1	72	0	0	2	0	1	1	1	0	11.7	2	1	1
43526	17	23	11	3.93	92	5.11	2.5	148.7	0.82	72.49	1	72	2	2	2.05	8470.39	93.33	67.7	177.1	21.58	87.5	4.8	65	1.68	164	4.24	72	0.813	85	2.198	21.9	80	27.38	2	0	1	73	1	0	1	0	1	1	1	0	21.6	3	0	1
40452	16	17	17	6.07	114	6.33	6.8	404.5	1.2	106.08	1	40	4	2	3.42	23284.1	78.4	65.3	178.8	20.43	81	5.8	67	1.73	179	4.63	59	0.666	100	2.586	61.8	119	51.93	2	0	1	89	1	0	1	0	2	2	2	1	4.7	1	0	1
60667	16	26	15	5.36	109	6.05	4.2	249.8	0.52	45.97	2	71	2	1	1.24	9732.25	99.27	58.2	145.9	27.34	89.8	7.2	63	1.63	155	4.01	123	1.389	67	1.733	6.6	23	28.7	2	0	1	59	1	1	2	0	1	1	1	0	13.7	2	1	1
963	15	18	25	8.9	104	5.773	5	297.4	1.3	114.9	1	80	1	2	1.95	1082.63	55.53	67.3	169.9	23.31	88	6	38	0.99	205	5.3	213	2.4	115	2.97	4460	207	2154.59	1	1	1	20	1	1	1	1	3	4	3	1	30	3	0	0
31294	14	21	14	5	87	4.83	4.6	273.6	0.7	61.88	2	73	3	4	3.12	48241.3	91.26	53.5	143.6	25.94	92.5	5.3	69	1.78	266	6.88	147	1.66	168	4.344	16.7	89	18.76	1	0	1	83	0	0	2	1	1	1	1	0	15.9	2	1	1
40518	14	19	9	3.21	93	5.16	6.2	368.8	0.9	79.56	2	62	3	3	3.74	53648.1	72.28	126.6	162.6	47.88	129.6	5.6	79	2.04	252	6.52	125	1.411	148	3.827	2	39	5.13	1	1	1	92	0	0	3	0	1	1	2	0	11.7	2	1	1
52369	14	19	16	5.71	179	9.94	5.9	350.9	0.76	67.18	2	69	3	1	1.11	65849.7	84.77	77.1	163.6	28.81	104.7	7.9	43	1.11	220	5.69	156	1.761	146	3.776	7.2	104	6.92	1	0	1	61	0	1	2	1	1	1	2	0	30	3	1	0
44614	13	17	15	5.36	72	4	6.6	392.6	0.92	81.33	2	62	4	2	0.88	10426.7	70.4	83.7	179.4	26.01	101.6	5.8	114	2.95	255	6.59	51	0.576	131	3.388	13	58	22.41	1	0	1	92	1	0	2	0	1	1	2	0	18.51	2	1	1
13478	11	20	9	3.21	238	13.211	4.9	291.5	1.1	97.24	1	66	4	3	1.3	6123.09	74.04	76.8	168.8	26.95	99.5	11.9	34	0.88	245	6.34	261	2.95	159	4.11	86.4	176	49.09	1	0	1	75	0	1	2	1	2	2	2	1	30	3	0	0
53381	11	21	6	2.14	89	4.94	6.2	368.8	0.8	70.72	1	59	3	5	1.38	20690.4	101.95	67	169.5	23.32	91.4	5.1	50	1.29	234	6.05	86	0.971	167	4.319	1.6	33	4.85	1	0	1	95	0	0	1	0	1	1	1	0	18.4	2	0	1
52183	99	41	11	3.93	165	9.16	5.2	309.3	0.73	64.53	1	28	1	3	2.46	25468.4	127.09	129.1	174.5	42.4	131.5	6.9	18	0.47	214	5.53	712	8.038	115	2.97	38.6	131	29.47	2	0	1	87	0	1	3	1	1	1	1	0	4.7	1	1	0
31721	42	43	8	2.86	97	5.38	7.5	446.1	1	88.4	1	62	4	4	3.37	9714.12	85.1	97	172.8	32.49	104.5	5.6	47	1.22	220	5.69	79	0.892	157	4.06	28	219	12.79	1	0	1	88	0	0	3	0	1	1	2	0	29.4	3	1	1
28836	38	27	19	6.78	81	4.5	3.4	202.2	0.8	70.72	2	60	4	5	3.3	14117.8	84.3	86.3	184.4	25.38	99.6	5.5	62	1.6	266	6.88	72	0.813	190	4.913	12.3	141	8.72	2	0	1	89	0	0	2	0	1	1	2	0	21.5	3	1	1
65446	38	39	14	5	133	7.38	6.9	410.4	1.33	117.57	1	65	4	2	1.73	8168.47	59.32	79.3	168	28.1	100.3	6.1	46	1.19	236	6.1	207	2.337	149	3.853	2.8	42	6.67	2	0	1	97	1	1	2	1	1	2	3	1	30	3	0	1
37580	36	32	14	5	89	4.94	3.9	232	0.8	70.72	2	70	3	3	1.88	62215.2	79.22	70.4	157.7	28.31	100.5	5.5	73	1.89	279	7.21	120	1.355	182	4.707	5.7	97	5.88	1	0	1	51	0	0	2	0	1	1	2	0	24.8	3	1	1
3802	31	33	13	4.6	91	5.051	8.7	517.5	0.9	79.6	1	73	4	2	0.89	4603.52	90.18	94.7	178.5	29.72	108	5.5	52	1.34	261	6.75	101	1.14	189	4.89	3540	141	2510.64	2	0	1	87	0	0	2	0	3	3	1	0	30	3	1	1
42843	30	31	11	3.93	100	5.55	6	356.9	1.12	99.01	1	56	4	2	1.41	22331.5	77.1	86.6	173.4	28.8	100.6	6	53	1.37	185	4.78	119	1.344	108	2.793	9.6	221	4.34	2	0	1	97	1	0	2	0	1	1	2	0	25.3	3	0	1
55107	30	29	28	10	105	5.83	4.7	279.6	5.39	476.48	1	80	1	1	1.62	10360	10.08	61.2	166.4	22.1	87.9	5.3	81	2.09	217	5.61	113	1.276	113	2.922	956	86	1111.63	1	1	1	43	1	0	1	0	3	4	6	1	30	3	0	1
14645	29	25	13	4.64	98	5.44	6.7	398.5	0.7	61.88	2	54	3	4	5	35846.8	102.71	106.9	166.4	38.61	125.6	5.3	54	1.4	224	5.79	135	1.52	143	3.7	3.1	61	5.08	1	0	1	85	1	0	3	1	1	1	1	0	13.7	2	1	1
4431	29	24	17	6.1	106	5.884	4.6	273.6	0.7	61.9	1	60	1	1	1.47	1265.39	105.48	89.04	169.5	30.99	101.6	8.4	39	1	180	4.65	160	1.81	115	2.97	529.5	331	159.97	1	1	1	79	1	1	3	1	2	2	1	0	30	3	0	0
62678	29	33	13	4.64	117	6.49	5.4	321.2	0.81	71.6	1	68	2	1	1.79	9235.95	96.04	66	167	23.7	92.8	5.5	50	1.29	159	4.11	77	0.869	94	2.431	2.6	17	15.29	1	0	1	103	1	0	1	0	1	1	1	0	30	3	0	1
9339	29	17	12	4.3	354	19.651	3.5	208.2	0.6	53	2	56	3	5	4.79	37264.6	105.28	84	164	31.23	105.5	11.1	19	0.5	191	4.94	284	3.21	115	2.97	2.7	10	27	2	0	1	96	0	1	3	1	1	1	1	0	13.7	2	1	0
49258	27	35	28	10	96	5.33	4	237.9	0.82	72.49	1	80	3	5	1.61	19745.1	88.8	90.8	182.7	27.2	107.2	5.9	72	1.86	203	5.25	116	1.31	108	2.793	20.9	138	15.14	1	0	1	45	1	0	2	0	1	1	2	0	29.4	3	1	1
51423	27	31	11	3.93	107	5.94	6.3	374.7	0.9	79.56	1	50	3	5	0.71	28008	104.05	89.3	164.3	33.08	107.4	5.2	72	1.86	199	5.15	76	0.858	112	2.896	7.7	92	8.37	2	0	1	88	1	0	3	0	1	1	1	0	15.6	2	1	1
1921	26	23	17	6.1	99	5.495	6.5	386.6	0.8	70.7	1	66	3	3	4.52	29363.4	97.6	85.7	184.1	25.29	101.5	5	59	1.53	231	5.97	115	1.3	149	3.85	7	167	4.19	2	0	1	93	1	0	2	0	1	1	1	0	30	3	0	1
5924	26	27	13	4.6	90	4.996	6.8	404.5	0.5	44.2	2	82	5	1	0.54	10858.5	93.58	53.7	149.5	24.03	88.8	5.5	56	1.44	215	5.56	140	1.58	131	3.39	32	43	74.42	1	0	1	95	0	0	1	1	2	2	1	0	18.51	2	1	1
46468	24	24	15	5.36	111	6.16	5.9	350.9	0.92	81.33	2	60	4	2	2.77	10882.7	71.28	59.5	155.8	24.51	92	5.7	105	2.72	311	8.04	109	1.231	184	4.758	13.9	247	5.63	2	0	1	66	1	0	1	0	1	1	2	0	13.7	2	1	1
7337	24	27	13	4.6	112	6.217	6.4	380.7	0.8	70.7	2	80	3	5	1.56	8732.88	74.44	57.8	154.5	24.21	84.3	5.8	45	1.17	239	6.18	304	3.43	133	3.44	4.4	60	7.33	2	0	1	71	1	0	1	1	1	1	2	0	24.8	3	0	0
43592	23	20	9	3.21	103	5.72	5.8	345	0.65	57.46	2	69	3	3	1.29	69052.2	95.25	69	159.6	27.09	90.6	6.1	45	1.16	172	4.45	212	2.393	85	2.198	98	102	96.08	1	0	1	61	1	0	2	1	2	2	1	0	30	3	1	0
28828	22	28	10	3.57	101	5.61	3.4	202.2	0.8	70.72	1	75	3	4	1.74	32494.6	92.29	68.4	163.3	25.65	87	5.5	47	1.22	166	4.29	110	1.242	97	2.508	7.5	112	6.7	1	0	1	67	0	0	2	0	1	1	1	0	30	3	0	1
48715	22	26	12	4.28	112	6.22	3	178.4	0.69	61	2	73	1	1	1.73	11249.1	91.58	65.5	153.9	27.65	103.9	5.8	49	1.27	128	3.31	101	1.14	59	1.526	104	84	123.81	1	0	1	84	1	1	2	0	2	2	1	0	27.5	3	1	0
50133	22	33	28	10	98	5.44	6.5	386.6	1.22	107.85	2	76	3	2	0.95	22871.8	45.99	67.7	157.6	27.26	100.5	5.4	59	1.53	202	5.22	138	1.558	115	2.974	7.7	43	17.91	1	0	1	66	1	0	2	1	1	2	3	1	24.8	3	1	1
65289	22	22	14	5	125	6.94	5.5	327.1	0.81	71.6	2	73	4	4	1.57	17474.8	76.6	76.5	161.7	29.3	111.6	7.4	48	1.24	214	5.53	125	1.411	141	3.646	25	217	11.52	1	0	1	61	0	1	2	0	1	1	2	0	24.8	3	1	0
57028	21	19	12	4.28	161	8.94	6.2	368.8	0.73	64.53	1	55	1	1	1.91	11334.5	107.45	101.4	170.4	34.92	115.7	8	66	1.71	170	4.4	97	1.095	85	2.198	25.3	122	20.74	2	0	1	86	0	1	3	0	1	1	1	0	11.2	2	1	1
52865	20	26	10	3.57	106	5.88	3.7	220.1	0.68	60.11	1	68	3	5	4.38	61179.5	101.25	61.9	178.2	19.49	84.7	5	86	2.22	229	5.92	97	1.095	124	3.207	7.7	44	17.5	2	0	1	77	1	0	1	0	1	1	1	0	30	3	0	1
3357	19	23	11	3.9	97	5.384	4.4	261.7	0.6	53	2	58	3	4	5	6410.01	103.98	56.9	159.1	22.48	84.4	5.3	63	1.62	181	4.68	116	1.31	95	2.46	1.9	28	6.79	2	0	1	82	0	0	1	0	1	1	1	0	7.3	1	0	1
48408	19	29	10	3.57	93	5.16	6.5	386.6	0.82	72.49	1	66	2	1	1.31	5524.58	96.88	66.4	158	26.6	94.4	5.3	59	1.53	242	6.26	165	1.863	150	3.879	7	46	15.22	2	0	1	89	1	0	2	1	1	1	1	0	30	3	0	1
23163	18	23	17	6.07	106	5.88	4.8	285.5	1	88.4	2	84	3	4	2.4	15578	55.55	58.8	151.2	25.72	91.2	5.8	47	1.22	247	6.39	94	1.061	181	4.681	108	116	93.1	1	0	1	69	1	0	2	0	2	3	3	1	24.8	3	1	0
16200	17	21	8	2.86	88	4.885	3.6	214.1	0.8	70.72	2	66	3	4	5	27818.2	81.21	59.4	173.1	19.82	74	5	92	2.38	211	5.46	79	0.89	103	2.66	1.6	25	6.4	2	0	1	77	0	0	1	0	1	1	2	0	24.8	3	0	1
17704	17	18	13	4.64	97	5.384	7.3	434.2	0.8	70.72	2	67	3	1	4.69	27747.9	80.71	78.1	166.1	28.31	109.5	5.6	37	0.96	166	4.29	217	2.45	115	2.97	3.8	85	4.47	2	0	1	77	0	0	2	1	1	1	2	0	21.5	3	1	0
18715	17	19	19	6.78	171	9.492	8	475.8	1.3	114.92	1	76	3	4	1.89	13389.2	56.93	74.5	180.1	22.97	93.3	6.9	33	0.85	184	4.76	242	2.73	103	2.66	62.2	178	34.94	1	1	1	59	0	1	1	1	2	3	3	1	30	3	0	0
19256	17	21	19	6.78	258	14.322	5	297.4	0.9	79.56	2	84	3	3	4.05	7244.08	63.04	79.8	146.9	36.98	116.1	7	42	1.09	266	6.88	164	1.85	115	2.97	4.2	54	7.78	1	1	1	61	0	1	3	1	1	1	2	0	27.5	3	1	0
33069	17	26	12	4.28	89	4.94	6.9	410.4	1.1	97.24	1	80	3	1	0.83	11035.7	67.86	65.1	169.8	22.58	89.6	5.3	40	1.03	226	5.84	134	1.513	159	4.112	5.5	90	6.11	2	0	1	63	0	0	1	0	1	1	2	0	30	3	0	1
39116	17	15	17	6.07	374	20.76	4.7	279.6	1.5	132.6	1	60	4	5	5	6287.29	52.97	112.9	187.4	32.15	117.5	13.7	35	0.91	199	5.15	113	1.276	141	3.646	125.5	135	92.96	1	0	1	79	0	1	3	0	2	3	3	1	29.4	3	1	0
49084	17	25	21	7.5	96	5.33	6	356.9	1.12	99.01	1	80	3	3	5	20267.7	66.41	75.6	166.7	27.21	103.5	5.8	48	1.24	306	7.91	201	2.269	218	5.637	51.1	97	52.68	2	1	1	91	1	0	2	1	2	2	2	1	30	3	1	1
51669	17	19	14	5	107	5.94	4.4	261.7	0.63	55.69	2	65	1	1	0.54	6068.27	98.39	73.1	162	27.85	101.8	6.1	48	1.24	258	6.67	233	2.631	163	4.215	13.2	167	7.9	1	0	1	85	1	0	2	1	1	1	1	0	18.51	2	1	0
57532	17	24	12	4.28	79	4.39	7	416.4	0.75	66.3	2	71	5	1	1.35	45289.5	85.06	66.3	152.5	28.51	98.1	6.1	50	1.29	198	5.12	164	1.852	115	2.974	2.6	52	5	2	0	1	55	1	0	2	1	1	1	2	0	21.5	3	1	1
13804	16	24	15	5.36	109	6.051	4.8	285.5	0.8	70.72	1	84	3	1	2.35	11395.6	87.27	62.3	159.5	24.49	95.2	5.8	64	1.66	163	4.22	96	1.08	80	2.07	6.5	28	23.21	1	1	1	60	1	0	1	0	1	1	2	1	30	3	0	1
15678	16	21	19	6.78	101	5.607	5.7	339	1.2	106.08	1	80	3	5	4.17	9317.64	61.13	80.8	176.9	25.82	102	5.6	54	1.4	243	6.28	101	1.14	169	4.37	35.9	79	45.44	2	0	1	77	1	0	2	0	2	2	2	1	30	3	1	1
37088	16	19	13	4.64	116	6.44	6.9	410.4	1	88.4	1	66	5	1	3.74	50876.3	83.01	92.9	179.4	28.86	118.1	5.2	30	0.78	206	5.33	477	5.385	115	2.97	8.5	100	8.5	2	0	1	71	1	0	2	1	1	1	2	0	30	3	1	0
48040	16	17	14	5	147	8.16	6.8	404.5	0.74	65.42	2	62	4	3	1.73	9544.76	91.42	69.9	165.8	25.43	93.5	8.1	76	1.97	250	6.47	70	0.79	160	4.138	15.4	16	96.25	1	0	1	59	0	1	2	0	2	2	1	0	15.9	2	1	1
52296	15	31	21	7.5	91	5.05	6.2	368.8	5.82	514.49	1	73	5	1	0.43	10364.7	9.6	61.4	159.9	24.01	95.5	5	56	1.45	171	4.42	77	0.869	100	2.586	120.5	57	211.4	1	0	1	77	0	0	1	0	2	4	6	1	30	3	0	1
21586	14	20	18	6.43	188	10.44	5.6	333.1	1	88.4	2	75	4	4	2.87	18037.1	58.75	98.8	155.2	41.02	105.2	6.9	67	1.73	190	4.91	62	0.7	111	2.87	26.1	218	11.97	1	1	1	94	0	1	3	0	1	2	3	1	18.51	2	1	1
30060	14	23	16	5.71	77	4.27	4.5	267.7	0.9	79.56	2	84	3	4	3.35	18937.3	63.04	54.2	164.5	20.03	80.6	5.2	78	2.02	223	5.77	122	1.377	121	3.129	13.2	131	10.08	2	0	1	58	0	0	1	0	1	1	2	0	15.9	2	0	1
52321	14	24	25	8.93	116	6.44	5.2	309.3	0.93	82.21	2	80	3	4	5	32202.9	62.13	59.9	155	24.93	84.2	5.8	61	1.58	186	4.81	73	0.824	110	2.845	4	52	7.69	2	0	1	36	1	0	1	0	1	1	2	0	30	3	0	1
60316	14	23	24	8.57	128	7.11	6.4	380.7	1.24	109.62	1	80	2	3	2.2	10450.7	58.78	74.3	161.8	28.38	106.4	6	41	1.06	144	3.72	173	1.953	68	1.758	63.2	92	68.7	2	0	1	73	1	1	2	1	2	3	3	1	30	3	1	1
15403	12	16	19	6.78	115	6.384	5.7	339	1.4	123.76	1	64	4	3	2.78	4705.37	56.13	90.5	175.2	29.48	105.5	6.1	49	1.27	185	4.78	70	0.79	122	3.15	5.4	100	5.4	1	0	1	75	1	1	2	0	1	2	3	1	25.3	3	1	1
4390	12	25	19	6.8	86	4.774	6.7	398.5	1.1	97.2	1	85	3	2	3.11	7228.76	65.78	72.6	173.9	24.01	98.6	5.5	51	1.31	195	5.04	89	1	127	3.28	338.5	121	279.75	2	1	1	69	0	0	1	0	2	2	2	1	30	3	0	1
8028	11	22	10	3.6	84	4.663	4.8	285.5	0.6	53	2	84	1	1	0.5	1603.73	88.45	48.6	147.6	22.31	85.4	5.4	68	1.75	257	6.65	110	1.24	167	4.32	153.1	58	263.97	2	0	1	40	0	0	1	0	2	2	2	1	18.51	2	0	1
42025	10	14	9	3.21	93	5.16	3.2	190.3	0.72	63.65	2	43	4	3	1.93	26467.5	106.33	76	159.3	29.95	96.4	5.7	69	1.78	194	5.02	60	0.677	113	2.922	10.2	144	7.08	2	0	1	69	1	0	2	0	1	1	1	0	6.3	1	1	1
64	9	14	13	4.6	75	4.163	4.5	267.7	0.4	35.4	2	63	4	4	5	7718.17	111.14	54.2	162.7	20.48	73.9	4.8	41	1.07	195	5.04	155	1.75	123	3.18	40.7	117	34.79	2	0	1	75	0	0	1	1	2	2	1	0	21.5	3	0	0
8852	44	31	19	6.8	134	7.438	8	475.8	1	88.4	1	67	1	2	1.64	1269.77	82.49	104.3	164.6	38.5	124.1	6.4	36	0.94	190	4.91	182	2.05	117	3.03	25.3	118	21.44	2	0	1	93	1	1	3	1	1	1	2	0	30	3	1	0
37154	39	41	17	6.07	91	5.05	5.5	327.1	0.7	61.88	2	83	3	3	1.82	29658.8	85.76	69.5	154.1	29.27	101	5.1	31	0.8	143	3.7	232	2.619	66	1.707	6	33	18.18	1	1	1	47	0	1	2	1	1	1	2	0	21.5	3	1	0
8532	37	31	30	10.7	224	12.434	4.6	273.6	1.2	106.1	2	73	3	3	5	24860.7	47.8	62.8	150.8	27.62	89	6.3	48	1.23	189	4.89	156	1.76	115	2.97	21.2	164	12.93	1	1	1	65	1	1	2	1	1	2	3	1	15.9	2	1	0
20166	33	28	23	8.21	116	6.439	5.1	303.3	0.9	79.56	1	69	3	1	0.92	10725.7	92.45	88.2	175	28.8	111.2	6.5	36	0.93	319	8.25	559	6.31	115	2.97	39.6	149	26.58	1	0	1	93	1	1	2	1	1	1	1	0	30	3	1	0
51108	27	25	11	3.93	88	4.88	5.8	345	0.95	83.98	1	39	3	3	0.96	21448.1	104.42	137	183.5	40.69	137.4	5.3	51	1.32	183	4.73	141	1.592	104	2.689	24.2	100	24.2	2	0	1	101	1	0	3	1	1	1	1	0	9.4	1	1	1
2721	26	31	21	7.5	100	5.551	6.6	392.6	0.8	70.7	2	77	3	3	1.68	22110.8	75.84	90.2	160.4	35.06	111.9	6.1	58	1.5	215	5.56	168	1.9	123	3.18	0.8	14	5.71	2	0	1	73	1	0	3	1	1	1	2	0	30	3	1	1
46969	25	26	26	9.28	232	12.88	11.7	695.9	1.12	99.01	1	45	5	4	1.49	116710	82.56	104.2	167.6	37.1	115.5	7.7	42	1.09	257	6.65	600	6.774	115	2.97	2220	86	2581.4	1	0	1	108	0	1	3	1	3	3	2	1	21.6	3	1	1
37702	22	30	10	3.57	90	5	4.7	279.6	1	88.4	1	71	3	3	2.03	41946.5	80.47	77.8	177.3	24.75	96.1	5.6	46	1.19	226	5.84	132	1.49	154	3.982	4.2	75	5.6	2	0	1	91	0	0	1	0	1	1	2	0	30	3	0	1
12503	20	29	23	8.21	97	5.384	6.5	386.6	0.9	79.56	1	85	3	4	1.38	5935.5	83.7	66.6	167	23.88	101.5	5.4	44	1.14	198	5.12	85	0.96	137	3.54	51	140	36.43	1	0	1	80	0	0	1	0	2	2	2	1	30	3	0	1
13856	19	25	23	8.21	93	5.162	6.1	362.8	1	88.4	1	66	3	4	3.06	19805.4	83.01	80.6	167.7	28.66	110.8	5.7	46	1.19	247	6.39	132	1.49	175	4.53	40.5	103	39.32	2	0	1	71	1	0	2	0	2	2	2	1	30	3	1	1
7554	19	17	17	6.1	92	5.107	6.1	362.8	0.7	61.9	1	63	1	1	1.34	1383.02	103.53	85.4	172.8	28.6	107.1	5.3	36	0.94	203	5.25	135	1.52	140	3.62	3.1	30	10.33	2	0	1	81	0	0	2	1	1	1	1	0	30	3	1	0
50100	18	20	16	5.71	92	5.11	2.8	166.5	0.84	74.26	2	80	3	3	5	41815.9	70.21	53.4	161.1	20.58	83.2	5.3	58	1.5	163	4.22	76	0.858	90	2.327	34.3	151	22.72	1	1	1	67	0	0	1	0	1	1	2	0	21.5	3	0	1
9130	18	24	10	3.6	109	6.051	8.9	529.4	0.7	61.9	2	37	4	3	0.62	15544.2	114.16	131.4	167.8	46.67	133.5	5.8	63	1.63	223	5.77	90	1.02	142	3.67	161.7	324	49.91	2	0	1	101	1	0	3	0	2	2	1	0	4.5	1	1	1
19116	17	22	20	7.14	95	5.273	5.6	333.1	1.3	114.92	1	76	3	5	5	18124.2	56.93	76.2	178.2	24	96	5.5	70	1.81	185	4.78	58	0.65	103	2.66	6.5	150	4.33	2	0	1	85	0	0	1	0	1	2	3	1	25.3	3	0	1
52883	17	18	10	3.57	157	8.72	3.7	220.1	1.06	93.7	1	73	4	3	1.81	10680.5	74.1	71.4	172.3	24.05	96.7	8.3	55	1.42	215	5.56	115	1.298	137	3.543	982	125	785.6	2	0	1	83	0	1	1	0	3	3	2	1	30	3	0	1
46037	16	16	19	6.78	178	9.88	3.7	220.1	0.92	81.33	1	69	2	2	0.8	12040.8	90.05	94.1	170.5	32.37	112.5	6.8	30	0.78	160	4.14	230	2.597	84	2.172	79.7	197	40.46	1	1	1	78	0	1	3	1	2	2	1	0	30	3	1	0
58413	15	19	7	2.5	99	5.5	5.2	309.3	1.02	90.17	1	74	1	5	2.27	11743.7	77.12	82.5	172.7	27.66	106.4	5.8	47	1.22	151	3.9	132	1.49	78	2.017	30	34	88.24	2	0	1	78	1	0	2	0	2	2	2	1	30	3	1	1
42449	12	20	8	2.86	93	5.16	4.9	291.5	0.92	81.33	1	80	3	1	0.69	12653.1	84.09	75.5	178.3	23.75	98.5	5.8	59	1.53	187	4.84	72	0.813	114	2.948	1.6	52	3.08	2	0	1	66	1	0	1	0	1	1	2	0	30	3	0	1
60283	12	20	12	4.28	93	5.16	5.6	333.1	0.73	64.53	2	80	3	3	1.68	33429.8	83.08	57.5	157.9	23.06	96.4	5.4	66	1.71	258	6.67	92	1.039	174	4.5	39.6	46	86.09	1	1	1	73	0	0	1	0	2	2	2	1	24.8	3	1	1
4840	10	20	13	4.6	87	4.829	5	297.4	0.8	70.7	2	81	4	1	1.46	6332.72	73.98	69.9	159.1	27.61	100.2	6.5	50	1.29	236	6.1	151	1.7	115	2.97	10.7	73	14.66	1	1	1	69	0	1	2	1	1	1	2	0	27.5	3	1	1
15300	9	18	11	3.93	100	5.551	4.7	279.6	1	88.4	2	85	3	3	1.55	9170.71	55.21	42.6	145.5	20.12	74.4	5.3	78	2.02	253	6.54	118	1.33	151	3.9	35.4	109	32.48	2	0	1	33	1	0	1	0	2	3	3	1	30	3	0	1
7695	9	17	9	3.2	92	5.107	5.6	333.1	0.5	44.2	2	80	3	5	3.64	11154.1	94.76	54.8	161.3	21.06	82.5	5.3	56	1.45	204	5.28	258	2.91	96	2.48	3.9	86	4.53	1	1	1	63	0	0	1	1	1	1	1	0	30	3	0	1
27217	145	44	11	3.93	100	5.55	4.5	267.7	0.7	61.88	1	51	3	4	4.35	89060.5	111.56	80.2	171.8	27.17	103.3	5.5	36	0.93	200	5.17	301	3.398	104	2.689	11.9	157	7.58	2	1	1	92	1	0	2	1	1	1	1	0	30	3	1	0
50439	101	89	7	2.5	99	5.5	5.2	309.3	0.52	45.97	2	51	1	2	1.04	14515.1	112.42	87.1	148.4	39.55	117.2	4.9	37	0.96	190	4.91	109	1.231	131	3.388	26	99	26.26	2	0	1	55	1	0	3	0	1	1	1	0	10	2	1	0
57667	101	43	10	3.57	99	5.5	4.9	291.5	0.86	76.02	2	53	5	3	0.82	22676.7	80.73	66.5	150.9	29.2	99.5	5.8	51	1.32	245	6.34	202	2.281	154	3.982	3.9	70	5.57	2	0	1	97	1	0	2	1	1	1	2	0	13.7	2	1	1
40331	54	50	7	2.5	88	4.88	6.3	374.7	0.8	70.72	1	38	3	2	3.57	87099.3	116.17	72.3	178.7	22.64	90	5.1	73	1.89	206	5.33	174	1.964	98	2.534	3.6	45	8	2	0	1	87	0	0	1	1	1	1	1	0	6.7	1	0	1
7801	48	35	15	5.4	91	5.051	7.6	452	0.8	70.7	1	46	3	5	5	44960.3	110.53	140.6	190.5	38.74	127.4	4.9	37	0.96	181	4.68	116	1.31	121	3.13	8.2	155	5.29	2	0	1	102	0	0	3	0	1	1	1	0	29.4	3	1	0
50679	46	42	10	3.57	109	6.05	4.7	279.6	0.62	54.81	2	74	3	3	1.18	33715.3	93.39	84.7	161.8	32.35	112.8	6.5	60	1.55	156	4.03	53	0.598	85	2.198	40.9	175	23.37	1	1	1	31	1	1	3	0	1	1	1	0	15.9	2	1	1
18144	45	38	19	6.78	136	7.549	5.3	315.2	1	88.4	1	69	3	4	5	20784.9	81.47	94.2	177.7	29.83	104.3	6.4	30	0.78	159	4.11	337	3.8	62	1.6	31	147	21.09	2	1	1	85	1	1	2	1	1	1	2	0	30	3	1	0
27888	42	27	11	3.93	106	5.88	7.1	422.3	1.2	106.08	1	69	1	3	2.95	3300.11	65.46	71.8	166.1	26.02	98.6	6.2	39	1.01	194	5.02	146	1.648	126	3.258	2.4	84	2.86	2	0	1	67	1	0	2	1	1	1	2	0	30	3	0	0
12326	35	26	13	4.64	90	4.996	6.2	368.8	0.8	70.72	1	70	3	3	4.82	15039.1	95.21	109.5	170.9	37.49	120.4	5.7	43	1.11	245	6.34	301	3.4	142	3.67	16.3	104	15.67	2	0	1	71	1	0	3	1	1	1	1	0	30	3	1	1
18799	30	35	24	8.57	95	5.273	5.8	345	1	88.4	2	84	3	3	1.35	11599.5	55.55	57.1	161.9	21.78	87.7	4.8	62	1.6	170	4.4	110	1.24	86	2.22	18.3	105	17.43	2	1	1	56	0	0	1	0	1	2	3	1	21.5	3	0	1
46756	30	33	6	2.14	114	6.33	7.5	446.1	0.69	61	2	77	3	3	0.77	36091.2	89.33	73.9	161.2	28.44	110.4	6.3	48	1.24	285	7.37	228	2.574	191	4.939	17.6	94	18.72	1	0	1	76	1	0	2	1	1	1	2	0	27.5	3	1	0
57601	29	20	18	6.43	99	5.5	5.4	321.2	1.26	111.38	1	41	4	5	5	24619	73.48	100	175.8	32.36	102.5	5.4	60	1.55	233	6.03	70	0.79	159	4.112	68.7	160	42.94	2	0	1	109	1	0	3	0	2	2	2	1	9.4	1	1	1
53009	28	36	18	6.43	113	6.27	5.9	350.9	0.81	71.6	2	73	3	3	2.64	40750.4	76.6	57.9	161.5	22.2	80.4	6.1	84	2.17	277	7.16	119	1.344	169	4.37	11.8	78	15.13	1	0	1	67	1	0	1	0	1	1	2	0	24.8	3	0	1
17833	27	43	19	6.78	83	4.607	5.5	327.1	0.7	61.88	2	68	1	1	0.49	2168.97	94.15	87.2	155.5	36.06	120.6	5.6	60	1.55	168	4.34	122	1.38	84	2.17	3.4	67	5.07	2	0	1	63	0	1	3	0	1	1	1	0	15.9	2	1	1
38065	27	29	7	2.5	116	6.44	5.3	315.2	1.6	141.44	1	66	4	2	1.2	9714.12	47.22	85.4	178.1	26.92	108.7	6.3	42	1.09	183	4.73	209	2.36	99	2.56	15.7	345	4.55	1	0	1	83	1	0	2	1	1	2	3	1	30	3	1	1
162	26	24	7	2.5	90	4.996	4.3	255.8	0.7	61.9	1	63	1	1	2.18	1383.02	103.53	75.7	172.6	25.41	104.2	5.4	54	1.39	207	5.35	140	1.58	125	3.23	5.5	67	8.21	2	0	1	75	0	0	2	1	1	1	1	0	30	3	1	1
17778	26	22	14	5	95	5.273	7.9	469.9	1	88.4	1	50	4	3	2.79	9218.7	91.69	96.2	176.7	30.81	111	5.4	44	1.14	169	4.37	63	0.71	112	2.9	21	193	10.88	2	0	1	69	0	0	3	0	1	1	1	0	25.3	3	1	1
19887	25	28	20	7.14	94	5.218	6.3	374.7	0.9	79.56	1	74	3	1	0.9	6581.54	89.62	72.3	159.6	28.38	102.1	5.6	42	1.09	286	7.4	249	2.81	194	5.02	8.7	180	4.83	1	0	1	75	0	0	2	1	1	1	2	0	30	3	1	1
55941	25	19	20	7.14	237	13.16	6.4	380.7	0.83	73.37	2	70	4	3	2.31	14819.2	75.79	70.4	158.1	28.16	104.5	8.3	96	2.48	259	6.7	234	2.642	116	3	20.5	155	13.23	2	0	1	73	0	1	2	1	1	1	2	0	30	3	1	1
38452	24	22	5	1.79	95	5.27	4.5	267.7	0.7	61.88	2	47	4	2	1.94	25327.1	107.28	89.2	159.9	34.89	109.3	5.5	69	1.78	186	4.81	67	0.756	104	2.689	3.7	81	4.57	1	0	1	93	1	0	3	0	1	1	1	1	10	2	1	1
63532	24	18	12	4.28	246	13.66	3.9	232	0.84	74.26	1	54	4	3	2.18	19752.5	103.63	108.2	178.6	33.9	117.7	9.8	37	0.96	123	3.18	91	1.027	68	1.758	23.2	40	58	1	0	1	94	0	1	3	0	2	2	1	0	29.4	3	1	0
6379	24	25	11	3.9	127	7.05	4.7	279.6	0.5	44.2	2	71	1	1	1.04	1718.93	100.21	79.3	147.4	36.5	114.4	6.4	36	0.93	185	4.78	169	1.91	115	2.97	8.7	123	7.07	1	0	1	72	1	0	3	1	1	1	1	0	24.8	3	1	0
23682	23	23	9	3.21	129	7.16	5.4	321.2	0.8	70.72	2	80	3	3	1.29	16214.3	74.44	70.9	154.8	29.59	109.3	5.7	53	1.37	158	4.09	172	1.942	71	1.836	23.1	107	21.59	2	0	1	70	1	1	2	1	1	1	2	0	21.5	3	1	1
63263	23	28	16	5.71	121	6.72	7.3	434.2	1.21	106.96	1	53	2	3	1.39	24211.8	71.6	85	170.7	29.2	102.9	6.4	40	1.03	247	6.39	142	1.603	179	4.629	6.6	158	4.18	2	0	1	85	1	1	2	1	1	1	2	0	25.3	3	1	1
44424	22	24	11	3.93	86	4.77	4	237.9	0.86	76.02	2	62	4	3	2.69	12310.3	76.34	105	167.6	37.38	105.6	6.1	99	2.56	231	5.97	87	0.982	115	2.974	3.4	49	6.94	2	0	1	75	1	0	3	0	1	1	2	0	13.7	2	1	1
54077	22	25	19	6.78	107	5.94	8	475.8	0.99	87.52	2	71	3	5	4.63	36056.5	60.96	77.3	161.5	29.64	107.9	5.7	48	1.24	189	4.89	128	1.445	115	2.974	12.5	17	73.53	2	0	1	70	1	0	2	0	2	2	2	1	21.5	3	1	0
54808	22	20	15	5.36	93	5.16	6.8	404.5	0.99	87.52	1	77	3	5	2.27	31503.2	78.46	92.6	168.3	32.69	123.5	5.1	51	1.32	176	4.55	87	0.982	108	2.793	20.9	113	18.5	1	0	1	67	0	0	3	0	1	1	2	0	29.4	3	1	1
4020	21	20	16	5.7	100	5.551	6	356.9	0.5	44.2	2	60	3	3	2.82	24493.4	107.31	127.8	160.2	49.8	140.3	5.4	58	1.5	204	5.28	227	2.56	101	2.61	16	94	17.02	1	0	1	71	0	0	3	1	1	1	1	0	18.51	2	1	1
52088	21	29	11	3.93	86	4.77	4.1	243.9	1	88.4	2	79	3	5	3.69	33552	57.31	55.4	161.3	21.29	79.2	5.4	76	1.97	183	4.73	133	1.502	80	2.069	4.4	68	6.47	2	0	1	73	0	0	1	0	1	2	3	1	21.5	3	0	1
53219	21	26	14	5	87	4.83	6.9	410.4	1.25	110.5	1	80	3	4	1.68	21378.3	58.21	71.7	172.2	24.18	99.2	6	48	1.24	230	5.95	98	1.106	162	4.189	42	164	25.61	2	0	1	53	1	1	1	0	1	2	3	1	30	3	0	1
7849	21	16	11	3.9	113	6.273	6.9	410.4	0.7	61.9	2	49	4	2	5	13885.7	105.95	112.4	163.7	41.94	120.8	6.4	65	1.67	202	5.22	62	0.7	125	3.23	18.8	81	23.21	1	0	1	96	1	0	3	0	1	1	1	0	7.3	1	1	1
9731	21	22	27	9.6	102	5.662	5.4	321.2	1.2	106.1	1	83	3	3	1.42	7264.75	60	60.24	168.7	21.17	89	5.3	43	1.11	176	4.55	82	0.93	117	3.03	8.1	145	5.59	2	0	1	67	1	0	1	0	1	1	2	0	30	3	0	1
20765	20	24	12	4.28	94	5.218	6.9	410.4	0.7	61.88	2	61	3	2	3.34	27691.3	98.33	73.9	166.1	26.79	101.8	5.9	37	0.96	215	5.56	141	1.59	150	3.88	4.4	66	6.67	1	0	1	83	1	0	2	1	1	1	1	0	30	3	1	0
47372	20	16	11	3.93	114	6.33	7.3	434.2	0.93	82.21	1	56	3	3	3.69	86921.8	96.37	88.5	179.8	27.38	105	5.6	40	1.03	211	5.46	136	1.535	144	3.724	8.3	20	41.5	2	0	1	79	1	0	2	1	2	2	1	0	30	3	1	1
51379	19	22	10	3.57	96	5.33	6.9	410.4	0.92	81.33	1	56	4	4	5	20345.9	97.63	107.9	181.4	32.79	110.5	5.6	65	1.68	224	5.79	89	1.005	141	3.646	6.2	123	5.04	2	0	1	76	0	0	3	0	1	1	1	0	30	3	1	1
65506	19	21	8	2.86	319	17.71	4.2	249.8	0.86	76.02	1	50	1	2	0.68	30839.2	105.49	71.5	160.9	27.6	92.9	10.6	35	0.91	293	7.58	979	11.053	115	2.97	245	29	844.83	2	0	1	78	0	1	2	1	3	3	1	0	21.6	3	0	0
6579	19	19	14	5	90	4.996	5.1	303.3	0.7	61.9	1	55	3	1	0.72	12226.2	108.82	125.1	166.8	44.96	151.9	5.9	37	0.95	110	2.84	64	0.72	61	1.58	43.6	137	31.82	1	0	1	70	1	0	3	0	2	2	1	0	30	3	1	0
43365	18	20	11	3.93	172	9.55	4.1	243.9	0.62	54.81	1	56	1	2	0.58	15233	112.18	62.7	166.2	22.7	92.1	5.3	31	0.8	146	3.78	204	2.303	74	1.914	399	160	249.38	1	1	1	80	0	1	1	1	2	2	1	0	30	3	0	0
46811	18	24	19	6.78	95	5.27	5.3	315.2	1.11	98.12	1	80	5	4	0.28	20220.3	67.13	48.7	167.6	17.34	75.9	5.6	56	1.45	194	5.02	65	0.734	125	3.233	3	54	5.56	1	0	1	45	0	0	1	0	1	1	2	0	30	3	0	1
13254	17	21	14	5	93	5.162	3.8	226	0.6	53.04	2	62	4	4	5	5279.27	101.42	69	154.7	28.83	93	5.4	56	1.45	206	5.33	90	1.02	132	3.41	6.3	89	7.08	1	0	1	59	0	0	2	0	1	1	1	0	11.7	2	1	1
17641	17	22	11	3.93	92	5.107	3.8	226	0.6	53.04	2	49	4	2	1.12	13656.3	109.96	110.2	153.8	46.59	122.5	6.3	73	1.89	187	4.84	64	0.72	101	2.61	18.9	92	20.54	2	0	1	83	1	0	3	0	1	1	1	0	4.5	1	1	1
29032	17	28	11	3.93	86	4.77	4.4	261.7	0.8	70.72	2	82	4	1	2.62	16202.7	73.52	55.1	154.4	23.11	84.5	5.4	99	2.56	265	6.85	113	1.276	143	3.698	3.4	78	4.36	2	0	1	59	0	0	1	0	1	1	2	0	30	3	0	1
2915	17	16	22	7.9	134	7.438	6.3	374.7	0.9	79.6	1	65	1	1	0.32	1383.02	94.78	70.8	165.4	25.88	97.5	5.9	40	1.04	192	4.97	100	1.13	132	3.41	12.1	147	8.23	1	0	1	73	1	1	2	0	1	1	1	0	25.3	3	0	1
41522	17	15	13	4.64	124	6.88	5.2	309.3	0.89	78.68	1	72	3	4	1.21	10561.9	91.05	80.4	174.9	26.28	107	5.9	46	1.19	229	5.92	198	2.235	143	3.698	32.9	141	23.33	2	0	1	19	1	1	2	1	1	1	1	0	30	3	1	1
52271	17	24	19	6.78	119	6.61	5	297.4	0.71	62.76	2	80	1	9	1.29	8895.76	85.9	51.9	148.4	23.57	91	6.3	67	1.73	189	4.89	146	1.648	93	2.405	14	59	23.73	1	0	1	49	1	1	1	1	1	1	2	0	18.51	2	1	1
30893	16	16	18	6.43	254	14.1	5.9	350.9	1.5	132.6	2	70	4	3	1.34	17060	37.26	63.9	156.2	26.19	99	10.2	81	2.09	234	6.05	84	0.948	136	3.517	1614	116	1391.38	1	0	1	79	0	1	2	0	3	4	4	1	18.51	2	1	1
49890	16	22	11	3.93	81	4.5	5	297.4	0.72	63.65	2	54	4	2	0	23741	99.3	92.6	156.8	37.66	113.5	5.5	48	1.24	179	4.63	52	0.587	121	3.129	11.1	102	10.88	1	0	1	61	0	0	3	0	1	1	1	0	7.3	1	1	0
54839	16	31	31	11.07	106	5.88	6.9	410.4	2	176.8	1	80	3	5	4.12	21378.3	33.12	62.4	166.7	22.46	90.8	6	55	1.42	204	5.28	116	1.31	126	3.258	3.7	108	3.43	2	0	1	64	1	0	1	0	1	3	4	1	30	3	0	1
56634	16	24	20	7.14	83	4.61	4	237.9	0.99	87.52	2	77	3	3	1.37	20714.8	58.73	64.5	150.6	28.44	92	5.4	67	1.73	180	4.65	72	0.813	99	2.56	20.6	83	24.82	1	0	1	51	0	0	2	0	1	2	3	1	18.51	2	1	1
62377	16	23	13	4.64	118	6.55	4.7	279.6	1.01	89.28	2	78	3	2	1.24	35965.8	56.98	64.8	162.1	24.7	85.2	6	50	1.29	199	5.15	108	1.219	127	3.284	6.4	64	10	2	1	1	67	1	0	1	0	1	2	3	1	30	3	0	1
16217	15	23	10	3.57	81	4.496	4.3	255.8	0.8	70.72	2	61	4	4	3	8046.82	83.78	73.2	163	27.55	84.2	5.2	76	1.97	226	5.84	101	1.14	130	3.36	5.7	94	6.06	2	0	1	74	0	0	2	0	1	1	2	0	10	2	0	1
35689	15	10	12	4.28	105	5.83	3.4	202.2	0.8	70.72	2	71	3	1	3.18	56799.7	78.72	71	163.7	26.49	93.5	5.6	66	1.71	268	6.93	135	1.524	175	4.526	6.1	108	5.65	2	0	1	57	1	0	2	1	1	1	2	0	15.9	2	1	1
49565	15	21	8	2.86	98	5.44	3.5	208.2	0.64	56.58	2	61	1	4	3.43	7027.28	100.48	74.8	156.8	30.42	96	5.8	58	1.5	299	7.73	214	2.416	198	5.12	40.3	90	44.78	2	0	1	85	1	0	3	1	2	2	1	0	15.9	2	1	1
11696	14	15	21	7.5	97	5.384	7.5	446.1	1.1	97.24	2	75	3	5	5	20967.6	52.4	65.4	169.5	22.76	86.3	5.3	45	1.16	136	3.52	93	1.05	72	1.86	5.5	133	4.14	2	0	1	62	1	0	1	0	1	2	3	1	24.8	3	0	0
18879	14	20	33	11.78	92	5.107	3.4	202.2	0.8	70.72	2	56	3	5	5	42835.6	86.42	50.8	156.5	20.74	75.2	5.6	78	2.02	175	4.53	72	0.81	83	2.15	13.7	276	4.96	2	0	1	99	0	0	1	0	1	1	2	0	11.7	2	0	1
26129	14	19	13	4.64	101	5.61	5.6	333.1	0.8	70.72	2	60	3	3	1.2	36137.5	84.3	61.7	158.8	24.47	85.8	5.6	69	1.78	228	5.9	93	1.05	140	3.62	6.4	111	5.77	2	0	1	85	1	0	1	0	1	1	2	0	21.5	3	0	1
60179	14	22	6	2.14	124	6.88	8.2	487.7	0.92	81.33	2	68	4	3	1.81	15331.1	67.82	108.9	168.4	38.4	115.3	6.6	54	1.4	205	5.3	124	1.4	126	3.258	4.2	62	6.77	1	1	1	89	0	1	3	0	1	1	2	0	18.51	2	1	1
41127	13	19	7	2.5	137	7.6	4.9	291.5	0.7	61.88	2	70	4	2	1.65	23948.5	92.98	81.4	160.9	31.44	102.2	7	70	1.81	224	5.79	167	1.885	121	3.129	30.8	77	40	1	1	1	79	0	1	3	1	2	2	1	0	27.5	3	1	1
61962	13	23	32	11.42	136	7.55	8.7	517.5	1.4	123.76	1	80	2	3	2.77	9268.47	50.81	81.7	173.5	27.14	96.7	5.5	65	1.68	215	5.56	108	1.219	128	3.31	1.5	32	4.69	2	0	1	24	0	1	2	0	1	2	3	1	30	3	0	1
16295	12	18	37	13.21	115	6.384	9.9	588.9	2.3	203.32	1	77	4	1	0.85	5077.43	28.53	82.8	176.3	26.64	106.3	5.5	33	0.85	268	6.93	193	2.18	196	5.07	153	216	70.83	2	0	1	25	1	0	2	1	2	4	5	1	30	3	1	0
16672	12	25	25	8.93	104	5.773	7.4	440.2	1.1	97.24	1	85	3	1	1.32	7002.65	65.78	74.6	178.4	23.44	101.6	5.7	39	1.01	196	5.07	197	2.22	118	3.05	81.4	14	581.43	2	0	1	27	1	0	1	1	3	3	2	1	30	3	0	0
15340	11	16	12	4.28	84	4.663	4.8	285.5	0.8	70.72	2	59	3	2	1.27	19059	84.82	52.2	160.5	20.26	82.2	5.2	58	1.5	213	5.51	181	2.04	119	3.08	140.5	134	104.85	2	0	1	88	0	0	1	1	2	2	2	1	21.5	3	0	1
45753	11	16	14	5	95	5.27	6.4	380.7	0.74	65.42	2	67	4	5	5	9544.76	88.62	72.8	159	28.8	102.7	5.6	45	1.16	183	4.73	230	2.597	92	2.379	9.3	143	6.5	2	0	1	72	1	0	2	1	1	1	2	0	30	3	1	0
14157	10	16	34	12.14	93	5.162	8.2	487.7	3.9	344.76	1	24	4	3	2.4	14165.2	21.05	77	180.5	23.63	87.2	3.6	51	1.32	159	4.11	57	0.64	97	2.51	4250	134	3171.64	2	0	1	107	1	0	1	0	3	4	5	1	2.3	1	0	1
5715	38	39	10	3.6	88	4.885	6.6	392.6	0.6	53	2	64	3	3	1.55	29901.4	100.17	63.2	162	24.08	93.4	5.2	57	1.47	217	5.61	201	2.27	120	3.1	2.4	34	7.06	2	0	1	69	0	0	1	1	1	1	1	0	18.51	2	1	1
55326	37	29	7	2.5	84	4.66	3	178.4	0.56	49.5	2	51	1	1	0.02	11212.8	110.43	71.8	159.3	28.29	99.9	5.1	56	1.45	247	6.39	105	1.185	170	4.396	2	31	6.45	2	0	1	78	0	0	2	0	1	1	1	0	13.7	2	1	1
40966	34	31	9	3.21	110	6.11	7	416.4	1.3	114.92	1	48	4	4	2.73	16736.4	67.76	101.6	178.2	31.99	108.6	5.6	56	1.45	199	5.15	205	2.314	102	2.638	40.6	608	6.68	2	0	1	101	0	0	3	1	1	1	2	0	11.2	2	1	1
63736	30	30	9	3.21	108	6	6.3	374.7	1.16	102.54	1	36	4	3	1.54	30631.5	83.71	113.3	175.8	36.7	116.1	6.4	39	1.01	217	5.61	129	1.456	152	3.931	75.4	341	22.11	2	0	1	106	1	0	3	0	1	1	2	0	11.2	2	1	0
14329	27	22	23	8.21	82	4.552	3.8	226	0.6	53.04	2	64	1	1	3.39	1477.39	100.17	55.6	143.2	27.11	92.6	5.4	45	1.16	192	4.97	128	1.45	121	3.13	3.7	57	6.49	1	0	1	79	0	0	2	0	1	1	1	1	13.7	2	1	0
3116	24	23	14	5	92	5.107	5.3	315.2	0.4	35.4	1	57	1	1	1.08	6203.61	127.26	62.4	151.6	27.15	90.4	5.5	42	1.09	236	6.1	319	3.6	130	3.36	20.5	66	31.06	1	0	1	79	1	0	2	1	2	2	1	0	21.6	3	0	1
38861	24	29	14	5	175	9.71	4.9	291.5	0.9	79.56	1	73	3	2	3.79	39086.2	90.18	113.4	173.5	37.67	123.7	7	50	1.29	150	3.88	101	1.14	80	2.069	17.8	151	11.79	1	0	1	65	0	1	3	0	1	1	1	0	30	3	1	1
61964	24	31	15	5.36	91	5.05	3	178.4	0.73	64.53	2	80	3	4	1.55	40274.8	83.08	51.7	164.3	19.15	76	5.7	86	2.22	202	5.22	111	1.253	94	2.431	30.5	52	58.65	1	1	1	68	1	0	1	0	2	2	2	1	15.9	2	0	1
3678	23	21	13	4.6	87	4.829	5	297.4	0.5	44.2	2	69	1	1	1.63	1603.73	101.46	54.9	156.6	22.39	80	5.1	53	1.36	196	5.07	171	1.93	109	2.82	4	86	4.65	1	0	1	69	0	0	1	1	1	1	1	0	18.51	2	0	1
55120	23	23	7	2.5	106	5.88	6.1	362.8	1	88.4	1	55	4	2	2.77	24699.8	88.88	73.2	164.6	27.02	93.6	5.6	51	1.32	160	4.14	134	1.513	82	2.121	6.5	137	4.74	2	0	1	79	1	0	2	0	1	1	2	0	18.4	2	0	1
54743	22	27	13	4.64	105	5.83	3.3	196.3	0.79	69.84	2	78	3	2	1.37	34682	76.52	63.6	157.7	25.57	92.5	5.5	47	1.22	306	7.91	158	1.784	227	5.87	9.9	117	8.46	1	0	1	74	1	0	2	1	1	1	2	1	30	3	1	0
20596	21	29	15	5.36	89	4.94	4.1	243.9	1	88.4	2	84	3	4	3.45	9324.19	55.55	76.9	172.3	25.9	106.2	5.5	38	0.98	205	5.3	208	2.35	125	3.23	15.1	64	23.59	1	0	1	70	0	0	2	1	1	2	3	1	24.8	3	1	0
20745	21	17	14	5	96	5.329	7.4	440.2	0.8	70.72	1	62	1	1	1.94	2320.57	100.06	105.2	168.4	37.1	125.5	6	28	0.72	200	5.17	319	3.6	108	2.79	17.5	179	9.78	1	0	1	93	1	0	3	1	1	1	1	0	30	3	1	0
2144	21	16	13	4.6	92	5.107	5.8	345	0.4	35.4	2	63	3	4	3.16	28069.6	111.14	78.2	160.6	30.32	98.2	5.7	45	1.17	235	6.08	191	2.16	152	3.93	2.9	83	3.49	2	0	1	72	1	0	3	1	1	1	1	0	30	3	1	0
21702	21	18	8	2.86	115	6.38	5.5	327.1	0.8	70.72	2	62	3	4	4.51	47031.4	83.26	97.9	166.3	35.4	111.8	5.8	40	1.03	243	6.28	196	2.213	164	4.241	18.5	88	21.02	1	1	1	73	1	0	3	1	1	1	2	0	24.8	3	1	0
50354	21	27	21	7.5	94	5.22	6.5	386.6	1.12	99.01	1	65	3	4	0.59	19060.5	72.9	75.6	174.3	24.88	94.2	4.8	58	1.5	203	5.25	87	0.982	128	3.31	19	128	14.84	2	0	1	75	1	0	1	0	1	1	2	0	30	3	0	1
32200	20	26	10	3.57	107	5.94	4.4	261.7	0.7	61.88	2	60	1	1	1.9	10668.7	98.95	79	155.1	32.84	99.7	5.9	51	1.32	203	5.25	163	1.84	119	3.077	12.6	25	50.4	2	1	1	62	1	0	3	1	2	2	1	0	11.7	2	1	1
48159	20	22	34	12.14	164	9.1	11.2	666.2	2.82	249.29	1	61	4	4	2.35	6350.04	24.68	67.9	168.8	23.83	94.5	6.4	26	0.67	200	5.17	450	5.081	115	2.97	485	259	187.26	2	1	1	64	1	1	1	1	2	4	5	1	30	3	0	0
23605	19	29	14	5	87	4.83	6.1	362.8	1.1	97.24	1	85	3	1	1.24	9972.72	65.78	60.6	170.6	20.82	90.7	5.5	58	1.5	277	7.16	123	1.389	194	5.017	5	110	4.55	2	1	1	66	0	0	1	0	1	1	2	0	30	3	0	1
25959	19	25	15	5.36	105	5.83	4.5	267.7	0.8	70.72	2	59	3	5	5	98200.9	84.82	60.3	164	22.42	80	6	54	1.4	162	4.19	209	2.36	66	1.707	7.2	125	5.76	2	0	1	79	1	0	1	1	1	1	2	0	18.51	2	0	1
61998	19	15	40	14.28	78	4.33	5	297.4	10.98	970.63	1	26	5	3	4.12	26081.8	6	64.8	170.5	22.29	79.5	5.3	45	1.16	205	5.3	146	1.648	131	3.388	437.3	21	2082.38	1	1	1	99	0	0	1	1	3	4	6	1	5.6	1	0	1
15890	18	24	5	1.79	84	4.663	5.2	309.3	0.7	61.88	1	72	3	4	2.88	18124.2	97.9	71.8	175.5	23.31	93.5	5.4	65	1.68	176	4.55	96	1.08	92	2.38	3.7	50	7.4	2	0	1	63	0	0	1	0	1	1	1	0	30	3	0	1
13208	17	23	14	5	84	4.663	3.2	190.3	0.6	53.04	2	54	3	5	3.88	37393.1	106.6	65.7	172.4	22.11	73	4.8	70	1.81	195	5.04	57	0.64	114	2.95	3.5	71	4.93	1	0	1	75	0	0	1	0	1	1	1	0	6.3	1	0	1
15776	17	22	12	4.28	92	5.107	4.4	261.7	0.9	79.56	2	67	3	3	1.26	16820.7	70.07	59.9	159.3	23.6	89.1	5.8	54	1.4	238	6.15	147	1.66	155	4.01	8.5	45	18.89	1	0	1	83	1	0	1	1	1	1	2	0	18.51	2	1	1
31781	17	17	18	6.43	104	5.77	6.9	410.4	1	88.4	2	58	4	4	1.45	27793.8	65.3	127.5	163.8	47.52	130.5	6.4	52	1.34	186	4.81	103	1.163	113	2.922	51.2	138	37.1	2	0	1	81	1	1	3	0	2	2	2	1	18.51	2	1	1
39493	17	21	21	7.5	86	4.77	3.9	232	1.3	114.92	1	82	3	2	1.14	20926	54.85	64.5	163.5	24.13	97.2	5.2	42	1.09	211	5.46	209	2.36	127	3.284	282.5	97	291.24	1	0	1	65	0	0	1	1	2	3	3	1	30	3	0	1
51929	17	25	13	4.64	90	5	5.4	321.2	1.06	93.7	2	80	3	5	3.43	33429.8	53.11	51.9	151.1	22.73	79.8	5.6	67	1.73	180	4.65	69	0.779	99	2.56	3.2	68	4.71	1	1	1	55	0	0	1	0	1	2	3	1	13.7	2	0	1
49618	16	15	12	4.28	305	16.93	4.6	273.6	1.15	101.66	1	66	4	2	1.25	7750.96	70.19	82.1	173.2	27.37	93.5	12.2	42	1.09	238	6.15	133	1.502	169	4.37	1271	226	562.39	1	0	1	88	0	1	2	0	3	3	2	1	30	3	0	1
6801	16	22	19	6.8	115	6.384	5.1	303.3	0.6	53	2	69	3	4	2.67	23917.6	97.1	65.14	151	28.57	94.1	5.5	44	1.14	209	5.4	113	1.28	142	3.67	12.6	237	5.32	2	1	1	73	1	0	2	0	1	1	1	0	30	3	1	0
59211	14	18	21	7.5	88	4.88	7.1	422.3	0.69	61	2	63	4	4	2.75	14665.1	97.46	66.6	149.7	29.72	95.7	5.5	47	1.22	230	5.95	169	1.908	149	3.853	144	93	154.84	2	0	1	91	0	0	2	1	2	2	1	0	21.5	3	1	0
12217	13	25	25	8.93	103	5.718	8.5	505.6	1.3	114.92	2	84	3	3	1.11	8136.72	40.55	62.8	161.5	24.08	87.6	5.5	37	0.96	236	6.1	281	3.17	143	3.7	3.8	51	7.45	1	0	1	83	1	0	1	1	1	3	4	1	30	3	0	0
45833	13	23	18	6.43	91	5.05	6.5	386.6	0.85	75.14	2	80	3	2	1.44	31175	69.22	42.6	140.3	21.64	77.1	5.4	76	1.97	256	6.62	136	1.535	153	3.957	7.7	121	6.36	2	0	1	65	0	0	1	1	1	1	2	0	30	3	0	1
2336	10	13	15	5.4	86	4.774	3.3	196.3	0.7	61.9	2	63	3	3	5	23371.2	97.12	61.9	161.7	23.67	90	5.1	70	1.82	210	5.43	173	1.95	105	2.72	3.2	47	6.81	2	0	1	48	0	0	1	1	1	1	1	0	21.5	3	1	1
4641	66	44	9	3.2	104	5.773	6.7	398.5	0.9	79.6	1	44	4	3	0.36	11058.2	108.01	102.9	175.8	33.29	115.7	6	37	0.96	261	6.75	157	1.77	192	4.97	25.5	180	14.17	2	0	1	81	1	0	3	1	1	1	1	0	29.4	3	1	0
2933	52	34	18	6.4	99	5.495	6.3	374.7	0.9	79.6	1	25	2	2	1.6	23751.9	121.55	99	173.2	33	102	5.4	39	1	225	5.82	119	1.34	162	4.19	979	311	314.79	1	0	1	67	1	0	3	0	3	3	1	0	3.9	1	1	0
21158	51	51	17	6.07	118	6.55	7.4	440.2	0.7	61.88	2	71	1	3	1.11	4289.96	92.41	73.2	148.1	33.37	105	6.2	49	1.27	219	5.66	170	1.919	136	3.517	17.5	170	10.29	1	1	1	77	1	0	3	1	1	1	1	0	24.8	3	1	0
52808	49	42	22	7.85	131	7.27	5.3	315.2	0.92	81.33	1	80	3	4	1.94	21459.3	84.09	74.7	168.8	26.22	99.2	6.6	40	1.03	109	2.82	123	1.389	44	1.138	75.4	162	46.54	1	1	1	56	0	1	2	0	2	2	2	1	30	3	0	1
37606	46	39	12	4.28	100	5.55	5.3	315.2	0.8	70.72	1	53	3	4	5	89650.9	105.82	81.2	168.7	28.53	99	4.8	76	1.97	248	6.41	79	0.892	156	4.034	111.1	223	49.82	2	0	1	95	1	0	2	0	2	2	1	0	21.6	3	0	1
54349	44	35	14	5	101	5.61	6.4	380.7	0.98	86.63	1	37	3	2	0.93	13875.4	101.85	84.9	178.5	26.65	101.8	5.6	49	1.27	206	5.33	314	3.545	94	2.431	5.3	52	10.19	2	0	1	82	1	0	2	1	1	1	1	0	9.4	1	0	1
34697	43	27	8	2.86	83	4.61	3.8	226	0.7	61.88	2	46	4	2	2.71	25327.1	107.95	78.5	165.2	28.76	98.6	5.5	50	1.29	164	4.24	83	0.937	97	2.508	34.3	165	20.79	1	0	1	76	0	0	2	0	1	1	1	0	13.7	2	1	1
59855	41	36	11	3.93	123	6.83	5.4	321.2	0.61	53.92	2	56	1	1	1.2	12257.3	104.86	87.4	158.4	34.83	107.4	5.8	58	1.5	204	5.28	114	1.287	123	3.181	26.3	126	20.87	2	0	1	91	1	1	3	0	1	1	1	0	15.9	2	1	1
57000	38	30	19	6.78	89	4.94	8.2	487.7	1.18	104.31	1	61	4	2	4.16	12210.3	70.2	84.3	169.6	29.31	98.5	5.3	108	2.79	229	5.92	81	0.914	105	2.715	7.1	161	4.41	2	0	1	73	0	0	2	0	1	1	2	0	15.6	2	0	1
22597	36	29	17	6.07	107	5.94	5.7	339	1	88.4	2	72	4	3	1.83	18037.1	59.86	75.3	156.9	30.59	93	5.3	75	1.94	177	4.58	70	0.79	88	2.276	5.7	199	2.86	1	0	1	76	1	0	3	0	1	2	3	1	15.9	2	1	1
45123	34	30	12	4.28	108	6	4.4	261.7	1.02	90.17	1	80	3	5	2.63	22304.7	74.3	79.1	182.4	23.78	96.2	5.9	65	1.68	207	5.35	92	1.039	124	3.207	9.5	54	17.59	2	0	1	61	1	0	1	0	1	1	2	0	30	3	0	1
61181	34	26	11	3.93	109	6.05	8.2	487.7	1.12	99.01	1	50	4	2	1.27	27005.2	80.03	71.9	165.4	26.28	97.5	6.3	36	0.93	145	3.75	153	1.727	78	2.017	16.2	128	12.66	2	0	1	77	1	0	2	1	1	1	2	0	29.4	3	0	0
15929	33	37	15	5.36	92	5.107	8.7	517.5	1.2	106.08	1	70	3	4	4.19	13098.5	65.06	78.1	164.8	28.76	106.2	5.1	58	1.5	234	6.05	94	1.06	157	4.06	27.8	244	11.39	2	0	1	69	0	0	2	0	1	1	2	0	30	3	1	1
19189	32	24	12	4.28	98	5.44	5.4	321.2	0.8	70.72	2	56	3	4	5	33262.1	86.42	102.4	155.8	42.19	115.6	5.5	75	1.94	214	5.53	127	1.43	114	2.95	2.3	34	6.76	2	0	1	81	0	0	3	0	1	1	2	0	18.51	2	1	1
42123	32	26	17	6.07	105	5.83	5.7	339	0.82	72.49	1	61	2	4	1.25	7590.59	99.94	76.8	170.2	26.51	94.3	4.7	48	1.24	179	4.63	114	1.287	108	2.793	41.2	76	54.21	1	0	1	83	1	0	2	0	2	2	1	0	25.3	3	0	1
55018	32	35	10	3.57	90	5	7.2	428.3	1.01	89.28	1	67	3	4	4.12	60764.1	81.51	75.9	179.3	23.61	91.9	5.3	68	1.76	199	5.15	117	1.321	108	2.793	33.8	95	35.58	2	1	1	73	0	0	1	0	2	2	2	1	21.6	3	0	1
9106	32	26	28	10	95	5.273	4.9	291.5	0.8	70.7	1	72	3	5	5	20660.5	94.03	70.5	174.6	23.13	88.8	5.3	71	1.83	221	5.72	91	1.03	132	3.41	8.9	155	5.74	2	0	1	74	0	0	1	0	1	1	1	0	25.3	3	0	1
42740	31	30	15	5.36	114	6.33	7.4	440.2	1.23	108.73	1	73	3	5	2.14	33413	61.99	90.6	180.1	27.93	105.5	5.8	38	0.98	221	5.72	242	2.732	135	3.491	35.7	170	21	2	0	1	93	1	0	2	1	1	1	2	0	30	3	1	0
6999	31	24	23	8.2	101	5.607	7	416.4	0.6	53	2	54	3	3	5	38414.5	106.6	103.8	161.9	39.6	107.8	5.7	82	2.11	223	5.77	68	0.77	128	3.31	20.6	90	22.89	2	0	1	88	1	0	3	0	1	1	1	0	7.3	1	1	1
22458	30	24	21	7.5	122	6.77	5.2	309.3	0.6	53.04	2	64	1	1	1.98	2840.89	100.17	89.6	161.7	34.27	106	5.7	45	1.16	180	4.65	105	1.185	114	2.948	3.9	105	3.71	1	0	1	80	1	0	3	0	1	1	1	0	18.51	2	1	0
42422	30	19	13	4.64	210	11.66	5.3	315.2	0.6	53.04	1	51	1	1	2.26	10385.5	116.87	63.7	164	23.68	91.6	12	46	1.19	412	10.65	418	4.719	115	2.97	644.5	120	537.08	2	1	1	67	0	1	1	1	3	3	1	0	30	3	0	1
45433	30	27	72	25.7	132	7.33	7	416.4	2.42	213.93	2	49	3	4	0.94	30055.2	23.91	110.8	160.8	42.85	126.7	8.4	55	1.42	155	4.01	165	1.863	67	1.733	1618	98	1651.02	1	0	1	67	0	1	3	1	3	4	5	1	10	2	1	1
59109	30	29	19	6.78	77	4.27	7.1	422.3	0.88	77.79	1	68	1	1	1.32	8377.22	93.66	69.3	160.3	26.97	94.7	6.5	40	1.03	190	4.91	227	2.563	105	2.715	34.7	117	29.66	2	0	1	77	0	1	2	1	1	1	1	0	30	3	0	1
52841	29	33	14	5	89	4.94	7.3	434.2	0.98	86.63	2	80	3	3	1.94	40274.8	58.35	72.2	151.7	31.37	104.9	5.6	38	0.98	201	5.2	201	2.269	123	3.181	19.1	89	21.46	1	1	1	47	0	0	3	1	1	2	3	1	30	3	1	0
30907	28	26	13	4.64	102	5.66	6.1	362.8	0.8	70.72	1	72	1	1	1.37	3758.8	94.03	64.3	160	25.12	98.4	5.9	44	1.14	259	6.7	131	1.479	189	4.888	3.6	120	3	2	0	1	67	1	0	2	0	1	1	1	0	30	3	0	1
48599	28	24	11	3.93	89	4.94	5.6	333.1	0.92	81.33	1	57	2	3	2.23	10271.1	97.02	81.2	174.1	26.79	99	5.5	45	1.16	215	5.56	119	1.344	146	3.776	2.2	23	9.57	1	0	1	79	0	0	2	0	1	1	1	0	21.6	3	0	1
46097	27	28	18	6.43	121	6.72	6	356.9	0.82	72.49	1	74	3	1	1.97	26604	92.18	90.3	172.1	30.49	106.7	5.7	29	0.75	150	3.88	161	1.818	89	2.302	8.2	202	4.06	1	1	1	63	1	1	3	1	1	1	1	0	30	3	1	0
51834	27	21	16	5.71	350	19.43	3.6	214.1	0.58	51.27	2	66	1	1	0.63	7050.96	99.74	49	146.5	22.83	86.1	12.3	48	1.24	250	6.47	320	3.613	138	3.569	439	19	2310.53	1	1	1	81	0	1	1	1	3	3	1	0	30	3	0	0
2596	26	21	17	6.1	90	4.996	9	535.3	0.9	79.6	1	73	1	1	0.97	1383.02	90.18	92.7	164.9	34.09	110.7	5.4	37	0.97	256	6.62	235	2.65	115	2.97	6.7	140	4.79	2	1	1	75	0	0	3	1	1	1	1	0	30	3	1	0
10411	25	28	8	2.86	92	5.107	8.2	487.7	0.9	79.56	2	85	4	4	0.55	6699.93	62.65	90.9	164.6	33.55	106.4	5.8	78	2.02	286	7.4	108	1.22	186	4.81	12.7	72	17.64	1	0	1	58	1	0	3	0	1	1	2	0	21.5	3	1	1
4758	25	22	18	6.4	105	5.829	6.3	374.7	0.7	61.9	2	73	4	2	5	10030.8	91.26	116.4	165.4	42.55	129.7	5.3	70	1.8	230	5.95	124	1.4	115	2.97	10.7	58	18.45	1	1	1	70	1	0	3	0	1	1	1	0	27.5	3	1	1
61885	25	23	12	4.28	94	5.22	5	297.4	0.62	54.81	2	53	1	1	4.51	8554.76	106.42	69.2	159.6	27.17	92.5	5.4	67	1.73	285	7.37	174	1.964	183	4.732	10.4	94	11.06	1	0	1	70	1	0	2	1	1	1	1	0	10	2	1	1
9715	25	20	12	4.3	89	4.94	5.8	345	0.6	53	2	60	1	2	1.27	1289.2	102.69	61.8	158.8	24.51	91	5.4	56	1.45	217	5.61	250	2.82	111	2.87	9.1	115	7.91	2	0	1	76	0	0	1	1	1	1	1	0	24.8	3	1	1
13984	24	21	27	9.64	97	5.384	6.1	362.8	0.8	70.72	2	73	3	3	1.71	24655.5	77.75	65.6	150.1	29.12	95.3	5.8	46	1.19	182	4.71	160	1.81	104	2.69	7.8	65	12	1	0	1	57	1	0	2	1	1	1	2	1	18.51	2	1	0
49721	24	28	6	2.14	95	5.27	5.3	315.2	0.92	81.33	1	64	4	3	4.41	5758.08	92.89	73.8	178.4	23.19	92.4	5.8	54	1.4	228	5.9	107	1.208	153	3.957	27.2	264	10.3	2	0	1	78	1	0	1	0	1	1	1	0	30	3	0	1
57034	24	27	15	5.36	96	5.33	6.3	374.7	0.79	69.84	2	64	5	4	1.01	22946.8	83.48	61.4	149	27.66	91.7	6.4	59	1.53	242	6.26	199	2.247	143	3.698	4.1	32	12.81	2	0	1	62	1	0	2	1	1	1	2	0	21.5	3	1	1
622	24	26	12	4.3	76	4.219	4.4	261.7	0.5	44.2	2	82	3	4	3.38	9718.1	93.58	55.8	160.6	21.63	73.4	5	66	1.7	175	4.53	123	1.39	84	2.17	2.4	18	13.33	1	0	1	77	0	0	1	0	1	1	1	0	18.51	2	0	1
25180	23	21	16	5.71	102	5.66	4.2	249.8	0.9	79.56	2	79	1	1	2.97	4289.96	65.03	66	153.1	28.16	97.3	5.6	58	1.5	357	9.23	392	4.426	221	5.715	8.8	84	10.48	1	0	1	56	1	0	2	1	1	1	2	0	24.8	3	1	1
35157	23	27	9	3.21	209	11.6	3.5	208.2	1.4	123.76	1	46	4	5	0	16736.4	62.77	87.3	177.1	27.83	98.1	11.2	48	1.24	124	3.21	96	1.084	57	1.474	2.5	42	5.95	1	0	1	73	0	1	2	0	1	1	2	0	11.2	2	0	1
36728	23	27	25	8.93	133	7.38	8.2	487.7	1	88.4	2	69	3	4	2.27	62731.7	60.98	96.6	153.7	40.89	125.8	6	60	1.55	195	5.04	143	1.614	106	2.741	16.9	203	8.33	1	0	1	49	1	1	3	1	1	1	2	0	24.8	3	1	1
16560	22	27	15	5.36	93	5.162	2.7	160.6	0.8	70.72	2	76	1	2	4.77	1941.59	76.31	57.4	148.4	26.06	89.5	5.4	71	1.84	237	6.13	210	2.37	124	3.21	6.5	18	36.11	2	0	1	75	0	0	2	1	2	2	2	1	21.5	3	1	1
22047	22	22	11	3.93	99	5.5	4.3	255.8	0.6	53.04	2	72	1	3	5	5524.43	95.31	58.4	159.6	22.93	93.7	5.5	61	1.58	190	4.91	139	1.569	101	2.612	22.4	115	19.48	1	0	1	75	0	0	1	1	1	1	1	0	21.5	3	1	1
22254	22	21	12	4.28	157	8.72	6.1	362.8	0.9	79.56	2	58	3	1	1.2	45002.9	74.1	82.2	168.3	29.02	103.6	7.1	44	1.14	242	6.26	182	2.055	162	4.189	100.8	92	109.57	1	1	1	62	0	1	2	1	2	2	2	1	24.8	3	1	0
26501	22	29	19	6.78	148	8.22	4.3	255.8	1.5	132.6	1	77	1	1	1.5	2209.22	47.65	67.5	160.8	26.11	94	7.3	38	0.98	149	3.85	261	2.947	59	1.526	810	77	1051.95	2	0	1	59	0	1	2	1	3	4	3	1	30	3	0	0
36791	22	27	15	5.36	109	6.05	4.3	255.8	0.9	79.56	1	75	4	3	0.96	11996	89.07	88.1	169.3	30.74	109.6	6.4	62	1.6	174	4.5	79	0.892	96	2.483	18.3	79	23.16	1	0	1	95	1	0	3	0	1	1	2	0	30	3	1	1
39690	22	21	18	6.43	96	5.33	5.4	321.2	1	88.4	1	69	1	1	1.9	4718.56	81.47	67.6	164.8	24.89	96.3	4.9	60	1.55	235	6.08	87	0.982	158	4.086	4.4	56	7.86	2	0	1	83	0	0	1	0	1	1	2	0	30	3	0	1
47395	22	22	12	4.28	95	5.27	6.4	380.7	0.87	76.91	1	40	3	5	5	75464.1	111.87	92.3	189.2	25.78	102.2	5.2	27	0.7	165	4.27	337	3.805	71	1.836	14.2	227	6.26	2	0	1	101	1	0	2	1	1	1	1	0	9.4	1	1	0
57561	22	25	7	2.5	94	5.22	5.3	315.2	1.1	97.24	1	43	4	2	1.29	20585.8	85.42	80.9	167.1	28.97	96.8	5.8	82	2.12	179	4.63	75	0.847	82	2.121	2.4	64	3.75	2	0	1	81	1	0	2	0	1	1	2	0	4.7	1	0	1
6000	22	22	23	8.2	152	8.438	7.4	440.2	0.8	70.7	2	77	3	1	2.4	37136.1	75.84	78.14	167.6	27.82	100.4	8.5	36	0.93	161	4.16	181	2.04	89	2.3	36.8	135	27.26	1	0	1	50	0	1	2	1	1	1	2	0	27.5	3	1	0
64313	22	18	13	4.64	90	5	6.4	380.7	1.15	101.66	1	65	1	3	4.59	14067.2	70.63	74.8	170.4	25.8	95.7	5.8	44	1.14	173	4.47	166	1.874	96	2.483	7.2	137	5.26	2	0	1	92	1	0	2	1	1	1	2	0	30	3	0	1
16418	21	22	10	3.57	98	5.44	5.9	350.9	0.8	70.72	2	53	5	1	0.94	32847.4	88.05	61	151.1	26.72	95.4	5.8	30	0.78	245	6.34	161	1.82	183	4.73	3.6	124	2.9	1	0	1	99	1	0	2	1	1	1	2	0	15.9	2	1	0
18614	21	26	7	2.5	78	4.33	6.8	404.5	0.9	79.56	1	52	4	2	3.84	17341.9	102.76	72.5	171.6	24.62	84.6	5.6	65	1.68	219	5.66	118	1.33	130	3.36	10.7	201	5.32	2	0	1	88	0	0	1	0	1	1	1	0	18.4	2	0	1
1963	21	38	14	5	89	4.94	7.5	446.1	0.7	61.9	1	62	3	3	2.47	24004.5	104.18	89.3	184.6	26.21	105.1	5.3	101	2.61	203	5.25	56	0.63	91	2.35	15.3	363	4.21	2	0	1	89	0	0	2	0	1	1	1	0	29.4	3	1	1
35495	21	26	12	4.28	98	5.44	3.8	226	0.7	61.88	2	76	1	1	1.07	10668.7	89.58	52.2	151.6	22.71	87.5	5.5	61	1.58	219	5.66	88	0.994	140	3.62	4.8	40	12	1	0	1	60	1	0	1	0	1	1	2	0	18.51	2	0	1
43269	21	25	14	5	91	5.05	6.2	368.8	0.92	81.33	2	65	3	3	1.16	22713.6	69.1	101.3	166	36.76	124	6.1	42	1.09	234	6.05	166	1.874	159	4.112	1.4	44	3.18	1	1	1	59	1	0	3	1	1	1	2	0	18.51	2	1	0
12371	20	19	15	5.36	163	9.048	8.7	517.5	1.3	114.92	1	62	4	3	3.9	4000.81	62.11	94.5	169.6	32.85	113.8	7	34	0.88	118	3.05	215	2.43	115	2.97	17	105	16.19	2	0	1	50	0	1	3	1	1	1	2	0	30	3	1	0
27810	20	17	13	4.64	204	11.32	4.2	249.8	0.7	61.88	2	71	1	2	1.34	5179.16	92.41	66.2	153.5	28.1	95.3	7.9	41	1.06	297	7.68	763	8.614	115	2.97	28.5	47	60.64	1	0	1	67	0	1	2	1	2	2	1	0	27.5	3	1	0
36575	20	23	7	2.5	98	5.44	5.8	345	0.9	79.56	1	35	3	2	2.6	38909.5	114.22	70.2	178.4	22.06	90	5.8	41	1.06	219	5.66	315	3.556	115	2.974	6.8	100	6.8	2	0	1	79	1	0	1	1	1	1	1	0	11.2	2	0	1
39265	20	24	12	4.28	112	6.22	4.4	261.7	1	88.4	1	71	3	3	2	41236.4	80.47	72.7	168.6	25.58	96	5.9	53	1.37	229	5.92	144	1.626	147	3.801	5.3	93	5.7	1	0	1	84	1	1	2	1	1	1	2	0	30	3	0	1
16898	19	26	17	6.07	91	5.051	7.6	452	1.3	114.92	1	82	3	2	5	9383.86	54.85	75.6	168	26.79	99.8	5.2	54	1.4	174	4.5	107	1.21	99	2.56	5.4	118	4.58	2	0	1	60	0	0	2	0	1	2	3	1	29.4	3	0	1
26092	19	29	13	4.64	116	6.44	7.4	440.2	1	88.4	1	60	3	3	1.5	50864.4	86.16	86	178.2	27.08	103.6	5.9	41	1.06	154	3.98	69	0.779	99	2.56	13.2	195	6.77	1	1	1	81	1	0	2	0	1	1	2	0	30	3	1	1
57573	19	33	18	6.43	109	6.05	0.4	23.8	0.82	72.49	2	74	5	3	1.01	21047.3	75.01	52.5	142.1	26	90.8	6.5	59	1.53	211	5.46	189	2.134	114	2.948	44.3	36	123.06	2	0	1	67	1	1	2	1	2	2	2	1	30	3	1	1
7087	19	24	13	4.6	82	4.552	4.6	273.6	0.6	53	2	60	4	5	5	5994.55	102.69	56.4	160.6	21.87	81.1	5.4	65	1.67	270	6.98	75	0.85	190	4.91	1.6	31	5.16	2	0	1	88	0	0	1	0	1	1	1	0	11.7	2	0	1
15863	18	28	12	4.28	262	14.544	4.6	273.6	0.8	70.72	2	81	4	2	0.47	6682.81	73.98	68.1	161	26.27	103.1	8.3	35	0.91	211	5.46	359	4.05	115	2.97	10.7	85	12.59	1	0	1	69	0	1	2	1	1	1	2	0	24.8	3	1	0
55698	18	21	24	8.57	178	9.88	8.1	481.8	1.75	154.7	1	80	4	1	1.55	10237.7	38.87	97.6	175.8	31.58	116	6.6	49	1.27	150	3.88	124	1.4	76	1.965	20.5	60	34.17	2	1	1	36	0	1	3	0	2	4	4	1	30	3	1	1
60198	18	18	7	2.5	139	7.72	3.9	232	0.68	60.11	2	61	2	3	3.43	8526.03	99.02	101.6	161.8	38.81	119.9	6.7	45	1.16	253	6.54	140	1.581	180	4.655	129.9	140	92.79	1	0	1	83	0	1	3	1	2	2	1	0	18.51	2	1	0
13044	17	25	13	4.64	92	5.107	5.7	339	0.9	79.56	2	85	4	2	1.85	7079.77	62.65	58.7	139.9	29.99	85.5	5.9	69	1.78	204	5.28	92	1.04	117	3.03	8.9	112	7.95	1	0	1	71	1	0	2	0	1	1	2	0	24.8	3	0	1
30051	17	19	17	6.07	81	4.5	6.2	368.8	0.9	79.56	2	79	3	3	2.8	45830.5	65.03	62.6	155.6	25.86	94.5	4.8	46	1.19	218	5.64	200	2.258	132	3.414	2	23	8.7	2	0	1	81	0	0	2	1	1	1	2	0	30	3	1	0
54348	17	21	31	11.07	95	5.27	4.7	279.6	9.38	829.19	1	80	3	4	2.26	18263.6	5.18	67.8	159.4	26.68	99.5	5.3	34	0.88	210	5.43	188	2.123	138	3.569	56	53	105.66	1	1	1	53	1	0	2	1	2	4	6	1	30	3	0	0
23829	16	18	7	2.5	93	5.16	3.7	220.1	0.7	61.88	2	37	4	2	1.36	35810.1	114.16	90.4	166.6	32.57	94.3	5.1	43	1.11	142	3.67	49	0.553	89	2.302	54.1	243	22.26	2	0	1	81	0	0	3	0	1	1	1	0	6.3	1	1	0
3985	16	19	16	5.7	140	7.771	6.7	398.5	0.9	79.6	1	75	1	5	4.03	996.954	89.07	84.9	173.1	28.33	108.3	7.4	45	1.17	179	4.63	61	0.69	122	3.15	7.4	73	10.14	2	0	1	52	0	1	2	0	1	1	2	0	30	3	1	1
45293	16	27	17	6.07	96	5.33	4.6	273.6	0.62	54.81	2	76	1	3	0.73	10060.8	92.23	45.5	154.3	19.11	77.1	5.8	39	1.01	165	4.27	113	1.276	103	2.664	10.4	65	16	2	0	1	59	1	0	1	0	1	1	1	0	21.5	3	0	0
51332	16	19	9	3.21	98	5.44	4.6	273.6	1.06	93.7	1	51	4	2	1.3	26077.3	84.97	109.5	168	38.8	113.5	5.8	68	1.76	172	4.45	43	0.485	95	2.457	1114	326	341.72	1	1	1	95	1	1	3	0	3	3	2	1	21.6	3	1	1
58230	16	15	10	3.57	95	5.27	6.6	392.6	0.74	65.42	1	60	4	4	1.82	7623.09	103.73	95.3	167.9	33.81	114.3	5.9	55	1.42	231	5.97	69	0.779	162	4.189	6.2	92	6.74	1	0	1	93	1	0	3	0	1	1	1	0	30	3	1	1
5856	16	16	8	2.9	91	5.051	7.8	463.9	0.8	70.7	1	84	3	1	1.13	9825.26	87.27	84.9	171.5	28.87	111	5.1	57	1.47	193	4.99	126	1.42	111	2.87	34.7	133	26.09	1	1	1	76	0	0	2	0	1	1	2	1	30	3	1	1
61484	16	19	12	4.28	92	5.11	6.6	392.6	0.61	53.92	2	37	2	1	0.19	21785.2	118.01	86.1	159	34.06	109.5	5.2	51	1.32	184	4.76	151	1.705	103	2.664	42.7	161	26.52	2	0	1	92	0	0	3	1	1	1	1	0	4.5	1	1	1
64130	16	20	12	4.28	101	5.61	6.2	368.8	0.66	58.34	1	69	5	2	1.72	13977.8	101.53	66.4	166.7	23.9	97	7.5	39	1.01	123	3.18	130	1.468	58	1.5	395	69	572.46	1	0	1	77	1	1	1	0	3	3	1	0	30	3	1	0
45089	15	19	15	5.36	91	5.05	6.6	392.6	0.92	81.33	1	79	3	1	1.47	8872.86	84.62	83.8	169	29.34	113.1	5	36	0.93	185	4.78	213	2.405	106	2.741	206.5	155	133.23	2	0	1	77	0	0	2	1	2	2	2	1	30	3	1	0
63466	15	16	8	2.86	105	5.83	6.2	368.8	0.94	83.1	1	49	4	3	2.19	17602.1	99.37	70.7	176.1	22.8	85	4.9	65	1.68	240	6.21	82	0.926	159	4.112	14	336	4.17	2	0	1	76	1	0	1	0	1	1	1	0	18.4	2	0	1
64979	15	19	8	2.86	110	6.11	5.2	309.3	1.02	90.17	2	47	4	2	0.19	18823	68.28	104.4	156	42.9	113.1	6.5	49	1.27	186	4.81	120	1.355	113	2.922	1.8	32	5.63	2	0	1	77	1	1	3	0	1	1	2	0	7.3	1	1	0
2057	14	20	19	6.8	87	4.829	6.2	368.8	1.1	97.2	1	83	3	3	3.16	8104.26	66.61	74.7	177.1	23.82	89.3	5.1	66	1.71	147	3.8	73	0.82	66	1.71	17.2	66	26.06	2	0	1	76	0	0	1	0	1	1	2	0	30	3	0	1
50507	14	14	17	6.07	97	5.38	5	297.4	0.66	58.34	1	74	2	5	0.86	6077.3	98.42	62.4	154.7	26.07	97	6.1	57	1.47	141	3.65	74	0.835	69	1.784	29.6	75	39.47	1	1	1	78	1	1	2	0	2	2	1	0	30	3	0	1
57449	14	15	7	2.5	132	7.33	4.1	243.9	0.59	52.16	1	77	4	1	1.1	14147.9	99.93	70.8	163.9	26.36	96.7	7.1	48	1.24	213	5.51	170	1.919	131	3.388	26.4	140	18.86	1	0	1	82	0	1	2	1	1	1	1	0	30	3	0	1
11389	13	18	14	5	78	4.33	5.7	339	1.1	97.24	1	65	3	4	1.21	14497.4	74.5	63.2	181.6	19.16	85.1	5.5	42	1.09	135	3.49	63	0.71	80	2.07	18	170	10.59	1	0	1	95	0	0	1	0	1	1	2	0	30	3	0	1
3333	13	19	16	5.7	104	5.773	4.8	285.5	0.5	44.2	2	80	3	4	2.99	9718.1	94.76	84.6	158.7	33.59	106.7	6.1	47	1.22	324	8.38	459	5.18	115	2.97	14.3	83	17.23	1	0	1	80	1	0	3	1	1	1	1	0	30	3	1	0
46733	13	18	10	3.57	103	5.72	4	237.9	0.62	54.81	2	41	3	3	2.42	30055.2	114.66	85.6	166.5	30.88	102	5.6	53	1.37	222	5.74	82	0.926	153	3.957	1.4	33	4.24	1	0	1	79	1	0	3	0	1	1	1	0	5.3	1	1	1
47821	13	21	17	6.07	153	8.49	6.2	368.8	0.92	81.33	2	80	2	1	1.37	6340.4	62.94	69.9	150.6	30.82	106.7	7.3	61	1.58	169	4.37	99	1.118	88	2.276	548.5	40	1371.25	1	0	1	51	0	1	3	0	3	3	2	1	15.9	2	1	1
44123	12	21	5	1.79	73	4.05	2.4	142.8	0.84	74.26	1	54	3	3	0.72	34162.8	103.63	59.1	171.5	20.09	82.1	6.6	66	1.71	160	4.14	64	0.723	81	2.095	20.8	27	77.04	2	0	1	69	0	1	1	0	2	2	1	0	15.6	2	0	1
29352	9	20	7	2.5	95	5.27	5.3	315.2	0.9	79.56	1	79	4	4	1.56	18844	86.88	64.3	154.8	26.83	101.4	5.6	60	1.55	202	5.22	70	0.79	128	3.31	44	67	65.67	2	0	1	83	0	0	2	0	2	2	2	1	30	3	0	1
60721	105	148	4	1.43	100	5.55	3.4	202.2	0.74	65.42	1	40	3	3	4.43	79849.2	117.47	91.3	188.9	25.59	98.3	4.9	113	2.92	201	5.2	41	0.463	80	2.069	28.6	112	25.54	2	0	1	99	1	0	2	0	1	1	1	0	11.2	2	0	1
20756	78	36	10	3.57	104	5.773	5.4	321.2	0.7	61.88	1	36	1	1	0.38	8314.8	122.47	88	167.5	31.37	106.3	5.8	35	0.91	274	7.09	407	4.6	115	2.97	4.7	45	10.44	2	0	1	87	1	0	3	1	1	1	1	0	13.3	2	1	0
6795	56	37	16	5.7	101	5.607	8.5	505.6	0.9	79.6	1	56	3	4	5	47922.1	100.24	95.6	162.8	36.07	117.6	5.1	39	1.02	186	4.81	148	1.67	117	3.03	4.9	151	3.25	2	0	1	88	0	0	3	1	1	1	1	0	18.4	2	1	0
56983	43	29	19	6.78	95	5.27	4.4	261.7	1.07	94.59	1	39	3	3	5	67440.7	90.53	89	180.9	27.2	97.8	4.6	39	1.01	251	6.49	159	1.795	180	4.655	251.5	94	267.55	2	0	1	110	1	0	2	1	2	2	1	0	6.7	1	0	0
47233	39	35	14	5	184	10.21	4.8	285.5	0.56	49.5	2	61	1	1	0.65	5164.55	103.77	69.3	149.2	31.13	105.2	8.1	44	1.14	236	6.1	300	3.387	132	3.414	16.2	68	23.82	1	0	1	79	0	1	3	1	1	1	1	0	21.5	3	1	0
20150	33	38	7	2.5	81	4.496	3.4	202.2	0.7	61.88	2	49	3	3	3.77	46207	105.95	58.4	154.5	24.47	85.3	5.3	62	1.6	293	7.58	146	1.65	202	5.22	17.6	131	13.44	2	0	1	84	0	0	1	1	1	1	1	0	13.7	2	0	1
21033	29	32	9	3.21	100	5.55	6.6	392.6	1	88.4	2	57	4	3	0.33	24726.4	65.71	90.3	167.8	32.07	103	5.7	53	1.37	195	5.04	137	1.547	115	2.974	43.2	270	16	1	0	1	73	1	0	3	1	1	1	2	0	11.7	2	1	1
3991	25	29	14	5	143	7.938	7.5	446.1	0.7	61.9	2	80	3	3	0.96	38921.5	87.38	60.7	159.4	23.89	98.4	6.2	38	0.98	153	3.96	216	2.44	72	1.86	116.8	134	87.16	1	0	1	64	1	1	1	1	2	2	2	1	27.5	3	1	0
45894	25	21	20	7.14	327	18.15	5.2	309.3	0.92	81.33	1	60	3	4	5	39670	95.23	106.3	188.5	29.92	112.1	11.6	67	1.73	196	5.07	211	2.382	87	2.25	23.9	106	22.55	2	0	1	55	0	1	2	1	1	1	1	0	30	3	1	1
50170	24	24	12	4.28	94	5.22	4	237.9	0.77	68.07	2	63	2	1	1.38	7294.6	86.62	52	149.4	23.3	75.7	5.5	69	1.78	179	4.63	87	0.982	93	2.405	10	121	8.26	1	0	1	65	0	0	1	0	1	1	2	0	11.7	2	0	1
10454	23	28	33	11.78	85	4.718	6.7	398.5	1	88.4	2	83	3	4	1.35	7194.75	55.9	62.8	149.5	28.1	92	5.1	108	2.79	233	6.03	170	1.92	91	2.35	0.9	75	1.2	2	0	1	47	0	0	2	1	1	2	3	1	21.5	3	1	1
50910	23	23	16	5.71	99	5.5	4.9	291.5	0.62	54.81	2	60	3	3	2.15	55604.4	101.89	69.7	166.7	25.08	84.6	5.4	68	1.76	187	4.84	96	1.084	100	2.586	11.5	80	14.38	1	0	1	79	1	0	2	0	1	1	1	0	7.3	1	0	1
12514	22	18	15	5.36	90	4.996	5.2	309.3	1.2	106.08	1	40	4	3	4.35	8442.84	78.4	83	173.7	27.51	88.6	5.4	46	1.19	184	4.76	77	0.87	123	3.18	36	396	9.09	2	0	1	113	0	0	2	0	1	1	2	0	7.9	1	0	1
62929	22	26	13	4.64	100	5.55	6.9	410.4	1.12	99.01	1	68	4	4	2.35	9221.19	71.56	79.8	168.5	28.1	100.6	6.2	48	1.24	172	4.45	135	1.524	97	2.508	112.3	115	97.65	1	0	1	75	1	0	2	1	2	2	2	1	30	3	0	1
29175	21	18	21	7.5	300	16.65	6	356.9	0.8	70.72	2	52	4	4	4.95	28164	88.6	145.4	169.1	50.85	138.2	11.1	64	1.66	278	7.19	138	1.558	186	4.81	1940	103	1883.5	2	0	1	93	0	1	3	1	3	3	2	1	18.51	2	1	1
57457	21	26	21	7.5	82	4.55	5.7	339	0.83	73.37	2	77	3	4	2.39	37776.8	72.56	73.1	160	28.55	102	5	55	1.42	243	6.28	115	1.298	165	4.267	6.4	57	11.23	2	0	1	49	0	0	2	0	1	1	2	0	21.5	3	1	1
17865	20	25	14	5	95	5.273	8.8	523.4	1.2	106.08	1	78	3	3	1.24	6581.54	61.9	100.7	178.9	31.46	118.3	5.4	36	0.93	198	5.12	277	3.13	107	2.77	35.7	147	24.29	2	0	1	63	1	0	3	1	1	1	2	0	30	3	1	0
25996	20	22	7	2.5	94	5.22	5.7	339	0.9	79.56	1	73	1	1	1.09	4264.57	90.18	69.4	167.2	24.82	98.5	5.4	26	0.67	156	4.03	385	4.347	53	1.371	4.7	94	5	2	0	1	67	1	0	1	1	1	1	1	0	30	3	0	0
31334	20	24	5	1.79	100	5.55	5.8	345	0.8	70.72	2	55	4	5	0.31	34121.7	86.96	108.3	158.7	43	109.4	5.4	103	2.66	252	6.52	69	0.779	135	3.491	29.2	216	13.52	1	0	1	86	0	0	3	0	1	1	2	0	13.7	2	1	1
40852	19	33	18	6.43	83	4.61	5	297.4	1.3	114.92	1	85	3	4	1.89	20926	53.83	55.4	165.7	20.18	83	5.1	80	2.07	240	6.21	88	0.994	142	3.672	5.1	94	5.43	2	0	1	47	0	0	1	0	1	2	3	1	30	3	0	1
64759	19	26	15	5.36	92	5.11	7.2	428.3	1.14	100.78	1	80	3	1	1.63	52279.5	65.01	62.3	158.4	24.8	101.8	5.5	38	0.98	226	5.84	227	2.563	143	3.698	37	201	18.41	2	1	1	67	0	0	1	1	1	1	2	0	30	3	0	0
18131	18	22	10	3.57	136	7.549	6.9	410.4	0.9	79.56	2	62	3	4	5	18257.9	72.28	77.8	153.9	32.85	110.4	5.5	54	1.4	222	5.74	170	1.92	134	3.47	4.2	205	2.05	2	0	1	82	0	1	3	1	1	1	2	0	18.51	2	1	1
17446	17	30	10	3.57	91	5.051	3.5	208.2	1	88.4	1	59	4	2	3.05	15434.8	86.7	60.8	164	22.61	85.6	5.5	58	1.5	283	7.32	208	2.35	183	4.73	6.1	189	3.23	2	0	1	87	0	0	1	1	1	1	2	0	30	3	0	1
6781	17	22	12	4.3	84	4.663	5.1	303.3	0.8	70.7	1	43	4	2	1.85	17444.4	112.61	78.4	168.3	27.68	92.3	5.1	58	1.51	248	6.41	69	0.78	176	4.55	8.2	87	9.43	2	0	1	98	0	0	2	0	1	1	1	0	11.2	2	0	1
56954	16	21	9	3.21	112	6.22	5.2	309.3	0.81	71.6	2	75	4	4	3.09	13732.1	75.65	95.2	164.9	35.01	103	7.6	81	2.09	167	4.32	88	0.994	68	1.758	10.5	286	3.67	1	0	1	77	1	1	3	0	1	1	2	0	27.5	3	1	1
55000	15	18	7	2.5	123	6.83	4.6	273.6	0.57	50.39	2	52	1	1	0.74	17473.1	109.27	80.8	161.6	30.94	105.5	6.5	39	1.01	213	5.51	255	2.879	123	3.181	3.5	48	7.29	2	1	1	83	0	1	3	1	1	1	1	0	24.8	3	1	0
20796	14	16	21	7.5	151	8.382	6.5	386.6	0.9	79.56	2	74	4	3	5	5292.38	67.08	63.3	147.1	29.25	99.7	7.1	39	1.01	195	5.04	149	1.68	115	2.97	4.4	67	6.57	1	1	1	60	0	1	2	1	1	1	2	0	24.8	3	1	0
60011	14	21	15	5.36	118	6.55	5	297.4	0.91	80.44	1	67	1	2	3.09	8377.22	92.38	73.2	167.2	26.18	94.4	7.6	51	1.32	148	3.83	85	0.96	80	2.069	13.8	152	9.08	2	1	1	68	0	1	2	0	1	1	1	0	29.4	3	0	1
18555	12	26	20	7.14	95	5.273	6.2	368.8	1.8	159.12	1	83	3	5	2.09	9504.56	36.89	83.3	166.9	29.9	111.3	5.2	34	0.88	141	3.65	174	1.96	72	1.86	46	49	93.88	2	1	1	85	1	0	2	1	2	4	4	1	30	3	1	0
861	12	15	13	4.6	110	6.106	4.8	285.5	0.4	35.4	2	72	3	3	5	27216.6	105.09	52.8	152.7	22.64	81.5	5.9	47	1.22	177	4.58	210	2.37	88	2.28	22	67	32.84	2	1	1	54	1	0	1	1	2	2	1	0	30	3	0	0
8003	9	17	10	3.6	99	5.495	4.7	279.6	0.4	35.4	2	68	1	1	1.5	1541.12	107.74	73.4	158.3	29.29	96.5	5.7	57	1.48	225	5.82	96	1.08	149	3.85	1.1	20	5.5	1	0	1	73	1	0	2	0	1	1	1	0	13.7	2	1	1
11142	114	156	27	9.64	101	5.607	10.4	618.6	1.6	141.44	1	50	1	2	0.9	7138.2	52.17	75.1	169.1	26.26	97.2	4.8	30	0.78	176	4.55	137	1.55	119	3.08	234.5	143	163.99	2	1	1	68	1	0	2	1	2	3	3	1	30	3	0	0
51694	92	51	13	4.64	189	10.49	6.6	392.6	0.71	62.76	1	38	3	4	1.15	17999.3	120.43	117.3	180.9	35.84	121.5	10.3	36	0.93	181	4.68	149	1.682	115	2.974	56.6	304	18.62	1	0	1	82	0	1	3	1	1	1	1	0	4.7	1	1	0
31124	85	55	11	3.93	107	5.94	5.9	350.9	0.9	79.56	1	44	1	2	3.93	17305	108.01	89.7	173.4	29.83	103.3	5.6	51	1.32	282	7.29	307	3.466	170	4.396	12.8	257	4.98	2	0	1	92	1	0	2	1	1	1	1	0	18.4	2	1	1
58972	78	152	9	3.21	78	4.33	6.8	404.5	0.91	80.44	1	42	1	1	1.72	16818.4	107.92	59.1	170.5	20.33	79.4	5.2	144	3.72	247	6.39	62	0.7	91	2.353	59.9	185	32.38	2	0	1	85	0	0	1	0	2	2	1	0	13.3	2	0	1
58071	66	43	9	3.21	91	5.05	7.5	446.1	0.81	71.6	1	27	3	4	0.36	22939.8	123.93	100.6	185.8	29.14	101.9	5.2	26	0.67	171	4.42	246	2.777	96	2.483	30.8	287	10.73	2	0	1	111	1	0	2	1	1	1	1	0	7.9	1	0	0
53580	56	54	9	3.21	103	5.72	4.4	261.7	0.74	65.42	1	60	4	2	1.39	10549.8	103.73	168.6	185.9	48.79	148.5	5.9	43	1.11	99	2.56	112	1.264	34	0.879	955	173	552.02	2	1	1	77	1	1	3	0	3	3	1	0	30	3	1	1
44988	47	37	17	6.07	91	5.05	8.2	487.7	1.12	99.01	1	79	3	4	1.83	26604	66.82	79.6	170.6	27.35	111.4	5.1	66	1.71	260	6.72	281	3.172	138	3.569	11.1	186	5.97	2	1	1	79	1	0	2	1	1	1	2	0	30	3	1	1
1782	46	77	10	3.6	93	5.162	4.6	273.6	0.4	35.4	2	62	1	3	1.13	1603.73	111.84	61.9	152.8	26.51	78.8	5.6	48	1.25	179	4.63	163	1.84	98	2.53	14.2	98	14.49	1	1	1	69	0	0	2	1	1	1	1	0	11.7	2	0	0
20459	39	34	10	3.57	92	5.107	5	297.4	0.7	61.88	2	45	1	3	3.61	5196.66	108.62	77.2	159.1	30.5	96	5.2	56	1.45	262	6.78	275	3.1	151	3.9	5.1	48	10.63	2	0	1	79	0	0	3	1	1	1	1	0	15.9	2	1	1
45826	37	41	12	4.28	90	5	6.9	410.4	0.72	63.65	2	62	3	4	1.49	22473.4	94.48	81.9	162.7	30.94	107.5	5.1	51	1.32	273	7.06	155	1.75	191	4.939	2.1	33	6.36	2	1	1	77	0	0	3	1	1	1	1	0	13.7	2	1	1
33592	34	33	17	6.07	105	5.83	7.5	446.1	1.2	106.08	1	62	4	3	5	6507.9	68.38	77.6	177.4	24.66	92.5	5.6	39	1.01	202	5.22	231	2.608	117	3.026	22.4	191	11.73	2	1	1	90	1	0	1	1	1	1	2	0	30	3	0	0
37196	33	25	17	6.07	100	5.55	5.2	309.3	0.7	61.88	2	50	1	2	5	21707.4	105.3	58	155.1	24.11	81.3	5.7	37	0.96	228	5.9	146	1.648	162	4.189	11.5	62	18.55	2	0	1	80	1	0	1	1	1	1	1	0	11.7	2	0	0
23161	32	30	13	4.64	100	5.55	7.5	446.1	1	88.4	1	51	3	4	5	104202	91.12	106.9	190.7	29.4	113	5.6	49	1.27	247	6.39	71	0.802	184	4.758	10	144	6.94	2	0	1	99	1	0	2	0	1	1	1	0	29.4	3	1	1
7542	32	22	11	3.9	96	5.329	3.5	208.2	0.6	53	2	40	1	3	1.99	4375.68	116.3	76.9	167	27.57	91.1	5.5	26	0.68	198	5.12	252	2.85	121	3.13	50	244	20.49	1	0	1	107	1	0	2	1	1	1	1	0	11.7	2	1	0
27467	28	32	8	2.86	84	4.66	4.9	291.5	0.8	70.72	2	28	4	3	0.66	27080.1	102.86	117.8	159.4	46.36	119.4	5.3	50	1.29	256	6.62	120	1.355	182	4.707	7.1	82	8.66	2	0	1	78	0	0	3	0	1	1	1	0	3.9	1	1	1
29770	28	27	13	4.64	105	5.83	4.5	267.7	0.7	61.88	2	62	1	2	3.04	3056.96	97.73	70.1	159.7	27.49	97.3	5.7	67	1.73	254	6.57	133	1.502	160	4.138	1.3	35	3.71	2	0	1	89	1	0	2	0	1	1	1	0	15.9	2	1	1
38773	28	20	12	4.28	111	6.16	5.4	321.2	1.2	106.08	1	64	3	4	4.92	57327.5	67.53	109.2	161.9	41.66	134.6	5.5	43	1.11	231	5.97	246	2.777	139	3.595	25.4	88	28.86	1	0	1	86	1	0	3	1	1	1	2	0	25.3	3	1	1
46334	27	31	18	6.43	114	6.33	6.2	368.8	0.82	72.49	2	75	1	4	3.23	9634.11	74.55	67.7	149.5	30.29	105.4	6.1	59	1.53	201	5.2	285	3.218	85	2.198	22.1	115	19.22	2	0	1	85	1	1	3	1	1	1	2	0	24.8	3	1	1
65218	27	28	20	7.14	95	5.27	6.6	392.6	1.15	101.66	1	74	5	1	0.79	9748.58	66.78	56.6	162.5	21.4	93.9	6.1	47	1.22	164	4.24	110	1.242	95	2.457	5.7	100	5.7	2	1	1	81	1	0	1	0	1	1	2	0	30	3	1	1
24192	26	31	15	5.36	109	6.05	5.4	321.2	1.2	106.08	1	71	4	5	2.15	11477.3	64.65	79.7	173.4	26.51	98.1	5.6	58	1.5	218	5.64	165	1.863	127	3.284	225.5	66	341.67	2	1	1	69	1	0	2	1	3	3	2	1	30	3	0	1
17210	25	26	14	5	80	4.441	3.7	220.1	1	88.4	1	64	3	5	4.74	23366.3	84.05	89.2	175.9	28.83	105.4	5.4	36	0.93	199	5.15	503	5.68	115	2.97	8.5	122	6.97	1	0	1	86	0	0	2	1	1	1	2	0	30	3	1	0
32835	24	23	14	5	104	5.77	5.7	339	0.9	79.56	1	33	1	4	1.16	25437.2	115.65	95.6	173.1	31.91	106.2	6.3	42	1.09	184	4.76	131	1.479	116	3	6.8	92	7.39	2	0	1	44	1	1	3	0	1	1	1	0	3.3	1	1	1
58460	24	23	10	3.57	88	4.88	6	356.9	0.72	63.65	2	76	4	2	1.08	16441.8	86.6	87.3	161.2	33.6	108	6.2	47	1.22	199	5.15	98	1.106	132	3.414	2.1	47	4.47	1	0	1	71	1	0	3	0	1	1	2	0	24.8	3	1	0
48954	23	31	17	6.07	129	7.16	7.9	469.9	1.12	99.01	1	80	3	2	1.23	11478	66.41	77.3	166.9	27.75	107.4	7.8	35	0.91	203	5.25	442	4.99	115	2.97	113.5	147	77.21	1	0	1	43	0	1	2	1	2	2	2	1	30	3	1	0
51019	23	20	14	5	148	8.22	6.1	362.8	1.05	92.82	1	63	2	1	1.26	7817.36	79.76	70.1	162.4	26.58	97.2	6.1	32	0.83	217	5.61	207	2.337	144	3.724	73.4	148	49.59	1	0	1	69	1	1	2	1	2	2	2	1	30	3	0	0
23529	22	22	11	3.93	94	5.22	4.3	255.8	0.7	61.88	2	62	4	4	0.48	13757.4	97.73	92.6	159	36.63	121.2	5.6	86	2.22	299	7.73	49	0.553	203	5.25	6.5	126	5.16	2	1	1	74	1	0	3	0	1	1	1	0	18.51	2	1	1
32193	22	26	16	5.71	111	6.16	6.2	368.8	0.9	79.56	1	76	3	4	3.13	52851.2	88.51	79.5	175.7	25.75	101.5	4.9	67	1.73	159	4.11	63	0.711	79	2.043	258	147	175.51	2	1	1	61	1	0	2	0	2	2	2	1	30	3	0	1
55395	22	30	15	5.36	129	7.16	7.6	452	0.95	83.98	2	73	3	3	5	38596.5	63.26	74.3	154.2	31.25	86.4	7.5	76	1.97	167	4.32	86	0.971	74	1.914	7.8	141	5.53	1	1	1	46	0	1	3	0	1	1	2	0	15.9	2	0	1
2015	21	23	14	5	90	4.996	5.2	309.3	0.5	44.2	2	61	1	1	1.39	2105.86	106.64	59.8	159.2	23.59	83	4.9	48	1.23	206	5.33	262	2.96	106	2.74	3.8	96	3.96	1	0	1	92	0	0	1	1	1	1	1	0	13.7	2	0	0
2023	21	22	9	3.2	105	5.829	4.8	285.5	0.5	44.2	2	45	5	4	5	12907.8	117.8	126.2	166.9	45.31	131.9	6.2	46	1.18	119	3.08	92	1.04	55	1.42	15.5	152	10.2	2	0	1	91	1	0	3	0	1	1	1	0	6.3	1	1	0
58115	21	24	4	1.43	107	5.94	4.5	267.7	0.71	62.76	2	79	3	3	2.75	47108.7	86.44	77.4	169.6	26.91	99.7	6.3	63	1.63	230	5.95	117	1.321	144	3.724	13	118	11.02	1	0	1	15	1	0	2	0	1	1	2	0	15.9	2	1	1
31563	20	30	15	5.36	82	4.55	5.2	309.3	1.1	97.24	2	61	3	3	3.64	66182.6	57.17	114.2	167.9	40.51	120.4	4.9	65	1.68	160	4.14	107	1.208	74	1.914	5.4	69	7.83	1	0	1	74	0	0	3	0	1	2	3	1	13.7	2	1	1
4373	20	25	13	4.6	108	5.995	6	356.9	0.7	61.9	2	72	4	1	1.08	6503.33	91.83	96.4	163.8	35.93	109.3	6	36	0.93	176	4.55	119	1.34	115	2.97	8	178	4.49	1	0	1	76	1	0	3	0	1	1	1	0	24.8	3	1	0
14184	19	24	16	5.71	58	3.22	3.8	226	0.8	70.72	2	56	1	1	1.36	7566.81	86.42	62.1	162.5	23.52	83.9	5.4	65	1.68	215	5.56	71	0.8	136	3.52	3.1	65	4.77	1	0	1	85	0	0	1	0	1	1	2	0	7.3	1	0	1
1638	19	16	11	3.9	103	5.718	6.2	368.8	0.6	53	1	62	1	1	2.17	1383.02	109.15	79.2	161.8	30.25	102.6	5.4	41	1.05	159	4.11	154	1.74	88	2.28	50.5	181	27.9	2	0	1	90	0	0	3	1	1	1	1	0	21.6	3	1	1
37780	19	26	12	4.28	101	5.61	6.3	374.7	0.8	70.72	2	61	4	5	5	12128.4	83.78	78.1	169.5	27.18	82.6	5.8	52	1.34	165	4.27	68	0.768	99	2.56	19.2	90	21.33	2	0	1	74	1	0	2	0	1	1	2	0	13.7	2	0	1
45777	19	24	13	4.64	86	4.77	5.1	303.3	0.68	60.11	2	67	3	5	1.76	35079.6	95.4	63.1	160.2	24.59	85.5	4.8	89	2.3	222	5.74	116	1.31	110	2.845	3.9	57	6.84	2	0	1	93	0	0	1	0	1	1	1	0	11.7	2	0	1
49816	19	23	23	8.21	109	6.05	5.2	309.3	1.17	103.43	1	80	3	2	2.14	20184.9	63.02	80.1	171.5	27.23	97.7	5.5	64	1.66	210	5.43	116	1.31	123	3.181	51.5	120	42.92	2	0	1	92	1	0	2	0	2	2	2	1	29.4	3	0	1
57122	19	26	16	5.71	102	5.66	6.3	374.7	0.74	65.42	1	65	5	4	3.59	54601.4	100.55	49.5	159.1	19.56	80.3	5.6	39	1.01	210	5.43	199	2.247	131	3.388	9.2	39	23.59	2	0	1	73	1	0	1	1	1	1	1	0	30	3	0	0
64419	19	16	12	4.28	119	6.61	6.5	386.6	0.7	61.88	2	63	1	1	1.26	16352.9	97.12	105.5	153.2	45	125.9	6.8	52	1.34	205	5.3	162	1.829	121	3.129	2.3	49	4.69	1	1	1	60	1	1	3	1	1	1	1	0	24.8	3	1	1
8508	19	26	16	5.7	95	5.273	5.7	339	0.8	70.7	2	73	3	2	2.4	22328.5	77.75	86.64	166.3	31.33	109.4	5.8	43	1.11	204	5.28	242	2.73	113	2.92	4.2	95	4.42	2	0	1	75	1	0	3	1	1	1	2	0	27.5	3	1	0
10871	18	20	19	6.78	112	6.217	5.5	327.1	1.1	97.24	1	52	1	1	3.33	9095.77	80.77	67.9	169.7	23.58	84.3	5.4	69	1.78	252	6.52	100	1.13	163	4.22	21.7	301	7.21	2	0	1	88	1	0	1	0	1	1	2	0	11.2	2	0	1
23502	18	20	6	2.14	150	8.33	5.7	339	0.8	70.72	1	42	1	4	0.67	22106.9	113.32	75.1	171.4	25.56	93.4	6	40	1.03	180	4.65	152	1.716	110	2.845	61.7	177	34.86	2	0	1	87	1	1	2	1	2	2	1	0	15.6	2	0	1
25350	17	24	12	4.28	85	4.72	4.4	261.7	0.8	70.72	2	73	3	2	1.61	39743.9	77.75	61.7	160.4	23.98	89.6	5.3	99	2.56	230	5.95	82	0.926	115	2.974	4.1	86	4.77	1	0	1	60	0	0	1	0	1	1	2	0	13.7	2	1	1
35675	17	22	7	2.5	124	6.88	4	237.9	0.6	53.04	2	70	3	3	1.21	38216	96.5	75.3	159.7	29.52	106	6.7	48	1.24	193	4.99	225	2.54	100	2.586	26	65	40	1	0	1	59	1	1	2	1	2	2	1	0	15.9	2	1	0
39084	17	22	18	6.43	93	5.16	5.8	345	1.3	114.92	1	79	3	3	2.34	41236.4	55.88	95.6	173.7	31.69	117.2	5.8	48	1.24	153	3.96	106	1.197	84	2.172	102.8	191	53.82	2	0	1	71	1	0	3	0	2	3	3	1	30	3	1	1
14256	16	23	18	6.43	107	5.94	8.1	481.8	0.9	79.56	1	70	1	4	5	2439.92	91.88	78.7	172.4	26.48	103.4	5.4	44	1.14	197	5.09	111	1.25	131	3.39	72.2	120	60.17	1	0	1	63	1	0	2	0	2	2	1	0	30	3	1	1
31767	16	18	11	3.93	113	6.27	5.1	303.3	0.6	53.04	2	45	3	3	5	89845.5	112.73	100.2	159.4	39.44	122.3	5.4	38	0.98	307	7.94	288	3.252	211	5.456	14.3	124	11.53	2	0	1	83	1	0	3	1	1	1	1	0	18.51	2	1	0
35035	16	17	8	2.86	94	5.22	5.1	303.3	1.1	97.24	1	49	4	2	1.94	25858.4	82.29	77	176.8	24.63	88	5.8	52	1.34	201	5.2	105	1.185	128	3.31	16.3	149	10.94	1	0	1	96	1	0	1	0	1	1	2	0	13.3	2	0	1
35908	16	21	20	7.14	99	5.5	5.8	345	1.4	123.76	1	72	3	4	3.79	40704.5	53.4	86.1	170.4	29.65	111.1	5.2	52	1.34	188	4.86	100	1.129	116	3	10.5	93	11.29	2	0	1	83	1	0	2	0	1	2	3	1	30	3	1	1
48155	16	17	7	2.5	90	5	4.7	279.6	0.72	63.65	2	38	4	4	1.27	25233.8	109.69	122.5	156.8	49.82	118.5	4.8	46	1.19	167	4.32	95	1.073	102	2.638	29.5	167	17.66	1	0	1	85	0	0	3	0	1	1	1	0	4.5	1	1	0
542	15	15	15	5.4	96	5.329	4.9	291.5	0.5	44.2	2	40	1	2	2.4	4667.87	121.52	101.2	167.5	36.07	106.4	5.7	70	1.82	232	6	138	1.56	134	3.47	16.6	141	11.77	1	0	1	91	1	0	3	1	1	1	1	0	7.3	1	1	1
21625	14	18	6	2.14	90	5	3.6	214.1	1	88.4	1	50	3	2	1.28	38452.8	91.69	67.9	179.5	21.07	89	5.3	44	1.14	181	4.68	107	1.208	116	3	4.5	118	3.81	1	0	1	78	1	0	1	0	1	1	1	0	25.3	3	0	1
239	14	17	13	4.6	91	5.051	4.9	291.5	0.6	53	2	69	3	4	5	27664.7	97.1	76.7	164.6	28.31	93.1	5.3	76	1.96	199	5.15	153	1.73	93	2.4	13.5	122	11.07	2	1	1	78	0	0	2	1	1	1	1	0	15.9	2	1	1
41375	14	18	34	12.14	225	12.49	9.9	588.9	2.3	203.32	2	66	4	2	2.08	15152.3	22.87	122.9	162	46.83	137.6	7.4	56	1.45	194	5.02	244	2.755	89	2.302	557	124	449.19	2	0	1	53	0	1	3	1	3	4	5	1	15.9	2	1	1
56160	14	23	16	5.71	81	4.5	5.3	315.2	0.86	76.02	2	80	1	1	1.34	10352	68.25	68.1	156.1	27.95	97.9	5.8	72	1.86	240	6.21	111	1.253	146	3.776	80.9	134	60.37	1	0	1	73	1	0	2	0	2	2	2	1	24.8	3	1	1
8382	14	14	14	5	93	5.162	5.1	303.3	0.7	61.9	1	59	3	2	2.3	44215.5	106.14	79.5	179.3	24.73	102.5	5.2	42	1.09	217	5.61	150	1.69	145	3.75	9.9	119	8.32	1	0	1	99	0	0	1	1	1	1	1	0	30	3	1	1
10777	13	23	17	6.07	97	5.384	4.9	291.5	0.9	79.56	2	85	3	4	4.61	7194.75	62.65	45.9	155.3	19.03	80.1	5.2	64	1.66	194	5.02	71	0.8	116	3	32.5	81	40.12	1	1	1	54	1	0	1	0	2	2	2	1	13.7	2	0	1
58871	13	18	23	8.21	112	6.22	3.6	214.1	0.71	62.76	2	80	3	2	1.11	34155.1	85.9	58.1	148.3	26.42	102.2	6.6	50	1.29	190	4.91	170	1.919	106	2.741	19.4	101	19.21	1	0	1	45	1	1	2	1	1	1	2	0	27.5	3	1	1
63285	13	20	17	6.07	96	5.33	6.7	398.5	0.91	80.44	2	80	3	3	1.16	42992.5	63.78	65.8	158.5	26.2	95	5.5	54	1.4	197	5.09	97	1.095	124	3.207	34.2	100	34.2	2	0	1	67	0	0	2	0	2	2	2	1	30	3	1	1
19570	12	17	21	7.5	88	4.885	5.8	345	0.9	79.56	2	67	3	3	2.03	33352.9	70.07	78.2	168	27.71	101.7	5.2	64	1.66	226	5.84	237	2.68	115	2.97	3.3	51	6.47	2	1	1	62	0	0	2	1	1	1	2	0	18.51	2	1	1
59879	11	18	16	5.71	90	5	5	297.4	0.99	87.52	1	75	4	2	0.09	9747.92	79.44	54.1	166.3	19.56	74.6	6.1	77	1.99	219	5.66	53	0.598	131	3.388	26.7	196	13.62	2	0	1	84	1	0	1	0	1	1	2	0	30	3	0	1
51287	10	24	20	7.14	76	4.22	3.9	232	0.72	63.65	2	70	3	4	3.65	32369.9	89.89	70.4	155.4	29.15	98.8	5.3	52	1.34	224	5.79	141	1.592	144	3.724	9.4	141	6.67	1	0	1	61	0	0	2	1	1	1	2	1	15.9	2	1	1
9535	10	19	16	5.7	111	6.162	5.6	333.1	0.9	79.6	2	60	3	3	4.07	29385.4	73.19	72.2	151.4	31.5	98.3	5.3	72	1.85	370	9.57	168	1.9	265	6.85	0.9	16	5.63	2	0	1	67	1	0	3	1	1	1	2	0	13.7	2	1	1
458	9	17	38	13.6	88	4.885	10.5	624.5	1.3	114.9	2	76	3	1	2.4	22217.9	42.62	57.7	154.9	24.05	84.7	4.9	41	1.06	198	5.12	110	1.24	135	3.49	318.5	58	549.14	1	1	1	60	0	0	1	0	3	4	4	1	27.5	3	0	0
56869	8	17	22	7.85	66	3.66	9.9	588.9	1.54	136.14	1	80	3	2	1.17	14644.6	45.32	68.8	159.5	27.04	96.5	7.3	33	0.85	224	5.79	142	1.603	163	4.215	50.8	101	50.3	1	0	1	59	0	1	2	1	2	3	3	1	30	3	0	0
372	7	18	6	2.1	104	5.773	4.8	285.5	0.4	35.4	1	70	3	5	3.09	15773	117.38	46.5	161.6	17.81	77.2	5.5	80	2.07	210	5.43	89	1	112	2.9	31.4	89	35.28	2	0	1	76	1	0	1	0	2	2	1	0	30	3	0	1
35805	57	115	3	1.07	109	6.05	6.5	386.6	0.8	70.72	1	45	4	4	5	23310.4	111.22	119.1	181.1	36.31	118.6	4.3	62	1.6	270	6.98	318	3.59	144	3.724	108.5	311	34.89	2	0	1	101	1	0	3	1	2	2	1	0	21.6	3	1	1
51319	54	35	10	3.57	128	7.11	8.6	511.5	0.67	59.23	1	48	2	1	0.83	28108.1	115.17	86.4	163.2	32.44	106.2	6.2	58	1.5	231	5.97	111	1.253	151	3.905	35.9	258	13.91	2	0	1	80	1	1	3	0	1	1	1	0	25.3	3	1	1
21554	42	31	22	7.85	112	6.22	5.5	327.1	1.1	97.24	1	71	5	5	5	49068.2	71.77	63.6	176.9	20.32	86	5.7	45	1.16	136	3.52	119	1.344	67	1.733	3.5	62	5.65	1	1	1	75	1	0	1	0	1	1	2	0	30	3	0	1
2884	34	26	15	5.4	90	4.996	5.5	327.1	0.7	61.9	1	72	1	1	1.24	2051.77	97.9	90.34	174.3	29.74	110.5	5.3	53	1.36	188	4.86	133	1.5	109	2.82	8.9	97	9.18	1	0	1	77	0	0	2	0	1	1	1	0	30	3	1	1
19461	32	30	9	3.21	94	5.218	6.8	404.5	0.9	79.56	1	66	3	1	1.16	16674.7	94.19	109.2	177.2	34.78	119.6	5.4	34	0.88	187	4.84	192	2.17	115	2.97	9.9	80	12.38	2	0	1	101	0	0	3	1	1	1	1	0	30	3	1	0
39511	30	27	11	3.93	96	5.33	3.6	214.1	0.6	53.04	2	65	2	2	1.48	35320.3	99.55	50.2	146.4	23.42	85.6	5.5	42	1.09	198	5.12	102	1.152	136	3.517	2.1	22	9.55	2	1	1	89	1	0	1	0	1	1	1	0	24.8	3	0	0
32442	29	32	17	6.07	92	5.11	6.2	368.8	1	88.4	1	72	1	1	2.73	6434.4	79.97	64.3	164.6	23.73	91.7	5.2	91	2.35	242	6.26	55	0.621	140	3.62	18.2	42	43.33	2	0	1	56	0	0	1	0	2	2	2	1	30	3	0	1
44316	28	23	9	3.21	87	4.83	5	297.4	0.7	61.88	1	66	2	3	2.86	5811.14	101.62	93.4	165.6	34.06	115	5.5	62	1.6	261	6.75	83	0.937	182	4.707	16.9	167	10.12	2	0	1	71	0	0	3	0	1	1	1	0	30	3	1	1
34283	27	26	9	3.21	105	5.83	4	237.9	0.8	70.72	2	44	3	3	4.68	106827	93.12	63	163.7	23.51	89	4.7	75	1.94	191	4.94	113	1.276	93	2.405	13.5	221	6.11	2	0	1	92	1	0	1	0	1	1	1	0	6.3	1	1	1
8765	27	25	20	7.1	115	6.384	7.7	458	0.9	79.6	1	80	3	5	5	7098.8	86.34	65.9	170.2	22.75	89.3	5.3	44	1.13	202	5.22	107	1.21	137	3.54	14.1	76	18.55	2	0	1	82	1	0	1	0	1	1	2	0	30	3	0	1
1362	26	44	16	5.7	113	6.273	6.7	398.5	0.6	53	2	79	3	3	2.3	18133.2	91.25	64.6	149.5	28.9	96.2	6.5	34	0.89	198	5.12	238	2.69	115	2.97	40.3	356	11.32	1	0	1	70	1	1	2	1	1	1	1	0	24.8	3	1	0
16301	26	27	19	6.78	154	8.549	6.7	398.5	1	88.4	1	77	3	4	5	16966.8	77.52	77.7	168.2	27.46	91.5	6	39	1.01	111	2.87	55	0.62	61	1.58	95.6	76	125.79	2	1	1	58	1	1	2	0	2	2	2	1	30	3	0	0
58869	26	20	16	5.71	95	5.27	5.8	345	0.78	68.95	1	51	1	3	2.7	11619.8	107.97	66.2	160.2	25.79	95.7	5.2	37	0.96	142	3.67	220	2.484	61	1.577	109.5	89	123.03	1	0	1	105	0	0	2	1	2	2	1	0	15.6	2	0	0
55279	23	29	14	5	89	4.94	4.8	285.5	0.77	68.07	2	58	4	4	3.02	29285.9	89.36	70.9	152.2	30.61	91.2	5.5	102	2.64	287	7.42	49	0.553	175	4.526	3.1	53	5.85	2	0	1	85	0	0	3	0	1	1	2	0	18.51	2	1	1
37151	22	24	12	4.28	102	5.66	4.3	255.8	0.7	61.88	2	55	3	3	4.24	100793	102.07	59.9	158.2	23.93	84.8	5.7	52	1.34	140	3.62	89	1.005	70	1.81	118.1	17	694.71	2	0	1	83	1	0	1	0	3	3	1	0	15.9	2	0	1
40912	22	20	20	7.14	100	5.55	5.5	327.1	0.9	79.56	1	61	1	1	1.87	5903.31	97.17	78.5	173.6	26.05	94.2	5.7	63	1.63	191	4.94	55	0.621	117	3.026	6.2	130	4.77	2	0	1	74	1	0	2	0	1	1	1	1	25.3	3	0	1
17439	20	22	25	8.93	161	8.937	6	356.9	0.9	79.56	2	66	3	5	1.86	26410.2	70.51	111.4	165.3	40.77	109.2	5.8	56	1.45	190	4.91	105	1.19	113	2.92	8.7	128	6.8	2	0	1	79	1	1	3	0	1	1	2	0	24.8	3	1	1
26883	20	20	15	5.36	93	5.16	4.7	279.6	1.2	106.08	1	72	3	3	1.2	14225.8	64.25	71.9	164.1	26.7	98.1	5.8	62	1.6	230	5.95	192	2.168	130	3.362	8.3	92	9.02	2	0	1	70	1	1	2	1	1	1	2	0	30	3	0	1
6967	20	25	15	5.4	88	4.885	4	237.9	0.5	44.2	2	70	3	4	5	18888.4	100.84	50.9	158.2	20.34	83.5	5.3	78	2.02	195	5.04	140	1.58	89	2.3	12	48	25	2	0	1	77	0	0	1	1	1	1	1	0	24.8	3	0	1
27411	19	26	12	4.28	93	5.16	4.3	255.8	0.7	61.88	2	85	3	4	1.74	19499.5	84.7	55.3	155.4	22.9	96.7	5.5	79	2.04	243	6.28	105	1.185	143	3.698	4.7	14	33.57	1	0	1	76	0	0	1	0	2	2	2	1	27.5	3	1	1
3374	19	24	12	4.3	108	5.995	5.3	315.2	0.9	79.6	1	85	3	3	0.96	15259.7	83.7	65	183	19.41	89.3	5.1	70	1.8	178	4.6	79	0.89	93	2.4	19	99	19.19	1	0	1	87	1	0	1	0	1	1	2	0	30	3	0	1
45823	19	26	11	3.93	96	5.33	3.6	214.1	0.82	72.49	2	78	5	5	1.47	19054.3	73.17	59.9	146	28.1	95.8	6.2	73	1.89	215	5.56	191	2.156	104	2.689	18	103	17.48	1	0	1	61	1	0	2	1	1	1	2	0	21.5	3	1	1
23112	18	24	20	7.14	105	5.83	4.3	255.8	1	88.4	1	81	3	1	2.36	19194.1	75.61	68.9	162.4	26.12	101.6	5.6	54	1.4	209	5.4	87	0.982	138	3.569	8.5	102	8.33	1	0	1	57	1	0	2	0	1	1	2	0	30	3	0	1
28092	18	20	10	3.57	101	5.61	4.5	267.7	1	88.4	1	68	3	1	2.15	54308.4	81.98	72.9	173.1	24.33	96.6	5.3	45	1.16	252	6.52	112	1.264	185	4.784	77.4	333	23.24	1	0	1	89	1	0	1	0	1	1	2	0	30	3	0	1
2583	17	17	11	3.9	213	11.824	3.5	208.2	0.5	44.2	2	70	3	1	1.33	24860.7	100.84	76.8	154.9	32.01	112.5	8.1	39	1.02	223	5.77	309	3.49	115	2.97	3.2	116	2.76	1	0	1	71	0	1	3	1	1	1	1	0	21.5	3	1	0
40995	17	28	5	1.79	98	5.44	5.3	315.2	0.8	70.72	1	49	3	3	3.39	88700.2	108.49	75.4	174.5	24.76	96.2	4.9	101	2.61	167	4.32	35	0.395	59	1.526	5.1	49	10.41	2	0	1	80	1	0	1	0	1	1	1	0	13.3	2	0	1
45653	17	26	7	2.5	304	16.88	3.7	220.1	0.82	72.49	2	46	4	4	0.82	28558.8	89.28	100	172.6	33.57	107.8	9.1	78	2.02	183	4.73	116	1.31	82	2.121	40	218	18.35	1	0	1	80	0	1	3	0	1	1	2	0	4.5	1	1	1
39048	16	22	15	5.36	96	5.33	5.8	345	0.8	70.72	1	64	1	3	0.94	3251.36	98.83	70.6	169.7	24.52	92.2	5.8	57	1.47	207	5.35	85	0.96	133	3.439	2.4	54	4.44	2	0	1	73	1	0	1	0	1	1	1	0	25.3	3	0	1
38958	15	18	21	7.5	141	7.83	5.8	345	1.2	106.08	2	69	4	4	3.88	15238.4	49	151.9	166	55.12	133.5	7.3	69	1.78	115	2.97	60	0.677	34	0.879	86.2	92	93.7	1	0	1	60	0	1	3	0	2	3	3	1	18.51	2	1	1
42329	15	22	16	5.71	92	5.11	4.3	255.8	0.86	76.02	1	80	3	3	0.96	12852.3	87.53	71.1	176.7	22.77	97.5	5.7	42	1.09	166	4.29	83	0.937	107	2.767	39.9	152	26.25	1	0	1	63	1	0	1	0	1	1	2	0	30	3	0	1
42672	15	24	16	5.71	92	5.11	4.4	261.7	0.92	81.33	2	64	4	2	1.45	9742.31	69.53	63.8	169.7	22.15	88.5	5.7	66	1.71	194	5.02	37	0.418	121	3.129	4.5	30	15	2	0	1	74	1	0	1	0	1	1	2	0	13.7	2	1	1
61405	15	21	8	2.86	91	5.05	4.4	261.7	0.6	53.04	2	63	1	1	1.3	6878.79	100.8	67.5	149.9	30.04	102.4	5.4	49	1.27	166	4.29	109	1.231	95	2.457	4.3	55	7.82	1	0	1	78	0	0	3	0	1	1	1	0	11.7	2	1	0
35284	14	26	20	7.14	88	4.88	4.4	261.7	0.9	79.56	1	54	4	1	1	32380.3	101.49	61.8	170.3	21.31	74.8	5.8	71	1.84	237	6.13	41	0.463	158	4.086	6.8	162	4.2	1	0	1	90	1	0	1	0	1	1	1	0	9.4	1	0	1
27032	13	16	12	4.28	101	5.61	5.3	315.2	0.9	79.56	1	63	4	3	1.48	12922.3	95.97	86.7	171.4	29.51	100.2	5	38	0.98	199	5.15	108	1.219	139	3.595	20.7	218	9.5	1	0	1	74	0	0	2	0	1	1	1	0	30	3	0	0
64036	13	22	23	8.21	108	6	7.8	463.9	1.27	112.27	1	69	3	4	1.93	28953.8	61.16	91	173.4	30.3	120.1	7.4	49	1.27	153	3.96	142	1.603	76	1.965	50	80	62.5	1	0	1	67	1	1	3	1	2	2	2	1	30	3	1	1
15771	12	18	18	6.43	84	4.663	5.9	350.9	1	88.4	2	85	1	1	0.72	2987.74	55.21	56.2	141	28.27	95.5	5.9	47	1.22	282	7.29	324	3.66	170	4.4	10.3	87	11.84	1	0	1	49	1	0	2	1	1	2	3	1	27.5	3	1	0
45468	12	23	12	4.28	96	5.33	5.9	350.9	1.22	107.85	1	80	3	3	1.75	26630	59.93	61.8	167.4	22.05	87.5	5	68	1.76	179	4.63	126	1.423	86	2.224	8.4	96	8.75	2	0	1	48	1	0	1	0	1	2	3	1	30	3	0	1
47859	12	27	7	2.5	92	5.11	5.6	333.1	0.72	63.65	1	47	3	2	0.88	28803.8	113.4	43.2	166.1	15.66	70	5.3	69	1.78	195	5.04	69	0.779	112	2.896	6.8	87	7.82	2	0	1	55	1	0	1	0	1	1	1	0	13.3	2	0	1
63859	112	77	15	5.36	84	4.66	7.3	434.2	1.19	105.2	1	55	4	3	0.44	17648.8	72.14	102.6	174.9	33.5	115	5.3	48	1.24	161	4.16	110	1.242	91	2.353	7.6	161	4.72	2	0	1	95	0	0	3	0	1	1	2	0	29.4	3	1	1
54613	61	49	3	1.07	94	5.22	5.3	315.2	0.71	62.76	1	54	3	3	2.31	17328.5	109.03	90.8	175	29.65	106	4.9	97	2.51	293	7.58	122	1.377	172	4.448	7.1	49	14.49	2	0	1	81	0	0	2	0	1	1	1	0	18.4	2	1	1
32868	55	49	8	2.86	111	6.16	4.4	261.7	0.7	61.88	2	41	5	3	0	34541.5	111.36	121.8	169	42.65	132.6	5	83	2.15	249	6.44	71	0.802	152	3.931	15.5	184	8.42	2	0	1	84	1	0	3	0	1	1	1	0	6.3	1	1	1
26580	53	49	11	3.93	94	5.22	7.1	422.3	1.1	97.24	1	25	5	3	3.27	72062.9	95.54	113.8	183.1	33.94	106.9	5.3	39	1.01	196	5.07	101	1.14	137	3.543	173.5	226	76.77	2	0	1	85	0	0	3	0	2	2	1	0	6.7	1	1	0
34769	53	51	13	4.64	176	9.77	4.2	249.8	0.8	70.72	2	70	3	5	4.1	55138.8	79.22	75.8	167.7	26.95	104	7.5	63	1.63	154	3.98	75	0.847	76	1.965	10.4	69	15.07	1	0	1	58	0	1	2	0	1	1	2	0	11.7	2	1	1
34849	51	138	17	6.07	106	5.88	9.7	577	1.1	97.24	2	71	4	2	1.47	19373.1	53.72	83.3	165.9	30.27	95.4	4.7	188	4.86	247	6.39	70	0.79	45	1.164	44.6	409	10.9	2	0	1	0	1	0	3	0	1	2	3	1	27.5	3	1	1
44210	45	32	20	7.14	94	5.22	6.8	404.5	1.42	125.53	1	71	3	5	2.92	9471.57	52.83	95.4	181.7	28.9	112	5.8	48	1.24	205	5.3	73	0.824	142	3.672	49.9	114	43.77	1	0	1	79	1	0	2	0	2	3	3	1	30	3	1	1
42825	40	32	17	6.07	108	6	6.2	368.8	0.83	73.37	1	61	3	3	2.71	48720.6	99.57	79.9	168.9	28.01	93.6	5.8	32	0.83	236	6.1	646	7.293	115	2.97	21	241	8.71	2	0	1	65	1	0	2	1	1	1	1	0	30	3	0	0
49035	40	33	12	4.28	89	4.94	5	297.4	0.62	54.81	2	60	3	5	5	66189.4	101.89	101.4	166.3	36.67	112.9	5.8	40	1.03	176	4.55	120	1.355	112	2.896	4.9	60	8.17	2	0	1	78	1	0	3	0	1	1	1	0	15.9	2	1	0
51197	40	47	13	4.64	148	8.22	6.2	368.8	1.04	91.94	1	58	1	5	5	13072.6	83.23	83	176.8	26.55	100.2	6.8	88	2.28	187	4.84	127	1.434	74	1.914	82	58	141.38	2	0	1	88	0	1	2	0	2	2	2	1	15.6	2	0	1
33154	35	26	12	4.28	164	9.1	9.5	565.1	0.7	61.88	1	46	1	3	1.37	22079.3	115.08	110.3	164.2	40.91	124.7	6.2	51	1.32	268	6.93	250	2.823	167	4.319	286.5	115	249.13	2	0	1	73	1	1	3	1	2	2	1	0	21.6	3	1	1
53730	35	27	10	3.57	120	6.66	6.2	368.8	0.64	56.58	2	54	2	3	1.69	11014.1	104.95	148	159.7	58.03	144.9	6	56	1.45	202	5.22	105	1.185	125	3.233	9.4	72	13.06	1	1	1	67	1	0	3	0	1	1	1	0	15.9	2	1	1
27335	33	28	14	5	115	6.38	8.7	517.5	1.1	97.24	1	77	1	1	1.65	3238.03	69.14	70.4	162.1	26.79	104	6.1	40	1.03	196	5.07	154	1.739	125	3.233	8.4	96	8.75	2	0	1	79	1	0	2	1	1	1	2	0	30	3	1	1
32908	33	27	17	6.07	103	5.72	5	297.4	0.8	70.72	2	62	4	3	0.93	12124.7	83.26	79.5	162	30.29	101.1	6.2	50	1.29	215	5.56	100	1.129	145	3.75	16.7	175	9.54	1	0	1	85	1	0	3	0	1	1	2	0	15.9	2	1	1
5278	33	31	23	8.2	99	5.495	5.2	309.3	0.8	70.7	1	65	1	1	1.24	2297.89	98.21	76.6	171.1	26.17	105	5.5	36	0.94	212	5.48	255	2.88	125	3.23	5.3	166	3.19	1	0	1	70	1	0	2	1	1	1	1	0	30	3	1	0
61204	33	39	13	4.64	122	6.77	6.3	374.7	0.96	84.86	1	80	3	1	2.06	21842.2	79.9	59.8	175	19.53	83.4	6.8	52	1.34	137	3.54	84	0.948	68	1.758	87.5	63	138.89	1	1	1	91	0	1	1	0	2	2	2	1	30	3	0	1
62085	32	27	12	4.28	101	5.61	5.6	333.1	1.06	93.7	1	54	4	4	4.92	17672.9	83.4	99.5	189.2	27.8	100.7	5.3	38	0.98	191	4.94	141	1.592	125	3.233	7	192	3.65	2	0	1	77	1	0	2	1	1	1	2	0	13.3	2	0	0
49106	31	28	16	5.71	118	6.55	8.3	493.7	0.78	68.95	2	65	3	4	1.25	27908.5	84.24	94.3	160.4	36.65	122.9	6.6	56	1.45	172	4.45	234	2.642	69	1.784	12.6	163	7.73	2	0	1	73	1	1	3	1	1	1	2	0	13.7	2	1	1
50537	29	32	19	6.78	115	6.38	5.4	321.2	1.32	116.69	1	80	2	5	1.23	14761.4	54.53	65.7	162.3	24.94	97.1	6.4	57	1.47	172	4.45	108	1.219	93	2.405	7.7	109	7.06	2	1	1	59	1	0	1	0	1	2	3	1	30	3	0	1
19871	28	20	11	3.93	127	7.05	5.8	345	0.8	70.72	1	63	3	1	1.29	12862.8	99.44	69.6	159.3	27.43	93.5	6.1	45	1.16	258	6.67	186	2.1	176	4.55	23.2	105	22.1	2	1	1	89	1	1	2	1	1	1	1	0	30	3	0	1
29363	28	36	9	3.21	115	6.38	3.8	226	0.7	61.88	2	75	1	1	1.22	4289.96	90.13	68.8	158.5	27.39	93.4	6.2	52	1.34	184	4.76	94	1.061	113	2.922	7	85	8.24	2	0	1	71	1	0	2	0	1	1	1	0	11.7	2	1	1
59673	28	26	12	4.28	120	6.66	5	297.4	0.96	84.86	1	80	3	4	2.2	20404.7	79.9	95.7	165.8	34.81	118.7	5.2	62	1.6	147	3.8	73	0.824	70	1.81	7.3	175	4.17	2	1	1	53	1	0	3	0	1	1	2	0	30	3	1	1
11102	27	36	21	7.5	90	4.996	7.3	434.2	0.9	79.56	2	49	4	3	1.92	20580.6	78.37	86.8	171.6	29.48	98.7	5.7	72	1.86	226	5.84	85	0.96	137	3.54	106.5	199	53.52	2	0	1	97	1	0	2	0	2	2	2	1	10	2	1	1
15129	26	26	16	5.71	102	5.662	4.1	243.9	0.8	70.72	1	71	3	1	1.26	5158.11	94.62	75.8	167.8	26.92	102.1	5.1	45	1.16	123	3.18	69	0.78	64	1.66	13.2	135	9.78	1	1	1	61	1	1	2	0	1	1	1	0	30	3	1	1
20432	26	27	14	5	84	4.663	4.6	273.6	0.8	70.72	2	54	3	4	5	31694.7	87.5	47.9	156.7	19.51	69.8	5.1	69	1.78	253	6.54	64	0.72	171	4.42	9.8	136	7.21	2	0	1	79	0	0	1	0	1	1	2	0	10	2	0	1
41492	26	22	13	4.64	96	5.33	5.2	309.3	0.82	72.49	1	72	3	1	1.02	7782.35	93.33	82.6	168.7	29.02	106.2	5.3	76	1.97	202	5.22	61	0.689	114	2.948	3.1	49	6.33	2	0	1	90	1	0	2	0	1	1	1	0	25.3	3	1	1
64473	26	32	18	6.43	107	5.94	8	475.8	1.17	103.43	1	79	4	3	2.04	11869.8	63.41	82.3	165.6	30	100	6.5	57	1.47	166	4.29	67	0.756	96	2.483	10.2	229	4.45	1	1	1	60	1	1	3	0	1	1	2	0	30	3	0	1
9979	26	29	18	6.43	94	5.218	4.4	261.7	0.9	79.56	1	60	5	4	2.51	32749.2	97.78	57.3	160.2	22.33	83.1	6.1	51	1.32	180	4.65	361	4.08	57	1.47	7.2	119	6.05	2	0	1	86	1	0	1	1	1	1	1	0	30	3	0	1
60124	25	23	13	4.64	285	15.82	6	356.9	1.37	121.11	1	54	4	5	3.32	20565.7	61.3	96.5	189.8	26.79	101.1	11.8	54	1.4	214	5.53	100	1.129	140	3.62	1245	130	957.69	2	0	1	89	0	1	2	0	3	3	2	1	11.2	2	0	1
7295	25	25	15	5.4	98	5.44	4.9	291.5	0.7	61.9	1	68	1	1	1.49	1299.45	100.36	76.34	173.2	25.45	103.9	5.7	34	0.89	239	6.18	132	1.49	178	4.6	6.4	118	5.42	2	1	1	71	1	0	2	0	1	1	1	0	30	3	1	0
9267	25	25	14	5	107	5.94	8	475.8	0.6	53	1	62	1	4	4	2004.9	109.15	116	173.4	38.58	127.9	5.5	60	1.54	228	5.9	116	1.31	145	3.75	5	71	7.04	2	0	1	87	1	0	3	0	1	1	1	0	30	3	1	1
18804	24	24	15	5.36	123	6.828	6	356.9	0.8	70.72	1	76	1	4	1.96	2349.84	91.72	91.2	164.2	33.83	115.8	6.3	42	1.09	174	4.5	138	1.56	104	2.69	5.1	94	5.43	1	0	1	67	1	1	3	1	1	1	1	0	30	3	1	1
24823	24	25	19	6.78	115	6.38	6.1	362.8	1.2	106.08	1	85	3	3	4.13	23291.7	59.26	72	183.8	21.31	88.7	5.5	55	1.42	195	5.04	95	1.073	121	3.129	34.3	256	13.4	1	0	1	0	1	0	1	0	1	2	3	1	29.4	3	0	1
16329	23	26	12	4.28	79	4.385	6.4	380.7	0.8	70.72	2	53	3	3	3.27	28664.2	88.05	92.5	166.4	33.41	111.7	5.3	37	0.96	210	5.43	122	1.38	149	3.85	19.9	77	25.84	1	0	1	81	0	0	3	0	1	1	2	0	21.5	3	1	0
19698	23	18	13	4.64	95	5.273	5.4	321.2	0.9	79.56	1	62	3	5	3.49	16149.6	96.57	89.4	168.7	31.41	106.2	5.6	60	1.55	214	5.53	119	1.34	130	3.36	7.9	161	4.91	1	0	1	91	0	0	3	0	1	1	1	0	18.4	2	1	1
28816	23	26	7	2.5	81	4.5	4.6	273.6	0.7	61.88	2	68	1	1	1.34	3916	94.15	63.7	155.8	26.24	89.6	5.4	76	1.97	163	4.22	109	1.231	65	1.681	1.9	23	8.26	1	0	1	79	0	0	2	0	1	1	1	0	7.3	1	1	1
30101	23	25	14	5	89	4.94	4.7	279.6	1	88.4	2	80	3	4	1.52	15578	56.95	62.5	156.2	25.62	92.1	5.3	75	1.94	222	5.74	106	1.197	126	3.258	8.5	134	6.34	2	0	1	81	0	0	2	0	1	2	3	1	18.51	2	1	1
17942	22	17	14	5	91	5.051	4.8	285.5	0.9	79.56	1	62	1	2	1.93	1377.93	96.57	83.9	174.5	27.55	102.7	4.9	58	1.5	199	5.15	54	0.61	130	3.36	42.6	110	38.73	2	0	1	87	0	0	2	0	2	2	1	0	29.4	3	1	1
20673	22	23	12	4.28	87	4.829	5.2	309.3	0.9	79.56	2	70	4	5	5	8046.82	68.77	87.8	176	28.34	101.2	5.7	59	1.53	275	7.11	213	2.4	173	4.47	9.3	64	14.53	2	0	1	89	1	0	2	1	1	1	2	0	21.5	3	1	1
62045	22	21	19	6.78	98	5.44	4.6	273.6	0.99	87.52	2	75	3	3	5	41410.6	59.46	60.3	167.5	21.49	88.8	5.3	44	1.14	184	4.76	194	2.19	101	2.612	5.6	68	8.24	2	0	1	82	1	0	1	1	1	2	3	1	24.8	3	1	0
8100	22	18	12	4.3	87	4.829	4.6	273.6	0.7	61.9	2	65	2	1	1.37	15106.6	95.92	57.9	157.7	23.28	88	5.4	41	1.06	176	4.55	161	1.82	103	2.66	3.6	49	7.35	1	0	1	70	0	0	1	1	1	1	1	0	18.51	2	1	0
59480	21	26	7	2.5	97	5.38	4.7	279.6	0.66	58.34	2	67	1	2	1.23	4997.01	96.09	65.2	155.9	26.83	91	5.9	85	2.2	172	4.45	87	0.982	70	1.81	4.2	58	7.24	1	0	1	67	1	1	2	0	1	1	1	0	11.7	2	1	1
62941	21	33	8	2.86	78	4.33	5.5	327.1	0.75	66.3	2	55	4	4	1.16	13728.3	93.96	51.6	159.3	20.3	76.1	5.2	119	3.08	212	5.48	46	0.519	84	2.172	64.6	282	22.91	2	0	1	95	0	0	1	0	1	1	1	0	10	2	0	1
7764	21	27	21	7.5	85	4.718	4.3	255.8	0.5	44.2	2	78	3	3	2.26	20137.2	95.94	56.3	158.1	22.52	68.3	5.1	70	1.8	192	4.97	94	1.06	104	2.69	3.2	165	1.94	2	0	1	53	0	0	1	0	1	1	1	0	10	2	0	1
27942	20	20	15	5.36	77	4.27	4.2	249.8	0.9	79.56	2	82	3	4	5	22160.3	63.83	58.9	147	27.26	98.4	5.3	53	1.37	250	6.47	174	1.964	162	4.189	4.5	69	6.52	1	0	1	74	0	0	2	1	1	1	2	0	15.9	2	1	1
33743	20	21	19	6.78	85	4.72	5.9	350.9	1.2	106.08	1	26	4	3	1.24	19979.4	85.53	103.8	196.2	26.96	93	5.3	62	1.6	185	4.78	62	0.7	111	2.87	52.8	360	14.67	2	0	1	96	0	0	2	0	1	1	2	0	2.3	1	0	1
45282	20	24	11	3.93	106	5.88	5.8	345	0.82	72.49	1	74	3	3	3.43	8384.65	92.18	87.4	170.5	30.07	107	5.9	40	1.03	131	3.39	81	0.914	75	1.94	234.5	177	132.49	2	0	1	53	1	0	3	0	2	2	1	0	30	3	1	1
57729	20	26	14	5	103	5.72	7.2	428.3	1.04	91.94	2	58	3	4	0.85	19143.9	62.3	130.6	168	46.27	140.3	5.8	38	0.98	227	5.87	256	2.89	138	3.569	2.1	86	2.44	1	0	1	54	1	0	3	1	1	1	2	0	10	2	1	0
7499	20	28	12	4.3	103	5.718	4.1	243.9	0.5	44.2	2	60	2	9	0.78	15106.6	107.31	56.1	158.8	22.25	85.7	5.5	39	1	253	6.54	179	2.02	178	4.6	13.3	157	8.47	1	0	1	81	1	0	1	1	1	1	1	0	13.7	2	0	0
9925	20	21	10	3.6	124	6.883	3	178.4	0.4	35.4	1	77	1	1	1.88	1992.08	112.38	93.6	166.6	33.72	121.7	7	42	1.08	228	5.9	186	2.1	149	3.85	5.7	60	9.5	2	0	1	77	0	1	3	1	1	1	1	0	30	3	1	1
999	20	23	13	4.6	100	5.551	6.1	362.8	0.9	79.6	1	64	2	1	1.48	12147.7	95.37	84.2	170.5	28.96	106.2	6.1	39	1	295	7.63	300	3.39	115	2.97	91.9	98	93.78	2	1	1	91	1	1	2	1	2	2	1	0	30	3	1	0
11354	19	37	13	4.64	89	4.94	5.7	339	1.3	114.92	2	41	4	2	1.69	11770.3	52.98	56.2	163.9	20.92	72.6	5.2	92	2.38	219	5.66	55	0.62	116	3	36.9	111	33.24	2	0	1	85	0	0	1	0	2	3	3	1	3.3	1	0	1
17577	19	21	15	5.36	87	4.829	5.6	333.1	1	88.4	1	46	4	4	1.72	11710.9	94	79.7	178.9	24.9	85.8	5.5	97	2.51	216	5.59	63	0.71	106	2.74	4.3	191	2.25	2	0	1	88	0	0	1	0	1	1	1	0	15.6	2	0	1
38640	19	24	6	2.14	91	5.05	3.6	214.1	0.8	70.72	2	61	3	2	1.65	74588.9	83.78	45.6	156.3	18.67	72	5.2	64	1.66	188	4.86	146	1.648	95	2.457	3	39	7.69	1	0	1	67	0	0	1	1	1	1	2	0	15.9	2	0	1
48278	19	25	13	4.64	88	4.88	7.8	463.9	1.08	95.47	1	74	4	4	2.36	9369.94	72.01	86.6	174.8	28.34	98.3	5.9	54	1.4	276	7.14	170	1.919	188	4.862	5.1	155	3.29	1	0	1	59	1	0	2	1	1	1	2	0	30	3	0	1
38432	18	25	14	5	93	5.16	5.7	339	1	88.4	2	69	4	3	2.27	15156.7	60.98	80	170.1	27.65	96.3	5.5	59	1.53	250	6.47	113	1.276	168	4.344	17.6	146	12.05	1	0	1	76	0	0	2	0	1	1	2	0	18.51	2	1	1
58454	18	20	23	8.21	114	6.33	7.2	428.3	1.12	99.01	2	68	2	4	1.94	6435.09	53.56	71	159.7	27.84	93.5	6.2	64	1.66	166	4.29	140	1.581	74	1.914	722.5	160	451.56	1	0	1	67	1	1	2	1	3	4	3	1	11.7	2	1	1
58847	18	22	17	6.07	88	4.88	3.4	202.2	0.92	81.33	2	70	3	5	5	41461.7	66.98	61.3	158.9	24.28	86	5.5	57	1.47	155	4.01	66	0.745	85	2.198	16.2	98	16.53	2	0	1	65	0	0	1	0	1	1	2	0	21.5	3	0	1
2528	17	26	12	4.3	96	5.329	7	416.4	1	88.4	1	82	3	3	1.85	9825.26	75.14	108.2	176.3	34.81	127	4.8	57	1.47	210	5.43	71	0.8	139	3.59	163	468	34.83	2	0	1	77	0	0	3	0	2	2	2	1	30	3	1	1
34514	17	23	12	4.28	92	5.11	4.9	291.5	1	88.4	1	63	3	5	1.17	36492.5	84.57	83.1	171.7	28.19	104.2	5.4	56	1.45	188	4.86	102	1.152	112	2.896	32.2	120	26.83	2	1	1	66	0	0	2	0	1	1	2	0	29.4	3	1	1
58392	17	21	31	11.07	102	5.66	6.3	374.7	1.14	100.78	2	80	3	3	1.85	32202.9	48.67	74	161.2	28.48	99.7	5.5	60	1.55	217	5.61	145	1.637	128	3.31	7.3	83	8.8	1	0	1	63	1	0	2	1	1	2	3	1	21.5	3	1	1
64059	17	22	12	4.28	95	5.27	4.9	291.5	0.8	70.72	2	68	4	3	0.22	12886.4	80.21	65.7	172.3	22.1	90.2	6.2	54	1.4	239	6.18	152	1.716	155	4.008	3.9	86	4.53	2	1	1	80	1	0	1	1	1	1	2	0	15.9	2	1	1
16247	16	21	16	5.71	94	5.218	4.6	273.6	0.7	61.88	2	84	1	1	1.32	2987.74	85.23	67	154.3	28.14	99.2	5.8	56	1.45	230	5.95	131	1.48	148	3.83	21.7	115	18.87	1	0	1	51	1	0	2	0	1	1	2	0	13.7	2	1	1
2068	16	16	17	6.1	98	5.44	5.4	321.2	0.7	61.9	2	68	3	3	3.95	23684.4	94.15	68.2	160.1	26.61	93.7	5.9	68	1.76	247	6.39	334	3.77	112	2.9	5.3	55	9.64	2	0	1	72	1	0	2	1	1	1	1	0	15.9	2	1	1
6972	16	23	13	4.6	83	4.607	3.7	220.1	0.5	44.2	2	63	3	4	5	27664.7	105.32	46.9	150.5	20.71	67.8	5	77	2	218	5.64	87	0.98	123	3.18	12.5	135	9.26	2	0	1	64	0	0	1	0	1	1	1	0	7.3	1	0	1
11869	15	31	15	5.36	106	5.884	5.1	303.3	1.2	106.08	2	83	3	5	2.44	9324.19	44.91	73.8	172.9	24.69	95.3	5.5	42	1.09	216	5.59	244	2.75	125	3.23	133.5	90	148.33	2	1	1	57	1	0	1	1	2	4	4	1	27.5	3	1	0
2673	15	24	15	5.4	96	5.329	5	297.4	0.7	61.9	2	67	3	3	1.96	23684.4	94.73	78	154.5	32.68	111	5.3	84	2.17	232	6	111	1.25	126	3.26	6.4	117	5.47	2	0	1	86	1	0	3	0	1	1	1	0	7.3	1	1	1
30310	15	19	6	2.14	99	5.5	2.8	166.5	0.6	53.04	2	85	3	4	2.23	19499.5	87.91	62.2	156.2	25.49	95.6	5	65	1.68	195	5.04	156	1.761	99	2.56	40.2	116	34.66	1	0	1	61	0	0	2	1	2	2	2	1	10	2	1	1
49879	15	23	14	5	116	6.44	6.2	368.8	0.76	67.18	1	58	3	4	1.29	22038.6	104.19	103.3	177.4	32.82	118.2	6.3	38	0.98	131	3.39	139	1.569	65	1.681	11.5	152	7.57	2	0	1	59	1	1	3	1	1	1	1	0	30	3	1	0
51861	15	22	16	5.71	142	7.88	7.8	463.9	0.88	77.79	1	80	3	3	4.94	20593.7	86.93	82.8	168	29.34	103.6	6.7	72	1.86	158	4.09	125	1.411	61	1.577	25.5	105	24.29	2	1	1	75	0	1	2	0	1	1	2	0	29.4	3	1	1
11189	14	17	12	4.28	91	5.051	3.4	202.2	0.9	79.56	2	75	3	2	1.24	19307.4	66.67	66.1	155.1	27.48	97.7	6	60	1.55	256	6.62	214	2.42	153	3.96	8	143	5.59	1	0	1	51	1	1	2	1	1	1	2	0	24.8	3	1	1
64343	14	21	12	4.28	93	5.16	5	297.4	0.68	60.11	1	63	3	1	4.2	84821.2	104.45	94.2	170.4	32.4	108	6.8	45	1.16	160	4.14	174	1.964	80	2.069	4.3	84	5.12	1	0	1	77	0	1	3	1	1	1	1	0	30	3	1	1
14852	13	16	18	6.43	100	5.551	6.9	410.4	1	88.4	2	67	2	3	0.34	26410.2	61.75	51	160.8	19.72	77.3	5.8	47	1.22	212	5.48	196	2.21	126	3.26	710	105	676.19	1	0	1	73	1	1	1	1	3	3	2	1	18.51	2	0	0
29019	13	23	12	4.28	87	4.83	5	297.4	0.7	61.88	2	79	3	1	1.07	37223.6	87.92	80.8	160	31.56	104.1	5.5	60	1.55	258	6.67	115	1.298	175	4.526	9.3	54	17.22	1	0	1	72	0	0	3	0	1	1	2	0	15.9	2	1	1
44804	13	20	23	8.21	114	6.33	6.8	404.5	1.21	106.96	2	80	3	3	2.31	31175	45.31	58.2	163.1	21.88	84.2	5.9	34	0.88	101	2.61	139	1.569	39	1.009	24.2	33	73.33	2	1	1	45	1	0	1	1	2	3	3	1	24.8	3	0	0
24330	11	19	17	6.07	96	5.33	5.8	345	1.2	106.08	1	72	1	1	1.82	3238.03	64.25	76.6	170.5	26.35	106	5.7	33	0.85	164	4.24	71	0.802	117	3.026	36.7	122	30.08	1	0	1	49	1	0	2	0	2	2	2	1	30	3	1	0
34615	11	22	15	5.36	78	4.33	3.1	184.4	0.9	79.56	2	54	4	5	5	19017.6	75.97	70.2	163.2	26.36	88	5.7	70	1.81	158	4.09	31	0.35	82	2.121	6.6	125	5.28	1	0	1	74	1	0	2	0	1	1	2	0	6.3	1	1	1
51411	9	22	15	5.36	109	6.05	6.3	374.7	0.92	81.33	2	80	3	3	1.67	28968.6	62.94	74.4	154.2	31.29	111.7	6.1	41	1.06	179	4.63	172	1.942	104	2.689	5.1	40	12.75	2	0	1	49	1	0	3	1	1	1	2	0	24.8	3	1	0
897	65	38	13	4.6	98	5.44	6	356.9	0.6	53	2	54	1	1	2.17	6031.36	106.6	82.9	156.9	33.68	104.4	5.7	56	1.44	285	7.37	187	2.11	192	4.97	27.8	107	25.98	1	0	1	79	1	0	3	1	1	1	1	0	7.3	1	1	1
56288	63	29	12	4.28	132	7.33	6.8	404.5	0.88	77.79	1	43	1	1	1.19	18468.3	109.42	109.7	173.2	36.57	120.5	6.3	31	0.8	154	3.98	212	2.393	81	2.095	14.9	196	7.6	2	0	1	94	1	1	3	1	1	1	1	0	15.6	2	1	0
40263	62	34	13	4.64	115	6.38	8.2	487.7	1.2	106.08	1	41	4	5	1.84	20669.4	77.91	96.4	169.5	33.55	110.4	6.7	50	1.29	295	7.63	244	2.755	196	5.069	94.1	225	41.82	2	0	1	110	1	1	3	1	2	2	2	1	11.2	2	1	1
22507	51	39	16	5.71	94	5.22	5.8	345	1	88.4	1	63	3	3	3.92	46417.1	84.57	96.2	170.2	33.21	111.8	5.6	52	1.34	188	4.86	142	1.603	108	2.793	16.4	272	6.03	1	0	1	83	0	0	3	1	1	1	2	0	30	3	1	1
37271	50	35	8	2.86	80	4.44	5.9	350.9	1	88.4	1	37	3	5	4.22	74815.2	99.41	103	179.4	32	112	4.7	47	1.22	282	7.29	475	5.363	115	2.97	5.4	89	6.07	2	0	1	76	0	0	3	1	1	1	1	0	13.3	2	1	1
6341	37	40	8	2.9	103	5.718	7.1	422.3	0.7	61.9	1	54	1	1	1.51	7355.62	109.5	79.5	173.4	26.44	91.1	5.3	38	0.98	287	7.42	607	6.85	115	2.97	27	64	42.19	2	0	1	87	1	0	2	1	2	2	1	0	30	3	0	0
10926	36	33	14	5	90	4.996	5.4	321.2	1	88.4	2	73	3	3	4.36	22001.1	59.49	85.2	160.7	32.99	118.3	5.2	61	1.58	231	5.97	175	1.98	135	3.49	4.2	97	4.33	2	0	1	64	1	0	3	1	1	2	3	1	11.7	2	1	1
49563	35	24	11	3.93	107	5.94	5.8	345	1	88.4	1	37	2	3	5	24920.2	99.41	107.3	173.1	35.81	111.5	5.6	46	1.19	148	3.83	113	1.276	79	2.043	268.5	175	153.43	2	0	1	79	1	0	3	0	2	2	1	0	3.9	1	1	1
44104	32	24	15	5.36	86	4.77	4.2	249.8	1.02	90.17	2	80	3	4	2.33	28968.6	55.61	74.3	152.2	32.07	104	5.7	66	1.71	166	4.29	129	1.456	74	1.914	4.1	68	6.03	1	1	1	67	1	0	3	0	1	2	3	1	10	2	1	1
19891	31	28	39	13.92	117	6.495	9.7	577	2.1	185.64	1	81	3	5	5	8943.06	31.04	91.9	180.9	28.08	114.9	5.9	40	1.03	200	5.17	642	7.25	115	2.97	11	49	22.45	2	0	1	65	1	1	2	1	1	3	4	1	30	3	1	1
48337	31	24	20	7.14	155	8.6	5.1	303.3	0.92	81.33	1	66	5	5	2.35	15165.3	91.74	57.2	160.9	22.09	79.5	7	78	2.02	152	3.93	36	0.406	67	1.733	45.3	246	18.41	2	0	1	78	0	1	1	0	1	1	1	0	13.3	2	0	1
48657	31	31	12	4.28	99	5.5	5.6	333.1	0.72	63.65	2	75	2	3	1.47	9634.11	87.14	64.4	151.7	27.98	111.6	5.6	41	1.06	211	5.46	176	1.987	135	3.491	29.6	89	33.26	2	0	1	63	1	0	2	1	2	2	2	1	27.5	3	1	0
20045	30	26	18	6.43	93	5.162	5.8	345	0.9	79.56	2	69	1	1	1.4	3139.25	69.2	51.9	146.7	24.12	87.8	5.3	62	1.6	207	5.35	196	2.21	106	2.74	3.9	41	9.51	1	0	1	75	1	0	1	1	1	1	2	0	10	2	0	1
46452	30	29	11	3.93	91	5.05	6.9	410.4	1.19	105.2	1	67	3	3	1.27	16702.9	66.95	68	165.4	24.86	92	5.5	51	1.32	152	3.93	79	0.892	85	2.198	7.6	190	4	1	0	1	72	0	0	1	0	1	1	2	0	15.6	2	0	1
12945	29	25	11	3.93	85	4.718	4.7	279.6	0.8	70.72	2	62	3	3	2.01	27818.2	83.26	76.6	156.3	31.36	96.9	5.5	74	1.91	223	5.77	96	1.08	130	3.36	7.9	19	41.58	1	0	1	79	0	0	3	0	2	2	2	1	7.3	1	1	1
23935	29	31	7	2.5	97	5.38	4.8	285.5	1	88.4	1	31	4	3	1.65	25175.8	103.19	104	173.4	34.59	101.1	5.4	38	0.98	153	3.96	92	1.039	97	2.508	10.4	41	25.37	2	0	1	76	0	0	3	0	1	1	1	0	5.6	1	0	0
16790	28	29	13	4.64	109	6.051	4.8	285.5	0.8	70.72	2	70	4	4	2.86	6706.48	79.22	90.4	160.3	35.18	97.5	5.5	59	1.53	204	5.28	131	1.48	119	3.08	3.6	19	18.95	1	0	1	72	1	0	3	0	1	1	2	0	18.51	2	1	1
20351	28	29	21	7.5	91	5.051	7	416.4	0.9	79.56	2	60	3	5	3.73	19541.3	73.19	62	169.9	21.48	90.9	5.3	69	1.78	249	6.44	139	1.57	152	3.93	54.4	273	19.93	2	0	1	97	0	0	1	1	1	1	2	0	21.5	3	1	1
22930	28	38	15	5.36	155	8.6	7.9	469.9	1.1	97.24	2	70	1	3	1.81	3902.56	54.06	97.3	159.2	38.39	116.2	6.8	39	1.01	191	4.94	166	1.874	119	3.077	17.1	165	10.36	1	0	1	79	0	1	3	1	1	2	3	1	30	3	1	0
55057	27	30	14	5	139	7.72	5.2	309.3	0.98	86.63	2	71	4	5	3.32	13684.4	61.71	76.6	157.7	30.8	105.4	6.9	67	1.73	196	5.07	61	0.689	117	3.026	9.7	117	8.29	2	0	1	68	0	1	3	0	1	1	2	0	13.7	2	1	1
11507	24	23	25	8.93	234	12.989	5.2	309.3	1	88.4	1	85	1	1	1.21	1427.03	73.76	56.5	157.5	22.78	92.3	10	38	0.98	240	6.21	209	2.36	160	4.14	344	183	187.98	2	0	1	64	0	1	1	1	2	2	2	1	30	3	0	0
41563	24	31	11	3.93	94	5.22	6.9	410.4	0.78	68.95	2	46	3	5	5	80250.4	94.8	76.1	160.5	29.54	106	5	92	2.38	273	7.06	164	1.852	148	3.827	5.2	114	4.56	2	0	1	89	1	0	2	1	1	1	1	0	7.3	1	1	1
42900	24	31	16	5.71	117	6.49	7.6	452	1.22	107.85	1	63	4	5	5	7237.07	66.62	119	179.9	36.77	127	6.4	42	1.09	211	5.46	142	1.603	141	3.646	1202	80	1502.5	2	0	1	80	1	1	3	1	3	3	2	1	30	3	1	1
1316	23	22	18	6.4	137	7.605	6.5	386.6	0.5	44.2	2	65	1	1	1.35	2138.31	104.02	75.2	151.4	32.81	96.7	6.5	55	1.42	235	6.08	261	2.95	128	3.31	350	122	286.89	1	0	1	64	0	1	3	1	2	2	1	0	15.9	2	1	1
27504	23	24	22	7.85	137	7.6	5.4	321.2	1.4	123.76	1	75	3	4	2.55	32961.2	52.41	89.8	170.1	31.04	106.2	6.7	48	1.24	191	4.94	220	2.484	99	2.56	9.5	160	5.94	2	0	1	71	0	1	3	1	1	2	3	1	30	3	1	1
6249	23	22	12	4.3	105	5.829	5.2	309.3	0.4	35.4	2	70	2	1	0.17	30399.7	106.41	70	149.1	31.49	97.3	5.2	52	1.34	203	5.25	132	1.49	125	3.23	34.2	101	33.86	1	0	1	55	1	0	3	0	2	2	1	0	18.51	2	1	1
44521	22	33	45	16.07	143	7.94	11.8	701.9	1.72	152.05	2	80	3	2	1.72	31206	29.71	66.2	154	27.91	107.9	5.4	45	1.16	169	4.37	203	2.292	83	2.146	650	44	1477.27	1	1	1	58	0	1	2	1	3	4	5	1	30	3	1	0
62130	21	24	16	5.71	91	5.05	4.6	273.6	0.73	64.53	2	67	1	4	5	6121.39	90.08	48	153.5	20.37	71.6	5.3	60	1.55	183	4.73	138	1.558	95	2.457	2.8	55	5.09	2	0	1	81	0	0	1	1	1	1	1	0	13.7	2	0	1
41326	20	18	10	3.57	95	5.27	5.9	350.9	1	88.4	1	57	3	3	2.1	105889	87.79	121.2	172.2	40.87	129.5	5.7	45	1.16	245	6.34	126	1.423	175	4.526	3.1	138	2.25	1	0	1	89	1	0	3	0	1	1	2	0	30	3	1	1
4648	20	20	13	4.6	78	4.33	4.2	249.8	0.7	61.9	2	42	3	2	1.78	52060.7	110.67	77.1	158.1	30.85	94.3	5.1	54	1.38	161	4.16	59	0.67	96	2.48	1.7	37	4.59	2	0	1	95	0	0	3	0	1	1	1	0	5.3	1	1	1
19264	19	21	22	7.85	95	5.273	5.4	321.2	0.8	70.72	2	51	1	5	4.74	6670.63	89.15	61.6	158.6	24.49	77.6	5.4	48	1.24	207	5.35	116	1.31	136	3.52	21.4	110	19.45	2	0	1	90	1	0	1	0	1	1	2	0	7.3	1	0	0
26777	19	21	25	8.93	122	6.77	5.5	327.1	0.8	70.72	2	60	3	1	3.2	63775.1	84.3	68.8	160	26.88	97.7	5.9	41	1.06	241	6.23	212	2.393	158	4.086	7	132	5.3	2	0	1	89	1	1	2	1	1	1	2	0	21.5	3	1	0
43773	19	27	12	4.28	110	6.11	5.2	309.3	0.72	63.65	1	80	3	5	5	25528	92.36	61.5	163.8	22.92	89.9	5.9	51	1.32	120	3.1	79	0.892	53	1.371	7.8	146	5.34	2	1	1	65	1	0	1	0	1	1	1	0	30	3	0	1
8968	19	21	18	6.4	94	5.218	5.5	327.1	0.6	53	2	65	3	3	3.12	32432.9	99.55	79.2	154.5	33.18	99.8	5.1	55	1.42	270	6.98	233	2.63	169	4.37	9.8	144	6.81	1	0	1	76	0	0	3	1	1	1	1	0	27.5	3	1	1
51124	18	27	15	5.36	113	6.27	4.8	285.5	1.02	90.17	1	63	1	1	0.88	8842.52	82.58	83.9	167.9	29.76	108	5.8	56	1.45	254	6.57	102	1.152	178	4.603	9.2	180	5.11	1	0	1	77	1	0	2	0	1	1	2	0	30	3	1	1
40353	17	23	16	5.71	124	6.88	5.5	327.1	1.1	97.24	1	66	3	3	2.42	67421.6	74.04	81.1	166.6	29.22	104.2	5.8	65	1.68	282	7.29	105	1.185	196	5.069	4.7	108	4.35	1	1	1	73	1	1	2	0	1	1	2	0	30	3	1	1
944	17	19	15	5.4	89	4.94	4.8	285.5	0.4	35.4	2	54	1	2	2.67	4511.06	117.54	49	146.3	22.89	72	5.8	74	1.91	215	5.56	150	1.69	111	2.87	1.8	71	2.54	2	0	1	81	1	0	1	1	1	1	1	0	7.3	1	0	1
26155	16	18	16	5.71	95	5.27	7.9	469.9	1.2	106.08	1	71	3	4	0.96	15189	64.65	71.9	170.5	24.73	93.9	5.9	41	1.06	206	5.33	181	2.043	129	3.336	11.4	144	7.92	1	1	1	75	1	0	1	1	1	1	2	0	30	3	0	1
45768	16	24	11	3.93	89	4.94	5.1	303.3	0.82	72.49	2	80	3	3	5	24004.1	72.27	65.4	153.4	27.79	91.6	6.2	61	1.58	215	5.56	85	0.96	137	3.543	3.9	53	7.36	2	0	1	81	1	0	2	0	1	1	2	0	21.5	3	1	1
55664	16	23	17	6.07	104	5.77	6.5	386.6	0.82	72.49	1	62	3	3	4.1	59047.1	99.32	78	170.9	26.71	103.6	5.4	62	1.6	187	4.84	79	0.892	109	2.819	1.3	64	2.03	2	0	1	71	1	0	2	0	1	1	1	0	30	3	1	1
44703	15	16	26	9.28	136	7.55	6.3	374.7	1.32	116.69	1	80	3	4	1.83	26630	54.53	87.9	172.4	29.57	106.1	6.1	40	1.03	190	4.91	130	1.468	124	3.207	83.3	114	73.07	2	1	1	84	1	1	2	0	2	3	3	1	30	3	1	1
58894	15	24	10	3.57	93	5.16	6.6	392.6	1	88.4	1	63	4	4	1.64	8974.12	84.57	74.3	174.2	24.48	85.8	5.8	87	2.25	182	4.71	96	1.084	76	1.965	3.4	167	2.04	2	0	1	75	1	0	1	0	1	1	2	0	25.3	3	0	1
49732	14	12	14	5	173	9.6	4.3	255.8	0.69	61	1	57	5	2	0.97	22038.6	107.94	82.1	176.3	26.41	101	8.9	41	1.06	219	5.66	187	2.111	141	3.646	20.4	155	13.16	2	0	1	35	0	1	2	1	1	1	1	0	30	3	0	1
10581	13	21	13	4.64	79	4.385	4.7	279.6	0.7	61.88	2	40	3	4	1.59	21383.8	112.05	64.8	159.4	25.5	87.8	5.2	65	1.68	190	4.91	81	0.91	109	2.82	1.8	29	6.21	2	0	1	94	0	0	2	0	1	1	1	0	4.5	1	0	1
30339	13	15	8	2.86	79	4.39	3.6	214.1	0.8	70.72	2	56	3	5	4.79	101034	86.42	71.1	169.8	24.66	93.5	5.2	71	1.84	234	6.05	107	1.208	142	3.672	5.4	85	6.35	2	0	1	92	0	0	1	0	1	1	2	0	6.3	1	1	1
48797	12	15	9	3.21	95	5.27	6.8	404.5	0.77	68.07	1	80	2	4	1.06	5754.01	90.5	68.3	165.4	24.97	90.6	5.8	27	0.7	161	4.16	243	2.743	85	2.198	2.7	44	6.14	1	1	1	70	1	0	1	1	1	1	1	0	30	3	0	0
39861	8	17	28	10	121	6.72	6.5	386.6	2.8	247.52	1	63	4	4	1.5	9714.12	24.58	88.7	183.5	26.34	107.7	5.2	66	1.71	166	4.29	70	0.79	86	2.224	77.5	164	47.26	1	0	1	66	0	1	2	0	2	4	5	1	30	3	1	1
34074	106	49	11	3.93	118	6.55	6.2	368.8	0.9	79.56	1	41	2	4	2.21	71904.2	110.04	109.8	168.4	38.72	123	5.79	28	0.72	201	5.2	237	2.676	126	3.258	222	168	132.14	1	1	1	99	1	0	3	1	2	2	1	0	11.2	2	1	0
56698	86	40	10	3.57	115	6.38	6.8	404.5	0.66	58.34	1	29	1	1	1.03	33016	130.21	93.1	159.7	36.5	112.5	6.2	34	0.88	209	5.4	145	1.637	146	3.776	8.6	74	11.62	2	0	1	91	1	0	3	1	1	1	1	0	4.7	1	1	0
61903	76	47	9	3.21	103	5.72	5.8	345	0.75	66.3	1	54	3	4	1.16	20744.5	107.24	90.2	171.5	30.67	105.6	4.6	49	1.27	186	4.81	172	1.942	103	2.664	7.3	94	7.77	2	0	1	90	1	0	3	1	1	1	1	0	21.6	3	1	1
32167	51	42	17	6.07	195	10.82	4.5	267.7	1	88.4	1	75	3	3	3.66	51637	78.49	120.7	176.5	38.75	132.5	8.2	47	1.22	176	4.55	236	2.664	82	2.121	18.6	196	9.49	1	0	1	78	0	1	3	1	1	1	2	0	30	3	1	1
39946	50	38	13	4.64	362	20.09	4.1	243.9	0.8	70.72	2	55	2	2	2.67	61472.9	86.96	66.5	158.1	26.6	89.9	9.3	41	1.06	267	6.9	176	1.987	191	4.939	11	118	9.32	2	0	1	78	0	1	2	1	1	1	2	0	18.51	2	1	0
53055	50	32	8	2.86	259	14.38	4.3	255.8	0.79	69.84	1	41	4	4	2.68	26539.7	114.46	114.4	169.4	39.87	120	11.8	44	1.14	224	5.79	340	3.839	112	2.896	69.2	228	30.35	2	0	1	87	0	1	3	1	2	2	1	0	25.3	3	1	1
48503	44	43	9	3.21	119	6.61	7.7	458	0.77	68.07	1	58	3	3	1.35	24855.9	103.77	94.5	178.7	29.59	112.8	5.4	39	1.01	230	5.95	272	3.071	137	3.543	15.1	131	11.53	2	0	1	88	0	1	2	1	1	1	1	0	30	3	1	0
63845	44	25	15	5.36	132	7.33	7.7	458	0.88	77.79	1	43	3	4	1.21	28813	109.42	90.7	168.6	31.9	107.1	5.5	43	1.11	219	5.66	92	1.039	158	4.086	52	143	36.36	2	0	1	85	0	1	3	0	2	2	1	0	9.4	1	1	1
28884	42	38	5	1.79	105	5.83	5.8	345	0.7	61.88	2	65	4	4	2.8	12826.6	95.92	59.4	159.9	23.23	84.6	5.7	79	2.04	170	4.4	84	0.948	74	1.914	12.3	94	13.09	2	0	1	71	1	0	1	0	1	1	1	0	18.51	2	0	1
20353	41	21	14	5	108	5.995	7.2	428.3	1.5	132.6	1	40	4	3	2.43	8065.41	59.98	120.9	182.9	36.14	116	6.7	56	1.45	260	6.72	89	1	186	4.81	8580	136	6308.82	2	0	1	91	1	1	3	0	3	4	3	1	15.6	2	1	1
31273	40	37	17	6.07	94	5.22	6.9	410.4	1	88.4	1	62	3	2	3.9	57262.8	85.1	102.2	187.2	29.16	109.3	5.2	77	1.99	233	6.03	63	0.711	143	3.698	20.8	125	16.64	2	0	1	93	1	0	2	0	1	1	2	0	15.6	2	1	1
45831	40	34	12	4.28	113	6.27	8.3	493.7	1.37	121.11	1	62	4	2	2.69	7338.64	58.32	86.8	175.2	28.28	103.9	5.5	61	1.58	197	5.09	97	1.095	117	3.026	19.3	158	12.22	2	1	1	83	1	0	2	0	1	2	3	1	21.6	3	1	1
6039	36	24	15	5.4	168	9.326	6.4	380.7	0.6	53	1	42	3	4	2.75	44161.9	123.6	132.6	165.8	48.24	147.7	9.1	38	0.98	279	7.21	583	6.58	115	2.97	854	71	1202.82	1	0	1	89	0	1	3	1	3	3	1	0	18.4	2	1	0
9353	36	25	19	6.8	88	4.885	8.3	493.7	0.8	70.7	1	32	3	3	5	50530.4	120.59	101.2	175.3	32.93	107.8	4.9	42	1.08	161	4.16	159	1.8	87	2.25	3.3	122	2.7	2	0	1	75	0	0	3	1	1	1	1	0	6.7	1	1	1
26711	32	29	13	4.64	106	5.88	4.8	285.5	0.8	70.72	2	81	3	2	2.27	15578	73.98	94.2	159.1	37.21	109.4	5.4	57	1.47	239	6.18	89	1.005	164	4.241	19.4	216	8.98	2	1	1	72	1	0	3	0	1	1	2	0	21.5	3	1	1
57050	31	32	23	8.21	126	6.99	8	475.8	1.34	118.46	1	78	2	5	4.37	11522.5	54.22	92.5	170.7	31.74	115.2	6.3	53	1.37	177	4.58	119	1.344	100	2.586	4.5	134	3.36	2	0	1	69	1	1	3	0	1	2	3	1	30	3	1	1
14112	30	23	12	4.28	97	5.384	6.8	404.5	1	88.4	1	57	3	3	0.93	11391.5	87.79	85	168.8	29.83	111.4	5.3	28	0.72	174	4.5	143	1.61	117	3.03	38	200	19	1	0	1	98	1	0	2	1	1	1	2	0	29.4	3	1	0
12664	29	24	22	7.85	100	5.551	6.4	380.7	0.8	70.72	2	48	4	3	1.5	13656.3	90.83	71.9	166.2	26.03	92.2	5.8	62	1.6	237	6.13	100	1.13	155	4.01	369.5	145	254.83	2	0	1	87	1	1	2	0	2	2	1	0	4.5	1	1	1
22409	28	19	30	10.71	145	8.05	7.8	463.9	1.1	97.24	1	71	3	1	1.52	36125	71.77	73.4	168.3	25.91	106.6	5.8	72	1.86	222	5.74	115	1.298	127	3.284	10.1	105	9.62	2	0	1	57	1	1	2	0	1	1	2	0	30	3	1	1
289	28	25	13	4.6	98	5.44	5.4	321.2	0.6	53	1	62	3	4	4.07	29715.8	109.15	70.5	170.6	24.22	99.7	5.3	52	1.34	162	4.19	145	1.64	81	2.09	9.5	136	6.99	2	0	1	84	0	0	1	1	1	1	1	0	29.4	3	0	1
32452	27	26	13	4.64	116	6.44	5.8	345	1.1	97.24	1	74	3	5	5	41236.4	70.44	81.8	177.4	25.99	105.1	5.6	53	1.37	232	6	109	1.231	157	4.06	2.4	72	3.33	2	0	1	63	1	0	2	0	1	1	2	0	30	3	1	1
16447	26	25	20	7.14	99	5.495	6	356.9	1.1	97.24	1	66	3	5	3.45	18458.9	74.04	76.3	167.2	27.29	100.4	5.5	44	1.14	238	6.15	83	0.94	177	4.58	3.2	177	1.81	2	0	1	81	0	0	2	0	1	1	2	0	29.4	3	0	1
29959	26	28	13	4.64	91	5.05	6.3	374.7	1.2	106.08	1	61	3	5	4.13	43865.8	68.8	78.2	168.9	27.41	95.9	5.2	53	1.37	142	3.67	59	0.666	77	1.991	1	27	3.7	2	0	1	95	0	0	2	0	1	1	2	0	25.3	3	0	1
63143	26	29	14	5	107	5.94	6.5	386.6	0.92	81.33	1	70	5	1	1.22	10498.5	89.49	80.4	161.4	30.9	104.6	5.9	30	0.78	148	3.83	263	2.969	65	1.681	15.5	120	12.92	1	1	1	85	1	0	3	1	1	1	2	0	30	3	1	0
15280	25	24	8	2.86	98	5.44	6.5	386.6	0.9	79.56	1	46	3	4	2	47419.9	106.67	83.6	177	26.68	98	5.3	41	1.06	241	6.23	115	1.3	177	4.58	19.5	115	16.96	2	0	1	79	1	0	2	0	1	1	1	0	15.6	2	0	1
36362	25	27	15	5.36	101	5.61	5.4	321.2	0.9	79.56	2	49	4	2	1.72	24106	78.37	65.4	155.4	27.08	92	5.7	60	1.55	129	3.34	67	0.756	56	1.448	19.9	98	20.31	2	0	1	69	1	0	2	0	1	1	2	0	5.3	1	1	1
39382	25	22	15	5.36	97	5.38	5.7	339	1	88.4	2	76	3	4	1.89	56799.7	58.39	76.8	166	27.87	104.6	6	60	1.55	214	5.53	114	1.287	131	3.388	2.6	44	5.91	2	1	1	63	1	0	2	0	1	2	3	1	21.5	3	1	1
28023	24	22	9	3.21	100	5.55	7	416.4	0.8	70.72	1	26	5	4	1.83	72074.1	125.17	111.6	182.2	33.62	113.4	4.9	44	1.14	199	5.15	105	1.185	134	3.465	30.2	332	9.1	2	0	1	81	1	0	3	0	1	1	1	0	3.3	1	1	1
2864	24	24	15	5.4	108	5.995	3.7	220.1	0.5	44.2	2	71	1	1	0.64	1266.59	100.21	57.64	140.4	29.24	96.5	6	59	1.53	223	5.77	132	1.49	137	3.54	19.2	73	26.3	1	0	1	70	1	1	2	0	1	1	1	0	11.7	2	1	1
42517	24	24	9	3.21	91	5.05	5.3	315.2	0.72	63.65	2	60	4	5	5	11630.6	95.66	88.3	174.1	29.13	95.3	5.6	89	2.3	191	4.94	93	1.05	83	2.146	22	166	13.25	2	0	1	93	0	0	2	0	1	1	1	0	10	2	1	1
48876	24	20	18	6.43	103	5.72	9.5	565.1	0.71	62.76	2	69	2	4	2.14	6759.89	91.98	86.3	150.8	37.95	110	5.8	48	1.24	232	6	228	2.574	138	3.569	5.8	80	7.25	1	0	1	74	1	0	3	1	1	1	1	0	18.51	2	1	0
62177	24	23	16	5.71	89	4.94	5	297.4	0.99	87.52	1	51	5	3	2.07	7879.75	92.23	57.3	168.9	20.1	81.1	5.8	43	1.11	198	5.12	126	1.423	130	3.362	10	123	8.13	2	0	1	70	1	0	1	0	1	1	1	0	25.3	3	0	1
17922	23	24	13	4.64	80	4.441	3.9	232	0.6	53.04	2	64	3	3	2.34	19541.3	100.17	47.6	158.5	18.95	65.7	5.2	103	2.66	238	6.15	104	1.17	114	2.95	2.1	58	3.62	2	0	1	69	0	0	1	0	1	1	1	0	7.3	1	0	1
19040	23	29	12	4.28	89	4.94	4.3	255.8	0.8	70.72	2	67	3	2	2.07	27464.9	80.71	47.2	155	19.65	77	5.2	46	1.19	224	5.79	175	1.98	143	3.7	19.8	115	17.22	2	1	1	84	0	0	1	1	1	1	2	0	30	3	0	0
20440	23	25	15	5.36	102	5.662	6.3	374.7	1	88.4	1	63	3	5	5	23818.2	84.57	78	173.8	25.82	90.9	5.2	82	2.12	178	4.6	69	0.78	82	2.12	21.8	196	11.12	2	0	1	73	1	0	2	0	1	1	2	0	13.3	2	0	1
33321	23	21	16	5.71	103	5.72	8.8	523.4	1.4	123.76	1	63	3	4	3.41	62773.4	56.48	87.6	182.7	26.24	98	4.4	50	1.29	227	5.87	193	2.179	138	3.569	5.7	145	3.93	2	0	1	80	1	0	2	1	1	2	3	1	29.4	3	0	1
45558	23	20	27	9.64	124	6.88	6.6	392.6	1.31	115.8	2	73	2	1	1.39	6611.77	43.02	83.8	149.5	37.49	106	6.5	39	1.01	147	3.8	140	1.581	80	2.069	204.5	288	71.01	1	1	1	57	0	1	3	1	2	4	4	1	27.5	3	1	0
48826	23	23	18	6.43	104	5.77	5.8	345	1.18	104.31	1	71	3	3	2.14	13936.4	65.97	112.2	182.5	33.69	124.7	6.5	42	1.09	137	3.54	137	1.547	68	1.758	4.7	106	4.43	2	0	1	63	1	1	3	1	1	1	2	0	30	3	1	1
48887	23	23	22	7.85	369	20.48	7	416.4	1.12	99.01	1	72	4	2	3.07	10181.5	69.8	83.8	180.2	25.81	94.4	9	60	1.55	141	3.65	49	0.553	71	1.836	282	69	408.7	1	0	1	87	0	1	2	0	3	3	2	1	21.6	3	0	1
4964	23	24	12	4.3	94	5.218	6.6	392.6	0.8	70.7	1	70	1	2	3.25	1127.44	95.21	85.8	166.1	31.1	108.4	5.5	42	1.09	265	6.85	146	1.65	194	5.02	15.5	62	25	2	0	1	80	1	0	3	1	1	1	1	0	30	3	1	1
62419	23	26	15	5.36	99	5.5	6	356.9	0.91	80.44	1	80	3	3	0.65	42993.2	85.2	81.3	175.2	26.5	102.9	5.5	65	1.68	155	4.01	65	0.734	77	1.991	11.8	176	6.7	2	0	1	71	1	0	2	0	1	1	2	0	21.6	3	1	1
8388	23	27	8	2.9	87	4.829	8.9	529.4	0.8	70.7	1	62	4	2	2.7	5389.14	100.06	84.3	176.9	26.94	99	4.8	40	1.03	167	4.32	267	3.01	74	1.91	6.9	156	4.42	2	0	1	70	0	0	2	1	1	1	1	0	30	3	0	1
15666	22	22	15	5.36	97	5.384	5.8	345	0.8	70.72	2	73	3	1	2.1	19145.2	77.75	67	155.2	27.82	97.4	5.7	60	1.55	245	6.34	178	2.01	149	3.85	3.9	74	5.27	1	0	1	81	1	0	2	1	1	1	2	0	21.5	3	1	1
24455	22	23	15	5.36	96	5.33	3.8	226	0.7	61.88	1	69	1	1	1.34	4346.33	99.74	74.9	171.7	25.41	92.4	5.2	68	1.76	241	6.23	119	1.344	149	3.853	14.5	118	12.29	2	0	1	91	0	0	2	0	1	1	1	0	30	3	0	1
3410	22	25	17	6.1	93	5.162	5.7	339	0.5	44.2	2	62	3	4	5	21484.1	105.98	60	158.5	23.88	85	4.8	82	2.13	247	6.39	108	1.22	143	3.7	7	109	6.42	2	0	1	80	0	0	1	0	1	1	1	0	7.3	1	0	1
36323	22	26	13	4.64	80	4.44	3.3	196.3	0.9	79.56	2	50	3	3	1.95	110712	77.88	52.4	169.6	18.22	68.6	5.2	86	2.22	288	7.45	93	1.05	183	4.732	5.7	27	21.11	2	0	1	94	0	0	1	0	1	1	2	0	7.3	1	0	1
61960	22	18	12	4.28	124	6.88	5.9	350.9	0.57	50.39	2	78	3	4	2.12	38534.2	92.96	111.7	154.2	46.98	129.5	6.1	56	1.45	221	5.72	144	1.626	136	3.517	4.6	57	8.07	1	0	1	79	1	1	3	1	1	1	1	0	21.5	3	1	1
62076	22	22	8	2.86	119	6.61	5.1	303.3	0.94	83.1	2	60	4	4	3.26	13992.5	69.47	111.9	165.2	41	114.2	6.9	47	1.22	208	5.38	159	1.795	129	3.336	36.4	157	23.18	1	1	1	93	0	1	3	1	1	1	2	0	15.9	2	1	0
18056	21	20	13	4.64	134	7.438	4.2	249.8	0.5	44.2	2	62	3	3	1.22	18257.9	105.98	78.7	160	30.74	98	6.4	66	1.71	219	5.66	147	1.66	124	3.21	11.6	23	50.43	2	0	1	85	1	1	3	1	2	2	1	0	18.51	2	1	1
2071	21	16	16	5.7	93	5.162	6.7	398.5	0.8	70.7	1	52	3	4	3.2	30254.6	106.48	110.4	174.8	36.13	117.9	5.1	34	0.89	198	5.12	206	2.33	122	3.15	8.2	210	3.9	2	0	1	104	0	0	3	1	1	1	1	0	29.4	3	1	0
41865	21	30	15	5.36	117	6.49	3.8	226	1.03	91.05	1	76	4	5	5	8434.92	75.28	95.4	184.5	28.03	103.4	6.7	47	1.22	177	4.58	122	1.377	106	2.741	65.4	366	17.87	2	0	1	79	1	1	2	0	1	1	2	0	30	3	1	1
54317	21	26	21	7.5	95	5.27	5.6	333.1	1.34	118.46	1	64	3	3	5	57793.1	59.15	85.5	184.6	25.09	103.2	5.6	52	1.34	244	6.31	136	1.535	165	4.267	6.2	74	8.38	2	0	1	76	0	0	2	1	1	2	3	1	21.6	3	1	1
61366	21	21	21	7.5	81	4.5	4.7	279.6	0.95	83.98	1	75	3	3	1.01	10077.3	83.47	61.9	174.3	20.37	86.2	5.4	60	1.55	165	4.27	48	0.542	95	2.457	39.6	135	29.33	1	0	1	74	0	0	1	0	1	1	2	0	30	3	0	1
6646	21	23	12	4.3	95	5.273	3.9	232	0.7	61.9	1	63	3	2	2.06	25235.9	103.53	63.4	165.1	23.26	90.8	5.6	60	1.55	213	5.51	98	1.11	133	3.44	2.8	63	4.44	1	0	1	71	0	0	1	0	1	1	1	0	30	3	0	1
10928	20	27	17	6.07	81	4.496	5.8	345	1	88.4	1	73	3	1	4.19	17204.1	79.47	85.5	169.5	29.76	110.4	5.1	58	1.5	202	5.22	135	1.52	117	3.03	2.1	48	4.38	1	0	1	70	0	0	2	1	1	1	2	0	30	3	1	1
18523	20	20	12	4.28	93	5.162	6.5	386.6	1	88.4	1	45	4	5	3.72	14464.1	94.59	97.3	184.6	28.55	105.2	5.5	47	1.22	237	6.13	247	2.79	141	3.65	5.5	213	2.58	1	0	1	89	0	0	2	1	1	1	1	1	15.6	2	1	1
19270	20	25	8	2.86	98	5.44	5.5	327.1	0.8	70.72	1	29	1	2	1.35	12424.4	122.86	72.6	167.7	25.81	94.4	5.5	33	0.85	191	4.94	180	2.03	122	3.15	4.1	35	11.71	2	0	1	82	1	0	2	1	1	1	1	0	7.9	1	0	0
211	20	24	17	6.1	123	6.828	4.7	279.6	0.7	61.9	1	76	3	4	2.4	17539.7	95.49	96.64	175.7	31.3	117.3	6.4	45	1.17	184	4.76	123	1.39	114	2.95	13.3	132	10.08	2	0	1	73	1	1	3	0	1	1	1	0	30	3	1	1
29708	20	16	13	4.64	94	5.22	7.7	458	0.6	53.04	2	57	3	4	5	37391.4	104.63	112.9	159.5	44.38	110.5	5.7	55	1.42	299	7.73	276	3.116	189	4.888	1.8	32	5.63	2	0	1	75	1	0	3	1	1	1	1	0	15.9	2	1	1
33500	20	24	8	2.86	198	10.99	5.3	315.2	0.9	79.56	1	53	4	2	2.71	25858.4	102.13	172.1	180.3	52.94	153.6	9.6	43	1.11	153	3.96	71	0.802	96	2.483	12.6	128	9.84	2	0	1	68	0	1	3	0	1	1	1	0	11.2	2	1	1
47109	20	20	11	3.93	79	4.39	3.6	214.1	0.81	71.6	1	63	4	2	0.77	7338.01	99.07	49.7	171.2	16.96	68	5.5	115	2.97	235	6.08	33	0.373	113	2.922	5.2	91	5.71	1	1	1	85	0	0	1	0	1	1	1	0	29.4	3	0	1
4853	20	26	15	5.4	88	4.885	4.9	291.5	0.8	70.7	2	62	3	5	5	21484.1	83.26	70.5	173.7	23.37	81.2	5.2	47	1.22	225	5.82	173	1.95	143	3.7	3.6	75	4.8	2	0	1	88	0	0	1	1	1	1	2	0	10	2	0	0
50477	20	23	14	5	81	4.5	5.3	315.2	0.91	80.44	2	53	3	3	4.5	32032.1	75.44	75.7	170.3	26.1	93.3	5.4	60	1.55	184	4.76	98	1.106	104	2.689	2.3	36	6.39	1	0	1	75	0	0	2	0	1	1	2	0	5.3	1	1	1
13867	19	18	19	6.78	203	11.269	5.4	321.2	0.8	70.72	1	81	1	1	0.93	3200.11	88.91	78.4	167.7	27.88	113.9	6.6	32	0.83	226	5.84	319	3.6	115	2.97	68.5	116	59.05	1	0	1	70	0	1	2	1	2	2	2	1	30	3	1	0
60477	19	20	20	7.14	112	6.22	6.2	368.8	0.85	75.14	1	69	1	2	2.49	9286.36	94.06	96.9	164.5	35.81	120.8	6	38	0.98	124	3.21	79	0.892	70	1.81	9.7	127	7.64	2	1	1	59	1	0	3	0	1	1	1	0	30	3	1	0
60842	19	15	8	2.86	134	7.44	5.2	309.3	0.63	55.69	2	48	4	4	4.8	25579.6	109.36	132.7	170.6	45.59	127.2	6.9	44	1.14	188	4.86	78	0.881	128	3.31	25.4	85	29.88	1	0	1	94	0	1	3	0	1	1	1	0	7.3	1	1	0
3617	18	17	14	5	91	5.051	6.2	368.8	0.6	53	1	70	1	1	1.08	1383.02	103.85	92.2	171.3	31.42	115.4	5.4	39	1	185	4.78	136	1.54	119	3.08	16	96	16.67	2	1	1	67	0	0	3	1	1	1	1	0	30	3	1	0
50084	18	24	39	13.92	123	6.83	9.9	588.9	1.95	172.38	2	80	3	3	1.57	35265.4	25.55	77.8	156.7	31.68	100.6	7.3	48	1.24	211	5.46	205	2.314	122	3.155	165	150	110	1	1	1	17	0	1	3	1	2	4	5	1	24.8	3	1	0
52031	18	14	22	7.85	104	5.77	6.5	386.6	0.87	76.91	1	77	3	4	3.44	32292.6	88.87	91	173.2	30.34	110.2	4.8	51	1.32	194	5.02	194	2.19	104	2.689	5.9	93	6.34	1	0	1	44	1	0	3	1	1	1	2	1	30	3	1	1
55572	18	23	22	7.85	151	8.38	7.2	428.3	1.65	145.86	2	80	3	3	1.39	29794.6	31.23	67.7	163	25.48	102.6	5.8	67	1.73	176	4.55	118	1.332	85	2.198	18.9	98	19.29	2	1	1	39	1	1	2	0	1	3	4	1	24.8	3	1	1
6123	18	22	17	6.1	102	5.662	5.6	333.1	0.5	44.2	2	58	4	4	3.1	20304	108.65	109.8	157.6	44.21	118	5.9	66	1.71	188	4.86	61	0.69	110	2.84	24.2	131	18.47	2	0	1	79	1	0	3	0	1	1	1	0	7.3	1	1	1
64930	18	25	34	12.14	137	7.6	7.6	452	1.34	118.46	1	74	3	3	1.29	13219.8	55.59	90	179.7	27.9	107.2	6.3	21	0.54	150	3.88	681	7.688	115	2.97	527.5	116	454.74	1	1	1	72	1	1	2	1	3	4	3	1	30	3	1	0
26567	17	23	10	3.57	121	6.72	6.2	368.8	1.1	97.24	1	85	1	1	1.09	3759.81	65.78	76	156.4	31.07	115.5	5.3	61	1.58	218	5.64	205	2.314	116	3	22.5	130	17.31	1	0	1	65	1	0	3	1	1	1	2	0	30	3	1	1
34012	17	29	20	7.14	89	4.94	5.9	350.9	0.8	70.72	2	82	3	1	1.27	36827.5	73.52	71.7	146.7	33.32	102.5	5.4	74	1.91	226	5.84	89	1.005	134	3.465	1.8	36	5	2	0	1	61	0	0	3	0	1	1	2	0	11.7	2	1	1
60151	16	17	21	7.5	84	4.66	8.2	487.7	1.12	99.01	1	71	3	4	3.85	27296	70.23	122.6	176.3	39.44	128.5	6.9	32	0.83	239	6.18	202	2.281	167	4.319	14.6	115	12.7	2	0	1	67	0	1	3	1	1	1	2	0	30	3	1	0
61033	16	18	6	2.14	148	8.22	5.3	315.2	0.65	57.46	2	47	4	4	1.64	26565.9	109.21	92	167.1	32.95	120.9	6.2	39	1.01	142	3.67	117	1.321	80	2.069	12.2	303	4.03	2	1	1	77	1	1	3	0	1	1	1	0	7.3	1	1	0
14696	15	22	7	2.5	75	4.163	4.3	255.8	0.8	70.72	2	46	4	4	1.9	16529.5	91.97	68.6	160.5	26.63	82.4	5.3	73	1.89	293	7.58	102	1.15	200	5.17	5.5	147	3.74	1	0	1	81	0	0	2	0	1	1	1	0	7.3	1	0	1
17152	15	25	20	7.14	84	4.663	5.9	350.9	1.1	97.24	1	80	3	1	0	6229.04	67.86	69.4	178.7	21.73	84.8	5.4	52	1.34	187	4.84	66	0.75	122	3.15	12.8	75	17.07	2	0	1	79	0	0	1	0	1	1	2	0	29.4	3	0	1
17253	15	23	10	3.57	80	4.441	3.8	226	0.8	70.72	2	42	4	4	3	16529.5	94.28	67.9	171.2	23.17	82.9	4.7	124	3.21	252	6.52	68	0.77	114	2.95	50.9	181	28.12	2	0	1	87	0	0	1	0	1	1	1	0	6.3	1	0	1
27170	15	24	11	3.93	100	5.55	5.7	339	1.4	123.76	2	84	3	4	4.13	24402.4	37.1	71.6	161.3	27.52	102	5.4	46	1.19	209	5.4	165	1.863	130	3.362	5	106	4.72	2	1	1	49	0	0	2	1	1	3	4	1	30	3	1	0
29577	15	19	14	5	139	7.72	5.1	303.3	0.8	70.72	2	68	1	2	1.99	3916	80.21	81.9	154.1	34.49	101.2	6.9	44	1.14	148	3.83	376	4.245	29	0.75	2.6	53	4.91	1	1	1	64	0	1	3	1	1	1	2	0	24.8	3	1	0
33922	15	21	17	6.07	125	6.94	5.3	315.2	0.8	70.72	2	83	3	3	2.39	30611.6	73.06	56.9	156.9	23.11	94	6.3	46	1.19	148	3.83	201	2.269	62	1.603	171.9	75	229.2	2	0	1	67	1	1	1	1	2	2	2	1	30	3	1	0
43882	15	21	7	2.5	213	11.82	4.7	279.6	0.7	61.88	2	50	4	3	2.84	21262.6	105.3	71.6	157.5	28.86	94.7	9.8	48	1.24	225	5.82	93	1.05	158	4.086	10.2	145	7.03	1	0	1	82	0	1	2	0	1	1	1	0	11.7	2	1	0
10517	14	17	11	3.93	102	5.662	4.9	291.5	0.9	79.56	2	63	4	3	1.28	4618.81	71.83	99.9	164.9	36.74	110.3	5.2	67	1.73	187	4.84	94	1.06	101	2.61	3.5	93	3.76	1	1	1	95	1	0	3	0	1	1	2	0	10	2	1	1
13048	14	23	8	2.86	93	5.162	4.2	249.8	0.8	70.72	2	83	3	4	1.93	7277.19	73.06	48.1	163.4	18.02	72.1	5.3	55	1.42	217	5.61	154	1.74	131	3.39	17.1	86	19.88	1	1	1	73	0	0	1	1	1	1	2	0	21.5	3	0	1
16299	14	21	13	4.64	86	4.774	4	237.9	0.7	61.88	2	49	3	4	5	49950.4	105.95	62	160.9	23.95	75.8	5.3	72	1.86	200	5.17	104	1.17	107	2.77	2.8	19	14.74	2	0	1	74	0	0	1	0	1	1	1	0	5.3	1	0	1
20200	14	15	12	4.28	96	5.329	5.2	309.3	0.9	79.56	2	70	3	3	2.19	19145.2	68.77	69.8	165.9	25.36	95.7	5.3	64	1.66	239	6.18	202	2.28	135	3.49	3.4	82	4.15	2	0	1	67	1	0	2	1	1	1	2	0	15.9	2	1	1
31762	14	17	18	6.43	181	10.05	5.2	309.3	1	88.4	2	70	1	1	0.62	7733.28	60.61	66.1	155.4	27.37	97.5	8.7	62	1.6	191	4.94	232	2.619	83	2.146	44.1	98	45	1	0	1	69	0	1	2	1	2	2	2	1	15.9	2	1	1
56309	14	21	13	4.64	106	5.88	5.9	350.9	0.66	58.34	2	80	3	5	3.09	32706.9	88.62	55.9	158.8	22.17	88.3	5.4	79	2.04	247	6.39	196	2.213	129	3.336	2	23	8.7	2	0	1	56	1	0	1	1	1	1	2	0	21.5	3	1	1
58501	14	22	10	3.57	112	6.22	6.7	398.5	1.14	100.78	1	60	4	3	0.82	12001.4	73.63	83.6	169.2	29.2	98.2	6.1	60	1.55	173	4.47	62	0.7	101	2.612	13.2	330	4	2	0	1	84	1	0	2	0	1	1	2	0	21.6	3	0	1
5683	13	16	31	11.1	246	13.655	7.7	458	1.2	106.1	2	76	4	2	1.8	6812.52	46.91	72.5	169.5	25.23	102.6	7.4	39	1	159	4.11	147	1.66	115	2.97	89.8	127	70.71	1	0	1	61	0	1	2	1	2	3	3	1	24.8	3	1	0
38125	12	18	19	6.78	119	6.61	6.4	380.7	1.1	97.24	1	66	3	5	5	60687.3	74.04	94.4	180	29.14	107.8	5.7	34	0.88	235	6.08	387	4.369	124	3.207	9.3	128	7.27	2	0	1	85	1	0	2	1	1	1	2	0	30	3	1	0
44117	12	18	15	5.36	91	5.05	4.1	243.9	0.62	54.81	2	67	4	2	1.46	10882.7	97.54	69.1	169	24.19	93.6	6.1	46	1.19	176	4.55	106	1.197	109	2.819	7.2	68	10.59	1	0	1	86	1	0	1	0	1	1	1	0	11.7	2	1	0
59102	10	17	14	5	149	8.27	3.6	214.1	0.66	58.34	2	72	1	1	0.84	11403.1	93.14	58.1	152.3	25.05	98	7.4	38	0.98	162	4.19	86	0.971	107	2.767	11.7	38	30.79	1	0	1	69	0	1	2	0	2	2	1	0	13.7	2	1	0
58749	124	189	16	5.71	91	5.05	8.6	511.5	0.99	87.52	1	63	4	4	3.77	9217.77	85.6	74.4	159.5	29.24	96.5	5.5	42	1.09	278	7.19	122	1.377	212	5.482	25.3	92	27.5	1	0	1	84	0	0	2	0	1	1	2	0	30	3	0	1
59591	47	49	15	5.36	73	4.05	6.9	410.4	1.3	114.92	2	76	4	4	1.58	17995	42.62	104.9	162.9	39.53	118.7	6.5	49	1.27	221	5.72	89	1.005	154	3.982	14.6	197	7.41	2	1	1	57	0	1	3	0	1	3	4	1	24.8	3	1	0
57677	41	34	8	2.86	90	5	5.6	333.1	1.04	91.94	1	42	4	5	1.02	24251	91.94	86.4	176.6	27.7	91.6	5.7	33	0.85	186	4.81	123	1.389	128	3.31	6.3	107	5.89	2	0	1	106	1	0	2	0	1	1	1	0	9.4	1	0	0
6617	37	19	14	5	96	5.329	6	356.9	0.7	61.9	1	47	1	3	0.11	4107.74	114.37	94.4	169.8	32.74	115.8	5.8	37	0.95	245	6.34	418	4.72	115	2.97	9.5	189	5.03	2	0	1	93	1	0	3	1	1	1	1	0	15.6	2	1	0
22514	34	24	13	4.64	115	6.38	6.8	404.5	0.8	70.72	1	65	3	4	5	45255.8	98.21	93.4	166	33.89	110.5	5.5	61	1.58	205	5.3	195	2.202	105	2.715	12.1	145	8.34	2	0	1	69	1	0	3	1	1	1	1	0	29.4	3	1	1
21396	33	28	14	5	108	6	5.1	303.3	0.6	53.04	2	61	1	1	0.3	4547.04	102.06	58.4	152.5	25.11	91.8	5.6	64	1.66	321	8.3	198	2.235	217	5.612	15.2	152	10	2	0	1	77	1	1	2	1	1	1	1	0	15.9	2	1	1
27471	33	22	9	3.21	149	8.27	7.1	422.3	0.8	70.72	1	47	3	4	1.97	98374.1	109.85	91	166.6	32.79	113.7	6.6	31	0.8	211	5.46	154	1.739	149	3.853	8.5	118	7.2	1	0	1	91	0	1	3	1	1	1	1	0	30	3	1	0
59391	33	33	19	6.78	110	6.11	8.9	529.4	0.96	84.86	1	60	3	3	5	62342.3	90.49	93.7	180.3	28.82	101.2	4.9	38	0.98	146	3.78	113	1.276	85	2.198	12	179	6.7	2	1	1	86	1	0	2	0	1	1	1	0	25.3	3	0	0
55936	31	32	10	3.57	98	5.44	6.1	362.8	1.15	101.66	1	39	4	4	0.24	19310.8	83.02	97.7	191.4	26.67	96.1	5.7	40	1.03	320	8.28	239	2.698	232	6	6.9	217	3.18	2	0	1	85	1	0	2	1	1	1	2	0	7.9	1	0	1
18889	30	24	18	6.43	93	5.162	5.9	350.9	0.9	79.56	2	74	1	3	5	2987.74	67.08	89.2	157.8	35.82	100.1	5.7	62	1.6	207	5.35	192	2.17	107	2.77	23.7	61	38.85	2	0	1	83	1	0	3	1	2	2	2	1	18.51	2	1	1
37600	30	29	14	5	94	5.22	4.7	279.6	1	88.4	1	47	4	5	5	19404	93.42	96	175.5	31.17	109	6.2	44	1.14	208	5.38	57	0.644	153	3.957	13.7	210	6.52	2	0	1	71	1	0	3	0	1	1	1	0	13.3	2	1	1
51976	30	25	13	4.64	150	8.33	5.9	350.9	0.93	82.21	1	79	3	5	5	34940.3	83.53	88.3	178.3	27.78	108	7.1	50	1.29	188	4.86	143	1.614	109	2.819	6.2	133	4.66	2	0	1	76	0	1	2	1	1	1	2	0	30	3	1	1
14046	29	21	17	6.07	97	5.384	4.4	261.7	0.8	70.72	2	47	3	5	5	49950.4	91.4	85.1	159.1	33.62	97	5.3	59	1.53	211	5.46	189	2.13	114	2.95	1	18	5.56	2	0	1	83	0	0	3	1	1	1	1	0	4.5	1	1	1
53316	29	24	15	5.36	95	5.27	7.6	452	1.19	105.2	2	52	3	2	0.91	26933.6	55.01	103.3	157.3	41.75	131.6	6	40	1.03	173	4.47	197	2.224	94	2.431	1250	141	886.52	1	1	1	71	1	0	3	1	3	4	3	1	18.51	2	1	0
16199	25	27	9	3.21	80	4.441	7	416.4	0.7	61.88	2	47	4	4	2.28	17865.7	107.28	102.6	163.2	38.52	115	5.7	43	1.11	183	4.73	114	1.29	117	3.03	118.5	122	97.13	2	0	1	82	1	0	3	0	2	2	1	0	5.3	1	1	0
3367	24	22	24	8.6	94	5.218	7.3	434.2	0.8	70.7	2	77	3	4	1.44	22866.1	75.84	84.5	163	31.8	98.4	5.5	43	1.12	182	4.71	137	1.55	111	2.87	4.8	83	5.78	1	0	1	81	0	0	3	1	1	1	2	0	24.8	3	1	0
6682	24	37	20	7.1	113	6.273	4.6	273.6	0.8	70.7	1	83	3	5	4.17	9082.28	87.81	78.2	178.8	24.46	97.3	6.1	63	1.64	215	5.56	76	0.86	137	3.54	1	24	4.17	2	0	1	59	1	0	1	0	1	1	2	0	29.4	3	0	1
10901	23	34	12	4.28	83	4.607	6	356.9	1	88.4	1	72	4	4	1.98	5187.82	79.97	57.1	168.7	20.06	80.3	5.3	85	2.2	198	5.12	80	0.9	97	2.51	3.3	64	5.16	2	0	1	0	0	0	1	0	1	1	2	0	30	3	0	1
43568	23	27	7	2.5	105	5.83	6	356.9	1.03	91.05	1	49	4	2	0.85	31914.6	89.05	71.1	176	22.95	83	6.2	71	1.84	226	5.84	151	1.705	125	3.233	24.4	139	17.55	2	0	1	78	1	0	1	1	1	1	2	0	15.6	2	0	1
5894	23	21	44	15.7	205	11.38	6.2	368.8	2.1	185.6	1	64	3	5	2.67	21295.4	34.5	117	181.4	35.56	122.2	7	43	1.12	234	6.05	183	2.07	154	3.98	3400	127	2677.17	1	1	1	73	0	1	3	1	3	4	4	1	30	3	1	1
32107	22	22	9	3.21	102	5.66	5	297.4	0.8	70.72	1	50	3	5	3.74	95301.6	107.82	55.2	173.3	18.38	72.7	5	68	1.76	215	5.56	48	0.542	137	3.543	1.1	17	6.47	2	0	1	93	1	0	1	0	1	1	1	0	18.4	2	0	1
64789	22	22	9	3.21	125	6.94	7	416.4	0.88	77.79	1	67	4	5	5	7736.56	94.25	109.9	188.5	30.9	120.3	5	52	1.34	238	6.15	94	1.061	167	4.319	6.7	198	3.38	2	0	1	77	0	1	3	0	1	1	1	0	30	3	1	1
10374	21	18	13	4.64	112	6.217	5.2	309.3	0.7	61.88	2	81	3	3	3.27	7194.75	86.83	66	155.1	27.44	95	5.7	67	1.73	210	5.43	161	1.82	111	2.87	8.8	130	6.77	2	0	1	73	1	0	2	1	1	1	2	0	18.51	2	1	1
46594	21	20	11	3.93	148	8.22	6.7	398.5	0.8	70.72	2	60	4	3	3.86	9037.01	84.3	81.1	169.1	28.36	104.8	7.4	43	1.11	197	5.09	301	3.398	94	2.431	61.5	290	21.21	2	0	1	73	0	1	2	1	1	1	2	0	15.9	2	1	0
7269	21	24	17	6.1	102	5.662	8.5	505.6	1.3	114.9	1	79	1	1	1.7	1221.33	55.88	81.2	169.3	28.33	104.8	6	38	0.99	205	5.3	185	2.09	130	3.36	280.5	81	346.3	1	0	1	73	1	0	2	1	3	4	3	1	30	3	1	0
35232	20	22	9	3.21	120	6.66	5.7	339	0.7	61.88	2	67	1	3	1.95	10668.7	94.73	69.4	158.7	27.56	97.3	6.1	53	1.37	229	5.92	247	2.789	127	3.284	7.7	21	36.67	1	0	1	67	1	1	2	1	2	2	1	0	15.9	2	1	1
27290	19	27	13	4.64	102	5.66	2.5	148.7	0.9	79.56	2	83	3	4	0.99	17317.9	63.43	44.7	151.6	19.45	82.9	5.5	84	2.17	232	6	111	1.253	126	3.258	15.2	43	35.35	1	0	1	79	0	0	1	0	2	2	2	1	11.7	2	0	1
7489	19	22	19	6.8	91	5.051	4.4	261.7	0.5	44.2	2	68	3	4	5	28141.2	102.1	82.9	171.4	28.22	102.9	5.1	69	1.78	245	6.34	126	1.42	151	3.9	4	52	7.69	2	0	1	88	0	0	2	0	1	1	1	0	15.9	2	1	1
46635	18	19	10	3.57	104	5.77	5.5	327.1	0.7	61.88	2	33	3	4	1.62	42370.7	117.04	80.2	158.5	31.92	107.2	5.7	46	1.19	183	4.73	149	1.682	107	2.767	6.2	118	5.25	1	0	1	77	1	0	3	1	1	1	1	0	3.9	1	1	0
9347	18	22	14	5	99	5.495	6	356.9	1	88.4	2	83	4	1	0.49	5994.55	55.9	76.2	163	28.68	105	5.6	44	1.14	179	4.63	74	0.84	120	3.1	3	88	3.41	1	0	1	57	1	1	2	0	1	2	3	1	24.8	3	1	0
61874	17	21	18	6.43	96	5.33	6.3	374.7	1.52	134.37	1	66	4	3	1.06	12079.2	50.22	101.1	173.8	33.47	117.5	5.9	30	0.78	210	5.43	263	2.969	127	3.284	3.4	132	2.58	2	0	1	73	1	0	3	1	1	2	3	1	30	3	1	0
50048	16	23	12	4.28	94	5.22	6.9	410.4	0.82	72.49	2	43	4	2	1.1	26854.5	90.96	72.7	162.2	27.63	107.6	5.35	27	0.7	141	3.65	250	2.823	64	1.655	9.6	87	11.03	1	0	1	79	1	0	2	1	1	1	1	1	7.3	1	1	0
5542	16	21	10	3.6	91	5.051	4.1	243.9	0.8	70.7	1	56	3	5	2.26	39190.4	103.87	45	162.2	17.1	70	4.9	48	1.23	181	4.68	59	0.67	122	3.15	0.9	17	5.29	1	0	1	67	0	0	1	0	1	1	1	0	15.6	2	0	1
61949	16	21	14	5	220	12.21	3.4	202.2	0.86	76.02	2	61	2	2	0.72	4735.92	76.81	78	153.7	33.02	98.1	8.8	41	1.06	183	4.73	219	2.473	98	2.534	13.7	96	14.27	2	0	1	68	0	1	3	1	1	1	2	0	15.9	2	1	0
37460	15	19	9	3.21	94	5.22	6.3	374.7	0.9	79.56	2	79	1	3	1.53	6781.42	65.03	69.7	165.9	25.32	96	5.4	60	1.55	203	5.25	149	1.682	113	2.922	25.5	86	29.65	2	0	1	60	0	0	2	1	1	1	2	0	30	3	1	1
63959	14	18	7	2.5	84	4.66	2.1	124.9	0.94	83.1	1	41	3	3	1.17	27356.1	104.44	82.2	177.5	26.1	96.7	6.3	32	0.83	230	5.95	336	3.793	131	3.388	6.5	98	6.63	1	0	1	80	1	0	2	1	1	1	1	0	29.4	3	0	0
12994	12	16	7	2.5	97	5.384	3.9	232	0.8	70.72	2	54	4	3	2.26	16529.5	87.5	72.2	155	30.05	88	5.7	95	2.46	340	8.79	130	1.47	219	5.66	4.8	169	2.84	2	0	1	71	1	0	3	0	1	1	2	0	18.51	2	1	1
18718	12	14	12	4.28	104	5.773	5.6	333.1	1.2	106.08	1	76	4	4	1.64	4785.22	62.67	93.8	184.8	27.47	105.4	6	39	1.01	167	4.32	194	2.19	89	2.3	7.2	210	3.43	1	0	1	83	1	0	2	1	1	1	2	0	30	3	1	0
51675	12	21	14	5	94	5.22	4.9	291.5	1.32	116.69	2	80	3	2	1.72	22147.7	40.81	49	158.8	19.43	74.7	5.4	47	1.22	165	4.27	142	1.603	90	2.327	7.5	107	7.01	2	0	1	39	0	0	1	1	1	3	4	1	21.5	3	0	0
52497	10	20	11	3.93	88	4.88	2.6	154.6	0.54	47.74	2	78	3	4	0.42	20419.6	94.18	63.4	156.4	25.92	97	5.5	54	1.4	211	5.46	102	1.152	137	3.543	13.7	87	15.75	1	0	1	94	0	0	2	0	1	1	1	0	30	3	1	1
3432	124	50	10	3.6	103	5.718	5.9	350.9	0.6	53	1	27	1	4	5	11192.9	135.69	93.2	165.5	34.03	110.1	5.1	36	0.94	148	3.83	72	0.81	97	2.51	9.1	174	5.23	2	0	1	87	0	0	3	0	1	1	1	0	5.6	1	1	0
9972	65	49	11	3.93	99	5.495	8.6	511.5	0.9	79.56	1	44	3	3	4.74	48456.5	108.01	101.5	173.2	33.84	116	5.7	37	0.96	193	4.99	170	1.92	122	3.15	3.6	99	3.64	1	0	1	85	1	0	3	1	1	1	1	0	15.6	2	1	0
15139	58	83	9	3.21	131	7.272	5.6	333.1	0.7	61.88	2	63	4	2	1.04	7964.76	97.12	82.5	158.8	32.72	108.6	7.7	39	1.01	188	4.86	127	1.43	124	3.21	37.2	136	27.35	1	0	1	81	0	1	3	0	1	1	1	0	24.8	3	1	0
4525	57	45	14	5	97	5.384	6.8	404.5	0.7	61.9	1	67	3	2	1.55	30305.5	100.99	83.3	178.3	26.2	99.2	5.3	60	1.56	202	5.22	169	1.91	108	2.79	41.8	111	37.66	2	1	1	102	1	0	2	1	2	2	1	0	30	3	0	1
35918	55	37	11	3.93	106	5.88	5.7	339	0.8	70.72	1	51	1	1	1.51	20000.7	107.15	75.1	165.2	27.52	93.8	5.2	30	0.78	232	6	501	5.656	115	2.97	1.2	120	1	2	0	1	85	1	0	2	1	1	1	1	0	18.4	2	0	0
3519	50	52	7	2.5	100	5.551	5.4	321.2	0.7	61.9	1	60	3	2	0.72	24004.5	105.48	57.7	171.7	19.57	84.1	5.4	116	3	238	6.15	45	0.51	113	2.92	4.7	112	4.2	2	1	1	75	1	0	1	0	1	1	1	1	29.4	3	0	1
50101	46	75	20	7.14	134	7.44	5.2	309.3	1.02	90.17	1	72	3	3	1.47	8384.65	78.09	114.6	176.3	36.87	121.6	6.2	55	1.42	209	5.4	165	1.863	121	3.129	9.9	142	6.97	2	1	1	89	1	1	3	1	1	1	2	1	30	3	1	1
21494	45	36	8	2.86	94	5.22	7.1	422.3	0.9	79.56	1	30	3	3	5	89677.8	117.83	139	193.2	37.24	118.9	5.4	35	0.91	185	4.78	111	1.253	128	3.31	22.8	237	9.62	2	0	1	95	0	0	3	0	1	1	1	0	6.7	1	1	0
43413	45	42	16	5.71	107	5.94	7.3	434.2	0.8	70.72	2	61	3	4	0.58	25164.3	83.78	86.1	160.2	33.55	117.4	5.8	45	1.16	195	5.04	160	1.806	118	3.051	14.9	78	19.1	1	0	1	69	1	0	3	1	1	1	2	0	15.9	2	1	0
57100	41	31	9	3.21	164	9.1	6.3	374.7	1.04	91.94	1	69	4	3	2.1	8412.93	77.73	105.9	174.1	34.94	120.4	7	43	1.11	188	4.86	267	3.014	92	2.379	10.9	42	25.95	2	0	1	90	0	1	3	1	1	1	2	0	30	3	1	1
52907	38	43	9	3.21	126	6.99	5.9	350.9	0.68	60.11	2	40	1	4	1.91	11952	112.84	165.3	177.3	52.58	136	6.9	51	1.32	215	5.56	171	1.931	130	3.362	81.3	132	61.59	2	0	1	97	0	1	3	1	2	2	1	0	3.9	1	1	1
16013	37	34	18	6.43	110	6.106	6.3	374.7	0.8	70.72	1	38	1	2	3.14	12045.5	116.17	91.3	172.7	30.61	97	5.2	46	1.19	248	6.41	319	3.6	138	3.57	8.7	81	10.74	2	0	1	82	1	0	3	1	1	1	1	0	6.7	1	0	1
13682	36	27	15	5.36	89	4.94	5.2	309.3	0.7	61.88	2	58	3	3	1.16	37393.1	100.19	71	152.5	30.53	95.4	5.1	48	1.24	211	5.46	173	1.95	128	3.31	4.9	92	5.33	2	0	1	77	0	0	3	1	1	1	1	0	13.7	2	1	0
23351	36	31	9	3.21	104	5.77	5.9	350.9	1.1	97.24	1	51	3	3	3.39	73250.4	81.27	123.7	182.8	37.02	129.8	5.4	45	1.16	212	5.48	203	2.292	126	3.258	16.7	211	7.91	2	0	1	95	1	0	3	1	1	1	2	0	29.4	3	1	1
27610	35	27	12	4.28	118	6.55	5.6	333.1	0.9	79.56	1	75	3	1	2.06	32966.3	89.07	92.5	169.1	32.35	111.6	5.9	43	1.11	220	5.69	102	1.152	157	4.06	20.1	110	18.27	2	0	1	69	1	0	3	0	1	1	2	0	30	3	1	1
44883	34	27	14	5	252	13.99	4.8	285.5	0.76	67.18	1	50	4	2	4.72	20000.3	109.5	102.2	178.8	31.97	111.1	9.3	56	1.45	204	5.28	403	4.55	115	2.97	122.1	143	85.38	2	0	1	87	0	1	3	1	2	2	1	0	11.2	2	1	1
54197	34	31	18	6.43	108	6	2.8	166.5	0.61	53.92	2	80	1	1	2.08	10638.8	90.32	49	141.3	24.54	87.4	5.7	45	1.16	204	5.28	416	4.697	115	2.97	921	112	822.32	1	0	1	81	1	0	1	1	3	3	1	0	18.51	2	0	0
46846	33	36	10	3.57	85	4.72	4.9	291.5	0.6	53.04	2	78	3	1	1.09	10395.6	91.82	59.5	154.2	25.02	94	5.2	54	1.4	183	4.73	137	1.547	102	2.638	0.6	7	8.57	1	0	1	78	0	0	2	1	1	1	1	0	11.7	2	1	1
1244	31	19	14	5	115	6.384	4.9	291.5	0.9	79.6	1	66	1	2	2.44	883.602	94.19	100.7	162.7	38.04	130.4	5.9	37	0.96	210	5.43	284	3.21	116	3	80.9	173	46.76	1	1	1	88	1	0	3	1	2	2	1	0	30	3	1	0
34608	28	24	10	3.57	104	5.77	4.6	273.6	0.8	70.72	2	45	1	4	5	23957.8	92.54	101.2	164.4	37.44	104.8	5.1	62	1.6	172	4.45	76	0.858	95	2.457	3.5	61	5.74	2	0	1	95	1	0	3	0	1	1	1	0	6.3	1	1	1
49419	28	28	13	4.64	102	5.66	6.9	410.4	0.72	63.65	2	70	1	1	2.04	10060.8	89.89	78.1	144.6	37.35	107.6	5.9	44	1.14	186	4.81	149	1.682	112	2.896	2.6	63	4.13	1	1	1	69	1	0	3	1	1	1	2	0	30	3	1	0
51973	28	29	19	6.78	93	5.16	8.3	493.7	1.14	100.78	1	46	3	5	4.54	92825.8	80.32	96.6	178.8	30.22	106.2	5.7	33	0.85	205	5.3	148	1.671	142	3.672	2.9	93	3.12	2	0	1	85	1	0	3	1	1	1	2	0	21.6	3	1	0
52625	28	36	10	3.57	90	5	3	178.4	0.45	39.78	2	61	1	2	1.09	5555.18	109.38	70.3	155.5	29.07	93.9	5.2	68	1.76	157	4.06	105	1.185	68	1.758	12.2	62	19.68	1	0	1	71	0	1	2	0	1	1	1	0	7.3	1	1	1
57382	28	25	19	6.78	97	5.38	5	297.4	0.97	85.75	1	61	3	3	1.58	51508.6	88.82	98.5	182.8	29.48	108.1	5.6	56	1.45	156	4.03	88	0.994	82	2.121	4.2	83	5.06	1	0	1	78	1	0	2	0	1	1	2	0	30	3	1	1
13654	26	19	10	3.57	92	5.107	4.5	267.7	0.7	61.88	1	45	1	1	1.61	5773.08	115.8	70.4	165	25.86	94.7	5.6	38	0.98	212	5.48	236	2.66	127	3.28	12.4	151	8.21	1	0	1	97	0	0	2	1	1	1	1	0	25.3	3	0	0
15618	26	26	17	6.07	135	7.494	5.7	339	0.9	79.56	1	69	1	4	5	3031.45	92.45	122.8	172.2	41.41	136	6.3	48	1.24	112	2.9	153	1.73	33	0.85	134.7	169	79.7	2	1	1	78	1	1	3	1	2	2	1	0	30	3	1	1
17072	26	25	15	5.36	113	6.273	5.3	315.2	0.8	70.72	2	80	3	4	1.24	9558.17	74.44	48.1	146.1	22.53	84.5	6.8	38	0.98	248	6.41	295	3.33	151	3.9	18.5	110	16.82	1	0	1	55	0	1	1	1	1	1	2	0	21.5	3	0	0
21619	26	31	14	5	97	5.38	4.9	291.5	0.7	61.88	2	81	3	3	2.97	19499.5	86.83	49.7	157.7	19.98	75.6	5.6	93	2.4	152	3.93	79	0.892	43	1.112	11.8	45	26.22	2	0	1	67	1	0	1	0	1	1	2	0	13.7	2	0	1
32294	26	32	6	2.14	157	8.72	3.5	208.2	0.5	44.2	2	77	3	3	2.5	53574.9	96.54	61	150.9	26.79	94.5	7.6	62	1.6	145	3.75	120	1.355	59	1.526	38.5	111	34.68	1	0	1	62	0	1	2	0	2	2	1	0	15.9	2	1	1
41501	26	23	18	6.43	157	8.72	6.5	386.6	1.02	90.17	1	70	3	1	4.6	31035.5	79.07	114.8	177.9	36.27	132	6.3	48	1.24	158	4.09	167	1.885	77	1.991	12	189	6.35	1	0	1	68	1	1	3	1	1	1	2	0	30	3	1	1
46522	26	24	13	4.64	107	5.94	5.5	327.1	0.67	59.23	2	61	3	4	5	84303	99.38	79.4	159.8	31.09	106.3	5	38	0.98	173	4.47	194	2.19	96	2.483	17	89	19.1	2	0	1	79	1	0	3	1	1	1	1	0	15.9	2	1	0
6661	26	19	18	6.4	148	8.215	8.1	481.8	0.6	53	2	63	3	3	1.1	23684.4	100.8	115.8	164.4	42.85	121.3	7	30	0.78	194	5.02	380	4.29	88	2.28	7	107	6.54	1	0	1	82	0	1	3	1	1	1	1	0	27.5	3	1	0
11960	25	20	16	5.71	106	5.884	5.8	345	0.9	79.56	1	60	3	5	5	23818.2	97.78	89.1	178.9	27.84	101.5	5.6	69	1.78	232	6	67	0.76	150	3.88	9	177	5.08	2	0	1	73	1	0	2	0	1	1	1	0	29.4	3	0	1
21090	25	27	9	3.21	90	5	6.7	398.5	1.1	97.24	1	56	4	2	5	22420.2	78.79	69.7	162.3	26.46	91.6	4.8	63	1.63	151	3.9	156	1.761	57	1.474	22.6	259	8.73	2	0	1	90	0	0	2	1	1	1	2	0	9.4	1	0	1
10189	24	23	8	2.86	83	4.607	3.9	232	0.7	61.88	2	44	2	4	1.27	21042.2	109.3	74	165	27.18	94.6	5.3	63	1.63	196	5.07	199	2.25	93	2.4	21	140	15	1	0	1	84	0	0	2	1	1	1	1	0	4.5	1	1	1
23815	24	23	16	5.71	110	6.11	6.4	380.7	0.8	70.72	1	65	1	1	0.95	3831.9	98.21	114.2	172.2	38.51	120.4	6.4	37	0.96	152	3.93	159	1.795	83	2.146	2.1	65	3.23	2	0	1	79	1	0	3	1	1	1	1	0	30	3	1	0
30858	24	26	12	4.28	78	4.33	5.3	315.2	1	88.4	2	75	5	4	0.97	34235.2	58.75	83.6	161.9	31.89	103.8	6.3	39	1.01	133	3.44	185	2.089	57	1.474	1.4	13	10.77	1	1	1	71	1	1	3	1	1	2	3	1	21.5	3	1	0
35741	24	15	11	3.93	93	5.16	6	356.9	1.1	97.24	1	30	3	3	3.73	60628.2	92.61	117.8	170	40.76	119.6	5.8	51	1.32	161	4.16	110	1.242	88	2.276	11.8	185	6.38	1	0	1	83	1	0	3	0	1	1	1	0	4.7	1	1	1
51112	24	20	8	2.86	89	4.94	7.3	434.2	0.92	81.33	1	25	4	3	4.84	24763.2	118.39	148.1	180.8	45.31	130.4	5.5	42	1.09	300	7.76	129	1.456	232	6	24.3	524	4.64	2	0	1	56	0	0	3	0	1	1	1	0	5.6	1	1	1
57229	24	22	15	5.36	99	5.5	6.2	368.8	0.73	64.53	2	60	5	4	5	62510.5	94.09	51.4	151.6	22.36	80.2	5.5	50	1.29	256	6.62	167	1.885	173	4.474	4.1	62	6.61	1	0	1	81	1	0	1	1	1	1	1	0	11.7	2	0	1
64904	24	23	12	4.28	82	4.55	4.7	279.6	0.77	68.07	2	52	3	4	1.7	34802.1	92.76	73.5	160.1	28.7	106.2	5.5	91	2.35	224	5.79	78	0.881	117	3.026	31.9	114	27.98	2	0	1	89	0	0	2	0	1	1	1	0	7.3	1	1	1
11782	23	18	10	3.57	90	4.996	3.9	232	0.6	53.04	2	32	3	4	1.93	32784.4	122.23	93.6	164.7	34.51	110.2	5.3	45	1.16	259	6.7	151	1.7	184	4.76	4.9	107	4.58	2	0	1	84	0	0	3	1	1	1	1	0	5.3	1	1	0
15873	23	26	19	6.78	99	5.495	6.1	362.8	1.4	123.76	1	81	3	4	4.58	7138.09	50.49	89.4	176	28.86	108.3	5.6	66	1.71	185	4.78	147	1.66	90	2.33	21.7	56	38.75	2	1	1	68	1	0	2	1	2	3	3	1	30	3	1	1
30859	23	27	13	4.64	97	5.38	5.6	333.1	1	88.4	2	65	3	4	3.74	46278.1	62.52	68	170.3	23.45	89.2	5.3	52	1.34	257	6.65	275	3.105	150	3.879	15.7	232	6.77	2	0	1	74	0	0	1	1	1	1	2	0	18.51	2	1	1
35067	23	23	11	3.93	117	6.49	6.4	380.7	0.8	70.72	1	54	5	4	3.57	84585.4	105.17	133.8	175.1	43.64	136.5	5.6	52	1.34	228	5.9	209	2.36	134	3.465	6	70	8.57	2	0	1	63	1	0	3	1	1	1	1	0	15.6	2	1	1
4399	23	24	16	5.7	88	4.885	5.3	315.2	0.8	70.7	1	75	3	1	2.67	14203	92.29	80.7	167.3	28.83	101.5	5.2	41	1.06	185	4.78	133	1.5	118	3.05	22.9	135	16.96	2	0	1	66	0	0	2	0	1	1	1	0	30	3	0	1
56652	23	29	18	6.43	134	7.44	6.1	362.8	1.93	170.61	1	62	1	1	0.66	9286.36	38.66	88.1	179.1	27.47	106.1	7.2	50	1.29	174	4.5	199	2.247	84	2.172	48.1	88	54.66	2	0	1	91	0	1	2	1	2	4	4	1	30	3	1	1
61717	23	21	18	6.43	91	5.05	8.2	487.7	1.1	97.24	1	59	3	5	5	88102.8	77.33	123.8	176.6	39.7	127	5.7	35	0.91	193	4.99	336	3.793	91	2.353	5.7	163	3.5	2	0	1	75	1	0	3	1	1	1	2	0	30	3	1	0
10306	22	24	10	3.57	99	5.495	5.2	309.3	1	88.4	1	59	3	5	4.43	34926.9	86.7	80.9	176.4	26	87.5	5.3	71	1.84	191	4.94	62	0.7	108	2.79	7.3	116	6.29	2	0	1	81	1	0	2	0	1	1	2	0	11.2	2	0	1
30829	22	15	13	4.64	128	7.11	6.5	386.6	0.9	79.56	1	64	3	1	1.92	45255.8	95.37	80.4	165.2	29.46	104.6	5.9	37	0.96	207	5.35	151	1.705	140	3.62	20.3	192	10.57	2	0	1	71	1	1	2	1	1	1	1	0	30	3	1	0
37218	22	30	16	5.71	135	7.49	4.4	261.7	0.8	70.72	2	80	3	2	1.22	34693	74.44	89.5	148	40.86	124.4	6.3	47	1.22	181	4.68	310	3.5	72	1.862	103.8	182	57.03	1	0	1	70	1	1	3	1	2	2	2	1	21.5	3	1	0
40005	22	22	7	2.5	116	6.44	5.9	350.9	1	88.4	1	70	1	3	1.95	7101.45	80.97	79.1	165.7	28.81	103.8	4.9	45	1.16	236	6.1	251	2.834	141	3.646	3.3	80	4.13	2	0	1	75	1	0	2	1	1	1	2	0	30	3	1	1
8674	22	21	15	5.4	111	6.162	7	416.4	1.2	106.1	1	60	4	1	2.17	6190.02	69.23	94.7	182.6	28.4	105.3	6.3	60	1.54	189	4.89	97	1.1	110	2.84	33.4	222	15.05	2	0	1	83	1	0	2	0	1	1	2	0	29.4	3	1	1
22024	21	23	46	16.42	86	4.77	8.3	493.7	1.4	123.76	2	71	3	3	2.89	43347.9	40.22	80.1	155.7	33.04	102	5.7	45	1.16	169	4.37	173	1.953	89	2.302	1.6	133	1.2	2	0	1	52	1	0	3	1	1	3	4	1	30	3	1	0
28586	21	21	11	3.93	97	5.38	8.8	523.4	0.8	70.72	1	69	1	1	1.65	4346.33	95.8	107	172.1	36.13	116	5.9	46	1.19	137	3.54	110	1.242	69	1.784	54	259	20.85	1	0	1	75	1	0	3	0	1	1	1	0	30	3	1	1
38786	21	19	12	4.28	100	5.55	4.1	243.9	0.9	79.56	1	45	5	1	2.61	71827.3	107.34	80.2	169.7	27.85	102.4	5.8	36	0.93	224	5.79	225	2.54	143	3.698	6.4	125	5.12	2	0	1	99	1	0	2	1	1	1	1	0	25.3	3	1	0
44129	21	22	10	3.57	310	17.21	3.7	220.1	0.52	45.97	2	51	2	4	1.66	8957.27	112.42	70.1	163.6	26.19	95.5	13.2	43	1.11	218	5.64	146	1.648	146	3.776	66.9	72	92.92	2	0	1	89	0	1	2	1	2	2	1	0	7.3	1	1	0
47272	21	34	14	5	94	5.22	6.9	410.4	1.22	107.85	1	78	3	5	3.85	28110	60.68	68.7	160.2	26.77	101.4	5.3	34	0.88	170	4.4	151	1.705	106	2.741	39.5	246	16.06	2	0	1	56	1	0	2	1	1	1	2	0	30	3	0	0
47388	21	19	9	3.21	112	6.22	4.6	273.6	0.65	57.46	2	63	1	1	1.28	3971.67	98.87	72.9	162.6	27.57	102.4	7.6	37	0.96	179	4.63	61	0.689	130	3.362	492.5	46	1070.65	2	0	1	67	1	1	2	0	3	3	1	0	15.9	2	1	0
10	20	26	13	4.6	87	4.829	6	356.9	0.9	79.6	1	43	4	3	2.79	10607.5	108.68	111.8	190.1	30.94	108	5.5	51	1.31	140	3.62	45	0.51	80	2.07	11.1	279	3.98	2	0	1	96	0	0	3	0	1	1	1	0	9.4	1	1	1
15225	20	15	19	6.78	118	6.55	4.9	291.5	0.9	79.56	1	53	3	4	5	30344.9	102.13	97.2	180.1	29.97	106	5.3	46	1.19	227	5.87	49	0.55	171	4.42	28.5	165	17.27	2	0	1	61	1	0	2	0	1	1	1	0	29.4	3	1	1
20029	20	21	8	2.86	89	4.94	4.5	267.7	0.9	79.56	1	28	1	1	2.82	10011.5	119.31	77.2	178	24.37	81.2	5.3	51	1.32	203	5.25	180	2.03	116	3	1.3	30	4.33	2	0	1	76	0	0	1	1	1	1	1	0	5.6	1	0	1
24420	20	28	10	3.57	102	5.66	6.5	386.6	0.9	79.56	1	72	3	3	1.98	16725.8	90.74	86.5	183.2	25.77	107.5	6.1	41	1.06	227	5.87	178	2.01	150	3.879	7.2	142	5.07	2	0	1	72	1	0	2	1	1	1	1	0	30	3	1	1
33161	20	19	9	3.21	92	5.11	7.4	440.2	0.9	79.56	1	33	4	3	1.62	24469.4	115.65	143.2	174.7	46.92	128.3	5.5	40	1.03	198	5.12	137	1.547	131	3.388	6.3	136	4.63	2	0	1	97	0	0	3	1	1	1	1	0	6.7	1	1	1
37373	20	26	26	9.28	165	9.16	9.4	559.1	1.9	167.96	2	77	3	3	2.27	47859.1	26.86	84.2	159.1	33.26	106.5	7.8	90	2.33	153	3.96	113	1.276	40	1.034	23	40	57.5	1	1	1	47	0	1	3	0	2	4	5	1	13.7	2	1	1
48203	20	21	13	4.64	93	5.16	5.3	315.2	1.04	91.94	1	54	3	2	1.44	24855.9	85.33	81.5	181.5	24.74	92.8	5.8	56	1.45	214	5.53	134	1.513	131	3.388	6.7	165	4.06	2	0	1	90	1	0	1	0	1	1	2	0	21.6	3	0	1
6732	20	16	17	6.1	88	4.885	6.8	404.5	0.8	70.7	1	64	1	2	5	2326.22	98.83	85.1	170.5	29.27	108.3	5.6	68	1.76	226	5.84	165	1.86	125	3.23	10.8	112	9.64	2	0	1	87	0	0	2	1	1	1	1	0	29.4	3	1	1
9173	20	20	13	4.6	100	5.551	5.6	333.1	0.6	53	1	74	3	5	5	20660.5	101.3	116.7	186	33.73	123.4	5.5	91	2.35	221	5.72	67	0.76	117	3.03	3.9	46	8.48	2	0	1	79	1	0	3	0	1	1	1	0	30	3	1	1
11797	19	23	16	5.71	99	5.495	4.9	291.5	0.8	70.72	1	64	1	2	2.21	1689.56	98.83	74.2	166.4	26.8	99	5.48	47	1.22	216	5.59	114	1.29	146	3.78	11.9	107	11.12	2	0	1	89	1	0	2	0	1	1	1	0	30	3	0	1
17695	19	19	9	3.21	104	5.773	4.7	279.6	0.9	79.56	1	64	1	3	1.84	2684.84	95.37	102	174	33.69	117.6	6	37	0.96	177	4.58	145	1.64	111	2.87	50.4	117	43.08	2	0	1	80	1	0	3	1	2	2	1	0	30	3	1	0
23245	19	18	23	8.21	298	16.54	6.5	386.6	0.9	79.56	1	55	1	4	5	18049.4	100.86	72.7	159	28.76	100.7	11.2	59	1.53	295	7.63	222	2.506	192	4.965	1350	86	1569.77	2	1	1	67	0	1	2	1	3	3	1	0	29.4	3	0	1
28289	19	24	6	2.14	94	5.22	4.7	279.6	0.6	53.04	2	60	1	4	4.2	3744.37	102.69	79	157.1	32.01	88.1	5.7	73	1.89	217	5.61	160	1.806	112	2.896	2.8	35	8	1	0	1	91	1	0	3	1	1	1	1	0	11.7	2	1	1
42908	19	24	11	3.93	190	10.55	3.5	208.2	0.63	55.69	2	80	3	4	1.73	36470	89.62	57.1	144.4	27.38	88.8	5.9	56	1.45	227	5.87	136	1.535	144	3.724	2.1	27	7.78	1	0	1	42	1	0	2	1	1	1	2	0	13.7	2	1	1
47715	19	23	28	10	95	5.27	5.8	345	0.65	57.46	2	80	3	3	5	40608.7	88.95	51.7	160.4	20.09	83.2	5.8	60	1.55	209	5.4	85	0.96	132	3.414	8.3	87	9.54	1	0	1	75	1	0	1	0	1	1	2	0	21.5	3	0	1
49754	19	26	6	2.14	97	5.38	4.9	291.5	0.72	63.65	2	70	4	1	0.59	13654	89.89	61.3	154.7	25.61	92.8	5.7	52	1.34	165	4.27	69	0.779	99	2.56	11.2	113	9.91	2	0	1	82	1	0	2	0	1	1	2	0	15.9	2	1	1
5018	19	18	15	5.4	93	5.162	5.4	321.2	0.8	70.7	1	66	2	1	0.84	12147.7	97.6	86.6	166.6	31.2	107.9	5.9	54	1.39	196	5.07	142	1.6	114	2.95	3.2	75	4.27	1	0	1	67	1	0	3	1	1	1	1	1	25.3	3	1	1
60034	19	26	10	3.57	108	6	7.7	458	0.74	65.42	1	56	2	1	1.34	19113.1	106.34	83.5	175	27.27	106.5	5.7	43	1.11	197	5.09	318	3.59	90	2.327	6	131	4.58	2	0	1	68	1	0	2	1	1	1	1	0	30	3	1	1
60761	19	27	8	2.86	92	5.11	5	297.4	0.69	61	2	61	4	3	5	21824.2	98.68	103.6	167.3	37.01	107	5.9	59	1.53	167	4.32	157	1.773	77	1.991	10.7	180	5.94	2	0	1	85	1	0	3	1	1	1	1	0	11.7	2	1	1
61501	19	20	8	2.86	174	9.66	4.2	249.8	0.51	45.08	2	46	1	1	1.08	14183	116.51	82.9	151.3	36.21	105.7	8.3	53	1.37	152	3.93	80	0.903	83	2.146	4.6	42	10.95	2	0	1	69	0	1	3	0	1	1	1	0	3.3	1	1	1
23166	18	18	15	5.36	93	5.16	5.6	333.1	0.9	79.56	2	70	3	1	2.15	40585.3	68.77	90	155	37.46	113.3	5.4	48	1.24	230	5.95	93	1.05	163	4.215	5.4	145	3.72	1	0	1	69	0	0	3	0	1	1	2	1	13.7	2	1	0
41725	18	26	10	3.57	95	5.27	4	237.9	0.82	72.49	2	77	3	3	1.05	30498	73.63	70.9	164	26.36	86.7	5.4	35	0.91	176	4.55	219	2.473	97	2.508	15.8	76	20.79	1	0	1	17	1	0	2	1	1	1	2	0	15.9	2	0	0
45491	18	20	25	8.93	153	8.49	5.4	321.2	1.2	106.08	1	78	3	1	3.36	31524.1	61.9	78.9	174	26.06	93.6	8.9	43	1.11	164	4.24	165	1.863	88	2.276	2200	104	2115.38	1	1	1	77	0	1	2	1	3	3	2	1	30	3	0	1
4716	18	17	9	3.2	96	5.329	7.4	440.2	0.6	53	2	25	3	5	0.61	27745	127.67	121.4	171.2	41.42	113	5.2	62	1.61	238	6.15	286	3.23	118	3.05	15.2	206	7.38	2	0	1	83	0	0	3	1	1	1	1	0	1.7	1	1	1
50450	18	20	13	4.64	159	8.83	5.3	315.2	0.82	72.49	2	66	4	4	2.07	11318.9	78.84	97.5	166.2	35.3	107.6	7.5	70	1.81	200	5.17	113	1.276	107	2.767	40.8	129	31.63	1	0	1	67	0	1	3	0	2	2	2	1	11.7	2	1	1
57343	18	19	9	3.21	168	9.33	4.7	279.6	0.83	73.37	1	58	4	4	2.47	20544.8	101.45	110.3	171.4	37.55	118.4	7.7	41	1.06	212	5.48	89	1.005	153	3.957	14.4	222	6.49	2	0	1	81	0	1	3	0	1	1	1	0	21.6	3	1	1
58567	18	22	10	3.57	104	5.77	6.2	368.8	0.85	75.14	1	67	3	3	0.82	18242.6	95.24	81.2	167.4	28.98	110.2	6	53	1.37	223	5.77	150	1.694	140	3.62	99.1	136	72.87	2	1	1	76	1	0	2	1	2	2	1	0	30	3	1	1
58998	18	27	23	8.21	77	4.27	4.7	279.6	0.97	85.75	2	80	3	4	3.85	33429.8	59.07	57.2	145.3	27.09	90.2	6.1	66	1.71	200	5.17	192	2.168	96	2.483	25.3	88	28.75	2	1	1	60	1	1	2	1	1	2	3	1	10	2	1	1
59038	18	20	15	5.36	92	5.11	3	178.4	0.51	45.08	2	62	1	1	1.78	8526.03	105.48	69.9	151.3	30.54	103.5	6	55	1.42	171	4.42	61	0.689	104	2.689	3.4	31	10.97	1	0	1	69	1	0	3	0	1	1	1	0	7.3	1	1	1
63385	18	24	10	3.57	93	5.16	3.4	202.2	0.67	59.23	2	62	4	4	2.15	15369.2	98.76	86.8	161.5	33.3	106.8	5.1	87	2.25	270	6.98	77	0.869	168	4.344	4.5	81	5.56	2	0	1	79	1	0	3	0	1	1	1	0	7.3	1	1	1
26638	17	17	15	5.36	89	4.94	2.4	142.8	0.8	70.72	2	65	3	3	1.28	28444.9	81.72	80	167.1	28.65	92.3	5.3	55	1.42	184	4.76	69	0.779	115	2.974	1.8	69	2.61	2	0	1	66	0	0	2	0	1	1	2	0	7.3	1	1	1
38063	17	18	16	5.71	101	5.61	5.7	339	1	88.4	1	71	3	3	3.79	48021	80.47	84.6	184.3	24.91	98.9	5.6	45	1.16	169	4.37	93	1.05	105	2.715	9.5	195	4.87	2	0	1	75	1	0	1	0	1	1	2	0	30	3	0	1
41513	17	27	24	8.57	113	6.27	5.8	345	1.1	97.24	2	80	2	1	1.34	7863.56	50.8	42.6	137.9	22.4	78.2	6	67	1.73	215	5.56	135	1.524	121	3.129	33.3	100	33.3	2	0	1	55	1	0	1	1	2	3	3	1	11.7	2	0	1
48156	17	19	16	5.71	99	5.5	6.2	368.8	0.9	79.56	2	57	3	5	3.93	115775	74.57	78.6	159.7	30.82	101.6	5	50	1.29	223	5.77	128	1.445	147	3.801	10.1	151	6.69	2	0	1	81	1	0	3	0	1	1	2	0	13.7	2	1	1
49193	17	19	13	4.64	93	5.16	5.6	333.1	0.97	85.75	1	64	1	4	5	9618.8	87.17	89.7	165.8	32.63	104	5.5	54	1.4	170	4.4	125	1.411	91	2.353	12	137	8.76	2	0	1	83	0	1	3	0	1	1	2	0	30	3	1	1
49897	17	18	14	5	95	5.27	6.7	398.5	0.72	63.65	2	29	4	3	1.46	27984.8	116	150.9	158	60.45	154	5.6	49	1.27	292	7.55	32	0.361	237	6.129	2.7	58	4.66	1	0	1	66	1	0	3	0	1	1	1	0	3.3	1	1	0
8784	17	22	12	4.3	105	5.829	4.5	267.7	0.5	44.2	2	68	1	1	1.16	1177.92	102.1	89.8	153.6	38.06	117.2	5.8	35	0.91	240	6.21	170	1.92	171	4.42	1.5	17	8.82	1	0	1	92	1	0	3	1	1	1	1	0	24.8	3	1	0
16676	16	21	25	8.93	106	5.884	6.6	392.6	1.9	167.96	1	82	3	3	2.6	9352.74	34.79	77.6	163.7	28.96	102.5	5.5	39	1.01	240	6.21	352	3.97	131	3.39	20.3	85	23.88	2	0	1	67	1	0	2	1	1	3	4	1	30	3	1	0
2225	16	18	14	5	312	17.319	5.6	333.1	0.5	44.2	2	62	1	2	5	2129.53	105.98	69.9	157.1	28.32	96.7	10.5	45	1.18	213	5.51	247	2.79	118	3.05	30.3	59	51.36	1	0	1	76	0	1	2	1	2	2	1	0	18.51	2	1	0
43250	16	31	5	1.79	81	4.5	4.3	255.8	1.02	90.17	1	20	4	3	2	23901.5	107.9	72.9	186.9	20.87	78.2	5.5	80	2.07	146	3.78	120	1.355	42	1.086	20.1	260	7.73	2	0	1	78	0	0	1	0	1	1	1	0	1.6	1	0	1
58151	16	21	16	5.71	108	6	6.2	368.8	1.02	90.17	1	64	3	2	0.76	17669.7	82.07	85.4	179	26.65	105.4	5.5	104	2.69	257	6.65	78	0.881	137	3.543	157.5	42	375	1	0	1	75	1	0	2	0	3	3	2	1	30	3	1	1
63700	16	16	19	6.78	67	3.72	5.3	315.2	1.21	106.96	1	40	4	3	2.19	17602.1	77.62	103.5	180	31.9	109	10.5	43	1.11	182	4.71	68	0.768	125	3.233	190	234	81.2	2	0	1	97	0	1	3	0	2	2	2	1	11.2	2	1	1
3291	15	22	10	3.6	108	5.995	5.3	315.2	0.5	44.2	2	80	3	3	2.25	10061.7	94.76	57.6	146.8	26.73	86.1	5.6	75	1.93	213	5.51	97	1.1	119	3.08	4.4	66	6.67	2	0	1	45	1	0	2	0	1	1	1	0	11.7	2	0	1
41693	15	15	11	3.93	80	4.44	6.7	398.5	1.09	96.36	1	50	4	4	5	18724.1	82.68	127.3	190.4	35.12	124.4	5.6	38	0.98	190	4.91	92	1.039	134	3.465	7.1	226	3.14	2	0	1	83	0	0	3	0	1	1	2	0	25.3	3	1	0
47874	15	29	17	6.07	119	6.61	5.1	303.3	0.82	72.49	2	79	3	3	1.12	22147.6	72.72	50.5	157.5	20.36	74	5.9	87	2.25	243	6.28	70	0.79	142	3.672	6.6	29	22.76	1	0	1	62	1	1	1	0	1	1	2	0	30	3	0	1
50113	15	22	20	7.14	109	6.05	5.9	350.9	1.12	99.01	1	80	3	3	1.28	10846.5	66.41	57.7	163.9	21.48	83	5.7	55	1.42	183	4.73	68	0.768	114	2.948	27.2	143	19.02	2	0	1	61	1	0	1	0	1	1	2	0	30	3	0	1
51175	15	19	9	3.21	94	5.22	4.4	261.7	0.82	72.49	1	63	3	3	2.76	49593.5	98.7	71	183.4	21.11	84	5.3	52	1.34	170	4.4	83	0.937	101	2.612	6.6	100	6.6	1	0	1	89	1	0	1	0	1	1	1	0	29.4	3	0	1
6734	15	21	10	3.6	94	5.218	6.6	392.6	0.8	70.7	1	71	4	1	1.29	6456.37	94.62	66.9	179.5	20.76	86.3	5.1	48	1.23	153	3.96	102	1.15	85	2.2	15.9	146	10.89	2	0	1	68	0	0	1	0	1	1	1	0	30	3	0	1
7780	15	22	8	2.9	93	5.162	5.7	339	0.7	61.9	1	20	4	4	0	17472.2	135.28	68.4	168.1	24.21	73.1	5.6	47	1.21	207	5.35	78	0.88	145	3.75	16.9	428	3.95	2	0	1	65	0	0	1	0	1	1	1	0	3.3	1	0	1
33337	14	13	10	3.57	143	7.94	4.2	249.8	0.5	44.2	2	68	4	1	1.51	11370.2	102.1	101	164.9	37.14	114	6.7	83	2.15	208	5.38	56	0.632	114	2.948	7	68	10.29	2	1	1	56	0	1	3	0	1	1	1	0	13.7	2	1	1
38905	14	17	9	3.21	73	4.05	3.3	196.3	0.7	61.88	2	38	4	4	3.54	26043.8	113.46	69.2	168.7	24.32	76.8	5	93	2.4	218	5.64	30	0.339	119	3.077	18.6	204	9.12	2	0	1	80	0	0	1	0	1	1	1	0	3.9	1	0	1
45663	14	14	13	4.64	123	6.83	3.4	202.2	0.45	39.78	2	46	1	2	1.73	23522.5	120.08	68.3	150.8	30.03	98.7	7.7	50	1.29	273	7.06	146	1.648	194	5.017	95.8	53	180.75	1	0	1	90	0	1	3	1	2	2	1	0	10	2	1	1
55998	14	25	30	10.71	80	4.44	3.8	226	1.06	93.7	2	80	3	4	1.75	26699.3	53.11	48.4	147	22.4	85	5.8	67	1.73	167	4.32	81	0.914	84	2.172	7.1	62	11.45	2	0	1	52	1	0	1	0	1	2	3	1	15.9	2	0	1
58527	14	28	22	7.85	78	4.33	4.4	261.7	1.02	90.17	2	80	3	3	1.11	34155.1	55.61	47.1	158.9	18.65	75.5	5.5	69	1.78	174	4.5	79	0.892	89	2.302	5.6	103	5.44	1	0	1	69	0	0	1	0	1	2	3	1	10	2	0	1
47068	13	23	42	14.99	213	11.82	3.6	214.1	7.8	689.52	2	62	4	2	1.15	10072.4	5.42	64.7	164.6	23.88	91.5	8.7	91	2.35	214	5.53	153	1.727	92	2.379	1964	71	2766.2	2	1	1	53	0	1	1	1	3	4	6	1	11.7	2	1	1
52660	13	16	22	7.85	145	8.05	5.4	321.2	0.8	70.72	2	62	1	3	2.4	4997.01	83.26	66.4	153.8	28.07	100	6.7	38	0.98	235	6.08	257	2.902	146	3.776	3	34	8.82	2	0	1	76	0	1	2	1	1	1	2	0	27.5	3	1	0
13769	12	18	4	1.43	96	5.329	5.4	321.2	0.6	53.04	2	42	4	3	1.18	12651.4	114.86	81.7	161	31.52	97	5	53	1.37	145	3.75	50	0.56	82	2.12	7.8	172	4.53	2	0	1	93	0	0	3	0	1	1	1	0	4.5	1	1	1
64390	12	16	10	3.57	96	5.33	3.2	190.3	0.5	44.2	2	45	4	3	0.78	18494.2	117.8	92.8	164.8	34.2	100.9	5.4	45	1.16	181	4.68	120	1.355	112	2.896	12.8	157	8.15	2	0	1	89	0	1	3	0	1	1	1	0	13.7	2	1	0
17242	11	18	20	7.14	103	5.718	5.3	315.2	1.1	97.24	1	83	3	4	2.03	11395.6	66.61	54.1	153.5	22.96	84.1	6	47	1.22	235	6.08	96	1.08	169	4.37	28.5	193	14.77	2	0	1	63	1	0	1	0	1	1	2	0	30	3	0	1
52422	11	17	26	9.28	153	8.49	9	535.3	1.72	152.05	1	70	1	1	0.92	7996.9	42.24	77	157.7	30.96	107	7.9	44	1.14	179	4.63	329	3.714	69	1.784	943	134	703.73	1	1	1	68	0	1	3	1	3	4	4	1	30	3	1	1
54633	10	25	26	9.28	95	5.27	8.2	487.7	2.11	186.52	2	80	3	4	2.2	31907.4	23.25	63.9	150.9	28.06	98.5	5.5	42	1.09	196	5.07	193	2.179	115	2.974	412	48	858.33	2	0	1	63	0	0	2	1	3	4	5	1	30	3	1	0
59427	10	17	9	3.21	86	4.77	6	356.9	1.01	89.28	1	54	3	2	3.4	24217.1	88.38	78.5	191.2	21.47	96.1	5.5	30	0.78	220	5.69	209	2.36	148	3.827	23.4	161	14.53	1	1	1	70	0	0	1	1	1	1	2	0	30	3	0	0
54306	84	71	17	6.07	98	5.44	9.5	565.1	0.69	61	1	39	1	5	1.59	30891	120.73	137.3	177.2	43.73	127.3	5.8	29	0.75	142	3.67	76	0.858	98	2.534	1.8	65	2.77	1	0	1	90	1	0	3	0	1	1	1	0	6.7	1	1	0
7517	55	34	17	6.1	101	5.607	12.2	725.7	0.8	70.7	1	37	3	3	1.07	40805.2	116.9	136.4	186.5	39.22	138.5	6.7	24	0.63	143	3.7	114	1.29	96	2.48	52.5	181	29.01	2	0	1	99	1	1	3	0	1	1	1	0	6.7	1	1	0
54245	53	47	8	2.86	98	5.44	5.7	339	0.89	78.68	1	65	4	5	2.75	9254.22	95.1	90.4	171.3	30.81	109.7	5.4	51	1.32	177	4.58	77	0.869	111	2.87	1283	135	950.37	2	0	1	67	0	0	3	0	3	3	1	0	18.4	2	1	1
56332	48	36	8	2.86	94	5.22	6.3	374.7	0.91	80.44	1	36	3	2	0.3	14719.8	112.02	114.3	178.3	35.95	115.8	5.5	32	0.83	200	5.17	350	3.952	98	2.534	10.6	232	4.57	1	0	1	85	0	0	3	1	1	1	1	0	15.6	2	1	0
12880	47	31	17	6.07	125	6.939	7.1	422.3	1.3	114.92	1	77	3	2	2.18	15154.3	56.58	66.9	172.1	22.59	91	5.3	100	2.59	180	4.65	63	0.71	67	1.73	17.6	147	11.97	2	0	1	67	0	1	1	0	1	2	3	1	30	3	0	1
41549	46	58	12	4.28	89	4.94	5.1	303.3	0.68	60.11	2	61	4	3	0.29	17473.7	99.02	107.6	175.3	35.01	124.7	5.3	56	1.45	191	4.94	112	1.264	113	2.922	7.2	213	3.38	2	0	1	69	0	0	3	0	1	1	1	0	11.7	2	1	1
28254	45	28	8	2.86	105	5.83	6.2	368.8	1	88.4	1	35	3	2	1.21	42636.6	100.66	131.9	171.8	44.69	131.4	5.2	33	0.85	179	4.63	130	1.468	120	3.103	1001	289	346.37	1	0	1	91	1	0	3	0	3	3	1	0	5.6	1	1	0
61215	40	30	10	3.57	110	6.11	7.9	469.9	1.06	93.7	1	43	4	3	2.95	20561.7	89.3	102.5	177.5	32.53	100	5.5	41	1.06	127	3.28	263	2.969	33	0.853	16.6	156	10.64	2	0	1	76	1	0	3	1	1	1	2	0	13.3	2	0	1
64497	38	30	16	5.71	107	5.94	6.9	410.4	1.49	131.72	1	60	3	1	1.39	25495	53.39	89.9	165.7	32.7	112.1	6	51	1.32	398	10.29	284	3.206	290	7.499	9.2	147	6.26	1	1	1	94	1	1	3	1	1	2	3	1	30	3	1	1
59546	34	36	6	2.14	90	5	9.5	565.1	0.76	67.18	1	49	1	3	2.7	18775.6	110.18	91.5	163.5	34.23	112.6	5.2	52	1.34	286	7.4	235	2.653	187	4.836	160.3	63	254.44	2	0	1	91	0	0	3	1	2	2	1	0	13.3	2	1	1
58592	31	29	18	6.43	92	5.11	6.9	410.4	1.84	162.66	1	71	4	3	2.77	11804.6	38.71	93.9	175.4	30.52	104.1	5.6	50	1.29	182	4.71	142	1.603	104	2.689	15.1	165	9.15	1	1	1	78	0	0	3	1	1	3	4	1	30	3	1	1
60241	31	25	8	2.86	86	4.77	4.9	291.5	0.93	82.21	2	64	4	2	0.54	14695.5	68.63	77.1	160.4	29.97	104	5.6	58	1.5	262	6.78	207	2.337	163	4.215	5.6	100	5.6	2	0	1	79	0	0	2	1	1	1	2	0	24.8	3	1	1
19154	30	32	11	3.93	98	5.44	5.7	339	1.1	97.24	1	60	5	4	1.32	6024.8	76.85	94.8	184.5	27.85	95.8	5.4	42	1.09	302	7.81	157	1.77	229	5.92	5.6	75	7.47	1	0	1	91	0	0	2	1	1	1	2	0	30	3	0	1
22972	30	32	23	8.21	79	4.39	6.3	374.7	1.1	97.24	1	24	1	2	1.5	26176.5	96.14	80.9	172.9	27.06	90.3	5.3	41	1.06	113	2.92	110	1.242	50	1.293	13	150	8.67	2	0	1	46	0	0	2	0	1	1	1	0	5.6	1	0	1
38055	30	29	15	5.36	109	6.05	5	297.4	1	88.4	1	55	3	2	4.24	89650.9	88.88	101.8	175.5	33.05	117.7	5.3	99	2.56	233	6.03	54	0.61	123	3.181	14.1	79	17.85	2	0	1	79	1	0	3	0	1	1	2	0	25.3	3	1	1
50487	30	24	19	6.78	163	9.05	4.5	267.7	0.82	72.49	1	54	1	2	2.49	13811.7	104.39	77.5	164	28.81	97	7.1	42	1.09	159	4.11	229	2.585	71	1.836	9.8	117	8.38	1	0	1	79	0	1	2	1	1	1	1	0	18.4	2	0	1
3690	29	48	10	3.6	104	5.773	7	416.4	1	88.4	1	69	4	4	2.98	3543.4	81.47	82.8	171.1	28.28	102.2	7.3	42	1.08	151	3.9	124	1.4	115	2.97	67.4	75	89.87	1	0	1	79	1	1	2	0	2	2	2	1	30	3	1	1
11579	28	27	12	4.28	118	6.55	7.3	434.2	0.9	79.56	1	55	3	4	3.35	34926.9	100.86	138.6	185.7	40.19	132	5.7	33	0.85	186	4.81	199	2.25	113	2.92	11.6	88	13.18	2	0	1	75	1	1	3	1	1	1	1	0	29.4	3	1	0
1276	28	30	16	5.7	102	5.662	7	416.4	1.1	97.2	2	70	4	4	2.95	7111.25	54.06	73.1	162.9	27.55	93.3	6.3	43	1.11	127	3.28	97	1.1	65	1.68	1.2	44	2.73	1	1	1	68	1	0	2	0	1	2	3	1	27.5	3	1	0
58291	28	20	14	5	113	6.27	8.1	481.8	1	88.4	1	43	4	4	5	24644	95.77	128.9	173.2	42.97	135.4	6.5	53	1.37	215	5.56	85	0.96	145	3.75	8.4	232	3.62	2	0	1	85	1	1	3	0	1	1	1	0	18.4	2	1	1
48200	27	29	11	3.93	101	5.61	7.3	434.2	0.82	72.49	1	55	3	2	1.18	22515.4	103.74	81.4	175.2	26.52	99.4	5.5	47	1.22	236	6.1	150	1.694	159	4.112	8.3	141	5.89	2	0	1	85	1	0	2	1	1	1	1	0	25.3	3	0	1
49522	27	22	13	4.64	88	4.88	5.3	315.2	0.62	54.81	2	54	1	4	2.35	16965.2	105.76	80.6	159.2	31.8	107.8	5.6	57	1.47	221	5.72	126	1.423	139	3.595	8.7	128	6.8	2	0	1	93	0	0	3	0	1	1	1	0	10	2	1	1
10101	26	16	6	2.14	249	13.822	4.8	285.5	0.7	61.88	1	68	4	5	1.28	3500.29	100.36	83.3	177.5	26.44	105	7.9	65	1.68	145	3.75	101	1.14	60	1.55	3.9	60	6.5	1	0	1	87	0	1	2	0	1	1	1	0	25.3	3	1	1
41269	26	31	8	2.86	146	8.1	8	475.8	0.6	53.04	2	64	4	3	1.02	9807.06	100.17	114.5	152.3	49.36	126.2	7.7	59	1.53	233	6.03	173	1.953	139	3.595	91.5	94	97.34	1	0	1	72	0	1	3	1	2	2	1	0	13.7	2	1	1
51497	26	19	12	4.28	251	13.93	6.5	386.6	0.82	72.49	2	54	3	3	0.5	32545.4	84.95	72.4	160.6	28.07	104.8	11	45	1.16	272	7.03	298	3.364	167	4.319	123.5	204	60.54	2	1	1	80	0	1	2	1	2	2	2	1	10	2	1	0
41702	25	21	13	4.64	107	5.94	4.9	291.5	0.82	72.49	2	55	4	3	3.43	22428.7	84.42	123.9	165.7	45.13	135.5	6.4	51	1.32	242	6.26	147	1.66	162	4.189	58.9	137	42.99	1	0	1	77	1	0	3	1	2	2	2	1	7.3	1	1	1
55907	25	26	18	6.43	88	4.88	5.4	321.2	0.7	61.88	2	57	1	2	2.26	12990.8	100.81	61.1	151.6	26.59	92.5	4.8	54	1.4	228	5.9	120	1.355	150	3.879	2	29	6.9	2	0	1	71	0	0	2	0	1	1	1	0	7.3	1	1	1
27092	24	21	12	4.28	99	5.5	5.6	333.1	1	88.4	1	78	1	3	1.29	3759.81	77.04	75.9	173.4	25.24	101.7	5.2	40	1.03	211	5.46	223	2.518	126	3.258	9.5	48	19.79	2	0	1	64	1	0	2	1	1	1	2	0	30	3	0	1
62539	24	29	9	3.21	114	6.33	5.9	350.9	1.26	111.38	1	60	4	2	0.92	10717.4	65.29	97.2	174.5	31.9	103.3	6.6	65	1.68	146	3.78	58	0.655	69	1.784	126.5	225	56.22	2	0	1	85	1	1	3	0	2	2	2	1	29.4	3	1	1
39616	23	24	16	5.71	98	5.44	5.6	333.1	0.7	61.88	2	49	5	5	2.71	26688.4	105.95	63.5	151.9	27.52	86.3	5.6	59	1.53	172	4.45	113	1.276	90	2.327	0.8	12	6.67	2	0	1	80	0	0	2	0	1	1	1	0	3.9	1	0	1
33971	22	22	9	3.21	111	6.16	3.5	208.2	0.8	70.72	2	64	3	3	0.23	70166.3	82.23	88	159.1	34.77	103.5	5.2	51	1.32	203	5.25	115	1.298	129	3.336	6.6	82	8.05	1	1	1	77	1	0	3	0	1	1	2	0	21.5	3	1	1
36194	22	21	12	4.28	118	6.55	6.1	362.8	0.7	61.88	2	46	3	3	5	117174	107.95	111.9	165.6	40.8	117.6	5.7	46	1.19	206	5.33	147	1.66	131	3.388	54.8	37	148.11	1	0	1	77	1	0	3	1	2	2	1	0	6.3	1	1	0
45553	22	21	17	6.07	74	4.11	4.2	249.8	0.86	76.02	2	68	3	4	4.64	36045.6	73.54	60.3	162.8	22.75	87.1	5.7	91	2.35	313	8.09	267	3.014	169	4.37	3.7	174	2.13	2	1	1	65	1	0	1	1	1	1	2	0	18.51	2	0	1
38433	21	24	12	4.28	143	7.94	9.2	547.2	1	88.4	2	72	4	3	3.11	15506.8	59.86	81.1	162.4	30.75	109.1	6.9	51	1.32	169	4.37	135	1.524	91	2.353	24.2	127	19.06	1	1	1	57	0	1	3	1	1	2	3	1	15.9	2	1	1
46069	21	25	18	6.43	105	5.83	5.5	327.1	1.22	107.85	2	74	3	3	1.43	22231.8	46.57	89	165.3	32.57	106.1	5.5	49	1.27	202	5.22	205	2.314	112	2.896	17.6	194	9.07	1	0	1	73	1	0	3	1	1	2	3	1	21.5	3	1	0
46914	21	26	16	5.71	90	5	6	356.9	1.12	99.01	1	44	2	3	0.35	16958.3	83.08	75.3	165.5	27.49	93.3	5	51	1.32	210	5.43	129	1.456	133	3.439	86.4	179	48.27	2	0	1	101	0	0	2	0	2	2	2	1	9.4	1	0	1
50364	21	23	18	6.43	83	4.61	4	237.9	0.72	63.65	2	46	4	4	0.62	25898.2	104.36	78.7	169.2	27.49	90.8	5.4	67	1.73	204	5.28	129	1.456	111	2.87	61.3	105	58.38	2	1	1	65	0	0	2	0	2	2	1	1	10	2	1	1
6472	21	23	23	8.2	88	4.885	4.9	291.5	0.6	53	2	67	3	4	3.86	28069.6	98.32	56.7	160.5	22.01	78.2	5.1	49	1.26	173	4.47	103	1.16	104	2.69	24.2	106	22.83	2	0	1	70	0	0	1	0	1	1	1	0	15.9	2	0	0
14506	20	21	20	7.14	95	5.273	5.8	345	1.1	97.24	1	60	3	5	5	21065.2	76.85	107.5	176.3	34.59	116.5	5	51	1.32	186	4.81	141	1.59	107	2.77	14.5	224	6.47	2	0	1	88	0	0	3	1	1	1	2	0	15.6	2	1	1
46109	20	22	13	4.64	90	5	5.2	309.3	0.96	84.86	1	31	3	5	5	65271.2	108.37	82.5	186.9	23.62	87.3	4.7	58	1.5	212	5.48	170	1.919	120	3.103	7.3	59	12.37	2	0	1	73	1	0	1	1	1	1	1	0	2.8	1	0	1
54439	20	24	13	4.64	122	6.77	7	416.4	0.63	55.69	1	63	1	1	2.08	6371.79	106.88	80.3	170.3	27.69	106.5	6.3	53	1.37	180	4.65	113	1.276	104	2.689	0.8	21	3.81	2	0	1	91	1	1	2	0	1	1	1	1	21.6	3	1	1
54802	20	26	19	6.78	78	4.33	5.1	303.3	1.18	104.31	1	60	3	5	1.28	18440.8	70.64	84.4	184.3	24.85	99.4	4.9	76	1.97	183	4.73	39	0.44	99	2.56	9.1	127	7.17	2	0	1	81	0	0	1	0	1	1	2	0	13.3	2	0	1
17365	19	19	14	5	126	6.994	5.5	327.1	0.8	70.72	1	74	1	5	2.83	994.798	92.87	105.6	165.7	38.46	117.6	6.6	40	1.03	157	4.06	262	2.96	65	1.68	152.2	122	124.75	2	0	1	79	0	1	3	1	2	2	1	0	29.4	3	1	1
17954	19	26	12	4.28	92	5.107	3.3	196.3	0.9	79.56	2	76	3	3	2.39	22227.8	66.26	59	163.2	22.15	79.4	4.9	82	2.12	245	6.34	60	0.68	151	3.9	4.9	73	6.71	1	0	1	68	1	0	1	0	1	1	2	0	21.5	3	0	1
19761	19	16	14	5	110	6.106	4.6	273.6	0.6	53.04	2	54	4	3	3.38	9414.39	106.6	111.7	170	38.65	116.5	6.6	38	0.98	161	4.16	73	0.82	108	2.79	7.1	112	6.34	2	0	1	76	1	1	3	0	1	1	1	0	18.51	2	1	0
31893	19	25	14	5	97	5.38	5.5	327.1	0.9	79.56	2	81	3	4	3.12	30563.7	64.23	64.8	161.1	24.97	91	5.2	84	2.17	243	6.28	157	1.773	128	3.31	10.9	72	15.14	2	0	1	82	0	0	1	1	1	1	2	0	13.7	2	1	1
37910	19	19	10	3.57	178	9.88	5.4	321.2	0.9	79.56	2	60	1	2	1.25	8473.24	73.19	100.1	160.6	38.81	123.2	8.2	49	1.27	141	3.65	113	1.276	69	1.784	104.5	133	78.57	2	0	1	70	0	1	3	0	2	2	2	1	18.51	2	1	0
6637	19	19	18	6.4	96	5.329	7.5	446.1	0.5	44.2	2	57	3	4	0.63	22310.8	109.33	107.9	151.9	46.76	128	5.5	47	1.21	210	5.43	119	1.34	139	3.59	4.7	136	3.46	2	0	1	74	0	0	3	0	1	1	1	0	21.5	3	1	0
56058	18	19	10	3.57	153	8.49	6.1	362.8	0.82	72.49	2	48	4	2	1.09	24835.6	88.18	115.4	158.3	46.05	124.6	5.5	44	1.14	176	4.55	68	0.768	118	3.051	29.6	156	18.97	2	0	1	81	0	0	3	0	1	1	2	0	7.3	1	1	0
7466	18	25	22	7.9	88	4.885	3.5	208.2	0.8	70.7	1	76	3	4	2.87	17962	91.72	70	177.1	22.32	90.9	5.2	43	1.11	192	4.97	84	0.95	132	3.41	1.9	46	4.13	1	0	1	21	0	0	1	0	1	1	1	0	30	3	0	1
40871	17	26	16	5.71	88	4.88	3.9	232	0.9	79.56	2	79	3	3	1.43	53590.3	65.03	47.5	151.9	20.59	65.2	5.9	64	1.66	188	4.86	98	1.106	104	2.689	65.1	110	59.18	1	0	1	76	1	0	1	0	2	2	2	1	15.9	2	0	1
1652	16	17	15	5.4	91	5.051	5	297.4	0.5	44.2	2	57	4	3	2.59	13255.5	109.33	84.8	161.2	32.63	102.7	5.1	54	1.39	182	4.71	73	0.82	114	2.95	8.7	132	6.59	2	0	1	83	0	0	3	0	1	1	1	0	10	2	1	1
59345	16	21	27	9.64	111	6.16	7.5	446.1	1.18	104.31	1	76	3	2	2.04	10292.1	63.95	93.3	177	29.78	115.6	5.8	56	1.45	253	6.54	141	1.592	169	4.37	7.8	119	6.55	2	0	1	37	1	0	2	1	1	1	2	0	30	3	1	1
1546	14	20	16	5.7	101	5.607	2.5	148.7	0.4	35.4	2	57	1	2	3.16	4848.45	115.37	52	144.5	24.9	76.2	5.4	59	1.52	251	6.49	124	1.4	167	4.32	5.1	34	15	1	0	1	69	1	0	1	0	1	1	1	0	7.3	1	0	1
44676	14	34	25	8.93	93	5.16	9.3	553.2	1.12	99.01	2	59	4	3	2.02	22105.5	56.65	95.2	167.4	33.97	99.3	5.7	70	1.81	277	7.16	107	1.208	186	4.81	7.9	90	8.78	1	1	1	63	1	0	3	0	1	2	3	1	11.7	2	1	1
5452	13	18	20	7.1	95	5.273	6	356.9	0.6	53	2	85	3	4	1.44	11863.8	87.91	59.3	149.8	26.43	99.7	5.4	45	1.17	183	4.73	174	1.96	103	2.66	2.2	37	5.95	2	0	1	69	0	0	2	1	1	1	2	0	24.8	3	1	0
12678	12	13	17	6.07	86	4.774	7	416.4	1	88.4	2	45	4	2	2	10760.6	70.8	70.5	160	27.54	99.2	5.7	29	0.75	265	6.85	131	1.48	210	5.43	42.4	109	38.9	2	1	1	92	1	0	2	0	2	2	2	1	13.7	2	1	0
61612	12	17	13	4.64	101	5.61	3.5	208.2	0.61	53.92	2	77	2	1	0.58	7659.14	92.02	54.2	152.8	23.21	96	5.7	55	1.42	206	5.33	126	1.423	126	3.258	7	18	38.89	1	0	1	79	1	0	1	0	2	2	1	0	13.7	2	1	1
1942	11	14	13	4.6	85	4.718	3.8	226	0.7	61.9	2	45	4	2	2.04	11912.5	108.62	70.4	154.1	29.65	89.3	5.5	69	1.78	192	4.97	46	0.52	114	2.95	16.6	201	8.26	1	0	1	90	0	0	2	0	1	1	1	0	5.3	1	1	1
40705	11	20	12	4.28	85	4.72	6.2	368.8	1.4	123.76	1	72	4	2	1.12	11928.2	53.4	89.4	177.1	28.5	100.7	5	31	0.8	166	4.29	107	1.208	114	2.948	20	344	5.81	1	0	1	81	0	0	2	0	1	2	3	1	30	3	0	0
53288	10	23	12	4.28	218	12.1	4.1	243.9	0.66	58.34	2	79	3	3	1.66	20452.6	89.18	69.2	151.4	30.19	97.5	6.7	64	1.66	141	3.65	143	1.614	48	1.241	1.6	29	5.52	1	0	1	54	0	1	3	1	1	1	2	0	13.7	2	1	1
4636	9	21	19	6.8	83	4.607	5	297.4	1.2	106.1	2	85	3	1	1.46	10853.5	44.36	55.1	155.3	22.85	78.9	5.4	50	1.28	344	8.9	294	3.32	236	6.1	11.9	138	8.62	1	0	1	64	0	0	1	1	1	3	4	1	21.5	3	0	1
37389	8	16	15	5.36	82	4.55	5.4	321.2	1.4	123.76	1	71	3	2	0.69	17082.2	53.73	79.3	185.7	23	92.1	5.2	29	0.75	168	4.34	205	2.314	98	2.534	5.5	142	3.87	1	1	1	83	0	0	1	1	1	2	3	1	30	3	0	0
50411	393	310	9	3.21	100	5.55	4.3	255.8	0.81	71.6	1	74	3	3	5	36988.1	92.52	92.2	168.8	32.36	115	5.7	44	1.14	167	4.32	71	0.802	109	2.819	2.2	10	22	2	0	1	63	1	0	3	0	1	1	1	0	30	3	1	1
52446	106	102	9	3.21	103	5.72	6.2	368.8	0.88	77.79	2	65	3	4	3.5	68777.5	72.89	86.1	156.7	35.06	106.7	7.4	66	1.71	304	7.86	154	1.739	207	5.353	3.4	64	5.31	1	0	1	65	1	1	3	1	1	1	2	0	27.5	3	1	1
43329	93	52	11	3.93	94	5.22	7.1	422.3	0.77	68.07	1	37	3	5	5	55681.9	118.25	164	180.7	50.23	152.3	5.2	35	0.91	204	5.28	238	2.687	121	3.129	7.1	185	3.84	2	0	1	78	0	0	3	1	1	1	1	0	5.6	1	1	0
25299	76	105	10	3.57	95	5.27	4.3	255.8	0.7	61.88	2	64	3	2	1.24	23769.9	96.52	65.7	164.4	24.31	100.2	5.4	74	1.91	211	5.46	95	1.073	118	3.051	7.9	122	6.48	2	0	1	62	0	0	1	0	1	1	1	0	11.7	2	1	1
35375	74	57	23	8.21	111	6.16	7	416.4	0.9	79.56	2	65	3	4	1.56	74588.9	70.95	92.5	171.4	31.49	107.3	5.9	79	2.04	313	8.09	256	2.89	183	4.732	3.3	38	8.68	2	0	1	71	1	0	3	1	1	1	2	0	27.5	3	1	1
51422	64	43	8	2.86	118	6.55	8.2	487.7	0.62	54.81	1	29	1	1	2.28	19798.8	132.69	136.3	171.7	46.23	142.9	6	38	0.98	202	5.22	56	0.632	153	3.957	6.2	104	5.96	2	0	1	74	1	0	3	0	1	1	1	0	7.9	1	1	0
61342	63	48	10	3.57	329	18.26	3.9	232	0.49	43.32	2	38	3	3	0.89	18399	123.64	102.2	164.4	37.81	108.8	5.8	30	0.78	316	8.17	1377	15.546	115	2.97	295	100	295	2	0	1	92	1	1	3	1	2	2	1	0	6.3	1	1	0
52632	52	48	14	5	197	10.94	5.9	350.9	0.89	78.68	1	61	2	5	4.64	5848.9	97.5	107.2	180.2	33.01	119.2	9.6	37	0.96	199	5.15	220	2.484	118	3.051	60.4	164	36.83	2	1	1	69	0	1	3	1	2	2	1	0	30	3	1	0
43018	51	61	13	4.64	91	5.05	6.3	374.7	0.72	63.65	2	68	1	1	0.7	5858.77	91.02	74.6	146	35	104.7	5.9	64	1.66	209	5.4	83	0.937	128	3.31	3	46	6.52	1	0	1	39	1	0	3	0	1	1	1	0	13.7	2	1	1
60069	46	47	10	3.57	95	5.27	2.7	160.6	0.57	50.39	2	49	2	4	2.61	20951.6	111.33	72.5	160.1	28.28	92.5	5.6	60	1.55	273	7.06	91	1.027	195	5.043	6.8	88	7.73	2	0	1	78	0	0	2	0	1	1	1	0	5.3	1	1	1
59223	44	32	14	5	179	9.94	4.4	261.7	0.91	80.44	1	71	4	2	1.37	11983.6	90.11	77.9	180.3	23.96	100.9	8.1	51	1.32	166	4.29	60	0.677	103	2.664	89.9	146	61.58	1	0	1	78	0	1	1	0	2	2	1	0	30	3	0	1
62112	44	33	15	5.36	129	7.16	5	297.4	0.7	61.88	2	58	2	3	0.93	14063.7	100.19	53.7	147.9	24.55	84.7	6.3	45	1.16	221	5.72	205	2.314	135	3.491	7.3	128	5.7	1	0	1	79	1	1	1	1	1	1	1	0	15.9	2	0	0
54551	42	30	15	5.36	199	11.05	5.6	333.1	0.75	66.3	1	47	1	3	3.5	23408	112.01	129.7	176.5	41.63	123	7.8	39	1.01	173	4.47	192	2.168	96	2.483	100.5	130	77.31	2	0	1	87	0	1	3	1	2	2	1	0	15.6	2	1	0
60891	42	40	8	2.86	100	5.55	3.3	196.3	0.53	46.85	2	46	1	3	1.17	11577.9	115.44	87.2	161.5	33.43	109.8	6.1	38	0.98	172	4.45	158	1.784	102	2.638	10	163	6.13	2	0	1	97	1	0	3	1	1	1	1	0	7.3	1	1	0
63504	42	27	11	3.93	113	6.27	5.8	345	0.83	73.37	1	54	1	1	4.3	33162.4	104	95.3	173.2	31.8	112.9	6.7	47	1.22	149	3.85	143	1.614	73	1.888	6.9	178	3.88	2	0	1	80	1	1	3	1	1	1	1	0	13.3	2	1	1
34454	40	25	11	3.93	93	5.16	6.8	404.5	1.1	97.24	1	35	5	3	1.43	31184.3	89.78	97.6	179.2	30.39	102.9	5.3	45	1.16	247	6.39	132	1.49	176	4.551	6.5	195	3.33	2	0	1	77	0	0	3	0	1	1	2	0	13.3	2	1	1
9040	40	41	10	3.6	237	13.156	4.5	267.7	0.5	44.2	2	68	1	1	0.06	2629.5	102.1	66.9	146.8	31.04	95.4	8.7	41	1.06	246	6.36	208	2.35	163	4.22	40.1	28	143.21	2	0	1	46	0	1	3	1	2	2	1	1	24.8	3	1	0
58560	39	27	19	6.78	102	5.66	5.3	315.2	0.72	63.65	1	51	2	3	2.36	14216.4	110.61	70.7	163.4	26.48	96	5.7	36	0.93	210	5.43	84	0.948	157	4.06	162.5	117	138.89	2	0	1	85	1	0	2	0	2	2	1	0	15.6	2	0	0
990	39	49	14	5	119	6.606	7.2	428.3	0.8	70.7	1	60	1	3	3.05	1970.95	101.32	74.5	161.9	28.42	99	5.9	51	1.31	282	7.29	197	2.22	192	4.97	35.3	522	6.76	2	0	1	79	1	0	2	1	1	1	1	0	30	3	0	1
15348	38	28	21	7.5	104	5.773	7.6	452	0.9	79.56	1	59	3	5	4.31	30324.9	98.39	99.4	171.3	33.87	106.9	5.8	35	0.91	192	4.97	251	2.83	107	2.77	5.2	122	4.26	1	0	1	79	1	0	3	1	1	1	1	0	30	3	1	0
46394	38	28	16	5.71	92	5.11	7	416.4	0.92	81.33	1	66	3	4	5	40876.9	91.74	101.7	174.2	33.51	118.9	5.5	44	1.14	148	3.83	96	1.084	85	2.198	11.1	162	6.85	2	0	1	68	0	0	3	0	1	1	1	0	30	3	1	1
39046	37	35	12	4.28	85	4.72	7.7	458	1.2	106.08	1	70	3	3	1.21	15391.9	65.06	99.1	175.5	32.18	122.2	5.3	39	1.01	238	6.15	378	4.268	123	3.181	18.2	207	8.79	2	0	1	77	0	0	3	1	1	1	2	0	30	3	1	0
45625	37	30	16	5.71	89	4.94	4.8	285.5	0.62	54.81	1	76	2	3	1.96	8946.3	99.06	83	171	28.38	111.1	6.7	56	1.45	222	5.74	191	2.156	128	3.31	21.4	179	11.96	2	0	1	66	0	1	2	1	1	1	1	0	30	3	1	1
3841	36	32	13	4.6	105	5.829	5.5	327.1	0.7	61.9	1	37	3	2	2.49	51153.2	121.71	72.4	164.5	26.76	94.6	4.6	52	1.34	190	4.91	153	1.73	108	2.79	16.6	296	5.61	2	0	1	81	1	0	2	1	1	1	1	0	6.7	1	0	1
32812	34	38	11	3.93	100	5.55	4.5	267.7	0.9	79.56	2	49	4	2	2.4	34121.7	78.37	66.9	169	23.42	89.1	5.6	90	2.33	190	4.91	83	0.937	83	2.146	2.1	137	1.53	2	0	1	75	1	0	1	0	1	1	2	1	5.3	1	1	1
38617	34	43	13	4.64	104	5.77	6.3	374.7	1	88.4	1	64	4	2	1.87	9714.12	84.05	81.9	178.6	25.68	102.6	4.8	76	1.97	206	5.33	71	0.802	116	3	142.3	226	62.96	2	0	1	53	1	0	2	0	2	2	2	1	30	3	1	1
54769	34	40	19	6.78	154	8.55	9.7	577	1.36	120.22	1	64	3	5	1.59	18769.8	58.11	113.3	187.5	32.23	115	7.7	31	0.8	119	3.08	213	2.405	45	1.164	16.3	173	9.42	2	1	1	81	0	1	3	1	1	2	3	1	30	3	1	0
59213	34	23	11	3.93	134	7.44	5.6	333.1	0.98	86.63	1	62	1	5	5	5442.63	87.19	84.6	163.3	31.72	109.8	5.9	74	1.91	213	5.51	146	1.648	110	2.845	11.8	206	5.73	2	0	1	100	1	1	3	1	1	1	2	0	15.6	2	1	1
31167	33	20	16	5.71	99	5.5	7.6	452	0.9	79.56	1	37	3	4	4.16	60628.2	112.81	129.9	194.2	34.44	121	5.9	37	0.96	202	5.22	325	3.669	100	2.586	35.2	159	22.14	2	0	1	76	1	0	3	1	1	1	1	0	15.6	2	1	0
60932	33	30	5	1.79	90	5	4.7	279.6	0.66	58.34	2	47	2	2	1.09	18922.6	108.81	87.8	158.2	35.08	108.2	5.5	41	1.06	214	5.53	169	1.908	139	3.595	18.6	68	27.35	1	0	1	81	1	1	3	1	1	1	1	0	15.9	2	1	0
64646	33	38	14	5	94	5.22	6.2	368.8	1.08	95.47	1	80	3	4	2.68	32860.8	69.37	76.6	172.2	25.8	95	5.5	34	0.88	128	3.31	127	1.434	69	1.784	29.2	38	76.84	2	0	1	57	0	0	2	0	2	2	2	1	30	3	0	0
14980	32	25	12	4.28	105	5.829	6.1	362.8	0.9	79.56	1	52	3	4	4.36	39162.5	102.76	90.4	175.8	29.25	106.6	5.4	41	1.06	250	6.47	254	2.87	158	4.09	10.8	104	10.38	1	0	1	79	1	0	2	1	1	1	1	0	18.4	2	1	1
1295	31	19	14	5	127	7.05	7.5	446.1	0.8	70.7	1	60	3	3	5	19629.3	101.32	104.6	174.5	34.35	111	6.3	66	1.7	190	4.91	136	1.54	97	2.51	17.9	92	19.46	2	0	1	92	1	1	3	1	1	1	1	0	25.3	3	1	1
15366	31	21	10	3.57	105	5.829	5.4	321.2	1	88.4	1	48	3	3	5	48580.7	92.84	84.8	170.6	29.14	98.4	5.6	29	0.75	164	4.24	118	1.33	111	2.87	22.3	221	10.09	1	0	1	77	1	0	2	0	1	1	1	0	13.3	2	0	0
44791	31	30	14	5	112	6.22	4.8	285.5	0.82	72.49	1	64	2	4	2.94	8017.06	98.09	85.8	174.1	28.31	101.5	6.2	43	1.11	148	3.83	135	1.524	78	2.017	2.7	88	3.07	2	0	1	76	1	0	2	1	1	1	1	0	25.3	3	0	1
33694	30	25	14	5	122	6.77	8.3	493.7	0.9	79.56	1	54	3	3	2.42	89650.9	101.49	122.2	176.6	39.18	126.5	6.1	46	1.19	175	4.53	214	2.416	86	2.224	13.4	210	6.38	2	0	1	87	1	1	3	1	1	1	1	0	13.3	2	1	1
5401	30	24	12	4.3	97	5.384	4.8	285.5	0.5	44.2	2	54	1	1	0.67	3878.17	111.39	78.2	159.9	30.59	93.4	5.6	48	1.23	176	4.55	77	0.87	113	2.92	1.4	58	2.41	1	0	1	73	0	0	3	0	1	1	1	0	6.3	1	1	0
42479	29	22	13	4.64	107	5.94	7.5	446.1	0.72	63.65	2	55	4	3	3.09	22001.9	98.68	116	163.3	43.5	127.1	6.6	50	1.29	217	5.61	92	1.039	149	3.853	5.7	87	6.55	2	0	1	0	1	1	3	0	1	1	1	0	13.7	2	1	1
43717	29	23	10	3.57	86	4.77	7.3	434.2	1.28	113.15	1	34	1	4	3.69	31367.7	75.32	104.5	184	30.87	109.5	5.4	42	1.09	185	4.78	116	1.31	120	3.103	4.1	80	5.13	2	0	1	86	0	0	3	0	1	1	2	0	3.3	1	1	1
48048	29	23	11	3.93	105	5.83	5.4	321.2	0.88	77.79	1	48	2	1	1.43	23869.6	106.07	109.4	176.9	34.96	114.2	5.8	34	0.88	213	5.51	221	2.495	135	3.491	15.5	212	7.31	1	0	1	91	1	0	3	1	1	1	1	0	30	3	1	0
52602	29	37	12	4.28	99	5.5	4.9	291.5	0.85	75.14	2	64	4	2	1.33	16785.6	76.46	82.1	166.8	29.51	96.8	5.9	43	1.11	206	5.33	82	0.926	147	3.801	4	174	2.3	2	0	1	83	1	0	2	0	1	1	2	0	18.51	2	1	0
13767	28	18	12	4.28	136	7.549	6	356.9	0.9	79.56	1	47	2	5	1.84	7652.73	106.01	96.4	164.1	35.8	114.5	6.8	36	0.93	224	5.79	565	6.38	115	2.97	176.5	161	109.63	2	0	1	98	0	1	3	1	2	2	1	0	13.3	2	1	0
39452	28	30	13	4.64	109	6.05	7.1	422.3	0.7	61.88	1	36	3	4	3.25	84293.6	122.47	83.5	188.6	23.47	97.2	4.9	64	1.66	177	4.58	73	0.824	98	2.534	3.7	16	23.13	2	0	1	80	0	0	1	0	1	1	1	0	5.6	1	0	1
29121	27	28	16	5.71	164	9.1	5.3	315.2	0.7	61.88	2	72	1	2	3.96	6104.25	91.83	70.8	160.2	27.59	98.7	7.5	66	1.71	231	5.97	248	2.8	115	2.974	15.4	55	28	2	0	1	75	0	1	2	1	1	1	1	0	10	2	1	1
57170	26	25	17	6.07	57	3.16	4.6	273.6	0.67	59.23	2	56	3	4	2.27	99448.7	102.52	82.5	169.1	28.85	99.8	5	87	2.25	200	5.17	51	0.576	103	2.664	2.9	74	3.92	2	0	1	76	1	0	2	0	1	1	1	0	13.7	2	1	1
59833	26	26	22	7.85	100	5.55	6.6	392.6	1.28	113.15	2	62	3	4	3.62	75274.8	47.37	102.5	167.7	36.45	118.7	5.9	44	1.14	196	5.07	185	2.089	115	2.974	4.4	63	6.98	1	0	1	67	1	0	3	1	1	2	3	1	15.9	2	1	0
7713	26	24	17	6.1	145	8.049	4.3	255.8	0.8	70.7	2	62	2	1	0.89	17191.2	83.26	62	148.2	28.23	94.4	7.8	40	1.02	189	4.89	78	0.88	134	3.47	5.1	57	8.95	2	0	1	72	0	1	2	0	1	1	2	0	10	2	1	0
10887	25	28	10	3.57	72	3.997	4.5	267.7	0.8	70.72	2	38	1	3	1.58	10393.8	96.66	41.2	154.5	17.26	62.5	5.1	87	2.25	184	4.76	53	0.6	86	2.22	8.3	181	4.59	2	0	1	77	0	0	1	0	1	1	1	0	3.3	1	0	1
25533	25	21	13	4.64	91	5.05	5.1	303.3	0.8	70.72	2	64	3	3	2.64	43971.1	82.23	76.4	156.1	31.35	103	5.8	51	1.32	206	5.33	203	2.292	114	2.948	23.5	143	16.43	1	0	1	58	1	0	3	1	1	1	2	0	13.7	2	1	1
51696	25	19	10	3.57	91	5.05	6.7	398.5	0.9	79.56	1	54	4	5	1.39	20512	101.49	77.3	170.4	26.62	92.6	5.7	86	2.22	202	5.22	85	0.96	99	2.56	17.3	128	13.52	4	1	1	97	1	0	2	0	1	1	1	0	9.4	1	0	1
53127	25	23	14	5	97	5.38	7.5	446.1	1.08	95.47	1	39	1	5	5	42095.5	89.52	115.9	188.4	32.65	110	5.6	39	1.01	178	4.6	120	1.355	115	2.974	22.7	295	7.69	2	0	1	94	1	0	3	0	1	1	2	0	6.7	1	1	0
54175	25	22	14	5	98	5.44	6.5	386.6	0.77	68.07	1	51	1	1	1.22	19113.1	108.39	98.8	171.7	33.51	115.8	6.3	33	0.85	238	6.15	297	3.353	146	3.776	32.6	317	10.28	1	0	1	87	1	0	3	1	1	1	1	0	25.3	3	1	0
61238	25	23	15	5.36	99	5.5	6.3	374.7	1	88.4	1	47	3	4	1.94	67585.7	93.42	70	175.8	22.65	88.5	5.6	76	1.97	227	5.87	96	1.084	132	3.414	4.5	123	3.66	2	0	1	37	1	0	1	0	1	1	1	0	21.6	3	0	1
64536	25	26	14	5	123	6.83	5.3	315.2	0.71	62.76	2	75	3	2	5	68852.7	88.61	73.9	162.1	28.1	97	5.6	51	1.32	169	4.37	136	1.535	91	2.353	36.9	100	36.9	2	0	1	68	0	1	2	1	2	2	2	1	11.7	2	1	1
37905	24	20	11	3.93	104	5.77	6.8	404.5	1	88.4	1	58	3	5	0.63	29778.8	87.24	100.5	181.8	30.41	113.2	5.5	42	1.09	234	6.05	157	1.773	161	4.163	12.7	151	8.41	2	0	1	81	1	0	3	1	1	1	2	0	30	3	1	1
48565	24	17	13	4.64	99	5.5	7.9	469.9	0.81	71.6	1	53	3	2	2.5	24672.3	105.43	96.1	182.8	28.76	110.7	5.6	42	1.09	205	5.3	155	1.75	132	3.414	3.7	80	4.63	1	0	1	85	1	0	2	1	1	1	1	0	15.6	2	1	1
18051	23	24	10	3.57	90	4.996	5.7	339	1	88.4	2	51	3	5	3.59	52610.3	68.21	117.3	164.5	43.35	127.5	5.1	48	1.24	265	6.85	165	1.86	184	4.76	8.7	74	11.76	1	0	1	78	1	0	3	1	1	1	2	0	13.7	2	1	0
20339	23	23	13	4.64	83	4.607	6.7	398.5	1.2	106.08	1	37	4	2	5	15007.1	79.88	96.1	180.2	29.59	99.2	5.2	31	0.8	277	7.16	259	2.92	194	5.02	8.9	302	2.95	1	0	1	87	0	0	2	1	1	1	2	0	7.9	1	0	0
20407	23	23	21	7.5	102	5.662	7.2	428.3	0.9	79.56	2	75	4	2	1.83	7964.76	66.67	83.6	156.9	33.96	107.6	5.8	69	1.78	239	6.18	138	1.56	142	3.67	0.5	32	1.56	1	0	1	64	1	0	3	1	1	1	2	0	11.7	2	1	1
2925	23	30	33	11.8	102	5.662	8.8	523.4	1.6	141.4	1	81	3	3	2.67	7193.92	43.02	82.2	169.1	28.75	109.5	6	49	1.28	115	2.97	73	0.82	51	1.32	6.4	192	3.33	2	0	1	69	1	0	2	0	1	3	4	1	30	3	1	1
42402	23	38	15	5.36	83	4.61	3.7	220.1	0.91	80.44	2	61	1	4	2.5	6681.8	71.78	57.2	153.5	24.28	80.2	5.4	53	1.37	203	5.25	76	0.858	135	3.491	2.1	27	7.78	1	0	1	61	0	0	1	0	1	1	2	0	7.3	1	0	1
614	23	23	12	4.3	139	7.716	5.5	327.1	0.7	61.9	2	66	3	3	2.14	27664.7	95.32	105	169.1	36.72	120.5	6.1	51	1.31	214	5.53	142	1.6	135	3.49	11.6	230	5.04	1	0	1	51	1	1	3	1	1	1	1	0	15.9	2	1	1
12026	22	17	18	6.43	91	5.051	6.4	380.7	0.8	70.72	2	53	1	2	5	6773.18	88.05	82.2	157.9	32.97	97.9	5.7	32	0.83	262	6.78	112	1.26	208	5.38	7.9	96	8.23	2	0	1	81	1	0	3	0	1	1	2	0	18.51	2	1	0
40900	22	26	14	5	89	4.94	6.9	410.4	1.1	97.24	1	85	3	1	1.21	25709.5	65.78	83.6	166.4	30.19	112.9	4.6	39	1.01	123	3.18	257	2.902	33	0.853	12.6	69	18.26	2	1	1	73	0	0	3	1	1	1	2	0	30	3	1	0
49856	22	26	13	4.64	109	6.05	6.5	386.6	1.21	106.96	1	68	4	2	1.59	8415.79	65.22	70.7	174.1	23.33	84.7	6.2	51	1.32	237	6.13	91	1.027	168	4.344	10.2	134	7.61	1	0	1	79	1	0	1	0	1	1	2	0	30	3	0	1
52217	22	18	12	4.28	92	5.11	4.5	267.7	0.66	58.34	2	48	5	4	3.5	71310.7	108.14	92.7	161.6	35.5	112	5.5	54	1.4	188	4.86	110	1.242	112	2.896	44.5	187	23.8	2	0	1	66	0	1	3	0	1	1	1	0	6.3	1	1	1
52557	22	28	3	1.07	100	5.55	7.2	428.3	0.97	85.75	1	62	3	5	5	57388.7	88.27	79.1	179.8	24.47	93.5	5.3	76	1.97	226	5.84	81	0.914	134	3.465	1.6	33	4.85	2	0	1	81	1	0	1	0	1	1	2	0	21.6	3	0	1
10075	21	21	12	4.28	126	6.994	8.8	523.4	0.9	79.56	1	46	3	3	3.6	48580.7	106.67	86.1	176.2	27.73	98.7	5.3	34	0.88	205	5.3	250	2.82	121	3.13	111	75	148	2	0	1	83	0	1	2	1	2	2	1	0	29.4	3	0	0
17978	21	31	28	10	91	5.051	6.2	368.8	0.8	70.72	1	73	3	3	3.14	11685.2	93.45	70.1	164	26.06	95.3	5.1	60	1.55	215	5.56	93	1.05	136	3.52	17.1	156	10.96	2	0	1	81	0	0	2	0	1	1	1	0	30	3	0	1
18453	21	27	9	3.21	98	5.44	6.8	404.5	0.8	70.72	2	71	1	3	2.52	3688.25	78.72	47.9	153.5	20.33	83.5	5.1	69	1.78	304	7.86	104	1.17	214	5.53	11.5	130	8.85	2	0	1	75	1	0	1	0	1	1	2	0	21.5	3	0	1
47389	21	24	6	2.14	91	5.05	4.3	255.8	0.82	72.49	1	60	4	3	5	6933.44	100.56	69.4	175.7	22.48	88.9	5.3	62	1.6	212	5.48	140	1.581	122	3.155	5.2	110	4.73	2	0	1	87	1	0	1	1	1	1	1	0	30	3	0	1
49339	21	30	13	4.64	95	5.27	4.1	243.9	0.72	63.65	2	61	2	5	5	7153.96	95.07	57.4	158.8	22.76	80.4	5	57	1.47	198	5.12	153	1.727	110	2.845	3.4	44	7.73	1	0	1	75	1	0	1	1	1	1	1	0	11.7	2	0	1
55892	21	24	19	6.78	106	5.88	6.9	410.4	1.09	96.36	1	66	3	3	1.29	55161.2	74.85	77.5	157.8	31.12	102.3	5.6	47	1.22	212	5.48	121	1.366	141	3.646	8	94	8.51	1	0	1	75	1	0	3	0	1	1	2	0	25.3	3	1	1
51836	20	20	24	8.57	92	5.11	5.1	303.3	9.13	807.09	1	51	4	4	2.75	20544.8	6.41	84.2	178.2	26.52	98	5.3	47	1.22	215	5.56	221	2.495	124	3.207	275	192	143.23	2	0	1	88	0	0	2	1	2	4	6	1	30	3	0	1
6266	20	21	20	7.1	97	5.384	7.1	422.3	0.9	79.6	1	79	3	5	1.6	17139	86.88	81.2	175.7	26.3	101.3	5.2	53	1.36	219	5.66	137	1.55	139	3.59	35.9	155	23.16	2	0	1	75	1	0	2	1	1	1	2	0	30	3	0	1
7657	20	24	21	7.5	88	4.885	5.2	309.3	0.7	61.9	2	66	3	3	3.6	19346	95.32	62.8	160.5	24.38	91.5	4.8	47	1.22	253	6.54	178	2.01	170	4.4	5.4	75	7.2	2	0	1	91	0	0	1	1	1	1	1	0	21.5	3	1	0
862	20	14	25	8.9	167	9.27	3.2	190.3	0.7	61.9	1	53	1	2	2.28	5913	110.18	71.4	164.2	26.48	93.9	8.8	28	0.73	265	6.85	510	5.76	115	2.97	145.7	93	156.67	2	0	1	80	0	1	2	1	2	2	1	0	30	3	0	0
13406	19	25	12	4.28	96	5.329	3.7	220.1	1.2	106.08	1	85	3	5	5	11683.7	59.26	73.6	174.6	24.14	93.8	5	100	2.59	156	4.03	48	0.54	46	1.19	6.3	152	4.14	2	0	1	59	0	0	1	0	1	2	3	1	30	3	0	1
13620	19	24	4	1.43	104	5.773	5	297.4	0.6	53.04	2	73	3	2	1.72	19145.2	94.72	78.4	166.2	28.38	93.5	5.7	59	1.53	226	5.84	185	2.09	130	3.36	7.8	59	13.22	2	0	1	81	1	0	2	1	1	1	1	0	18.51	2	1	1
17895	19	22	10	3.57	87	4.829	5.1	303.3	0.9	79.56	1	22	4	4	2.28	16064.8	123.84	60	174.6	19.68	70.6	5.2	81	2.09	204	5.28	52	0.59	113	2.92	7.1	142	5	2	0	1	93	0	0	1	0	1	1	1	0	4.7	1	0	1
31263	19	24	18	6.43	146	8.1	7.6	452	1.1	97.24	2	78	4	1	1.74	19373.1	51.43	76.2	155.2	31.64	94	6.9	53	1.37	159	4.11	79	0.892	90	2.327	11.6	75	15.47	1	0	1	65	0	1	3	0	1	2	3	1	27.5	3	1	1
44149	19	28	8	2.86	107	5.94	4.6	273.6	0.68	60.11	2	80	3	3	5	27418.1	87.99	61.4	158	24.6	82.2	5.9	80	2.07	195	5.04	100	1.129	95	2.457	31.7	95	33.37	2	0	1	61	1	0	1	0	2	2	2	1	24.8	3	0	1
47626	19	27	13	4.64	81	4.5	3.4	202.2	0.68	60.11	2	67	3	5	2.86	59522.8	95.4	62.2	164.7	22.93	82.7	5.9	83	2.15	237	6.13	68	0.768	140	3.62	3.4	11	30.91	2	0	1	72	1	0	1	0	2	2	1	0	13.7	2	0	1
53775	19	26	13	4.64	196	10.88	7.9	469.9	1.22	107.85	2	79	3	4	0.05	19106.6	45.14	91.2	158.7	36.21	106.5	7.2	31	0.8	168	4.34	181	2.043	101	2.612	6.3	173	3.64	2	1	1	58	0	1	3	1	1	2	3	1	30	3	1	0
63094	19	19	14	5	147	8.16	5.4	321.2	0.99	87.52	1	80	3	4	2.58	27167.4	77.01	86.3	174.4	28.4	110.8	7.2	54	1.4	168	4.34	101	1.14	94	2.431	10.3	127	8.11	2	0	1	65	0	1	2	0	1	1	2	0	30	3	1	1
64558	19	18	9	3.21	96	5.33	4.4	261.7	0.77	68.07	1	62	4	4	3.93	11764.4	101.22	90	174.3	29.6	107.3	5.6	43	1.11	134	3.47	58	0.655	79	2.043	8.4	139	6.04	1	0	1	87	0	0	2	0	1	1	1	0	30	3	1	1
20944	18	19	9	3.21	81	4.496	3.9	232	0.8	70.72	2	51	3	4	5	29613.1	89.15	62.2	157.1	25.2	85	5.1	57	1.47	171	4.42	71	0.8	100	2.59	3.3	75	4.4	1	0	1	90	0	0	2	0	1	1	2	0	7.3	1	0	1
22136	18	17	13	4.64	150	8.33	4.7	279.6	0.8	70.72	1	70	1	1	1.31	3238.03	95.21	83.2	162.6	31.47	108.6	6.8	32	0.83	188	4.86	149	1.682	126	3.258	65.5	151	43.38	1	0	1	71	0	1	3	1	2	2	1	0	30	3	1	0
51754	18	21	12	4.28	83	4.61	5.2	309.3	0.77	68.07	2	58	3	3	3.51	93958.5	89.36	106	167.2	37.92	121	5.4	51	1.32	179	4.63	195	2.202	89	2.302	8.4	53	15.85	2	0	1	86	0	0	3	1	1	1	2	0	10	2	1	1
57014	18	20	15	5.36	101	5.61	5.7	339	1.06	93.7	1	64	2	1	1.36	7351.05	78.37	75.1	168.6	26.42	102.7	5.7	37	0.96	215	5.56	136	1.535	151	3.905	1	33	3.03	2	0	1	73	1	0	2	1	1	1	2	0	30	3	1	0
58980	18	24	18	6.43	84	4.66	3.6	214.1	0.55	48.62	2	54	1	3	2.7	11495	108.86	52.7	154.3	22.13	75.6	5.5	61	1.58	172	4.45	73	0.824	96	2.483	15	138	10.87	1	0	1	79	0	0	1	0	1	1	1	0	5.3	1	0	1
25773	17	21	19	6.78	190	10.55	6.6	392.6	0.9	79.56	2	65	3	3	1.24	33763.9	70.95	85.8	166.9	30.8	108.2	8.6	60	1.55	249	6.44	239	2.698	141	3.646	103.8	161	64.47	1	0	1	65	0	1	3	1	2	2	2	1	18.51	2	1	1
4108	17	23	12	4.3	95	5.273	4.2	249.8	0.7	61.9	1	72	3	1	0.98	11471.3	97.9	64.9	161.2	24.98	96.1	5.5	61	1.58	201	5.2	77	0.87	124	3.21	48.5	113	42.92	2	0	1	73	0	0	1	0	2	2	1	0	30	3	0	1
7567	17	19	10	3.6	137	7.605	5.7	339	0.7	61.9	2	56	4	2	0.9	11949	101.44	75.2	175.1	24.53	96.1	7.3	45	1.17	203	5.25	391	4.41	80	2.07	32	125	25.6	1	0	1	96	0	1	1	1	1	1	1	0	24.8	3	1	0
35324	16	16	28	10	96	5.33	8.7	517.5	1.3	114.92	1	76	3	3	1.36	39086.2	56.93	101.8	176.2	32.79	122.2	5.7	43	1.11	143	3.7	114	1.287	77	1.991	42	187	22.46	1	1	1	65	1	0	3	0	1	2	3	1	30	3	1	1
39251	16	24	17	6.07	85	4.72	4.8	285.5	0.9	79.56	2	67	3	5	5	70166.3	70.07	58	162.4	21.99	78	5.4	90	2.33	243	6.28	47	0.531	144	3.724	2.4	58	4.14	2	0	1	93	0	0	1	0	1	1	2	0	24.8	3	0	1
45535	16	21	11	3.93	277	15.38	4.8	285.5	0.52	45.97	2	76	3	1	0.74	26343.2	96.23	87.5	164	32.53	104.9	7	60	1.55	249	6.44	181	2.043	153	3.957	7.4	67	11.04	2	0	1	62	0	1	3	1	1	1	1	0	15.9	2	1	1
16300	15	26	24	8.57	92	5.107	5.2	309.3	0.7	61.88	2	77	3	4	1.38	18243	89.02	87.3	163.8	32.54	102.1	5	79	2.04	208	5.38	103	1.16	108	2.79	6	59	10.17	1	0	1	61	0	0	3	0	1	1	2	0	18.51	2	1	1
23367	15	22	12	4.28	149	8.27	7.3	434.2	1.5	132.6	1	69	3	3	1.28	23295.8	50.08	74.7	176.4	24.01	93	5.5	42	1.09	222	5.74	240	2.71	132	3.414	15.2	92	16.52	2	0	1	76	0	1	1	1	1	2	3	1	30	3	0	1
32556	15	25	10	3.57	75	4.16	5.4	321.2	0.6	53.04	2	41	3	5	5	71128.2	115.57	72	163.4	26.97	93.5	5	61	1.58	176	4.55	98	1.106	95	2.457	9	73	12.33	2	0	1	91	0	0	2	0	1	1	1	0	5.3	1	1	1
3583	15	18	21	7.5	98	5.44	5.7	339	1.3	114.9	1	71	3	3	2.34	19472.8	58.73	96.4	168.7	33.87	114.8	5.1	31	0.81	203	5.25	588	6.64	115	2.97	31.8	88	36.14	1	0	1	60	0	0	3	1	2	3	3	1	30	3	1	0
42321	15	17	12	4.28	81	4.5	5.9	350.9	0.92	81.33	2	62	3	4	4.95	50923.1	70.4	80.4	165.9	29.21	100.7	4.9	64	1.66	192	4.97	105	1.185	107	2.767	8.6	60	14.33	1	0	1	81	0	1	2	0	1	1	2	0	10	2	1	1
43768	15	17	13	4.64	110	6.11	3.5	208.2	0.57	50.39	2	58	3	3	1.19	30297.6	105.27	68.1	159	26.94	98.1	5.9	42	1.09	158	4.09	187	2.111	79	2.043	6.1	34	17.94	1	0	1	72	1	1	2	1	1	1	1	0	18.51	2	1	0
44869	15	19	10	3.57	81	4.5	5.4	321.2	0.76	67.18	2	45	3	3	0.25	77824.4	98.42	92.1	176.6	29.53	108.8	5.5	53	1.37	269	6.96	192	2.168	178	4.603	17.2	245	7.02	1	0	1	92	0	0	2	1	1	1	1	0	13.7	2	1	1
1365	14	18	12	4.3	106	5.884	4.2	249.8	0.6	53	2	78	3	1	1.16	46427	91.82	73.7	168.1	26.08	92	5.3	51	1.31	202	5.22	133	1.5	125	3.23	5.5	53	10.38	1	0	1	61	1	0	2	0	1	1	1	0	13.7	2	1	1
27323	14	18	13	4.64	103	5.72	5.7	339	0.8	70.72	2	68	3	4	3.71	52339.8	80.21	73	165.3	26.72	88.7	5.3	73	1.89	269	6.96	119	1.344	172	4.448	6.5	73	8.9	2	0	1	76	1	0	2	0	1	1	2	0	10	2	1	1
29812	14	21	24	8.57	131	7.27	6.9	410.4	1	88.4	2	79	1	2	5	3982.21	57.31	61	155	25.39	91.5	5.9	61	1.58	229	5.92	161	1.818	136	3.517	7.6	85	8.94	1	0	1	68	1	1	2	1	1	2	3	1	21.5	3	1	1
48424	14	18	25	8.93	91	5.05	7.3	434.2	1.03	91.05	2	80	3	4	3.61	37845.9	54.97	63.5	155.4	26.29	101.3	5.7	66	1.71	227	5.87	107	1.208	140	3.62	9.2	162	5.68	2	0	1	70	1	0	2	0	1	2	3	1	27.5	3	1	1
61132	14	18	18	6.43	102	5.66	8.2	487.7	1.23	108.73	2	46	4	5	4.12	34749.3	54.89	196.6	152.2	84.87	152.5	5.8	77	1.99	202	5.22	70	0.79	111	2.87	1810	180	1005.56	2	0	1	93	1	0	3	0	3	4	3	1	6.3	1	1	1
61356	14	24	8	2.86	95	5.27	5.3	315.2	1.73	152.93	2	73	3	4	1.57	38648.1	30.81	88.8	160.5	34.47	117.3	6.1	47	1.22	164	4.24	108	1.219	95	2.457	15.3	76	20.13	1	0	1	38	1	0	3	0	1	3	4	1	11.7	2	1	0
9326	14	21	29	10.4	78	4.33	7.9	469.9	0.8	70.7	1	85	3	5	1.15	8104.26	86.73	77.5	163.1	29.13	106.6	5.4	50	1.29	241	6.23	141	1.59	163	4.22	24.7	140	17.64	1	0	1	70	0	0	2	1	1	1	2	0	30	3	1	1
24507	13	21	14	5	103	5.72	4.9	291.5	0.7	61.88	2	51	5	4	3.27	78406.8	104.64	58.1	158	23.27	89.4	5.2	46	1.19	254	6.57	204	2.303	167	4.319	7.3	118	6.19	2	1	1	88	1	0	1	1	1	1	1	0	15.9	2	1	0
53272	13	13	16	5.71	280	15.54	6	356.9	0.72	63.65	2	58	1	1	0.39	17473.1	96.86	78.2	154.3	32.85	107	12.1	38	0.98	249	6.44	137	1.547	184	4.758	16.9	77	21.95	1	0	1	64	0	1	3	1	1	1	1	0	11.7	2	1	0
53832	13	17	16	5.71	98	5.44	5.8	345	1.17	103.43	1	80	3	5	3.43	18987.4	63.02	76	164.9	27.95	112.3	5.5	51	1.32	201	5.2	85	0.96	133	3.439	13.9	202	6.88	2	0	1	56	1	0	2	0	1	1	2	0	30	3	1	1
60024	13	16	11	3.93	90	5	4.5	267.7	0.72	63.65	2	41	3	2	0.66	76359.4	107.66	66.7	156.6	27.2	93.3	5.2	68	1.76	266	6.88	138	1.558	170	4.396	19.2	222	8.65	2	0	1	84	0	0	2	1	1	1	1	0	3.9	1	1	1
62527	13	28	18	6.43	126	6.99	7.4	440.2	1.38	121.99	1	79	4	2	1.85	9541.52	52.02	71.3	166.3	25.8	95	5.9	54	1.4	158	4.09	62	0.7	92	2.379	13.2	146	9.04	2	0	1	58	1	1	2	0	1	2	3	1	30	3	0	1
54803	12	22	16	5.71	178	9.88	6.4	380.7	1.11	98.12	1	63	3	4	2.59	51725.4	74.62	120.5	190.5	33.2	114.3	7.5	33	0.85	135	3.49	110	1.242	80	2.069	11.7	68	17.21	2	0	1	65	0	1	3	0	1	1	2	0	29.4	3	1	0
58798	12	18	22	7.85	123	6.83	5.3	315.2	1.16	102.54	2	69	4	4	1.63	13020.6	51.03	73.6	169.5	25.62	97.5	6.6	75	1.94	219	5.66	93	1.05	125	3.233	5.7	44	12.95	1	0	1	75	0	1	2	0	1	2	3	1	13.7	2	1	1
9099	12	15	22	7.9	106	5.884	4.5	267.7	0.8	70.7	2	79	3	4	5	30399.7	74.9	73.9	172	24.98	95	5.3	37	0.96	194	5.02	95	1.07	138	3.57	13.4	165	8.12	2	0	1	41	1	0	1	0	1	1	2	0	24.8	3	1	0
52687	11	17	10	3.57	87	4.83	4.8	285.5	0.79	69.84	2	77	4	2	0.23	12778.3	76.99	68.5	149	30.85	101.4	5.9	77	1.99	170	4.4	75	0.847	78	2.017	7.9	26	30.38	2	0	1	60	1	0	3	0	2	2	2	1	15.9	2	1	1
43254	10	20	11	3.93	91	5.05	5.4	321.2	0.85	75.14	1	71	3	4	2.5	34961.9	92.9	73.1	175.3	23.79	99.9	5.3	47	1.22	253	6.54	145	1.637	177	4.577	5	75	6.67	2	0	1	87	0	0	1	1	1	1	1	0	30	3	0	1
56276	10	14	25	8.93	97	5.38	7	416.4	1.4	123.76	2	65	1	1	1.2	7050.96	41.75	64	151.4	27.92	93.1	6.1	47	1.22	186	4.81	149	1.682	109	2.819	108.5	109	99.54	1	0	1	51	1	1	2	1	2	4	4	1	10	2	1	0
52647	66	70	15	5.36	94	5.22	6	356.9	0.94	83.1	1	43	1	3	0.33	18468.3	103.15	99.5	183	29.71	107.2	5	52	1.34	198	5.12	152	1.716	116	3	40	215	18.6	2	0	1	98	0	0	2	1	1	1	1	0	11.2	2	1	1
9779	63	46	12	4.3	200	11.102	6.7	398.5	0.6	53	1	43	1	4	2.75	4634.69	122.84	102.2	165.5	37.31	116.2	9.2	38	0.99	218	5.64	215	2.43	137	3.54	61.4	142	43.24	1	0	1	81	0	1	3	1	2	2	1	0	9.4	1	1	0
10440	61	77	8	2.86	88	4.885	5.5	327.1	0.8	70.72	1	46	4	2	0.44	15434.8	110.53	65.8	165	24.17	84.7	5.4	69	1.78	185	4.78	62	0.7	104	2.69	741	210	352.86	2	0	1	77	0	0	1	0	3	3	1	0	13.3	2	0	1
49428	61	32	13	4.64	84	4.66	5.5	327.1	1.12	99.01	1	36	3	3	0.58	23077.5	87.31	111	181.7	33.62	112	5.7	37	0.96	263	6.8	271	3.06	172	4.448	5.2	140	3.71	1	0	1	88	1	0	3	1	1	1	2	0	13.3	2	1	0
19829	60	48	16	5.71	98	5.44	7	416.4	1	88.4	1	57	3	3	5	28895.9	87.79	83.9	171.7	28.46	101.5	5.1	41	1.06	234	6.05	359	4.05	121	3.13	3.3	132	2.5	2	0	1	87	1	0	2	1	1	1	2	0	30	3	0	1
6148	51	31	20	7.1	84	4.663	7.1	422.3	0.9	79.6	1	70	5	4	0.8	11471.3	91.88	85	168.8	29.83	105.1	6.4	44	1.14	214	5.53	172	1.94	135	3.49	10.2	230	4.43	1	0	1	63	1	1	2	1	1	1	1	0	30	3	1	1
25371	46	35	14	5	98	5.44	5.1	303.3	1	88.4	1	59	1	3	4.89	14817.2	86.7	77.5	172.1	26.17	97.2	5.3	46	1.19	190	4.91	112	1.264	122	3.155	10.4	123	8.46	2	0	1	96	0	0	2	0	1	1	2	0	25.3	3	0	1
42197	43	45	10	3.57	115	6.38	5.5	327.1	0.92	81.33	1	65	1	4	2.19	8017.06	92.31	79.5	167.1	28.47	99	5.9	58	1.5	165	4.27	155	1.75	76	1.965	13	88	14.77	1	1	1	70	1	0	2	1	1	1	1	0	25.3	3	0	1
54470	38	46	14	5	119	6.61	11.9	707.8	1.42	125.53	1	67	4	4	2.79	10581	54.16	132.8	189.6	36.94	128.3	6.7	65	1.68	149	3.85	219	2.473	40	1.034	32.3	174	18.56	2	0	1	73	1	1	3	1	1	2	3	1	30	3	1	1
3935	37	35	13	4.6	96	5.329	6	356.9	0.6	53	2	65	3	4	2.67	23917.6	99.55	90.84	161.7	34.74	105.5	5.3	61	1.59	266	6.88	204	2.3	164	4.24	1.1	12	9.17	2	0	1	88	1	0	3	1	1	1	1	0	18.51	2	1	1
44706	37	28	11	3.93	87	4.83	5.3	315.2	0.89	78.68	1	50	1	3	2.24	13072.6	104.4	79	171.2	26.95	104.2	5.6	52	1.34	280	7.24	184	2.077	191	4.939	1.2	37	3.24	2	0	1	74	0	0	2	1	1	1	1	0	15.6	2	1	1
45171	36	29	11	3.93	86	4.77	7.5	446.1	1.2	106.08	1	61	3	4	5	55531.6	68.8	73.2	170.9	25.06	92.1	5.3	42	1.09	199	5.15	162	1.829	125	3.233	12.4	160	7.75	1	0	1	72	0	0	2	1	1	1	2	0	21.6	3	0	1
20840	35	31	16	5.71	200	11.102	4.6	273.6	0.8	70.72	1	80	3	5	3.77	7246.94	89.47	86.3	170.4	29.72	113	7	42	1.09	183	4.73	144	1.63	112	2.9	4.1	93	4.41	1	0	1	79	0	1	2	1	1	1	2	0	30	3	1	1
38038	35	34	11	3.93	92	5.11	7.4	440.2	1.3	114.92	1	34	4	2	2.51	21908.8	73.93	89.2	178.9	27.87	98.5	5	54	1.4	152	3.93	129	1.456	72	1.862	14.7	239	6.15	2	0	1	82	0	0	2	0	1	1	2	0	1.9	1	0	1
65423	34	28	10	3.57	108	6	6.4	380.7	0.74	65.42	1	50	1	1	2.24	21506.1	110.39	86.1	170.1	29.8	107.4	5.2	69	1.78	197	5.09	93	1.05	109	2.819	8.4	93	9.03	2	0	1	82	1	0	2	0	1	1	1	0	15.6	2	1	1
13482	32	18	15	5.36	81	4.496	4.9	291.5	0.7	61.88	1	26	3	2	1.98	28635.7	130.32	110.7	181.6	33.57	113.2	5.3	29	0.75	238	6.15	521	5.88	115	2.97	8.5	165	5.15	2	0	1	76	0	0	3	1	1	1	1	0	9.4	1	1	0
39903	32	29	13	4.64	105	5.83	8	475.8	1.1	97.24	1	36	4	5	5	15747.9	89.22	140.3	191.4	38.3	112.5	5.7	42	1.09	153	3.96	139	1.569	83	2.146	161	185	87.03	2	0	1	97	1	0	3	1	2	2	2	1	3.9	1	1	1
42135	31	18	9	3.21	280	15.54	5.1	303.3	0.66	58.34	1	50	3	2	2.88	24672.3	114.27	73.9	176.5	23.72	91.7	10.5	42	1.09	269	6.96	195	2.202	188	4.862	17.6	88	20	1	0	1	88	0	1	1	1	1	1	1	0	30	3	0	1
46059	31	29	17	6.07	99	5.5	6.6	392.6	1.23	108.73	2	73	5	3	3.36	37752.3	46.4	67.4	168	23.88	81	5.7	73	1.89	145	3.75	89	1.005	54	1.396	21.2	159	13.33	1	0	1	55	1	0	1	0	1	2	3	1	11.7	2	0	1
47890	31	25	13	4.64	96	5.33	7.5	446.1	0.92	81.33	1	33	5	5	5	64391.8	112.64	78.8	169.4	27.46	97.7	5.4	52	1.34	165	4.27	93	1.05	94	2.431	10.6	115	9.22	1	0	1	87	1	0	2	0	1	1	1	0	2.3	1	0	1
54159	31	28	7	2.5	96	5.33	6.3	374.7	0.7	61.88	1	37	1	3	4.37	22276.5	121.71	101.8	180.4	31.28	104.5	5.5	31	0.8	165	4.27	152	1.716	104	2.689	4.6	58	7.93	1	0	1	83	1	0	3	1	1	1	1	0	5.6	1	1	0
1035	29	26	16	5.7	102	5.662	4.9	291.5	0.7	61.9	2	52	1	5	5	5049.12	104	61.8	160.2	24.08	82.9	5.6	99	2.56	340	8.79	91	1.03	223	5.77	24.7	133	18.57	2	0	1	95	1	0	1	0	1	1	1	0	7.3	1	0	1
36148	29	28	13	4.64	109	6.05	7.6	452	1.2	106.08	1	44	4	3	1.81	16736.4	76.47	117.9	170.3	40.65	124.3	6.4	47	1.22	173	4.47	294	3.319	67	1.733	8.9	284	3.13	2	0	1	76	1	0	3	1	1	1	2	0	13.3	2	1	1
23703	28	30	8	2.86	90	5	5.9	350.9	1	88.4	1	65	4	3	2.14	11740.4	83.52	70.4	170.3	24.27	92.7	5.8	60	1.55	228	5.9	87	0.982	151	3.905	1.4	46	3.04	2	0	1	59	1	0	1	0	1	1	2	0	21.6	3	0	1
47120	28	25	13	4.64	83	4.61	5.9	350.9	1.02	90.17	1	37	4	5	3.39	22065.5	97.08	89.1	171.5	30.29	97.1	5.8	52	1.34	154	3.98	55	0.621	91	2.353	1.8	135	1.33	2	0	1	75	1	0	3	0	1	1	1	0	2.8	1	0	1
25262	27	22	13	4.64	88	4.88	6	356.9	1.1	97.24	1	26	2	3	2.58	65324.1	94.95	90.5	175.3	29.45	93.3	5.1	39	1.01	217	5.61	175	1.976	143	3.698	3.2	88	3.64	2	0	1	71	0	0	2	1	1	1	1	0	3.9	1	0	0
37179	27	32	13	4.64	93	5.16	3.6	214.1	0.9	79.56	1	81	3	3	2.17	20926	85.8	67.8	172.3	22.84	88.7	5.3	37	0.96	118	3.05	100	1.129	61	1.577	8.6	168	5.12	1	0	1	57	0	0	1	0	1	1	2	0	30	3	0	0
40317	27	37	14	5	114	6.33	8.9	529.4	0.8	70.72	1	60	3	4	3.64	63593.8	101.32	129.7	172.1	43.79	139.8	5.7	46	1.19	166	4.29	98	1.106	100	2.586	18.9	210	9	1	0	1	75	1	0	3	0	1	1	1	0	29.4	3	1	1
54463	27	23	13	4.64	95	5.27	4.4	261.7	0.64	56.58	2	68	3	4	3.43	62085.9	96.2	81.1	158.3	32.36	102.7	5.5	43	1.11	208	5.38	252	2.845	115	2.974	12.2	152	8.03	1	0	1	78	1	0	3	1	1	1	1	0	13.7	2	1	0
31734	25	29	12	4.28	147	8.16	3.8	226	1.2	106.08	1	64	1	4	5	7101.45	67.53	108.3	184.3	31.88	120.5	6.4	37	0.96	194	5.02	264	2.981	104	2.689	24.6	159	15.47	2	0	1	59	1	1	3	1	1	1	2	0	30	3	1	0
45561	25	27	20	7.14	105	5.83	4.5	267.7	0.82	72.49	2	79	3	3	1.52	19606	72.72	75.4	154.8	31.47	101.7	6	41	1.06	213	5.51	220	2.484	128	3.31	14.5	135	10.74	1	0	1	45	1	0	3	1	1	1	2	0	27.5	3	1	0
47833	25	16	11	3.93	95	5.27	6.8	404.5	0.82	72.49	1	35	3	3	0.69	23077.5	117.48	110.3	181.2	33.59	125.5	5.2	49	1.27	198	5.12	196	2.213	110	2.845	7.9	107	7.38	2	0	1	81	1	0	3	1	1	1	1	0	7.9	1	1	1
54607	25	23	19	6.78	106	5.88	6	356.9	1	88.4	1	70	1	1	1.2	12037.7	80.97	94.8	166.2	34.32	108	6.4	50	1.29	208	5.38	92	1.039	140	3.62	130.5	258	50.58	1	0	1	67	1	0	3	0	2	2	2	1	30	3	1	1
42918	24	28	16	5.71	85	4.72	5.5	327.1	0.72	63.65	2	60	1	2	0.46	8030.08	95.66	80.4	157.2	32.54	106.3	5.3	44	1.14	192	4.97	181	2.043	112	2.896	17.8	63	28.25	1	0	1	83	0	0	3	1	1	1	1	0	10	2	1	0
4300	23	21	15	5.4	89	4.94	5.4	321.2	0.8	70.7	1	44	1	1	0	5528.92	111.92	90.74	170.3	31.29	105.1	5	38	0.98	181	4.68	162	1.83	115	2.97	7.4	149	4.97	2	0	1	97	0	0	3	1	1	1	1	0	15.6	2	1	0
44588	23	24	13	4.64	95	5.27	5.8	345	1.12	99.01	1	53	3	4	4.97	76861.7	78.55	108.6	168.5	38.25	122.1	5.4	42	1.09	249	6.44	251	2.834	157	4.06	66.1	283	23.36	2	0	1	93	1	0	3	1	1	1	2	0	30	3	1	1
46885	23	22	16	5.71	99	5.5	6.1	362.8	0.82	72.49	2	70	1	1	1.39	9121.61	76.9	92.3	157.9	37.02	121.9	5.8	51	1.32	212	5.48	212	2.393	119	3.077	3.3	49	6.73	2	1	1	54	1	0	3	1	1	1	2	0	18.51	2	1	1
48589	23	21	14	5	101	5.61	5.7	339	0.72	63.65	2	55	4	4	1.69	22105.5	98.68	115.8	155.8	47.71	123.1	6.5	60	1.55	212	5.48	77	0.869	137	3.543	10.8	132	8.18	2	0	1	79	1	1	3	0	1	1	1	0	11.7	2	1	1
61482	23	27	13	4.64	79	4.39	5.1	303.3	0.68	60.11	2	59	3	3	3.77	93958.5	100.26	91.8	164.4	33.97	113.2	5.1	40	1.03	314	8.12	425	4.798	115	2.97	7	133	5.26	2	0	1	77	0	0	3	1	1	1	1	0	13.7	2	1	0
16445	22	23	16	5.71	112	6.217	8.2	487.7	0.8	70.72	2	72	2	1	0.78	24655.5	78.24	40.7	152.4	17.52	70	5.6	57	1.47	244	6.31	440	4.97	115	2.97	5.2	40	13	2	1	1	73	1	0	1	1	1	1	2	0	30	3	0	1
40963	22	19	17	6.07	116	6.44	6.3	374.7	1.4	123.76	1	55	3	5	2.65	83470.2	59.36	131.4	182	39.67	138.7	5.9	48	1.24	276	7.14	180	2.032	192	4.965	3.2	79	4.05	2	1	1	84	1	0	3	1	1	2	3	1	29.4	3	1	1
56164	22	23	18	6.43	97	5.38	6.7	398.5	0.7	61.88	2	62	5	4	0.92	20888	97.73	109.1	158.3	43.54	111.3	5.6	64	1.66	250	6.47	92	1.039	168	4.344	5.6	29	19.31	2	1	1	84	1	0	3	0	1	1	1	0	13.7	2	1	1
13604	21	24	20	7.14	90	4.996	3.9	232	0.7	61.88	2	67	3	2	1.89	18257.9	94.73	63.9	156.7	26.02	73.8	5.4	80	2.07	246	6.36	49	0.55	156	4.03	7.4	111	6.67	2	0	1	77	0	0	2	0	1	1	1	0	10	2	0	1
40007	21	22	10	3.57	122	6.77	7.2	428.3	1.1	97.24	1	69	3	4	3.99	71671.2	72.67	91.9	178.4	28.88	108.2	6.1	65	1.68	223	5.77	135	1.524	131	3.388	26.5	214	12.38	2	0	1	67	1	0	2	1	1	1	2	0	30	3	1	1
41579	21	28	11	3.93	104	5.77	4.4	261.7	0.8	70.72	2	71	3	3	3	55839.5	78.72	52.7	166	19.12	83.2	5.8	83	2.15	268	6.93	150	1.694	155	4.008	10	143	6.99	2	0	1	82	1	0	1	1	1	1	2	0	18.51	2	0	1
50558	20	20	16	5.71	85	4.72	6.2	368.8	0.92	81.33	1	79	1	1	1.03	10840.5	84.62	67.6	162.6	25.57	103.1	5.6	49	1.27	252	6.52	113	1.276	180	4.655	7.5	38	19.74	1	0	1	83	0	0	2	0	1	1	2	0	30	3	1	1
53385	20	25	13	4.64	117	6.49	8.1	481.8	1.03	91.05	1	77	3	3	2.75	41159.8	74.82	94.3	173.2	31.44	108.3	5.7	45	1.16	266	6.88	122	1.377	197	5.094	3.4	97	3.51	2	0	1	71	1	0	3	0	1	1	2	0	30	3	1	1
57570	20	30	14	5	83	4.61	3.9	232	0.89	78.68	2	67	3	5	4.62	53452.8	71.02	50.6	153.4	21.5	73.2	5.9	76	1.97	259	6.7	108	1.219	161	4.163	21.7	169	12.84	2	0	1	63	1	0	1	0	1	1	2	0	15.9	2	0	1
1988	18	17	17	6.1	85	4.718	5.2	309.3	0.6	53	2	49	1	1	0.72	4172	109.96	72.6	161	28.01	89.1	5	41	1.06	240	6.21	404	4.56	115	2.97	6.3	139	4.53	1	0	1	89	0	0	2	1	1	1	1	1	18.51	2	1	0
20553	18	23	11	3.93	115	6.384	6.6	392.6	0.8	70.72	1	52	3	2	5	30344.9	106.48	95.4	177.6	30.25	113.3	5	42	1.09	247	6.39	68	0.77	191	4.94	12.8	219	5.84	2	0	1	87	1	0	3	0	1	1	1	0	18.4	2	1	1
30450	18	22	10	3.57	93	5.16	3.7	220.1	0.6	53.04	2	42	1	1	0.96	13868.6	114.86	62.3	156.5	25.44	90	5.5	70	1.81	215	5.56	104	1.174	124	3.207	11	42	26.19	2	0	1	86	0	0	2	0	1	1	1	0	3.3	1	1	1
4037	18	16	13	4.6	151	8.382	3.9	232	0.5	44.2	2	79	3	2	0.89	27914.7	95.35	59.4	155.3	24.63	96	7.7	46	1.2	197	5.09	210	2.37	109	2.82	5.8	30	19.33	1	0	1	51	0	1	1	1	1	1	1	0	30	3	1	0
50580	18	18	10	3.57	85	4.72	5	297.4	0.82	72.49	2	41	3	4	2.91	65721.7	92.1	86.3	164.5	31.89	100	5.5	52	1.34	211	5.46	131	1.479	133	3.439	12.7	161	7.89	2	0	1	87	0	0	3	0	1	1	1	0	6.3	1	1	1
61442	18	20	13	4.64	97	5.38	3.4	202.2	0.45	39.78	2	52	3	4	3.51	105915	115.68	60.6	157.4	24.46	90.4	5.6	88	2.28	229	5.92	61	0.689	129	3.336	21	121	17.36	2	0	1	91	0	0	1	0	1	1	1	0	7.3	1	1	1
62764	18	18	8	2.86	96	5.33	4.6	273.6	0.75	66.3	2	51	2	3	0.36	22969.1	96.33	102	144.8	48.6	122.5	5.9	52	1.34	233	6.03	109	1.231	159	4.112	7.1	74	9.59	2	0	1	79	1	0	3	0	1	1	1	0	6.3	1	1	1
65009	18	27	14	5	126	6.99	4.4	261.7	0.72	63.65	2	51	4	4	1.41	21491.1	101.17	160.9	169.8	55.8	155.9	5.5	79	2.04	172	4.45	59	0.666	81	2.095	9.8	197	4.97	2	1	1	41	1	0	3	0	1	1	1	0	7.3	1	1	1
43073	17	22	13	4.64	97	5.38	6.6	392.6	0.98	86.63	1	75	3	3	1.57	13578.1	80.41	78.4	172.9	26.23	101.7	5.5	54	1.4	170	4.4	126	1.423	91	2.353	10.2	123	8.29	2	0	1	66	1	0	2	0	1	1	2	0	30	3	0	1
47404	17	22	17	6.07	85	4.72	5.3	315.2	1.22	107.85	1	50	4	5	3.87	49253.1	72.23	110.7	181.4	33.64	109.8	5.5	45	1.16	196	5.07	85	0.96	134	3.465	5	139	3.6	2	0	1	84	0	0	3	0	1	1	2	0	13.3	2	1	1
54364	17	15	11	3.93	111	6.16	7.1	422.3	0.81	71.6	1	61	3	1	1.72	22909.3	100.31	89.8	174.5	29.49	117	6	43	1.11	237	6.13	104	1.174	173	4.474	28.8	120	24	1	0	1	77	1	0	2	0	1	1	1	0	30	3	1	1
8322	17	19	71	25.3	93	5.162	8.1	481.8	5.3	468.5	1	28	3	4	4.85	31566.9	14.21	96.7	199.8	24.22	103.9	4.9	36	0.93	166	4.29	160	1.81	98	2.53	79	101	78.22	2	0	1	77	0	0	1	1	2	4	6	1	9.4	1	1	0
45989	16	20	22	7.85	106	5.88	7.8	463.9	0.97	85.75	2	80	3	3	1.44	36166	59.07	68.1	151.4	29.71	98.4	5.3	42	1.09	149	3.85	252	2.845	57	1.474	6.6	92	7.17	1	0	1	57	1	0	2	1	1	2	3	1	13.7	2	1	0
12816	14	21	12	4.28	88	4.885	4.9	291.5	0.9	79.56	2	30	4	3	2.27	14383	88.2	91.2	161.9	34.79	90.5	5.3	160	4.14	325	8.4	51	0.58	155	4.01	5.1	112	4.55	1	0	1	76	0	0	3	0	1	1	2	0	2.4	1	1	1
46028	14	19	16	5.71	94	5.22	3.4	202.2	0.88	77.79	2	80	3	3	1.68	37845.9	66.39	62.5	149.4	28	95.6	5.4	79	2.04	247	6.39	102	1.152	148	3.827	14.2	43	33.02	1	0	1	63	1	0	2	0	2	2	2	1	21.5	3	1	1
49256	14	21	11	3.93	99	5.5	4.6	273.6	1.01	89.28	1	58	3	3	2.14	25211.3	86.21	85.9	177	27.42	105.4	5.6	44	1.14	160	4.14	95	1.073	97	2.508	8	168	4.76	2	0	1	79	1	0	2	0	1	1	2	0	30	3	1	1
58036	14	19	20	7.14	95	5.27	7.2	428.3	0.95	83.98	2	80	4	5	1.66	12778.3	60.57	61.5	164.1	22.84	88.9	5.6	59	1.53	169	4.37	87	0.982	93	2.405	13.2	137	9.64	1	0	1	58	1	0	1	0	1	1	2	0	18.51	2	1	1
61951	14	20	24	8.57	94	5.22	6.5	386.6	1.03	91.05	2	80	2	1	0.91	11105.6	54.97	69.4	144.5	33.24	106.5	6	72	1.86	233	6.03	99	1.118	141	3.646	8.5	94	9.04	1	0	1	59	1	0	3	0	1	2	3	1	27.5	3	1	1
57914	13	23	13	4.64	95	5.27	3.9	232	1.03	91.05	2	79	3	4	2.4	33552	55.31	51.3	156.6	20.92	77.1	5.6	78	2.02	155	4.01	78	0.881	61	1.577	23.2	130	17.85	2	0	1	63	0	0	1	0	1	2	3	1	13.7	2	0	1
63579	13	18	45	16.07	152	8.44	4.7	279.6	7.46	659.46	1	63	3	3	2.41	120735	7.58	65.4	163.9	24.3	88.3	8.1	70	1.81	148	3.83	69	0.779	64	1.655	225	115	195.65	2	0	1	73	0	1	1	0	2	4	6	1	11.2	2	0	1
26375	12	18	11	3.93	95	5.27	4.3	255.8	0.7	61.88	2	36	3	1	0.56	87418.8	114.88	76.1	149.2	34.19	99	5.3	53	1.37	162	4.19	124	1.4	84	2.172	4.6	20	23	1	0	1	91	0	0	3	0	1	1	1	0	2.4	1	1	1
7861	12	18	14	5	77	4.274	3.7	220.1	0.5	44.2	2	77	1	1	1.24	1688.78	96.54	56.54	133.9	31.54	101.3	7.5	57	1.48	169	4.37	119	1.34	88	2.28	2.4	36	6.67	1	0	1	67	0	1	3	0	1	1	1	0	18.51	2	1	1
48504	11	17	9	3.21	130	7.22	4.1	243.9	0.81	71.6	2	70	3	2	1.01	25886.3	78.04	52	158.2	20.78	76.4	6.5	43	1.11	125	3.23	96	1.084	63	1.629	7.2	53	13.58	1	1	1	58	0	1	1	0	1	1	2	0	18.51	2	0	0
60355	9	20	12	4.28	83	4.61	3.5	208.2	0.7	61.88	2	27	3	4	2.46	88886	121.49	93.8	158.8	37.2	99.3	5	62	1.6	233	6.03	60	0.677	159	4.112	4.9	68	7.21	2	0	1	83	0	0	3	0	1	1	1	0	2	1	1	1
6938	181	166	14	5	102	5.662	7.7	458	0.6	53	1	53	1	2	2.39	5142.74	115.43	79.9	167.5	28.48	96.4	5.2	56	1.45	219	5.66	109	1.23	141	3.65	9.3	115	8.09	2	0	1	93	1	0	2	0	1	1	1	0	11.2	2	0	1
49888	180	132	11	3.93	103	5.72	5.2	309.3	0.79	69.84	1	49	2	2	0.67	20781	108.9	84.2	177.4	26.75	94.5	5.4	40	1.03	155	4.01	93	1.05	96	2.483	3.2	45	7.11	2	0	1	87	1	0	2	0	1	1	1	0	9.4	1	0	1
8027	99	45	17	6.1	92	5.107	5.8	345	0.8	70.7	1	37	1	3	4.07	11233.1	116.9	80.2	166.9	28.79	92.6	5	46	1.2	250	6.47	229	2.59	158	4.09	24.7	302	8.18	2	0	1	95	0	0	2	1	1	1	1	0	5.6	1	0	1
17777	98	69	14	5	89	4.94	6.4	380.7	0.8	70.72	2	58	3	5	5	43879.9	85.35	56.7	161.6	21.71	80.7	5.3	70	1.81	350	9.05	318	3.59	216	5.59	1.4	36	3.89	2	0	1	81	0	0	1	1	1	1	2	0	7.3	1	0	1
38860	87	49	10	3.57	110	6.11	3.6	214.1	0.8	70.72	2	54	3	2	4.55	93843.8	87.5	69	162.3	26.19	90.7	5.8	54	1.4	222	5.74	113	1.276	145	3.75	12.8	190	6.74	2	0	1	84	1	0	2	0	1	1	2	0	10	2	1	1
48342	86	30	8	2.86	93	5.16	6.3	374.7	0.92	81.33	1	31	4	3	2.91	20009.8	114.05	83.6	172.8	28	96.4	5.4	43	1.11	210	5.43	100	1.129	147	3.801	6.2	147	4.22	2	0	1	91	1	0	2	0	1	1	1	0	7.9	1	0	1
40475	67	133	17	6.07	75	4.16	3.9	232	4.3	380.12	2	51	4	3	0.83	20480.4	11.85	59.8	155.3	24.79	78.5	4.8	62	1.6	137	3.54	98	1.106	55	1.422	42.3	87	48.62	1	0	1	86	0	0	1	0	2	4	6	1	7.3	1	0	1
55451	53	43	20	7.14	92	5.11	4.4	261.7	0.78	68.95	1	55	3	1	0.85	24638.7	105.32	73.4	162.2	27.9	95.1	4.4	50	1.29	220	5.69	100	1.129	150	3.879	3.2	62	5.16	2	0	1	86	1	0	2	0	1	1	1	0	30	3	0	1
4912	50	54	8	2.9	88	4.885	8.1	481.8	0.6	53	1	25	3	2	1.24	48151.7	137.39	81.3	170.7	27.9	95.3	4.6	91	2.34	198	5.12	69	0.78	115	2.97	5.7	99	5.76	2	0	1	93	0	0	2	0	1	1	1	0	1.9	1	0	1
14815	45	49	9	3.21	154	8.549	6.6	392.6	0.9	79.56	1	57	1	3	3.04	5990.5	99.62	114	171.8	38.62	125.1	6.3	47	1.22	235	6.08	175	1.98	153	3.96	1.9	34	5.59	2	0	1	72	1	1	3	1	1	1	1	0	30	3	1	1
64621	43	27	9	3.21	82	4.55	5.5	327.1	0.81	71.6	1	38	2	5	4.71	39053.2	115.74	81.7	174.2	26.9	104	5	44	1.14	241	6.23	193	2.179	158	4.086	4.2	55	7.64	2	0	1	93	0	0	2	1	1	1	1	0	13.3	2	1	1
2660	40	23	18	6.4	77	4.274	8	475.8	1	88.4	1	42	3	5	4.93	49121.8	96.37	110.9	184.5	32.58	116.2	5.4	34	0.87	206	5.33	173	1.95	138	3.57	69.1	58	119.14	2	0	1	92	0	0	3	1	2	2	1	0	11.2	2	1	0
64013	40	33	17	6.07	151	8.38	6.9	410.4	1.14	100.78	1	80	5	5	0.69	8606.12	65.01	83.9	175.1	27.4	105.3	6.5	54	1.4	193	4.99	84	0.948	122	3.155	6.2	89	6.97	2	0	1	53	0	1	2	0	1	1	2	0	30	3	1	1
52086	39	44	13	4.64	101	5.61	7	416.4	1.01	89.28	1	68	5	5	5	19817.3	81.01	74.4	175.1	24.27	94	6	45	1.16	132	3.41	133	1.502	60	1.552	5.8	117	4.96	1	0	1	72	1	0	1	0	1	1	2	0	29.4	3	0	1
61435	39	33	14	5	95	5.27	4.4	261.7	1.06	93.7	1	52	3	4	3.6	75085.7	84.44	67.7	174.2	22.31	82.5	5.9	39	1.01	175	4.53	127	1.434	111	2.87	4.7	94	5	1	0	1	77	1	0	1	0	1	1	2	0	25.3	3	0	0
57022	38	28	15	5.36	97	5.38	7.5	446.1	1.06	93.7	1	61	3	3	2.33	67498.5	79.85	72.1	176.5	23.14	92.7	5.3	42	1.09	200	5.17	195	2.202	119	3.077	2.7	67	4.03	2	0	1	83	1	0	1	1	1	1	2	0	30	3	0	1
58978	38	48	7	2.5	244	13.54	3.9	232	0.56	49.5	2	41	3	4	1.15	18106.1	117.51	106.6	165.2	39.06	125	8.8	28	0.72	130	3.36	230	2.597	56	1.448	86.9	109	79.72	1	0	1	81	0	1	3	1	2	2	1	0	7.3	1	1	0
53505	37	24	13	4.64	91	5.05	5.3	315.2	0.91	80.44	1	48	3	3	1.2	19712.4	103.96	142.1	182.2	42.81	135	5.7	42	1.09	243	6.28	112	1.264	179	4.629	8.5	117	7.26	1	0	1	101	1	0	3	0	1	1	1	0	29.4	3	1	1
65485	37	26	14	5	87	4.83	6.8	404.5	0.86	76.02	1	42	3	4	1.03	30407.5	110.87	118.8	173.6	39.4	124.9	5.2	52	1.34	215	5.56	88	0.994	145	3.75	11.6	182	6.37	2	0	1	75	0	0	3	0	1	1	1	0	6.7	1	1	1
18717	36	26	12	4.28	79	4.385	6.4	380.7	1.2	106.08	1	46	4	2	0.91	11669.6	75.53	80.4	181	24.54	90.2	4.7	51	1.32	181	4.68	94	1.06	111	2.87	12.3	107	11.5	2	0	1	72	0	0	1	0	1	1	2	0	15.6	2	0	1
31512	36	23	13	4.64	103	5.72	6.6	392.6	0.7	61.88	1	51	1	1	0.57	20993.1	111.56	81.7	161.5	31.32	105.6	6.3	41	1.06	223	5.77	297	3.353	123	3.181	23.1	95	24.32	2	0	1	88	1	0	3	1	1	1	1	0	29.4	3	1	1
54923	36	30	20	7.14	99	5.5	7.3	434.2	1.06	93.7	1	60	1	4	5	6438.29	80.34	159.1	188.6	44.73	140.7	5.9	36	0.93	231	5.97	213	2.405	152	3.931	4.9	58	8.45	2	0	1	73	1	0	3	1	1	1	2	0	30	3	1	0
7994	36	44	17	6.1	104	5.773	6.7	398.5	1.3	114.9	1	81	3	3	2.93	6214.58	55.19	72.8	172.7	24.41	95	5	95	2.46	223	5.77	51	0.58	118	3.05	72.5	116	62.5	2	0	1	77	1	0	1	0	2	3	3	1	30	3	0	1
50591	33	22	10	3.57	85	4.72	5.1	303.3	0.82	72.49	1	37	3	5	4.97	66713.2	116.03	91.4	180	28.21	102	4.5	44	1.14	153	3.96	155	1.75	78	2.017	20.3	123	16.5	2	0	1	99	0	0	2	1	1	1	1	0	3.9	1	1	1
56328	33	29	15	5.36	98	5.44	7.5	446.1	0.93	82.21	1	47	5	1	4.04	95086.5	101.92	87.6	174.7	28.7	100	5.4	38	0.98	175	4.53	78	0.881	121	3.129	5	89	5.62	1	0	1	83	1	0	2	0	1	1	1	0	15.6	2	0	0
8535	33	28	17	6.1	107	5.94	5.1	303.3	0.8	70.7	1	70	1	1	1.33	1003.37	95.21	94.7	166.9	34	112.1	5.7	43	1.1	193	4.99	147	1.66	121	3.13	57.8	169	34.2	2	1	1	83	1	0	3	1	2	2	1	0	30	3	1	1
3436	32	33	14	5	103	5.718	5	297.4	0.6	53	2	63	1	1	1.94	1956.1	100.8	78	155.8	32.13	112	5.7	53	1.36	131	3.39	205	2.31	37	0.96	5.9	121	4.88	1	0	1	68	1	0	3	1	1	1	1	0	6.3	1	1	1
42009	31	39	6	2.14	90	5	4.7	279.6	0.65	57.46	2	38	3	3	0.57	30711.4	115.5	84.7	163.1	31.84	106.3	5.5	110	2.84	211	5.46	66	0.745	88	2.276	36.6	78	46.92	1	0	1	102	1	0	3	0	2	2	1	0	3.9	1	1	1
61353	31	36	8	2.86	126	6.99	2.7	160.6	1.01	89.28	1	54	2	2	0.67	14464.5	88.38	69.5	165.6	25.34	88.3	5.4	58	1.5	176	4.55	77	0.869	103	2.664	8.6	64	13.44	2	0	1	80	0	1	2	0	1	1	2	0	9.4	1	0	1
8952	31	30	14	5	95	5.273	5.9	350.9	0.9	79.6	1	31	4	2	1.63	18972.9	117.1	125.1	189.1	34.98	111.5	5.5	64	1.65	200	5.17	102	1.15	116	3	4.7	177	2.66	2	0	1	76	0	0	3	0	1	1	1	0	3.9	1	1	1
48270	30	22	15	5.36	94	5.22	6.8	404.5	0.88	77.79	1	31	3	2	2.42	60513	117.9	101.9	174.4	33.5	104.1	5	46	1.19	203	5.25	105	1.185	136	3.517	0.5	50	1	2	0	1	89	1	0	3	0	1	1	1	0	3.9	1	1	1
53515	30	22	7	2.5	94	5.22	6.1	362.8	1.05	92.82	1	41	3	3	4.08	66796.4	91.46	105.1	182.5	31.56	107.5	5.3	42	1.09	255	6.59	98	1.106	193	4.991	9.3	155	6	2	0	1	74	1	0	3	0	1	1	1	0	21.6	3	1	1
25553	29	24	8	2.86	99	5.5	4.7	279.6	0.9	79.56	1	49	3	3	0.14	111798	104.7	73.7	170.6	25.32	95.7	5.2	38	0.98	162	4.19	117	1.321	101	2.612	6.2	221	2.81	2	0	1	76	1	0	2	0	1	1	1	0	21.6	3	0	0
29003	28	24	11	3.93	90	5	6.3	374.7	1	88.4	1	42	3	3	3.51	98532.8	96.37	96.9	184.4	28.5	104.6	4.9	59	1.53	204	5.28	79	0.892	129	3.336	3.7	104	3.56	2	0	1	91	0	0	2	0	1	1	1	0	6.7	1	1	1
38236	28	25	9	3.21	111	6.16	6.5	386.6	1	88.4	1	41	3	1	0.6	33122.5	96.97	85.3	177.1	27.2	93.5	5.5	31	0.8	167	4.32	282	3.184	80	2.069	9.3	217	4.29	2	0	1	87	1	0	2	1	1	1	1	0	18.4	2	0	0
60195	28	33	15	5.36	118	6.55	5.2	309.3	1.12	99.01	1	65	1	4	5	7959.04	72.9	63.3	164.5	23.39	92.4	5.9	41	1.06	124	3.21	75	0.847	68	1.758	2.6	79	3.29	1	1	1	65	1	0	1	0	1	1	2	0	29.4	3	0	1
60562	28	29	17	6.07	93	5.16	5.7	339	0.94	83.1	1	49	4	5	1.47	28574.2	99.37	87.4	177.1	27.87	98.3	5	48	1.24	204	5.28	134	1.513	129	3.336	0.9	36	2.5	1	0	1	88	0	0	2	0	1	1	1	0	15.6	2	0	1
62295	28	37	18	6.43	115	6.38	9.3	553.2	0.92	81.33	2	69	2	2	0.79	9716.81	67.4	79.2	155.7	32.7	103.5	6	40	1.03	237	6.13	286	3.229	140	3.62	1060	129	821.71	1	0	1	77	1	0	3	1	3	3	2	1	21.5	3	1	0
21962	27	28	13	4.64	99	5.5	8.3	493.7	1	88.4	1	51	3	4	4.8	104202	91.12	112.5	173.4	37.42	114.1	5.5	40	1.03	206	5.33	136	1.535	139	3.595	7.4	192	3.85	1	0	1	84	1	0	3	1	1	1	1	0	15.6	2	1	1
13149	26	25	13	4.64	88	4.885	7.8	463.9	0.9	79.56	2	41	3	3	3.97	49002.6	82.37	80.1	168.2	28.31	98.5	4.8	88	2.28	215	5.56	104	1.17	106	2.74	5.2	140	3.71	2	1	1	90	0	0	2	0	1	1	2	0	5.3	1	1	1
16938	26	26	9	3.21	97	5.384	4.8	285.5	0.6	53.04	2	66	1	4	5	1941.59	98.93	66.8	154.8	27.88	98.6	5.9	40	1.03	212	5.48	414	4.67	115	2.97	8.3	108	7.69	2	0	1	81	1	0	2	1	1	1	1	0	30	3	1	0
21177	26	27	8	2.86	92	5.11	5.1	303.3	0.8	70.72	2	43	4	4	2.67	25663.5	93.7	76.4	152.7	32.77	102.9	4.9	39	1.01	235	6.08	257	2.902	145	3.75	159.5	163	97.85	2	1	1	95	0	0	3	1	2	2	1	1	13.7	2	1	0
23227	26	24	11	3.93	92	5.11	6.1	362.8	0.8	70.72	2	68	3	4	5	65614.9	80.21	83.3	165.7	30.34	110	5.4	102	2.64	226	5.84	109	1.231	102	2.638	2.7	42	6.43	2	0	1	84	0	0	3	0	1	1	2	0	21.5	3	1	1
40065	26	32	14	5	114	6.33	7.2	428.3	1	88.4	2	63	4	4	4.49	18974	63.3	132.7	165.3	48.57	132.3	6.2	52	1.34	227	5.87	156	1.761	144	3.724	16.3	181	9.01	1	1	1	77	1	0	3	1	1	1	2	0	7.3	1	1	1
46348	26	27	9	3.21	252	13.99	5.4	321.2	0.92	81.33	1	58	4	2	4.37	22436.1	96.42	128.5	177.9	40.6	133.1	7.9	60	1.55	227	5.87	205	2.314	126	3.258	15.6	153	10.2	1	0	1	85	0	1	3	1	1	1	1	0	30	3	1	1
761	26	25	13	4.6	103	5.718	3.6	214.1	0.6	53	2	67	3	3	2.71	26523.5	98.32	65.1	167.7	23.15	89.5	5.2	66	1.7	297	7.68	116	1.31	208	5.38	6.3	85	7.41	1	0	1	64	0	0	1	0	1	1	1	0	11.7	2	1	1
13219	25	28	4	1.43	97	5.384	7.6	452	1	88.4	1	39	4	4	3.3	12099.9	98.18	104.1	178.9	32.53	108.2	5.4	37	0.96	230	5.95	185	2.09	156	4.03	12.2	310	3.94	2	0	1	101	1	0	3	1	1	1	1	0	5.6	1	1	0
26647	25	25	17	6.07	138	7.66	4.9	291.5	1	88.4	1	80	3	3	5	19775.3	76.08	92.5	161.6	35.42	116.2	6	44	1.14	164	4.24	141	1.592	92	2.379	10.7	97	11.03	2	1	1	53	1	1	3	1	1	1	2	0	30	3	1	1
38588	25	30	14	5	90	5	4.8	285.5	0.7	61.88	2	61	3	4	5	63114.7	98.33	54.1	170	18.72	75.3	5.1	71	1.84	198	5.12	46	0.519	118	3.051	2.9	16	18.13	2	0	1	73	0	0	1	0	1	1	1	0	10	2	0	1
17771	24	17	15	5.36	162	8.993	6.8	404.5	0.7	61.88	2	53	4	5	3.14	9414.39	103.35	73.6	155.7	30.36	97.8	8.3	36	0.93	143	3.7	93	1.05	88	2.28	409	169	242.01	2	0	1	73	0	1	3	0	2	2	1	0	15.9	2	1	0
29676	24	21	14	5	111	6.16	6.7	398.5	1.1	97.24	1	51	3	3	5	76894.6	81.27	98.9	176.1	31.89	114.6	5.5	70	1.81	197	5.09	109	1.231	105	2.715	4.6	175	2.63	2	0	1	83	1	0	3	0	1	1	2	0	21.6	3	1	1
51347	24	21	17	6.07	123	6.83	5.2	309.3	0.92	81.33	1	64	4	2	0.73	7237.07	92.89	79.3	174.9	25.92	88.4	5.6	48	1.24	154	3.98	30	0.339	100	2.586	3.8	91	4.18	1	0	1	72	0	1	2	0	1	1	1	0	15.6	2	0	1
65500	24	39	10	3.57	97	5.38	4.7	279.6	1	88.4	1	46	4	3	4.82	17787.5	94	94.6	173.1	31.6	98.6	5.8	42	1.09	224	5.79	145	1.637	153	3.957	18.3	196	9.34	1	0	1	87	1	0	3	1	1	1	1	0	13.3	2	0	1
31079	23	23	16	5.71	97	5.38	5.9	350.9	0.8	70.72	1	64	1	2	1.97	2394.09	98.83	100.8	176.7	32.28	118.1	5.5	45	1.16	210	5.43	98	1.106	145	3.75	11	225	4.89	2	0	1	65	0	0	3	0	1	1	1	0	30	3	1	1
43353	23	31	23	8.21	90	5	5.5	327.1	1.02	90.17	2	71	3	3	2.92	35990.3	58.82	45.3	160.8	17.52	80.4	5.4	104	2.69	216	5.59	78	0.881	96	2.483	11.5	112	10.27	2	0	1	79	0	0	1	0	1	2	3	1	24.8	3	0	1
55020	23	27	16	5.71	97	5.38	7.8	463.9	1.15	101.66	1	47	3	3	3.85	87895.6	78.99	86.4	177.5	27.42	93.2	5.6	47	1.22	215	5.56	123	1.389	143	3.698	7.2	123	5.85	1	0	1	89	1	0	2	0	1	1	2	0	11.2	2	0	1
56969	23	23	12	4.28	92	5.11	8.2	487.7	0.92	81.33	1	68	1	2	0.55	6371.79	90.61	88.3	168	31.29	110.9	5.7	26	0.67	190	4.91	191	2.156	126	3.258	7.9	172	4.59	2	0	1	73	1	0	3	1	1	1	1	0	30	3	1	0
57238	23	27	31	11.07	104	5.77	7.4	440.2	1.29	114.04	1	80	3	3	3.09	21842.2	56.05	83.1	158.2	33.2	110.7	5.8	44	1.14	117	3.03	82	0.926	57	1.474	7.2	91	7.91	2	1	1	56	1	0	3	0	1	2	3	1	30	3	1	1
61052	23	28	12	4.28	79	4.39	5.4	321.2	0.89	78.68	1	47	3	4	3	21121.3	106.37	75.3	177.9	23.79	89.5	5.2	50	1.29	136	3.52	62	0.7	74	1.914	11.6	122	9.51	2	0	1	69	0	0	1	0	1	1	1	0	15.6	2	0	1
2326	22	31	16	5.7	94	5.218	5.4	321.2	0.8	70.7	2	56	3	3	4.44	38414.5	86.42	73.9	169.1	25.84	88.1	5.5	54	1.39	315	8.15	135	1.52	234	6.05	4	89	4.49	2	0	1	76	0	0	2	1	1	1	2	0	10	2	1	1
37743	22	27	13	4.64	99	5.5	5.4	321.2	1.4	123.76	1	63	4	3	5	6287.29	56.48	70.1	167.9	24.87	91.8	6	93	2.4	291	7.53	62	0.7	186	4.81	13.9	244	5.7	1	0	1	75	1	0	1	0	1	2	3	1	30	3	0	1
38454	22	25	8	2.86	92	5.11	6	356.9	1.1	97.24	1	72	3	4	0.92	18301.2	71.32	68.5	167.3	24.47	95	5.3	39	1.01	220	5.69	150	1.694	151	3.905	8.8	199	4.42	1	0	1	70	0	0	1	1	1	1	2	0	30	3	0	0
48594	22	24	16	5.71	81	4.5	6.2	368.8	0.8	70.72	2	68	1	1	1.29	8975.58	80.21	75.7	154.5	31.71	107.2	6	51	1.32	159	4.11	117	1.321	85	2.198	7	82	8.54	2	1	1	67	1	0	3	0	1	1	2	0	21.5	3	1	1
53604	22	23	11	3.93	89	4.94	4.6	273.6	0.91	80.44	2	63	3	5	2.95	64451.2	70.89	73.4	168	26.01	101.2	5.9	68	1.76	237	6.13	100	1.129	149	3.853	3.1	53	5.85	2	0	1	65	1	0	2	0	1	1	2	0	11.7	2	1	1
57890	22	22	20	7.14	85	4.72	5	297.4	0.8	70.72	1	77	3	4	0.82	7627.93	91.15	65.2	169.2	22.77	92.6	5.3	41	1.06	186	4.81	94	1.061	126	3.258	8	196	4.08	2	0	1	58	0	0	1	0	1	1	1	0	30	3	0	1
64494	22	19	6	2.14	109	6.05	3	178.4	0.6	53.04	2	39	4	5	4.1	28546.1	117.02	97.3	158.5	38.7	109.1	6.3	36	0.93	216	5.59	44	0.497	171	4.422	12.3	163	7.55	1	0	1	88	1	0	3	0	1	1	1	0	6.3	1	1	0
65431	22	22	18	6.43	109	6.05	5	297.4	1.27	112.27	1	73	4	4	1.47	8497.91	59.65	70.9	167.1	25.4	92.7	6	73	1.89	179	4.63	76	0.858	91	2.353	37.1	198	18.74	2	1	1	35	1	0	2	0	1	2	3	1	30	3	0	1
17727	21	20	20	7.14	106	5.884	3.4	202.2	0.7	61.88	2	47	3	4	4.99	48323.8	107.28	73	165.2	26.75	97.8	5.1	47	1.22	236	6.1	63	0.71	176	4.55	4.3	48	8.96	2	0	1	91	1	0	2	0	1	1	1	0	5.3	1	1	0
22296	21	19	11	3.93	172	9.55	6.1	362.8	1	88.4	1	70	4	1	2.6	14581.2	80.97	104.8	181.5	31.81	109.5	7.2	42	1.09	178	4.6	186	2.1	99	2.56	5.1	107	4.77	1	0	1	75	0	1	3	1	1	1	2	0	30	3	1	1
30119	21	21	7	2.5	99	5.5	4.9	291.5	0.7	61.88	2	46	3	4	0.14	123125	107.95	81.7	161.8	31.21	96.2	5.6	38	0.98	190	4.91	107	1.208	131	3.388	1.8	34	5.29	2	0	1	79	0	0	3	0	1	1	1	0	5.3	1	1	0
38148	21	33	9	3.21	81	4.5	4.3	255.8	0.7	61.88	2	54	3	3	2.1	119049	102.71	64.9	157.6	26.13	86.9	5.1	56	1.45	226	5.84	76	0.858	155	4.008	22.5	101	22.28	1	0	1	75	0	0	2	0	1	1	1	0	6.3	1	0	1
41454	21	29	36	12.85	188	10.44	7.5	446.1	1.7	150.28	1	66	3	4	2.6	32389.1	43.91	105.2	177.1	33.54	123.3	8.7	17	0.44	128	3.31	325	3.669	46	1.19	385	61	631.15	1	1	1	45	0	1	3	1	3	4	4	1	30	3	1	0
49589	21	18	7	2.5	98	5.44	5.6	333.1	0.78	68.95	2	50	3	2	3.92	109493	92.47	116	173.7	38.45	113.8	5.6	35	0.91	186	4.81	146	1.648	122	3.155	9.8	141	6.95	2	0	1	59	1	0	3	1	1	1	1	0	11.7	2	1	0
50140	21	18	9	3.21	129	7.16	4.6	273.6	0.52	45.97	2	75	1	2	2.27	10060.8	96.83	83.7	144.7	39.97	108	6.4	57	1.47	200	5.17	174	1.964	108	2.793	14.7	120	12.25	2	1	1	62	1	1	3	1	1	1	1	0	27.5	3	1	1
50949	21	24	14	5	115	6.38	5.5	327.1	1.12	99.01	1	71	1	1	0.58	10263.8	70.23	68.7	163.1	25.83	96.3	5.5	57	1.47	193	4.99	59	0.666	124	3.207	8.4	92	9.13	2	0	1	70	1	0	2	0	1	1	2	0	30	3	0	1
15351	20	17	21	7.5	315	17.486	3.7	220.1	1	88.4	1	80	1	1	2.26	1004.02	76.08	81.1	177.8	25.65	99.2	12.9	37	0.96	221	5.72	150	1.69	154	3.98	18.8	94	20	1	0	1	59	0	1	2	1	1	1	2	0	30	3	0	0
15660	20	23	12	4.28	125	6.939	5.6	333.1	1.1	97.24	1	68	1	1	1.66	1602.16	73.12	82.1	171.1	28.04	94.7	6.6	31	0.8	176	4.55	201	2.27	105	2.72	137	122	112.3	1	0	1	78	0	1	2	1	2	2	2	1	29.4	3	0	0
19309	20	23	6	2.14	74	4.108	4.8	285.5	0.7	61.88	1	52	3	5	5	34926.9	110.87	66	179.3	20.53	81.7	5.1	71	1.84	242	6.26	67	0.76	158	4.09	3.5	56	6.25	2	0	1	82	0	0	1	0	1	1	1	0	29.4	3	0	1
27848	20	16	21	7.5	162	8.99	6	356.9	1.4	123.76	1	71	3	3	5	38570.9	53.73	78.5	179.1	24.47	93.3	7.5	38	0.98	183	4.73	133	1.502	118	3.051	112.7	122	92.38	1	1	1	78	0	1	1	0	2	3	3	1	30	3	0	0
50625	20	24	18	6.43	94	5.22	4.5	267.7	0.62	54.81	2	60	2	4	5	8975.58	101.89	68.5	156.7	27.9	84.1	5.9	59	1.53	133	3.44	124	1.4	49	1.267	11.5	202	5.69	1	0	1	77	1	1	2	0	1	1	1	0	10	2	0	1
5222	20	23	13	4.6	125	6.939	5.9	350.9	0.8	70.7	2	71	4	3	2.49	8325.56	78.72	85.7	157.7	34.46	99.8	5.5	68	1.76	254	6.57	96	1.08	167	4.32	136.2	171	79.65	1	0	1	78	0	1	3	0	2	2	2	1	18.51	2	1	1
60516	20	29	10	3.57	94	5.22	8.4	499.6	1.07	94.59	1	66	3	1	0.68	21456.3	76.53	74.3	171.5	25.26	106.5	5.3	66	1.71	192	4.97	98	1.106	106	2.741	14.9	65	22.92	2	0	1	60	0	0	2	0	1	1	2	0	30	3	1	1
11162	19	16	10	3.57	105	5.829	5.7	339	0.9	79.56	2	42	4	4	1.89	13884.8	81.86	100.9	171.7	34.23	109	5.9	37	0.96	194	5.02	179	2.02	121	3.13	8.3	89	9.33	2	0	1	90	1	0	3	1	1	1	2	0	4.5	1	1	0
60331	19	26	20	7.14	100	5.55	5.1	303.3	1.46	129.06	1	76	3	5	5	36225.9	49.53	73.3	177.5	23.27	94.1	5.7	82	2.12	142	3.67	64	0.723	47	1.215	6.1	184	3.32	2	1	1	68	1	0	1	0	1	2	3	1	29.4	3	0	1
62071	19	20	8	2.86	105	5.83	4.6	273.6	0.9	79.56	1	49	4	2	0.78	28574.2	104.7	66.2	172.9	22.14	82	5.5	61	1.58	275	7.11	86	0.971	197	5.094	4.4	145	3.03	2	0	1	66	1	0	1	0	1	1	1	0	21.6	3	0	1
757	19	17	6	2.1	94	5.218	5.3	315.2	0.8	70.7	1	29	3	3	1.02	38510.9	122.86	76.6	173.1	25.56	91.3	4.8	53	1.36	214	5.53	110	1.24	139	3.59	19.9	237	8.4	2	0	1	84	1	0	2	0	1	1	1	0	5.6	1	0	1
12838	18	22	15	5.36	98	5.44	5.6	333.1	0.8	70.72	2	64	4	4	4.31	6706.48	82.23	67.9	165.7	24.73	83.9	6	49	1.27	233	6.03	81	0.91	168	4.34	4.9	63	7.78	2	0	1	73	1	0	1	0	1	1	2	0	15.9	2	0	0
24168	18	23	14	5	99	5.5	5.4	321.2	0.8	70.72	2	66	4	1	1.07	15507.9	81.21	67.8	157.8	27.23	97.2	5.9	59	1.53	263	6.8	151	1.705	174	4.5	10.1	85	11.88	1	0	1	80	1	0	2	1	1	1	2	0	11.7	2	1	1
27961	18	30	18	6.43	99	5.5	4.8	285.5	1.2	106.08	2	81	3	2	1.49	19499.5	45.48	68.3	159.5	26.85	93.8	5.6	50	1.29	174	4.5	122	1.377	100	2.586	17	222	7.66	2	0	1	72	0	0	2	0	1	2	3	1	21.5	3	1	1
37887	18	20	15	5.36	149	8.27	7.1	422.3	1.1	97.24	2	67	3	3	2.12	81813.3	55.07	104.4	159	41.3	123.2	6.5	69	1.78	258	6.67	106	1.197	168	4.344	11.6	140	8.29	2	1	1	78	0	1	3	0	1	2	3	1	24.8	3	1	1
45298	18	22	12	4.28	93	5.16	6.3	374.7	0.72	63.65	2	67	3	2	1.97	52544.9	91.58	74	151.5	32.24	101.4	5.6	62	1.6	216	5.59	110	1.242	132	3.414	1.9	46	4.13	2	0	1	75	1	0	3	0	1	1	1	0	15.9	2	1	1
5488	18	15	14	5	100	5.551	4.1	243.9	0.3	26.5	2	44	1	3	2.88	6355.27	134.06	105.4	145.3	49.92	132.6	5.1	43	1.1	187	4.84	96	1.08	125	3.23	12.6	188	6.7	2	0	1	89	0	0	3	0	1	1	1	0	4.5	1	1	0
55552	18	18	15	5.36	103	5.72	6.7	398.5	0.92	81.33	1	80	3	4	5	21378.3	84.09	94	177.6	29.8	111.6	5.8	44	1.14	214	5.53	92	1.039	152	3.931	9.4	112	8.39	1	0	1	62	1	0	2	0	1	1	2	0	30	3	1	1
56591	18	24	13	4.64	101	5.61	3.1	184.4	0.64	56.58	2	80	3	4	3.69	29691.1	89.28	51.4	155	21.39	75.5	5.8	81	2.09	197	5.09	81	0.914	100	2.586	17.3	61	28.36	1	0	1	65	1	0	1	0	1	1	2	0	10	2	0	1
64591	18	19	19	6.78	100	5.55	7.5	446.1	0.9	79.56	1	51	4	2	1.22	20075.5	103.4	76.9	170.7	26.4	92.4	4.8	48	1.24	245	6.34	59	0.666	185	4.784	13	159	8.18	1	0	1	68	1	0	2	0	1	1	1	0	30	3	0	1
15516	17	16	19	6.78	111	6.162	7	416.4	1.3	114.92	1	71	3	1	4.02	15981	58.73	92.8	183.3	27.62	113.4	5.5	44	1.14	199	5.15	142	1.6	127	3.28	8.9	186	4.78	2	0	1	77	1	0	2	1	1	2	3	1	30	3	1	1
4896	17	21	13	4.6	96	5.329	4.6	273.6	0.7	61.9	2	85	3	4	5	11317.3	84.7	45.7	155.7	18.85	70.1	5.4	57	1.48	258	6.67	120	1.35	177	4.58	117.2	162	72.35	2	1	1	59	0	0	1	0	2	2	2	1	15.9	2	0	1
52122	17	22	13	4.64	90	5	6	356.9	0.83	73.37	1	67	3	4	5	60764.1	95.93	104	179.3	32.35	117.5	5.4	76	1.97	185	4.78	64	0.723	96	2.483	7.2	62	11.61	2	0	1	75	0	0	3	0	1	1	1	0	30	3	1	1
53785	17	21	14	5	93	5.16	6.9	410.4	0.75	66.3	2	56	3	5	1.37	25642.4	93.38	113.7	170.4	39.16	126	5.4	58	1.5	194	5.02	94	1.061	117	3.026	7.2	136	5.29	1	0	1	80	0	0	3	0	1	1	1	0	10	2	1	1
60369	17	17	6	2.14	75	4.16	4.3	255.8	0.85	75.14	2	38	4	5	5	26115.4	89.88	77.9	163	29.32	92	5.1	60	1.55	192	4.97	97	1.095	113	2.922	1.1	62	1.77	2	0	1	93	0	0	2	0	1	1	2	0	3.9	1	1	1
65098	17	21	13	4.64	117	6.49	6.2	368.8	0.68	60.11	2	68	4	2	1.39	11355.3	94.81	77.2	157.6	31.1	96.7	6.5	68	1.76	173	4.47	31	0.35	99	2.56	2.2	95	2.32	2	0	1	70	1	1	3	0	1	1	1	0	11.7	2	1	1
197	16	18	14	5	98	5.44	3.8	226	0.9	79.6	1	74	2	1	1.44	14203	89.62	83.6	174.7	27.39	109.7	5.1	37	0.96	209	5.4	153	1.73	141	3.65	5	49	10.2	1	1	1	91	1	0	2	1	1	1	2	0	30	3	1	0
4389	16	19	24	8.6	109	6.051	6	356.9	1	88.4	1	85	3	5	3.16	7128.12	73.76	68	160.8	26.3	106	5.3	38	0.99	210	5.43	229	2.59	126	3.26	3.9	100	3.9	2	0	1	63	1	0	2	1	1	1	2	0	30	3	1	0
439	16	19	11	3.9	88	4.885	6.4	380.7	0.9	79.6	1	30	4	4	0.78	13366.3	117.83	94.9	176.3	30.53	97.5	5.3	56	1.45	162	4.19	78	0.88	90	2.33	16.7	203	8.23	2	0	1	101	0	0	3	0	1	1	1	0	4.7	1	0	1
44688	16	26	23	8.21	76	4.22	7.7	458	1.12	99.01	1	80	2	3	0.59	8946.3	66.41	51.1	166.6	18.41	73	5.7	43	1.11	150	3.88	85	0.96	90	2.327	9.9	128	7.73	2	0	1	66	1	0	1	0	1	1	2	0	30	3	0	1
50509	16	16	12	4.28	88	4.88	6.5	386.6	0.91	80.44	2	62	4	4	4.72	8135.22	71.33	105.1	167.6	37.42	127.5	5.7	50	1.29	260	6.72	94	1.061	191	4.939	10.6	101	10.5	1	0	1	81	1	0	3	0	1	1	2	0	18.51	2	1	1
59152	16	21	13	4.64	86	4.77	4.6	273.6	0.82	72.49	1	57	2	4	2.77	14464.5	102.46	73.8	162	28.12	96.1	5.3	48	1.24	203	5.25	102	1.152	135	3.491	6.9	89	7.75	2	0	1	77	0	0	2	0	1	1	1	0	18.4	2	0	1
63343	16	18	7	2.5	93	5.16	4.3	255.8	0.61	53.92	2	45	3	5	4.86	129042	112.29	119.4	166.7	43	139.5	5.1	39	1.01	153	3.96	139	1.569	86	2.224	9.3	159	5.85	2	0	1	66	0	0	3	1	1	1	1	0	4.5	1	1	0
65374	16	18	16	5.71	177	9.83	5.2	309.3	0.89	78.68	2	80	3	2	1.02	32415.8	65.5	75.7	158.5	30.1	112.3	7	51	1.32	194	5.02	268	3.026	89	2.302	25	78	32.05	2	0	1	66	0	1	3	1	2	2	2	1	27.5	3	1	1
690	16	19	11	3.9	83	4.607	5.1	303.3	0.6	53	2	68	1	4	3.16	1837.09	97.71	70.5	166.3	25.49	97.9	5.3	60	1.56	227	5.87	302	3.41	106	2.74	9.2	44	20.91	2	0	1	87	0	0	2	1	1	1	1	0	10	2	1	1
3045	15	16	19	6.8	118	6.55	5.3	315.2	0.7	61.9	2	73	4	1	0.75	7111.25	91.26	96.3	157.6	38.77	120.2	5.4	75	1.93	265	6.85	70	0.79	115	2.97	1.6	31	5.16	2	0	1	78	1	0	3	0	1	1	1	0	27.5	3	1	1
43168	15	20	8	2.86	103	5.72	6.7	398.5	0.82	72.49	1	78	1	1	1.28	10263.8	89.91	90.2	171.2	30.78	111.5	6.6	62	1.6	171	4.42	176	1.987	74	1.914	202.5	138	146.74	2	0	1	67	1	1	3	1	2	2	2	1	30	3	1	1
45421	15	21	10	3.57	92	5.11	3.5	208.2	0.62	54.81	2	69	1	3	0.88	8251.21	96.34	68.4	161.6	26.19	97.2	5.7	65	1.68	223	5.77	104	1.174	137	3.543	2.9	57	5.09	2	0	1	79	1	0	2	0	1	1	1	0	7.3	1	1	1
46275	15	15	12	4.28	82	4.55	6.4	380.7	1.28	113.15	2	73	4	3	1.06	15412.6	44.23	76.3	161.2	29.36	95.2	7.1	43	1.11	149	3.85	94	1.061	87	2.25	51.8	127	40.79	1	1	1	56	0	1	2	0	2	4	4	1	18.51	2	1	0
53682	15	21	18	6.43	94	5.22	5.1	303.3	0.87	76.91	2	67	4	5	5	22068.7	72.98	94.6	159.4	37.23	103.2	5	71	1.84	244	6.31	114	1.287	150	3.879	8.4	231	3.64	2	0	1	75	1	0	3	0	1	1	2	0	10	2	1	1
15774	14	17	13	4.64	101	5.607	4.4	261.7	0.8	70.72	1	41	1	1	0.84	6363.43	114.02	79.8	169	27.94	97.4	5.4	48	1.24	237	6.13	150	1.69	159	4.11	12.2	248	4.92	1	0	1	77	1	0	2	1	1	1	1	0	15.6	2	0	1
26994	14	17	8	2.86	90	5	5.4	321.2	0.8	70.72	2	30	4	3	0.46	32630.7	101.59	122	169.5	42.46	127.4	5.3	31	0.8	114	2.95	52	0.587	73	1.888	43.7	321	13.61	2	0	1	93	0	0	3	0	1	1	1	0	6.3	1	1	0
60226	14	26	3	1.07	113	6.27	4.5	267.7	0.72	63.65	1	59	3	3	0.23	24052.9	105.24	54	172.2	18.21	79.2	5.8	59	1.53	141	3.65	78	0.881	66	1.707	17.1	84	20.36	2	0	1	33	1	0	1	0	1	1	1	0	21.6	3	0	1
61667	14	19	17	6.07	91	5.05	6.1	362.8	0.47	41.55	2	71	2	1	1.55	7402.44	101.72	91.4	152.8	39.15	122.4	5.59	64	1.66	235	6.08	221	2.495	127	3.284	7.6	100	7.6	1	0	1	76	0	0	3	1	1	1	1	0	15.9	2	1	1
64679	14	17	8	2.86	80	4.44	4.5	267.7	0.65	57.46	2	38	5	2	1.57	17978.1	115.5	58.1	152.3	25	77	5	59	1.53	185	4.78	62	0.7	114	2.948	11.1	97	11.44	2	0	1	67	0	0	2	0	1	1	1	0	2.4	1	0	1
1382	13	13	24	8.6	286	15.876	4.8	285.5	1.1	97.2	1	84	3	2	2.89	8598.55	66.19	80	177.4	25.42	96.4	9.5	61	1.57	229	5.92	222	2.51	115	2.97	167.5	168	99.7	2	0	1	65	0	1	2	1	2	2	2	1	30	3	0	1
49247	13	16	27	9.64	105	5.83	6.2	368.8	1.07	94.59	2	74	3	5	5	40924.8	54.51	85.9	163.2	32.25	112	5.8	75	1.94	232	6	99	1.118	137	3.543	7.8	47	16.6	2	0	1	29	1	0	3	0	1	2	3	1	15.9	2	1	1
60607	13	26	17	6.07	128	7.11	4.2	249.8	0.68	60.11	2	70	1	1	1.28	9813.89	93.63	69.6	153.3	29.62	92.7	6.5	50	1.29	128	3.31	86	0.971	61	1.577	8.5	116	7.33	1	1	1	61	0	1	2	0	1	1	1	0	15.9	2	1	1
52674	12	20	18	6.43	88	4.88	5.9	350.9	0.86	76.02	2	80	3	3	1.63	27725.1	68.25	61	156.4	24.94	83.8	5.5	76	1.97	259	6.7	86	0.971	166	4.293	20.5	154	13.31	2	0	1	71	0	0	1	0	1	1	2	0	21.5	3	0	1
17734	11	14	11	3.93	100	5.551	4.8	285.5	1.1	97.24	2	64	3	2	2.21	27464.9	56.11	106.6	170.3	36.76	113.8	5.9	73	1.89	234	6.05	259	2.92	109	2.82	3.5	128	2.73	2	0	1	66	1	0	3	1	1	2	3	1	11.7	2	1	1
32918	11	11	14	5	134	7.44	5.2	309.3	0.6	53.04	2	64	4	2	2.13	15156.7	100.17	93.8	164.6	34.62	112.5	7.5	59	1.53	172	4.45	110	1.242	91	2.353	6.9	44	15.68	1	1	1	57	0	1	3	0	1	1	1	0	18.51	2	1	1
45520	11	21	22	7.85	92	5.11	6.6	392.6	0.92	81.33	2	78	3	2	2.33	36127.1	63.73	75.6	159.7	29.64	114.7	6	56	1.45	199	5.15	193	2.179	104	2.689	16.3	76	21.45	2	0	1	63	1	0	2	1	1	1	2	0	11.7	2	1	1
5903	11	11	12	4.3	95	5.273	5.6	333.1	0.4	35.4	2	48	3	4	0.42	32273.5	122.01	116.3	160.6	45.09	127.8	5.8	41	1.05	217	5.61	143	1.61	148	3.83	43.1	95	45.37	2	0	1	75	1	0	3	1	2	2	1	0	15.9	2	1	0
58834	9	17	11	3.93	86	4.77	4.5	267.7	0.94	83.1	2	80	3	3	5	34155.1	61.34	57.7	168.3	20.37	86	5.5	52	1.34	143	3.7	56	0.632	80	2.069	7.5	122	6.15	1	0	1	48	0	0	1	0	1	1	2	0	15.9	2	0	1
49887	81	63	9	3.21	136	7.55	7.7	458	0.77	68.07	1	52	2	3	5	14309.2	107.72	117.1	171	40.05	125.9	6.6	45	1.16	234	6.05	132	1.49	163	4.215	6.3	91	6.92	2	0	1	83	0	1	3	0	1	1	1	0	15.6	2	1	1
51321	56	45	23	8.21	98	5.44	4.9	291.5	1.02	90.17	1	38	1	2	1.46	38735.2	96.48	94.4	172.9	31.58	112.6	5	48	1.24	213	5.51	226	2.552	120	3.103	31.9	114	27.98	2	0	1	74	1	0	3	1	1	1	1	0	4.7	1	1	1
11733	47	40	11	3.93	91	5.051	5.6	333.1	1.2	106.08	1	70	3	5	5	16950.2	65.06	64.3	176.1	20.73	89.2	5.3	45	1.16	238	6.15	139	1.57	165	4.27	2.2	50	4.4	1	0	1	89	0	0	1	1	1	1	2	0	30	3	0	1
40965	41	23	12	4.28	97	5.38	4.4	261.7	0.9	79.56	1	50	1	4	5	18144	104.05	79.8	169.6	27.74	97.9	5.8	45	1.16	215	5.56	174	1.964	135	3.491	3.4	114	2.98	2	0	1	89	1	0	2	1	1	1	1	0	29.4	3	0	1
3258	40	34	14	5	106	5.884	7.2	428.3	0.4	35.4	2	72	1	1	0.41	1083.49	105.09	87.6	151.3	38.27	115.7	5.9	39	1	224	5.79	197	2.22	146	3.78	12.5	95	13.16	2	0	1	63	1	0	3	1	1	1	1	0	15.9	2	1	0
40104	40	47	32	11.42	87	4.83	5.4	321.2	1.3	114.92	1	81	3	5	4.09	21792.4	55.19	57.9	179.9	17.89	77.9	5.5	106	2.74	163	4.22	63	0.711	44	1.138	9.2	125	7.36	2	0	1	47	0	0	1	0	1	2	3	1	30	3	0	1
14513	38	33	15	5.36	92	5.107	6.3	374.7	0.9	79.56	1	60	3	5	3.1	23366.3	97.78	80.2	185.4	23.33	98.4	5	44	1.14	263	6.8	293	3.31	160	4.14	2.9	73	3.97	2	0	1	88	0	0	1	1	1	1	1	0	30	3	0	1
56944	38	28	13	4.64	92	5.11	6	356.9	0.85	75.14	1	28	3	2	0.53	33935.8	121.38	91.7	185.3	26.71	93.6	5.3	62	1.6	197	5.09	62	0.7	123	3.181	2.9	106	2.74	2	0	1	57	0	0	2	0	1	1	1	0	4.7	1	0	1
22691	34	37	11	3.93	104	5.77	8.7	517.5	1.1	97.24	1	36	4	3	3.01	27628.8	89.22	98.9	173.9	32.7	113.3	5.8	41	1.06	244	6.31	806	9.1	115	2.97	1067	241	442.74	2	0	1	113	1	0	3	1	3	3	2	1	6.7	1	1	1
26347	34	27	13	4.64	105	5.83	8	475.8	0.8	70.72	1	39	3	3	0.11	43895.4	115.45	86.2	175.1	28.11	101.7	5.8	43	1.11	279	7.21	271	3.06	182	4.707	3.1	65	4.77	2	0	1	65	1	0	2	1	1	1	1	0	21.6	3	0	1
48005	31	32	41	14.64	111	6.16	5.9	350.9	1.96	173.26	2	73	3	3	1.79	51116.5	26.53	72.8	152.9	31.14	107.5	6.3	33	0.85	264	6.83	309	3.489	169	4.37	44.3	134	33.06	1	1	1	71	1	1	3	1	2	4	5	1	30	3	1	0
9932	31	24	10	3.6	211	11.713	3.6	214.1	0.5	44.2	2	52	1	1	4.95	4753.33	112.78	56.5	161.3	21.72	83.3	8.8	120	3.12	293	7.58	84	0.95	156	4.03	55.5	94	59.04	2	0	1	77	0	1	1	0	2	2	1	0	11.7	2	0	1
63576	30	34	10	3.57	101	5.61	5.2	309.3	0.98	86.63	1	46	2	5	5	39244.1	96.31	82.3	172.3	27.7	99	5.3	34	0.88	232	6	347	3.918	129	3.336	3.8	155	2.45	2	0	1	87	1	0	2	1	1	1	1	0	30	3	0	0
11004	28	20	16	5.71	122	6.772	3.9	232	1.3	114.92	1	66	3	4	2.97	21055.3	60.59	98.3	177.2	31.31	116	5.5	53	1.37	180	4.65	114	1.29	104	2.69	1	28	3.57	2	0	1	0	0	1	3	0	1	1	2	0	30	3	1	1
18758	28	27	22	7.85	92	5.107	4.5	267.7	0.7	61.88	2	57	3	5	4.4	35846.8	100.81	78.1	160.1	30.47	105	5.6	67	1.73	200	5.17	84	0.95	115	2.97	51.8	203	25.52	2	0	1	70	0	0	3	0	1	1	1	0	7.3	1	1	1
27227	28	25	17	6.07	94	5.22	4.7	279.6	0.9	79.56	1	65	3	3	4	58126.2	94.78	91.9	178	29.01	105.8	5.1	33	0.85	164	4.24	110	1.242	109	2.819	10	206	4.85	2	0	1	81	0	0	2	0	1	1	1	0	30	3	1	0
32414	27	26	12	4.28	178	9.88	4.5	267.7	0.9	79.56	2	78	3	3	1.97	62389.5	65.44	64.9	168.5	22.86	92.5	7.8	51	1.32	163	4.22	112	1.264	90	2.327	9.4	89	10.56	1	1	1	49	0	1	1	0	1	1	2	0	18.51	2	1	1
3298	25	27	9	3.2	73	4.052	5.8	345	0.7	61.9	1	46	1	1	1.88	7088.65	115.08	62	170.1	21.43	80.1	5.3	68	1.75	182	4.71	126	1.42	89	2.3	2.6	121	2.15	2	0	1	73	0	0	1	0	1	1	1	0	13.3	2	0	1
43682	25	25	13	4.64	132	7.33	6.1	362.8	0.77	68.07	2	80	3	3	2.02	24668.9	77.93	70.2	153.4	29.83	100.7	6.7	33	0.85	172	4.45	372	4.2	65	1.681	7.9	95	8.32	2	0	1	57	0	1	2	1	1	1	2	0	30	3	1	0
43683	25	22	13	4.64	98	5.44	7	416.4	1.02	90.17	1	54	3	4	5	82326.8	87.34	77.3	173.9	25.56	93.9	5.7	54	1.4	245	6.34	125	1.411	166	4.293	2	66	3.03	2	0	1	91	1	0	2	0	1	1	2	0	13.3	2	0	1
63890	25	21	10	3.57	91	5.05	3.7	220.1	0.74	65.42	2	60	2	1	0.68	9716.81	92.57	94.3	156.2	38.7	108.3	5.6	49	1.27	143	3.7	45	0.508	85	2.198	63.8	106	60.19	2	1	1	87	0	0	3	0	2	2	1	0	18.51	2	1	0
49272	24	31	18	6.43	83	4.61	3.8	226	0.52	45.97	2	60	3	5	2.56	70866.5	106.3	59.6	159.9	23.31	82.9	5.3	95	2.46	232	6	57	0.644	126	3.258	5.9	78	7.56	1	0	1	74	0	0	1	0	1	1	1	0	11.7	2	0	1
5393	23	32	13	4.6	83	4.607	5.6	333.1	0.7	61.9	1	49	4	4	3.21	12292.8	112.95	77.4	173.9	25.59	82.2	4.9	50	1.29	218	5.64	68	0.77	155	4.01	16	219	7.31	2	0	1	77	0	0	2	0	1	1	1	0	21.6	3	0	1
55147	23	19	9	3.21	90	5	5.9	350.9	0.71	62.76	2	42	3	3	0.67	88745.8	108.8	69.2	162.1	26.34	101.1	5.9	38	0.98	180	4.65	444	5.013	115	2.97	2.6	129	2.02	2	0	1	88	1	0	2	1	1	1	1	0	7.3	1	1	0
55202	23	24	21	7.5	128	7.11	8.5	505.6	0.71	62.76	2	69	3	4	2.09	62085.9	91.98	95.4	172.2	32.17	117.2	6.6	47	1.22	189	4.89	114	1.287	119	3.077	5.7	44	12.95	2	0	1	75	0	1	3	0	1	1	1	0	15.9	2	1	0
16661	22	21	22	7.85	108	5.995	7	416.4	2.2	194.48	1	50	4	2	1.26	15434.8	35.6	101	179.2	31.45	103.5	8.2	35	0.91	222	5.74	175	1.98	152	3.93	1242	215	577.67	1	1	1	99	1	1	3	1	3	4	4	1	30	3	1	0
30418	22	23	10	3.57	96	5.33	5.9	350.9	1.1	97.24	1	60	1	3	2.31	3300.11	76.85	82.5	160.4	32.07	107.2	5.2	46	1.19	195	5.04	70	0.79	135	3.491	2.6	65	4	1	0	1	81	0	0	3	0	1	1	2	0	29.4	3	1	1
48704	22	25	9	3.21	91	5.05	3.7	220.1	0.84	74.26	2	71	1	4	3.52	8873.66	74.25	65.7	154.1	27.67	93.8	5.1	61	1.58	195	5.04	130	1.468	108	2.793	5.5	91	6.04	2	0	1	71	0	0	2	0	1	1	2	0	10	2	1	1
52348	22	30	8	2.86	101	5.61	5.9	350.9	1.37	121.11	1	57	4	4	4.26	23882	60.17	121.4	185.1	35.43	118.1	5.2	43	1.11	130	3.36	115	1.298	64	1.655	30.7	215	14.28	1	0	1	98	1	0	3	0	1	1	2	0	29.4	3	1	1
53207	22	38	14	5	155	8.6	6.9	410.4	1.06	93.7	2	80	5	4	2.17	35148.3	53.11	52.7	144.9	25.1	89.3	6	43	1.11	131	3.39	150	1.694	58	1.5	10.6	29	36.55	2	0	1	80	1	1	2	1	2	3	3	1	13.7	2	1	0
53492	22	23	13	4.64	109	6.05	8.1	481.8	0.86	76.02	2	44	3	3	4.08	88745.8	85.38	107	153.1	45.65	121	6	51	1.32	233	6.03	189	2.134	144	3.724	11.6	222	5.23	1	0	1	72	1	0	3	1	1	1	2	0	6.3	1	1	1
10679	21	21	11	3.93	84	4.663	3.8	226	0.8	70.72	1	50	1	1	3.66	5202.76	107.82	70.2	165	25.79	89.2	5.3	45	1.16	296	7.65	177	2	216	5.59	24.4	178	13.71	1	0	1	89	0	0	2	1	1	1	1	0	30	3	0	1
16509	21	21	12	4.28	101	5.607	4.1	243.9	0.9	79.56	1	68	1	2	2.12	1612.47	93.03	70.3	164.1	26.11	91.8	5.6	51	1.32	256	6.62	112	1.26	183	4.73	1.3	31	4.19	1	0	1	77	1	0	2	0	1	1	1	0	25.3	3	0	1
57541	21	27	10	3.57	109	6.05	5.4	321.2	0.76	67.18	1	50	1	1	0.36	10383.4	109.5	66.6	165.4	24.34	93.7	5.8	42	1.09	207	5.35	362	4.087	93	2.405	14.8	148	10	2	0	1	78	1	0	1	1	1	1	1	0	29.4	3	0	1
60014	21	25	19	6.78	88	4.88	6.5	386.6	1.68	148.51	1	80	3	4	4.1	27427.1	40.83	75.5	174.5	24.79	99.9	5.2	48	1.24	177	4.58	81	0.914	113	2.922	39.2	92	42.61	2	1	1	103	0	0	1	0	2	4	4	1	30	3	0	1
24114	20	22	6	2.14	85	4.72	2.9	172.5	0.5	44.2	2	41	1	3	3.92	20095.8	120.77	67.6	150.3	29.92	92.4	5.2	55	1.42	200	5.17	114	1.287	122	3.155	15.9	162	9.81	2	0	1	77	0	0	2	0	1	1	1	0	3.3	1	1	1
41991	20	25	13	4.64	129	7.16	5	297.4	0.75	66.3	1	66	1	1	0.35	7384.25	99.53	73.8	164.6	27.24	99	7.5	38	0.98	204	5.28	189	2.134	128	3.31	10.4	39	26.67	2	0	1	75	0	1	2	1	1	1	1	0	30	3	0	0
43956	20	32	14	5	103	5.72	4.5	267.7	0.72	63.65	2	80	5	1	1.39	27491.6	84.47	42.2	152.8	18.07	73.9	5.4	65	1.68	222	5.74	133	1.502	130	3.362	12.2	112	10.89	2	0	1	56	1	0	1	0	1	1	2	0	18.51	2	0	1
52931	20	23	25	8.93	96	5.33	9	535.3	1.31	115.8	1	70	3	5	5	33722.5	58.56	104.4	174.6	34.25	115.5	5.5	44	1.14	171	4.42	67	0.756	114	2.948	1.9	56	3.39	2	0	1	67	0	0	3	0	1	2	3	1	30	3	1	1
21582	19	22	17	6.07	91	5.05	3.6	214.1	0.7	61.88	2	77	3	3	2.67	51419.4	89.02	59.4	166.9	21.32	81.4	5.7	31	0.8	178	4.6	295	3.331	88	2.276	8.7	112	7.77	2	0	1	69	1	0	1	1	1	1	2	0	27.5	3	0	0
5681	19	21	22	7.9	101	5.607	5.6	333.1	0.7	61.9	1	85	3	1	1.94	7264.75	90.3	89.44	171.7	30.34	113.8	5.2	43	1.11	168	4.34	112	1.26	103	2.66	10.2	146	6.99	1	0	1	65	1	0	3	0	1	1	1	0	30	3	1	1
57589	19	25	17	6.07	90	5	5.2	309.3	0.9	79.56	1	49	3	5	5	74453.6	104.7	72.1	184	21.3	84.3	5.8	53	1.37	230	5.95	90	1.016	159	4.112	4.6	103	4.47	2	0	1	77	1	0	1	0	1	1	1	0	9.4	1	0	1
12890	18	42	13	4.64	110	6.106	3.1	184.4	0.6	53.04	2	58	3	2	0.6	22065.1	103.98	68.2	163.1	25.64	96.4	5.1	72	1.86	215	5.56	133	1.5	116	3	3.2	20	16	1	0	1	17	1	0	2	0	1	1	1	0	15.9	2	1	1
29725	18	19	14	5	124	6.88	5.4	321.2	0.8	70.72	2	72	3	3	2.79	48394.4	78.24	83.2	161.9	31.74	105.7	6.2	58	1.5	272	7.03	259	2.924	162	4.189	11.2	49	22.86	2	0	1	71	1	0	3	1	1	1	2	0	21.5	3	1	1
44287	18	22	11	3.93	89	4.94	6.7	398.5	0.72	63.65	2	51	1	4	4.36	9900.81	101.17	93.4	166.3	33.77	97.2	4.7	38	0.98	328	8.48	693	7.824	115	2.97	39.4	66	59.7	2	0	1	73	1	0	3	1	2	2	1	0	18.51	2	1	0
44774	18	23	20	7.14	87	4.83	4.4	261.7	0.82	72.49	2	68	3	3	1.18	21576.6	77.86	66.1	158.1	26.44	88.5	5.9	79	2.04	218	5.64	71	0.802	125	3.233	5.7	65	8.77	2	0	1	63	1	0	2	0	1	1	2	0	7.3	1	1	1
45311	18	27	18	6.43	135	7.49	5.3	315.2	0.82	72.49	1	68	4	2	2.92	7237.07	95.68	103.1	170.8	35.34	120	6.5	45	1.16	171	4.42	90	1.016	108	2.793	175.8	102	172.35	1	0	1	91	0	1	3	0	2	2	1	0	30	3	1	1
48672	18	25	25	8.93	93	5.16	6.1	362.8	1.12	99.01	2	80	3	3	4.9	31087.8	49.71	64.3	153.2	27.4	89	5.7	57	1.47	151	3.9	80	0.903	78	2.017	4.6	98	4.69	1	0	1	59	1	0	2	0	1	2	3	1	15.9	2	1	1
51866	18	19	20	7.14	89	4.94	9.3	553.2	1.15	101.66	1	74	3	3	5	33006.3	66.78	88.1	177	28.12	108	6.1	52	1.34	226	5.84	161	1.818	142	3.672	14.2	71	20	2	0	1	81	1	0	2	1	1	1	2	0	30	3	1	1
56198	18	19	7	2.5	68	3.77	2.9	172.5	0.66	58.34	2	47	3	5	2.72	18444	108.81	58	165.1	21.28	78.8	5.4	69	1.78	215	5.56	60	0.677	134	3.465	0.3	8	3.75	1	0	1	81	0	0	1	0	1	1	1	0	6.3	1	0	1
12046	17	25	6	2.14	94	5.218	4.2	249.8	0.8	70.72	1	73	3	1	0.94	8019.09	93.45	79.3	174.5	26.04	98	4.8	82	2.12	189	4.89	53	0.6	96	2.48	120.5	59	204.24	2	0	1	40	1	0	2	0	2	2	1	0	30	3	0	1
41415	17	23	34	12.14	104	5.77	9.7	577	2.3	203.32	1	85	3	4	3.03	22077.2	27.15	81.1	178.5	25.45	106.2	5.6	58	1.5	207	5.35	168	1.897	115	2.974	8.7	130	6.69	2	1	1	73	1	0	2	1	1	4	5	1	30	3	1	1
60361	17	21	31	11.07	108	6	5.9	350.9	1.99	175.92	2	74	3	4	1.31	36390.4	25.89	73.7	165.1	27.04	94.8	5.2	44	1.14	279	7.21	210	2.371	193	4.991	1725	58	2974.14	2	0	1	79	1	0	2	1	3	4	5	1	30	3	1	0
61755	17	22	12	4.28	98	5.44	7.3	434.2	0.97	85.75	1	47	4	4	3.49	28574.2	96.9	87.9	172.4	29.57	99.1	5.7	64	1.66	212	5.48	69	0.779	134	3.465	7.3	350	2.09	2	0	1	63	1	0	2	0	1	1	1	0	7.9	1	0	1
1561	16	20	21	7.5	89	4.94	4.3	255.8	1	88.4	2	80	3	3	1.44	9442.61	56.95	53.4	154.6	22.34	79.8	5	75	1.95	215	5.56	107	1.21	118	3.05	7.2	137	5.26	1	0	1	67	0	0	1	0	1	2	3	1	18.51	2	0	1
24058	16	26	23	8.21	100	5.55	6.4	380.7	1.1	97.24	2	85	3	1	1.78	19334.1	49.24	61.7	162.2	23.45	88.2	5.4	85	2.2	219	5.66	97	1.095	115	2.974	12.9	105	12.29	1	0	1	40	1	0	1	0	1	2	3	1	11.7	2	1	1
26510	16	17	20	7.14	237	13.16	5.5	327.1	1.1	97.24	1	53	4	2	2.85	23640.3	80.27	155.9	182.7	46.71	154.6	11.4	68	1.76	185	4.78	84	0.948	100	2.586	472.5	135	350	2	0	1	87	0	1	3	0	3	3	2	1	21.6	3	1	1
42211	16	28	16	5.71	103	5.72	6.8	404.5	1.02	90.17	2	61	3	5	3.65	55604.4	62.59	67.2	162.1	25.57	90.1	5.5	55	1.42	245	6.34	273	3.082	135	3.491	1.6	52	3.08	2	0	1	77	1	0	2	1	1	1	2	0	15.9	2	1	1
11090	15	18	15	5.36	83	4.607	3.8	226	0.8	70.72	2	70	3	4	2.35	26717.8	79.22	65.8	167.1	23.57	84.4	5.1	59	1.53	199	5.15	124	1.4	115	2.97	2.8	62	4.52	2	0	1	75	0	0	1	0	1	1	2	0	10	2	0	1
44698	15	25	8	2.86	105	5.83	6.7	398.5	0.92	81.33	1	74	3	2	1.51	29384.5	87.29	77.8	178.8	24.34	99.4	5.3	38	0.98	171	4.42	150	1.694	103	2.664	13.9	95	14.63	1	0	1	52	1	0	1	1	1	1	2	0	30	3	0	0
45970	15	15	9	3.21	85	4.72	5.1	303.3	0.72	63.65	2	43	3	4	4.72	97373.9	106.33	89.6	169.3	31.26	110	5.3	67	1.73	130	3.36	53	0.598	52	1.345	3.5	87	4.02	2	0	1	91	0	0	3	0	1	1	1	0	2.4	1	1	1
6445	15	24	21	7.5	107	5.94	7.5	446.1	1.1	97.2	1	81	3	3	1.81	8225.17	67.44	86.2	173	28.8	106.2	5.7	41	1.07	250	6.47	299	3.38	149	3.85	65.3	170	38.41	2	1	1	57	1	0	2	1	2	2	2	1	30	3	1	1
26986	14	19	15	5.36	99	5.5	5.1	303.3	0.8	70.72	2	42	1	3	0.83	20095.8	94.28	79.7	160.1	31.09	103.1	5.2	46	1.19	222	5.74	167	1.885	143	3.698	6.5	51	12.75	2	0	1	75	0	0	3	1	1	1	1	0	5.3	1	1	0
43994	14	19	16	5.71	80	4.44	2.2	130.9	1.03	91.05	1	46	3	3	4.62	109838	90.73	82.9	183.3	24.67	96.7	5.7	40	1.03	180	4.65	271	3.06	86	2.224	2.4	69	3.48	1	0	1	79	1	0	1	1	1	1	1	0	21.6	3	0	1
58172	219	733	9	3.21	89	4.94	6.4	380.7	0.96	84.86	1	32	4	5	5	24325.2	107.7	93.7	187.1	26.77	91.4	5.4	38	0.98	168	4.34	77	0.869	115	2.974	18.6	175	10.63	2	0	1	76	0	0	2	0	1	1	1	0	2.8	1	0	0
62146	218	265	14	5	109	6.05	7	416.4	1.08	95.47	1	43	3	4	1.12	18897.3	87.32	91.2	177.9	28.82	105.4	5.6	24	0.62	528	13.65	2742	30.957	115	2.97	32.4	147	22.04	2	0	1	95	0	0	2	1	1	1	2	0	25.3	3	1	0
8816	123	63	10	3.6	109	6.051	8.2	487.7	0.8	70.7	1	27	3	5	3.59	34606.6	124.4	153.9	200.1	38.44	139.5	5.6	43	1.11	217	5.61	150	1.69	144	3.72	25.2	199	12.66	1	0	1	81	1	0	3	1	1	1	1	0	3.3	1	1	1
62522	113	95	8	2.86	118	6.55	6.5	386.6	0.88	77.79	1	54	3	4	5	24930.3	102.18	91.1	171	31.2	105.4	5.6	93	2.4	266	6.88	95	1.073	154	3.982	7.5	148	5.07	2	0	1	70	1	0	3	0	1	1	1	0	18.4	2	1	1
38901	90	59	16	5.71	105	5.83	8.5	505.6	1.2	106.08	1	53	3	4	5	80151.8	72.31	92.4	182.5	27.74	106.2	5.3	37	0.96	202	5.22	205	2.314	124	3.207	10	295	3.39	2	0	1	88	1	0	2	1	1	1	2	0	30	3	1	0
11279	82	44	9	3.21	99	5.495	5.8	345	0.7	61.88	1	31	1	1	1.33	9022.43	126.33	83.3	167.4	29.73	102	5.5	31	0.8	200	5.17	125	1.41	144	3.72	8	114	7.02	2	0	1	82	1	0	2	0	1	1	1	0	6.7	1	1	0
60513	68	57	10	3.57	81	4.5	5.7	339	0.81	71.6	1	62	3	5	2.06	62342.3	99.69	78.7	178.4	24.73	99.3	5.4	88	2.28	230	5.95	104	1.174	121	3.129	101	167	60.48	2	1	1	71	0	0	1	0	2	2	1	0	30	3	0	1
55333	62	171	6	2.14	52	2.89	7.5	446.1	0.73	64.53	2	31	4	3	0.05	22588.6	112.69	52.5	159.2	20.71	75.2	4.9	74	1.91	213	5.51	145	1.637	110	2.845	164.6	246	66.91	2	0	1	76	0	0	1	1	2	2	1	0	2.4	1	0	1
22049	61	68	11	3.93	176	9.77	5.7	339	1	88.4	1	65	3	5	1.92	50864.4	83.52	109.9	175.6	35.64	124.1	7.3	51	1.32	198	5.12	117	1.321	124	3.207	4.1	126	3.25	1	1	1	79	0	1	3	0	1	1	2	0	15.6	2	1	1
49076	59	27	11	3.93	111	6.16	4.8	285.5	0.81	71.6	1	54	1	1	1.42	17560.2	104.77	72.2	172.5	24.26	92.3	6.5	43	1.11	235	6.08	200	2.258	152	3.931	8.1	143	5.66	2	0	1	71	1	1	1	1	1	1	1	0	25.3	3	0	1
41733	53	33	14	5	109	6.05	6.6	392.6	0.92	81.33	1	38	3	3	5	73224	109.19	100.6	172	34	107.4	5.3	26	0.67	162	4.19	208	2.348	94	2.431	4.3	116	3.71	2	0	1	86	1	0	3	1	1	1	1	0	6.7	1	1	0
9536	52	26	9	3.2	100	5.551	5.3	315.2	0.9	79.6	1	43	1	4	2.76	5206.53	108.68	71	171.4	24.17	87.2	5.4	37	0.96	316	8.17	270	3.05	225	5.82	1.2	42	2.86	2	0	1	97	1	0	1	1	1	1	1	0	21.6	3	0	0
1226	49	35	12	4.3	221	12.268	4.3	255.8	0.7	61.9	1	60	3	5	4.1	24240.8	105.48	83.64	176.2	26.94	93.6	7.7	44	1.14	178	4.6	138	1.56	115	2.97	3.2	88	3.64	2	0	1	75	0	1	2	1	1	1	1	0	30	3	0	1
24067	48	52	16	5.71	246	13.66	6	356.9	0.9	79.56	1	54	3	2	0.51	28375.9	101.49	112.6	175.8	36.43	120.2	9.5	26	0.67	291	7.53	731	8.253	115	2.97	4330	257	1684.82	1	1	1	85	0	1	3	1	3	3	1	0	30	3	1	0
56734	47	54	10	3.57	95	5.27	6.1	362.8	0.71	62.76	2	73	2	1	1.3	7659.14	89.72	65.9	146.3	30.79	99.9	5.4	39	1.01	151	3.9	125	1.411	87	2.25	23.4	68	34.41	1	0	1	70	0	0	3	0	2	2	2	1	10	2	1	0
1161	45	38	16	5.7	123	6.828	5.5	327.1	0.9	79.6	1	57	3	3	3.52	29021.3	99.62	86.4	170.4	29.76	101.2	5.3	37	0.96	181	4.68	191	2.16	106	2.74	35.3	188	18.78	1	0	1	71	0	1	2	1	1	1	1	0	29.4	3	0	0
5009	45	31	22	7.9	126	6.994	7	416.4	0.8	70.7	1	57	3	5	5	22338.2	103.22	83.9	185.6	24.36	102.2	5.6	47	1.22	171	4.42	97	1.1	104	2.69	5.4	229	2.36	2	0	1	71	0	1	1	0	1	1	1	0	30	3	1	1
31894	44	48	9	3.21	128	7.11	3.4	202.2	0.6	53.04	2	61	1	4	1.15	6354.93	102.06	84.8	160.4	32.96	100.9	7	64	1.66	152	3.93	100	1.129	68	1.758	1.7	30	5.67	2	0	1	66	0	1	3	0	1	1	1	0	6.3	1	1	1
58296	43	30	24	8.57	123	6.83	6.6	392.6	0.99	87.52	2	69	3	2	1.92	21023.9	61.72	106.6	153.7	45.12	126.5	6.1	39	1.01	124	3.21	147	1.66	56	1.448	4.3	105	4.1	2	0	1	63	1	1	3	1	1	1	2	0	18.51	2	1	0
41027	41	34	6	2.14	87	4.83	5	297.4	0.8	70.72	2	43	4	5	3.98	27910.4	93.7	85	162.6	32.15	105.3	5.2	45	1.16	155	4.01	96	1.084	91	2.353	7.4	162	4.57	1	0	1	77	0	0	3	0	1	1	1	0	3.3	1	1	0
52795	41	26	20	7.14	108	6	5.7	339	0.84	74.26	1	61	5	4	0.76	14371.7	99.21	59.4	164.2	22.03	86.8	6.4	54	1.4	267	6.9	104	1.174	192	4.965	2.4	62	3.87	2	0	1	81	1	0	1	0	1	1	1	0	18.4	2	0	1
57848	41	31	13	4.64	95	5.27	7	416.4	0.74	65.42	1	65	2	1	0.82	6438.29	100.55	86.4	160.9	33.37	108.9	5.5	46	1.19	191	4.94	165	1.863	112	2.896	8.6	125	6.88	2	0	1	0	1	0	3	1	1	1	1	0	30	3	1	1
45775	40	22	9	3.21	94	5.22	6.2	368.8	0.64	56.58	1	42	5	2	1.09	12882.4	121.22	68.3	169	23.91	86.5	4.8	57	1.47	262	6.78	434	4.9	115	2.97	2	42	4.76	2	0	1	97	1	0	1	1	1	1	1	0	6.7	1	0	1
28584	38	28	16	5.71	102	5.66	7	416.4	1	88.4	1	44	3	4	5	98374.1	95.18	94.2	174.3	31.01	108.9	5.2	46	1.19	253	6.54	338	3.816	139	3.595	18.6	121	15.37	1	0	1	92	0	0	3	1	1	1	1	0	13.3	2	1	1
64504	37	46	10	3.57	83	4.61	5.8	345	0.68	60.11	2	57	4	5	1.34	16166	101.52	66.4	162.1	25.3	84.5	5.2	64	1.66	197	5.09	83	0.937	116	3	8.1	75	10.8	1	0	1	88	0	0	2	0	1	1	1	0	10	2	0	1
23432	36	39	15	5.36	144	7.99	5.3	315.2	0.8	70.72	1	68	1	1	2.29	3300.11	96.4	91.7	171.6	31.14	110.5	6.9	76	1.97	181	4.68	69	0.779	91	2.353	8.1	142	5.7	2	0	1	73	0	1	3	0	1	1	1	0	18.4	2	1	1
61009	36	40	18	6.43	105	5.83	7.1	422.3	1.4	123.76	1	80	3	1	3.43	21842.2	50.81	95.9	169.9	33.22	120.4	6	49	1.27	145	3.75	131	1.479	70	1.81	11.2	144	7.78	2	0	1	68	1	0	3	0	1	2	3	1	30	3	1	1
47384	35	80	7	2.5	102	5.66	5.6	333.1	0.82	72.49	1	64	1	1	0.7	5524.58	98.09	74.5	165.7	27.13	103.7	5.2	87	2.25	190	4.91	103	1.163	82	2.121	7.5	205	3.66	2	0	1	85	1	0	2	0	1	1	1	0	11.2	2	1	1
11679	33	20	16	5.71	96	5.329	10.2	606.7	1.1	97.24	1	45	4	3	1.94	8463.81	84.37	107.9	188.8	30.27	109.4	6.1	40	1.03	298	7.71	201	2.27	218	5.64	16.8	174	9.66	2	0	1	95	1	1	3	1	1	1	2	0	30	3	1	1
22950	33	39	11	3.93	115	6.38	6.5	386.6	1.1	97.24	1	42	4	2	1.55	23640.3	85.95	62.5	161.1	24.08	86.6	5.6	66	1.71	350	9.05	146	1.648	255	6.594	8.4	184	4.57	2	0	1	89	1	0	1	1	1	1	2	0	9.4	1	0	1
26300	33	34	13	4.64	98	5.44	6.4	380.7	1	88.4	1	71	2	5	5	9185.01	80.47	94.6	186.9	27.08	107.4	5.6	42	1.09	166	4.29	120	1.355	100	2.586	12.4	188	6.6	2	1	1	74	1	0	2	0	1	1	2	0	30	3	1	1
54042	32	26	11	3.93	96	5.33	7.6	452	0.91	80.44	1	49	1	2	1.55	18632.6	103.32	95.6	172.1	32.28	105.7	5.7	48	1.24	161	4.16	99	1.118	93	2.405	15.6	167	9.34	2	0	1	79	1	0	3	0	1	1	1	0	7.9	1	1	1
52635	31	30	20	7.14	99	5.5	4.1	243.9	0.77	68.07	2	76	3	3	1.65	48909.2	79.9	88.4	161.8	33.77	122.4	5.9	67	1.73	293	7.58	314	3.545	163	4.215	67.5	107	63.08	2	0	1	68	1	0	3	1	2	2	2	1	21.5	3	1	1
54891	31	34	12	4.28	86	4.77	8.9	529.4	1.15	101.66	1	64	4	2	1.94	10581	71.07	106.3	182	32.09	105.9	5.8	71	1.84	176	4.55	116	1.31	82	2.121	25.4	205	12.39	2	0	1	77	1	0	3	0	1	1	2	0	15.6	2	1	1
59206	31	24	19	6.78	123	6.83	7	416.4	0.94	83.1	1	58	3	5	5	98237.7	93.97	123.2	179.1	38.41	133.6	6.7	49	1.27	209	5.4	59	0.666	148	3.827	17.7	168	10.54	2	0	1	83	1	1	3	0	1	1	1	0	30	3	1	1
9210	31	28	16	5.7	107	5.94	5.4	321.2	0.6	53	2	68	3	4	5	27664.7	97.71	93.6	162.6	35.4	113.6	5.9	60	1.56	214	5.53	78	0.88	138	3.57	8.1	167	4.85	2	0	1	78	1	0	3	0	1	1	1	0	7.3	1	1	1
10436	30	30	15	5.36	96	5.329	7	416.4	0.9	79.56	1	52	4	3	4.66	11909.6	102.76	106.7	181.2	32.5	107.4	5.6	41	1.06	165	4.27	66	0.75	111	2.87	22.3	306	7.29	1	0	1	81	0	0	3	0	1	1	1	0	21.6	3	1	1
13951	30	24	14	5	92	5.107	7.5	446.1	0.9	79.56	1	65	3	4	5	19805.4	94.78	95.4	174.6	31.29	115.5	5.8	36	0.93	222	5.74	210	2.37	144	3.72	9.8	142	6.9	2	0	1	77	1	0	3	1	1	1	1	0	30	3	1	0
26285	30	31	12	4.28	125	6.94	6.5	386.6	1	88.4	1	40	5	4	1.24	43798.4	97.58	71.6	165.8	26.05	93.3	5.4	69	1.78	209	5.4	255	2.879	89	2.302	20	134	14.93	2	0	1	55	0	1	2	1	1	1	1	1	13.3	2	0	1
53732	30	26	18	6.43	104	5.77	7.3	434.2	0.94	83.1	1	79	3	4	4.23	8107.65	82.46	122.4	179.1	38.16	133.5	6.2	39	1.01	159	4.11	131	1.479	94	2.431	8.9	213	4.18	2	0	1	75	1	0	3	0	1	1	2	0	30	3	1	0
54875	30	34	9	3.21	82	4.55	5.7	339	1.02	90.17	1	60	4	4	1.86	10022.4	84.14	90	182.7	26.96	96.2	6	72	1.86	205	5.3	66	0.745	120	3.103	4.9	75	6.53	1	0	1	80	1	0	2	0	1	1	2	0	25.3	3	0	1
56377	30	29	16	5.71	93	5.16	6.4	380.7	1.03	91.05	2	67	3	5	4.4	68227.8	59.6	83.4	166.9	29.94	103.8	5.8	68	1.76	208	5.38	200	2.258	100	2.586	25	70	35.71	2	0	1	83	1	0	2	1	2	3	3	1	15.9	2	1	1
45992	29	47	7	2.5	132	7.33	5.9	350.9	0.7	61.88	2	75	3	1	1.28	25065.9	90.13	100.3	154.7	41.91	134.2	5.8	74	1.91	178	4.6	142	1.603	76	1.965	2	26	7.69	1	0	1	57	1	1	3	1	1	1	1	0	18.51	2	1	1
55256	29	27	21	7.5	97	5.38	4.2	249.8	1.15	101.66	1	57	3	4	5	72901.9	74.23	105	176.9	33.55	118.1	5.5	45	1.16	166	4.29	113	1.276	98	2.534	4.2	119	3.53	1	0	1	73	1	0	3	0	1	1	2	0	30	3	1	1
19303	27	19	14	5	199	11.046	3.6	214.1	0.5	44.2	2	52	1	1	1.94	5134.76	112.78	98.9	161.3	38.01	121.5	12.3	50	1.29	223	5.77	146	1.65	144	3.72	374.5	102	367.16	2	0	1	75	0	1	3	1	3	3	1	0	6.3	1	1	1
26239	27	28	11	3.93	122	6.77	6.3	374.7	0.8	70.72	1	62	1	4	2.02	4346.33	100.06	83	169.2	28.99	101.4	6.2	34	0.88	172	4.45	232	2.619	92	2.379	12.1	156	7.76	2	0	1	79	1	0	2	1	1	1	1	0	30	3	0	0
48934	27	30	14	5	103	5.72	6.5	386.6	0.72	63.65	1	57	1	1	0.73	16143	106.56	68.2	164.7	25.14	95.5	5.5	45	1.16	260	6.72	227	2.563	170	4.396	8.4	160	5.25	2	0	1	84	1	0	2	1	1	1	1	0	30	3	0	1
50697	27	27	10	3.57	96	5.33	5.5	327.1	0.72	63.65	2	35	4	5	2.64	23944.2	111.75	127.8	163	48.1	125.3	5.4	54	1.4	233	6.03	106	1.197	158	4.086	9.4	214	4.39	2	0	1	82	1	1	3	0	1	1	1	0	2.4	1	1	1
8697	27	28	13	4.6	153	8.493	7	416.4	0.8	70.7	1	70	3	3	1.96	17368.7	95.21	94.7	169	33.16	107.4	6.7	32	0.83	165	4.27	237	2.68	85	2.2	36.5	289	12.63	1	1	1	67	0	1	3	1	1	1	1	0	30	3	1	0
14238	26	26	17	6.07	103	5.718	4.4	261.7	1	88.4	1	79	3	4	5	12950.1	76.56	76.8	168.9	26.92	97	5.7	58	1.5	215	5.56	81	0.91	141	3.65	11	171	6.43	2	0	1	78	1	0	2	0	1	1	2	0	29.4	3	0	1
19595	26	28	15	5.36	207	11.491	6.3	374.7	1.1	97.24	1	73	3	5	2.85	14905.5	70.88	105.8	176.3	34.04	117.9	7.3	32	0.83	138	3.57	392	4.43	28	0.72	10.7	181	5.91	1	0	1	59	0	1	3	1	1	1	2	0	30	3	1	0
20347	26	23	19	6.78	98	5.44	4.9	291.5	1	88.4	1	59	3	4	4.48	34750.5	86.7	78.6	171.7	26.66	96.3	5.3	43	1.11	235	6.08	170	1.92	158	4.09	4.7	104	4.52	2	0	1	86	0	0	2	1	1	1	2	0	30	3	0	1
61157	26	32	19	6.78	85	4.72	3.5	208.2	0.63	55.69	2	80	3	1	2.06	39043.8	89.62	64.2	153.8	27.14	106.3	6	78	2.02	192	4.97	85	0.96	97	2.508	3.7	55	6.73	1	0	1	62	1	0	2	0	1	1	2	0	11.7	2	1	1
15804	25	20	20	7.14	100	5.551	5.3	315.2	0.9	79.56	2	74	3	3	5	18243	67.08	70.6	157.3	28.53	96	5.4	53	1.37	183	4.73	121	1.37	106	2.74	7	178	3.93	2	0	1	61	1	0	2	0	1	1	2	0	13.7	2	1	1
31559	25	29	14	5	121	6.72	6.3	374.7	0.7	61.88	2	66	3	3	3.21	63157.8	95.32	73.6	155.3	30.52	115	7	51	1.32	199	5.15	301	3.398	88	2.276	13.2	57	23.16	1	0	1	73	0	1	3	1	1	1	1	0	10	2	1	1
59795	25	26	15	5.36	88	4.88	3.5	208.2	0.62	54.81	2	62	2	4	4.39	4997.01	100.63	71.8	153.3	30.55	96.2	5.5	61	1.58	207	5.35	92	1.039	128	3.31	12.3	92	13.37	2	0	1	71	0	0	3	0	1	1	1	0	15.9	2	1	1
26827	24	27	14	5	85	4.72	4.8	285.5	0.8	70.72	2	55	1	3	3.67	18297.2	86.96	84.1	163.8	31.34	102.6	5.5	54	1.4	298	7.71	393	4.437	165	4.267	4.7	77	6.1	2	0	1	80	0	0	3	1	1	1	2	0	13.7	2	1	1
34423	24	21	7	2.5	168	9.33	5.3	315.2	0.8	70.72	2	58	4	4	0.73	26457.7	85.35	91.9	159.6	36.08	115.7	7.9	42	1.09	138	3.57	127	1.434	71	1.836	11.3	151	7.48	2	1	1	56	0	1	3	0	1	1	2	0	13.7	2	1	0
12404	23	35	25	8.93	232	12.878	7.2	428.3	1	88.4	1	65	3	3	1.47	29147.7	83.52	123.7	171.2	42.2	134.2	9.4	42	1.09	153	3.96	192	2.17	115	2.97	1448	93	1556.99	1	0	1	55	0	1	3	1	3	3	2	1	30	3	1	1
26432	23	24	11	3.93	99	5.5	6.3	374.7	1.2	106.08	1	48	4	3	5	26397.3	74.6	68.3	176.6	21.9	78.5	4.9	40	1.03	223	5.77	97	1.095	164	4.241	4.6	212	2.17	2	0	1	91	1	0	1	0	1	1	2	0	21.6	3	0	1
36975	23	22	13	4.64	102	5.66	6.1	362.8	1.2	106.08	1	75	3	5	5	33006.9	63.06	69	165.1	25.31	95.1	5.7	45	1.16	259	6.7	197	2.224	175	4.526	34	248	13.71	2	0	1	0	1	0	2	1	1	1	2	0	30	3	0	1
46050	23	22	12	4.28	91	5.05	6.1	362.8	1.02	90.17	1	60	3	5	0.73	18457	84.14	91	176.9	29.08	99.2	5.8	57	1.47	192	4.97	121	1.366	111	2.87	4.8	101	4.75	2	0	1	79	1	0	2	0	1	1	2	0	25.3	3	0	1
56798	23	21	17	6.07	108	6	6.8	404.5	1.03	91.05	1	70	3	3	1.92	9707.52	78.15	131.3	169.6	45.65	138.3	6	43	1.11	210	5.43	107	1.208	146	3.776	6.2	108	5.74	2	0	1	70	1	0	3	0	1	1	2	0	30	3	1	1
57934	23	24	9	3.21	87	4.83	4.3	255.8	0.79	69.84	2	74	3	4	5	41533	78.44	71.6	166.5	25.83	94.3	5.6	71	1.84	195	5.04	141	1.592	96	2.483	29.6	126	23.49	1	0	1	78	0	0	2	1	1	1	2	0	15.9	2	1	1
59622	23	27	13	4.64	81	4.5	3.7	220.1	0.54	47.74	2	60	1	3	2.7	8100.45	105.33	55.8	144.7	26.65	91.4	5.6	59	1.53	315	8.15	217	2.45	213	5.508	92.3	160	57.69	1	0	1	77	0	0	2	1	2	2	1	0	10	2	1	1
63664	23	19	11	3.93	298	16.54	4.9	291.5	0.79	69.84	1	58	5	5	5	18916.7	102.97	84.5	175.9	27.3	98	10.6	58	1.5	270	6.98	205	2.314	171	4.422	11.2	43	26.05	2	0	1	76	0	1	2	1	1	1	1	0	21.6	3	0	1
7277	23	31	16	5.7	77	4.274	6.2	368.8	0.6	53	2	71	3	4	3.17	18133.2	95.9	58.1	153.8	24.56	80.5	5	86	2.21	242	6.26	137	1.55	129	3.34	9.4	81	11.6	2	0	1	73	0	0	1	1	1	1	1	0	21.5	3	0	1
10243	22	23	20	7.14	88	4.885	4.4	261.7	0.8	70.72	2	82	3	5	5	7451.13	73.52	57.5	159.1	22.72	79.4	5.2	97	2.51	222	5.74	69	0.78	111	2.87	7.2	74	9.73	2	0	1	77	0	0	1	0	1	1	2	0	15.9	2	0	1
36268	22	19	4	1.43	95	5.27	5.3	315.2	0.7	61.88	2	49	3	5	5	71945.8	105.95	94.5	156.9	38.39	103.3	5.6	49	1.27	226	5.84	498	5.622	115	2.97	4.3	62	6.94	2	0	1	71	0	0	3	1	1	1	1	0	7.3	1	1	0
55413	22	24	18	6.43	132	7.33	6.4	380.7	1.44	127.3	1	71	3	3	3.08	27519.8	51.95	99	183.1	29.53	105.2	6.5	45	1.16	137	3.54	114	1.287	69	1.784	23.7	124	19.11	2	0	1	60	0	1	2	0	1	2	3	1	25.3	3	1	1
57120	22	22	21	7.5	244	13.54	4.7	279.6	0.63	55.69	2	65	2	2	1.72	6280.38	98.39	79.9	160.2	31.13	104.8	9.7	82	2.12	229	5.92	72	0.813	133	3.439	32.3	115	28.09	1	0	1	65	0	1	3	0	1	1	1	1	10	2	1	1
61678	22	28	10	3.57	93	5.16	3.8	226	0.67	59.23	2	35	3	4	0.36	14429.2	116.82	92.9	165.8	33.79	113	4.5	54	1.4	179	4.63	65	0.734	112	2.896	36.8	311	11.83	2	0	1	99	1	0	3	0	1	1	1	0	3.3	1	1	1
65348	22	20	7	2.5	78	4.33	4.5	267.7	0.61	53.92	2	45	3	5	5	99120.1	112.29	76.2	160.8	29.5	100.4	4.8	91	2.35	258	6.67	107	1.208	146	3.776	12.6	144	8.75	2	0	1	73	0	0	2	0	1	1	1	0	3.9	1	1	1
14462	21	24	20	7.14	94	5.218	6.9	410.4	1.2	106.08	1	70	3	3	5	16941.5	65.06	89.4	165.6	32.6	115	5.1	48	1.24	223	5.77	264	2.98	122	3.15	8.8	124	7.1	2	0	1	76	1	0	3	1	1	1	2	0	30	3	1	1
14961	21	21	7	2.5	87	4.829	3	178.4	0.7	61.88	2	34	3	2	1.72	37439	116.31	66.6	159.9	26.05	89.6	5.2	42	1.09	243	6.28	153	1.73	170	4.4	3.9	95	4.11	2	0	1	74	0	0	2	1	1	1	1	0	4.5	1	1	0
1624	21	27	12	4.3	93	5.162	6.5	386.6	0.5	44.2	2	47	4	2	1.74	16604.5	116.34	71.1	166.3	25.71	96.4	5.4	66	1.7	230	5.95	199	2.25	125	3.23	1.5	171	0.88	2	0	1	90	0	0	2	1	1	1	1	0	7.3	1	1	1
25141	21	24	16	5.71	102	5.66	4.7	279.6	1.2	106.08	1	64	3	4	3.32	50864.4	67.53	118.6	190.8	32.58	118.2	5.6	47	1.22	187	4.84	67	0.756	127	3.284	110.4	281	39.29	2	0	1	91	1	0	3	0	2	2	2	1	30	3	1	1
45903	21	28	16	5.71	86	4.77	5.2	309.3	0.78	68.95	2	71	3	4	3.57	33663.7	81.15	56.1	159.9	21.94	81.6	5.6	59	1.53	187	4.84	135	1.524	101	2.612	5.6	51	10.98	2	0	1	63	0	0	1	1	1	1	2	0	11.7	2	0	1
47060	21	24	17	6.07	93	5.16	5.6	333.1	0.92	81.33	1	31	1	2	3.21	30655.8	114.05	87.5	176.8	27.99	101.7	5.6	46	1.19	213	5.51	38	0.429	159	4.112	3.9	129	3.02	2	0	1	73	0	0	2	0	1	1	1	0	3.3	1	0	1
50491	21	25	24	8.57	112	6.22	8.5	505.6	1.2	106.08	1	65	5	3	0.1	19866.9	67.11	51.2	163.4	19.18	77.9	5.5	58	1.5	208	5.38	118	1.332	126	3.258	1920	72	2666.67	2	0	1	78	1	0	1	0	3	3	2	1	30	3	0	1
50781	21	18	14	5	101	5.61	5.9	350.9	0.95	83.98	1	64	3	4	4.64	58553	89.38	113.8	181.3	34.62	127.9	5.6	45	1.16	194	5.02	211	2.382	107	2.767	66.1	117	56.5	1	0	1	71	1	0	3	1	2	2	2	1	30	3	1	1
56573	21	25	21	7.5	89	4.94	6.7	398.5	1.05	92.82	1	74	3	3	1.29	12140.8	74.49	77.7	168.7	27.3	113.6	5.9	79	2.04	244	6.31	134	1.513	138	3.569	41.9	137	30.58	2	0	1	52	1	0	2	0	2	2	2	1	30	3	1	1
59463	21	20	15	5.36	85	4.72	6.8	404.5	0.86	76.02	2	54	3	3	1.36	90910.8	80.23	93.8	156.3	38.4	109	4.8	61	1.58	222	5.74	78	0.881	145	3.75	10.6	233	4.55	1	0	1	74	0	0	3	0	1	1	2	0	5.3	1	1	1
7409	21	21	14	5	134	7.438	6	356.9	0.8	70.7	1	80	1	1	0.49	1289.87	89.47	78.5	163.8	29.26	106.5	5.4	45	1.16	187	4.84	137	1.55	115	2.97	549	290	189.31	1	1	1	68	0	1	2	1	2	2	2	1	30	3	1	1
13282	20	36	19	6.78	98	5.44	4.3	255.8	1	88.4	1	85	3	1	2.22	4409.7	73.76	57.9	170.2	19.99	82	5.2	77	1.99	171	4.42	65	0.73	81	2.09	2.9	37	7.84	2	1	1	61	0	0	1	0	1	1	2	0	21.6	3	0	1
20326	20	23	11	3.93	82	4.552	7.7	458	1.1	97.24	1	65	4	4	4.31	5082.39	74.5	88.1	175	28.77	99.6	6	41	1.06	238	6.15	119	1.34	173	4.47	20.9	225	9.29	2	0	1	94	1	0	2	0	1	1	2	0	30	3	0	1
3492	20	23	23	8.2	105	5.829	3.6	214.1	1.1	97.2	1	81	3	5	5	7625.11	67.44	67.3	166.5	24.28	92.2	5.7	51	1.31	167	4.32	168	1.9	83	2.15	10.2	222	4.59	2	0	1	61	1	0	1	1	1	1	2	0	25.3	3	0	1
3686	20	24	14	5	100	5.551	5.6	333.1	0.8	70.7	1	61	1	2	2.1	4461.96	100.69	70.6	163.3	26.47	90	4.9	36	0.93	218	5.64	132	1.49	156	4.03	30.9	306	10.1	2	1	1	74	0	0	2	0	1	1	1	0	21.6	3	0	0
39505	20	33	10	3.57	97	5.38	4.8	285.5	0.9	79.56	2	74	3	4	5	53574.9	67.08	65.9	170	22.8	84	5.2	84	2.17	185	4.78	116	1.31	78	2.017	2.8	66	4.24	2	0	1	75	1	0	1	0	1	1	2	0	10	2	0	1
43393	20	38	9	3.21	98	5.44	7.4	440.2	1.13	99.89	1	21	5	2	4.72	24342.5	94.83	70.8	176.2	22.8	77.9	5.4	61	1.58	170	4.4	91	1.027	91	2.353	6.2	170	3.65	2	0	1	53	1	0	1	0	1	1	1	0	3.9	1	0	1
54370	20	18	9	3.21	150	8.33	5.9	350.9	0.96	84.86	1	46	1	4	1.03	20746.6	98.72	123.6	178.7	38.71	129.5	6.7	57	1.47	181	4.68	129	1.456	98	2.534	12	107	11.21	4	0	1	88	0	1	3	0	1	1	1	0	13.3	2	1	1
54433	20	27	10	3.57	94	5.22	4.5	267.7	0.77	68.07	2	47	3	3	5	82071.7	95.69	62.3	162.9	23.48	84.7	5.1	50	1.29	162	4.19	87	0.982	95	2.457	12.5	253	4.94	2	0	1	72	0	0	1	0	1	1	1	0	6.3	1	0	1
55896	20	20	11	3.93	89	4.94	7.6	452	1.03	91.05	1	53	4	4	1.5	12838.2	86.86	93	189.8	25.82	100.2	5.4	64	1.66	197	5.09	116	1.31	110	2.845	16.7	168	9.94	2	0	1	97	0	0	2	0	1	1	2	0	13.3	2	0	1
59809	20	21	10	3.57	133	7.38	7.5	446.1	0.8	70.72	1	57	2	1	0.6	14464.5	103.22	68.1	167.2	24.36	92.9	5	45	1.16	253	6.54	112	1.264	186	4.81	8.9	97	9.18	1	0	1	86	0	1	1	0	1	1	1	0	30	3	0	1
63708	20	23	14	5	106	5.88	3.3	196.3	0.88	77.79	1	63	5	5	1.72	13133.9	96.62	85.9	166.7	30.9	109.6	6.2	57	1.47	136	3.52	71	0.802	65	1.681	140.3	150	93.53	2	0	1	69	1	1	3	0	2	2	1	0	29.4	3	1	1
64734	20	20	10	3.57	117	6.49	3.9	232	0.72	63.65	2	68	4	4	1.32	12331.4	91.02	81.4	158.4	32.4	111.6	6	57	1.47	220	5.69	141	1.592	135	3.491	11.6	151	7.68	2	0	1	37	1	0	3	1	1	1	1	0	18.51	2	1	1
7951	20	19	14	5	109	6.051	5.9	350.9	0.6	53	2	46	2	1	2.84	32108.9	112.04	72.8	153.8	30.78	94.7	6.2	58	1.49	191	4.94	141	1.59	105	2.72	435.5	166	262.35	2	0	1	86	1	1	3	1	2	2	1	0	4.5	1	1	1
28377	19	22	12	4.28	65	3.61	4.8	285.5	0.9	79.56	1	74	3	4	4.32	32141.6	89.62	93.8	189.4	26.15	102.6	5.7	45	1.16	210	5.43	211	2.382	123	3.181	9.1	83	10.96	2	0	1	74	1	1	2	1	1	1	2	0	30	3	1	1
37751	19	27	12	4.28	91	5.05	4.7	279.6	0.9	79.56	1	55	3	4	5	135473	100.86	70.5	174.8	23.07	86	5	76	1.97	217	5.61	196	2.213	102	2.638	9.3	90	10.33	2	0	1	60	0	0	1	1	1	1	1	0	11.2	2	0	1
43908	19	26	18	6.43	81	4.5	4	237.9	0.72	63.65	2	55	3	4	5	135815	98.68	63.5	162.8	23.96	82.5	5.1	77	1.99	207	5.35	67	0.756	117	3.026	10.2	59	17.29	2	0	1	71	0	0	1	0	1	1	1	0	7.3	1	0	1
52936	19	22	14	5	95	5.27	5.1	303.3	0.52	45.97	2	73	3	3	1.85	38596.5	98.04	90.1	154	37.99	118.7	5.6	63	1.63	186	4.81	184	2.077	86	2.224	4.8	70	6.86	2	0	1	69	0	0	3	1	1	1	1	0	10	2	1	1
53260	19	34	16	5.71	41	2.28	6.2	368.8	1.01	89.28	1	24	3	5	3.88	101815	106.5	92.1	189.5	25.65	87.7	5.1	61	1.58	132	3.41	41	0.463	63	1.629	4.1	140	2.93	2	0	1	51	0	1	2	0	1	1	1	0	2.3	1	0	1
17211	18	27	13	4.64	93	5.162	4.1	243.9	0.8	70.72	2	65	3	5	5	20507.7	81.72	68.7	166.9	24.66	89.3	5	142	3.67	267	6.9	64	0.72	112	2.9	3.1	16	19.38	2	0	1	88	0	0	1	0	1	1	2	0	13.7	2	1	1
20595	18	31	21	7.5	83	4.607	8	475.8	1.4	123.76	1	56	3	1	3.88	34091.2	58.99	84.6	168.3	29.87	104.6	5.4	42	1.09	223	5.77	128	1.45	155	4.01	2.7	155	1.74	1	1	1	89	0	0	2	0	1	2	3	1	25.3	3	1	1
22444	18	26	15	5.36	94	5.22	4.8	285.5	1	88.4	1	78	1	3	1.32	3758.8	77.04	67.7	171.3	23.07	97	5.4	44	1.14	184	4.76	91	1.027	122	3.155	12.1	57	21.23	2	0	1	82	0	0	1	0	1	1	2	0	30	3	0	1
39538	18	21	19	6.78	71	3.94	3.6	214.1	0.8	70.72	2	60	3	5	1.02	35546.3	84.3	108.4	160	42.34	114.8	5.2	54	1.4	147	3.8	105	1.185	72	1.862	14	187	7.49	1	0	1	71	0	0	3	0	1	1	2	0	7.3	1	1	1
51465	18	18	11	3.93	106	5.88	5.6	333.1	0.76	67.18	2	50	3	3	5	118719	95.4	93	163.7	34.7	106	6.1	46	1.19	134	3.47	78	0.881	72	1.862	12.2	144	8.47	2	0	1	85	1	1	3	0	1	1	1	0	11.7	2	1	0
54143	18	17	10	3.57	94	5.22	6.5	386.6	0.62	54.81	2	71	3	4	5	37776.8	95.15	69.2	147.9	31.64	110.7	6.1	55	1.42	257	6.65	276	3.116	147	3.801	4.5	47	9.57	1	0	1	62	1	0	3	1	1	1	1	0	15.9	2	1	1
62861	18	23	12	4.28	147	8.16	4.5	267.7	0.7	61.88	2	80	3	3	1.88	60072	87.38	50.1	164.9	18.4	74.4	7.3	76	1.97	201	5.2	61	0.689	113	2.922	16.4	49	33.47	1	0	1	71	0	1	1	0	2	2	2	1	15.9	2	0	1
6213	17	21	23	8.2	91	5.051	4.6	273.6	0.8	70.7	1	69	4	1	1.46	7569.16	95.8	114.4	181.3	34.8	119	5.7	44	1.14	116	3	85	0.96	55	1.42	24.2	272	8.9	1	0	1	83	1	0	3	0	1	1	1	0	30	3	1	1
63426	17	21	10	3.57	107	5.94	3.7	220.1	0.98	86.63	1	58	3	2	1.19	32720.7	89.38	83.3	175.9	26.9	105.8	5.9	59	1.53	161	4.16	76	0.858	87	2.25	33.1	184	17.99	2	0	1	81	1	0	2	0	1	1	2	0	21.6	3	1	1
64261	17	21	13	4.64	100	5.55	4.3	255.8	0.67	59.23	1	67	5	5	5	13639	102.34	75.8	176	24.5	91.6	5.6	42	1.09	237	6.13	115	1.298	172	4.448	4.3	122	3.52	1	0	1	64	1	0	1	0	1	1	1	0	30	3	1	1
65393	17	28	22	7.85	111	6.16	7.5	446.1	1.29	114.04	1	78	3	3	1.22	15844.5	56.75	108.1	170.3	37.3	129	6	28	0.72	203	5.25	220	2.484	131	3.388	12.5	99	12.63	1	0	1	51	1	0	3	1	1	2	3	1	30	3	1	0
20570	16	19	9	3.21	94	5.218	2.9	172.5	0.6	53.04	2	52	3	5	3.39	34649.3	107.93	68.4	165.6	24.94	89.7	5.5	80	2.07	226	5.84	78	0.88	115	2.97	1.2	30	4	2	0	1	81	0	0	1	0	1	1	1	0	4.5	1	1	1
55076	16	26	11	3.93	99	5.5	3.5	208.2	0.69	61	2	80	3	2	1.66	23783.2	87.68	54.9	157.4	22.16	77.5	5.7	88	2.28	267	6.9	122	1.377	155	4.008	26.4	68	38.82	2	0	1	64	1	0	1	0	2	2	2	1	11.7	2	0	1
62064	16	18	22	7.85	82	4.55	5.5	327.1	1.04	91.94	2	77	3	4	1.8	23633.6	55.36	66.6	157.2	26.95	92	5.7	47	1.22	238	6.15	315	3.556	128	3.31	6.1	106	5.75	2	0	1	75	1	0	2	1	1	2	3	1	18.51	2	1	0
976	16	16	8	2.9	103	5.718	6.9	410.4	0.8	70.7	1	41	4	4	3.26	9346.63	114.02	101.1	170.6	34.74	110.1	5.5	46	1.19	219	5.66	58	0.65	161	4.16	13.8	488	2.83	1	0	1	97	1	0	3	0	1	1	1	0	7.9	1	1	1
12963	15	17	10	3.57	168	9.326	4.2	249.8	1	88.4	1	60	5	5	3.45	22400	86.16	72.4	178.1	22.82	92.3	8.6	54	1.4	161	4.16	101	1.14	87	2.25	5.7	112	5.09	2	0	1	77	0	1	1	0	1	1	2	0	13.3	2	0	1
17251	15	20	18	6.43	124	6.883	4.5	267.7	1.3	114.92	2	85	3	1	0.56	7277.19	40.3	72.1	150.9	31.66	101	5.9	33	0.85	227	5.87	378	4.27	118	3.05	5.6	116	4.83	2	0	1	49	1	1	3	1	1	3	4	1	24.8	3	1	0
1754	15	28	17	6.1	99	5.495	5.2	309.3	1	88.4	1	82	3	2	2.71	7625.11	75.14	74.7	167.5	26.63	96	5.2	72	1.85	233	6.03	83	0.94	145	3.75	3.4	79	4.3	2	0	1	80	1	0	2	0	1	1	2	0	25.3	3	0	1
38871	15	15	9	3.21	94	5.22	5.1	303.3	0.7	61.88	2	30	4	3	2.18	37165.6	119.24	100.3	158.4	39.98	108	6	40	1.03	94	2.43	69	0.779	40	1.034	120.5	243	49.59	2	0	1	91	1	0	3	0	2	2	1	0	1.7	1	1	0
42340	15	24	16	5.71	80	4.44	4.9	291.5	0.62	54.81	2	60	1	1	0.87	7812.28	101.89	72.7	149.9	32.35	108.5	5.1	61	1.58	206	5.33	175	1.976	110	2.845	173.5	109	159.17	2	0	1	65	0	0	3	1	2	2	1	0	10	2	1	1
5816	15	21	30	10.7	101	5.607	6.8	404.5	1.2	106.1	1	79	3	4	2.53	20310.7	61.52	79.1	176.5	25.39	98.4	5.3	35	0.91	149	3.85	109	1.23	92	2.38	34.8	121	28.76	1	0	1	65	1	0	2	0	1	1	2	0	30	3	0	0
31131	14	16	6	2.14	87	4.83	4.9	291.5	0.8	70.72	2	44	4	4	4.65	26457.7	93.12	75.2	156	30.9	96	6	39	1.01	105	2.72	86	0.971	49	1.267	18	202	8.91	1	1	1	73	1	0	3	0	1	1	1	0	4.5	1	1	0
31151	13	19	16	5.71	82	4.55	5.4	321.2	0.9	79.56	2	59	4	3	3.03	32632.5	73.64	82.9	167.6	29.51	101.2	5.8	76	1.97	205	5.3	123	1.389	104	2.689	41.5	97	42.78	1	1	1	73	1	1	2	0	2	2	2	1	7.3	1	1	1
50155	13	17	7	2.5	88	4.88	4.8	285.5	0.72	63.65	2	37	4	4	2.63	27356	110.37	104	161.5	39.87	117.7	4.9	78	2.02	160	4.14	35	0.395	75	1.94	5.3	87	6.09	2	0	1	85	0	0	3	0	1	1	1	0	2.4	1	1	1
1119	12	19	17	6.1	98	5.44	4.6	273.6	0.4	35.4	2	84	3	2	1.2	9272.85	97.53	68.9	165.6	25.12	96.7	5.6	91	2.36	289	7.47	245	2.77	149	3.85	12.8	103	12.43	2	0	1	65	1	0	2	1	1	1	1	0	13.7	2	1	1
21407	12	15	24	8.57	111	6.16	5.4	321.2	1.3	114.92	2	78	4	4	0.43	15215.8	42.09	84.2	160.4	32.73	111.8	6.6	68	1.76	183	4.73	69	0.779	101	2.612	10.1	41	24.63	1	0	1	38	1	1	3	0	1	3	4	1	11.7	2	1	1
33200	12	19	6	2.14	94	5.22	5.4	321.2	0.8	70.72	2	50	4	2	1.52	26398	89.71	114.9	166.7	41.35	124.9	4.7	52	1.34	196	5.07	104	1.174	123	3.181	611	109	560.55	1	0	1	0	0	0	3	0	3	3	2	1	7.3	1	1	1
36746	12	18	8	2.86	100	5.55	5.9	350.9	1.1	97.24	2	59	4	4	4.18	32632.5	57.88	80.2	158.1	32.09	95	5.3	59	1.53	212	5.48	82	0.926	137	3.543	33.8	348	9.71	2	0	1	61	1	0	3	0	1	2	3	1	6.3	1	1	1
56890	12	25	14	5	103	5.72	4.6	273.6	0.96	84.86	1	75	3	4	4.94	33131.4	82.43	91.4	186.7	26.22	108.1	6.1	53	1.37	250	6.47	104	1.174	176	4.551	7	105	6.67	2	0	1	63	1	0	2	0	1	1	2	0	30	3	1	1
6990	11	19	28	10	94	5.218	7	416.4	1.4	123.8	2	85	4	1	0.71	6503.33	36.87	52.9	155.1	21.99	81.5	5.4	53	1.37	247	6.39	100	1.13	174	4.5	6.9	124	5.56	1	0	1	57	0	0	1	0	1	3	4	1	18.51	2	0	1
9735	8	19	19	6.8	97	5.384	7	416.4	0.9	79.6	1	65	3	4	5	19563.6	94.78	71.4	171.9	24.16	98.7	5.5	51	1.31	207	5.35	77	0.87	141	3.65	18.2	276	6.59	2	0	1	81	0	0	1	0	1	1	1	0	30	3	0	1
20929	168	118	12	4.28	95	5.273	7.5	446.1	1	88.4	1	43	1	2	0.35	8946.12	95.77	70.9	171.7	24.05	98.7	5.5	46	1.19	180	4.65	152	1.72	104	2.69	15.1	169	8.93	2	0	1	89	1	0	1	1	1	1	1	0	13.3	2	0	1
64824	109	135	4	1.43	324	17.99	4.5	267.7	0.64	56.58	1	62	3	5	0.76	33364.9	107.04	106	180	32.7	132.2	11	26	0.67	208	5.38	302	3.41	122	3.155	14.9	101	14.75	1	0	1	65	0	1	3	1	1	1	1	0	30	3	1	0
34776	97	67	14	5	97	5.38	5.4	321.2	1.2	106.08	1	50	3	2	1.01	29577.9	73.67	102.5	175	33.47	117.3	5.7	38	0.98	244	6.31	229	2.585	160	4.138	9.5	37	25.68	2	0	1	73	1	0	3	1	1	1	2	0	29.4	3	1	0
25719	72	87	10	3.57	158	8.77	6	356.9	0.7	61.88	2	50	4	3	2.19	28227.7	105.3	75.7	159.9	29.61	104.9	6.3	49	1.27	267	6.9	745	8.411	115	2.97	6.7	147	4.56	2	0	1	88	1	1	2	1	1	1	1	0	11.7	2	1	0
1671	65	67	14	5	108	5.995	4.1	243.9	0.4	35.4	2	43	1	1	0.82	5074.41	125.86	75.5	151.4	32.94	97	6	32	0.82	282	7.29	187	2.11	213	5.51	10.9	182	5.99	1	0	1	83	1	0	3	1	1	1	1	0	7.3	1	1	0
59640	59	44	14	5	103	5.72	9.1	541.3	0.94	83.1	1	54	3	5	1.64	21595.5	96.33	129	175.7	41.79	129.8	5.9	32	0.83	150	3.88	208	2.348	76	1.965	7	133	5.26	2	0	1	82	1	0	3	1	1	1	1	0	15.6	2	1	0
34975	57	48	11	3.93	98	5.44	8.7	517.5	1	88.4	1	63	3	5	4.07	47720.4	84.57	99.1	188.2	27.98	111.8	5.1	50	1.29	277	7.16	480	5.419	115	2.97	19.4	165	11.76	2	0	1	86	1	0	2	1	1	1	2	0	30	3	1	1
14757	52	37	17	6.07	91	5.051	5.1	303.3	0.8	70.72	1	40	3	4	5	41072.1	114.74	93.4	173.4	31.06	105.3	5.4	46	1.19	333	8.61	476	5.37	115	2.97	25	191	13.09	2	0	1	91	0	0	3	1	1	1	1	0	29.4	3	1	1
15565	51	35	15	5.36	105	5.829	6.4	380.7	1	88.4	1	45	1	1	1.98	6868.66	94.59	91.2	180.6	27.96	106.2	5.4	42	1.09	227	5.87	139	1.57	157	4.06	12.4	176	7.05	1	0	1	83	1	0	2	1	1	1	1	0	11.2	2	1	1
25805	39	38	10	3.57	95	5.27	5.2	309.3	0.9	79.56	2	82	3	1	1.52	15578	63.83	55.7	159.9	21.79	76	5.4	62	1.6	172	4.45	70	0.79	96	2.483	8.1	134	6.04	1	0	1	70	0	0	1	0	1	1	2	0	15.9	2	0	1
43945	39	36	17	6.07	103	5.72	8	475.8	1.19	105.2	1	70	3	3	2.86	9935.27	65.71	89.5	169.6	31.12	111.5	5.9	41	1.06	203	5.25	252	2.845	112	2.896	10.7	128	8.36	2	1	1	62	1	0	3	1	1	1	2	0	30	3	1	1
51747	38	33	16	5.71	182	10.1	6	356.9	1.03	91.05	1	77	1	2	2.06	6536.55	74.82	117.7	164.2	43.65	141.5	7.8	42	1.09	155	4.01	141	1.592	85	2.198	81.5	98	83.16	1	0	1	63	0	1	3	1	2	2	2	1	30	3	1	1
8769	38	29	11	3.9	176	9.77	5.8	345	0.7	61.9	1	64	1	4	5	1980.33	102.89	111.6	175.7	36.15	120.4	8.2	29	0.75	181	4.68	172	1.94	117	3.03	23.8	124	19.19	1	0	1	77	0	1	3	1	1	1	1	0	30	3	1	0
11353	35	30	9	3.21	105	5.829	5.9	350.9	1	88.4	1	47	4	3	1.13	14280.4	93.42	78.6	173.5	26.11	89.8	5.6	65	1.68	235	6.08	552	6.23	115	2.97	9.1	115	7.91	2	0	1	63	1	0	2	1	1	1	1	0	13.3	2	0	1
1195	35	22	17	6.1	89	4.94	6.7	398.5	0.8	70.7	1	61	3	5	5	24004.5	100.69	110.9	172.4	37.31	122.7	5.6	36	0.93	207	5.35	133	1.5	144	3.72	4.1	106	3.87	2	0	1	90	0	0	3	0	1	1	1	0	30	3	1	0
22153	35	34	16	5.71	111	6.16	6	356.9	0.9	79.56	1	48	1	1	3.67	17305	105.35	72.1	173.6	23.92	87.5	5.4	56	1.45	177	4.58	96	1.084	102	2.638	6.1	184	3.32	2	0	1	88	1	0	1	0	1	1	1	0	18.4	2	0	1
52693	35	32	12	4.28	91	5.05	5.8	345	0.78	68.95	1	44	1	1	1.44	15319.9	112.77	81.5	169.7	28.3	101	5.4	61	1.58	240	6.21	78	0.881	163	4.215	8.6	100	8.6	2	0	1	93	0	0	2	0	1	1	1	0	6.7	1	0	1
7435	35	27	28	10	98	5.44	11.7	695.9	0.7	61.9	2	53	2	1	0.94	6355.27	103.35	91.9	164.6	33.92	106.9	5.6	42	1.09	182	4.71	154	1.74	109	2.82	19.6	153	12.81	1	0	1	83	0	0	3	1	1	1	1	0	7.3	1	1	0
35061	34	30	16	5.71	96	5.33	6.1	362.8	1	88.4	1	71	3	5	5	39351.7	80.47	91.5	175.3	29.78	115	5.8	47	1.22	172	4.45	170	1.919	91	2.353	8.5	128	6.64	2	0	1	53	1	0	2	1	1	1	2	0	30	3	1	1
11695	33	33	15	5.36	98	5.44	7	416.4	1.1	97.24	1	23	3	4	0.29	32244.2	96.74	69.8	172.1	23.57	77	5.2	52	1.34	170	4.4	84	0.95	101	2.61	14.4	165	8.73	2	0	1	82	0	0	1	0	1	1	1	0	1.9	1	0	1
51803	31	31	10	3.57	87	4.83	7.9	469.9	1.08	95.47	1	58	4	2	0.28	17158.9	79.54	94	179.2	29.27	102	5.6	69	1.78	233	6.03	88	0.994	146	3.776	3.5	126	2.78	2	0	1	89	0	0	2	0	1	1	2	0	21.6	3	1	1
7582	31	28	34	12.1	90	4.996	7	416.4	1	88.4	1	62	5	5	4.44	21295.4	85.1	66.9	175.1	21.82	90	5.7	53	1.37	235	6.08	136	1.54	155	4.01	7.3	173	4.22	1	0	1	83	1	0	1	1	1	1	2	0	21.6	3	0	1
47594	30	27	25	8.93	122	6.77	6.4	380.7	1.52	134.37	1	80	3	5	3.46	20784.2	46.03	90.9	172.7	30.48	117.5	7.1	47	1.22	137	3.54	72	0.813	76	1.965	139.4	54	258.15	1	0	1	54	0	1	3	0	2	3	3	1	25.3	3	1	1
59087	30	34	7	2.5	99	5.5	5.7	339	0.81	71.6	2	55	4	4	0.92	24860.8	85.67	117.7	166	42.71	123.1	5.7	80	2.07	166	4.29	99	1.118	66	1.707	7.3	221	3.3	2	1	1	92	1	0	3	0	1	1	2	0	10	2	1	1
[truncated: 8,623 more rows]
[truncated: 25 more columns]
